# Supplementary material
Source: publisher figshare collection journal article supplement (https://tandf.figshare.com/articles/dataset/_/9505346)

Solvent: CDCl<sub>3</sub> & NMR: 500 MHz

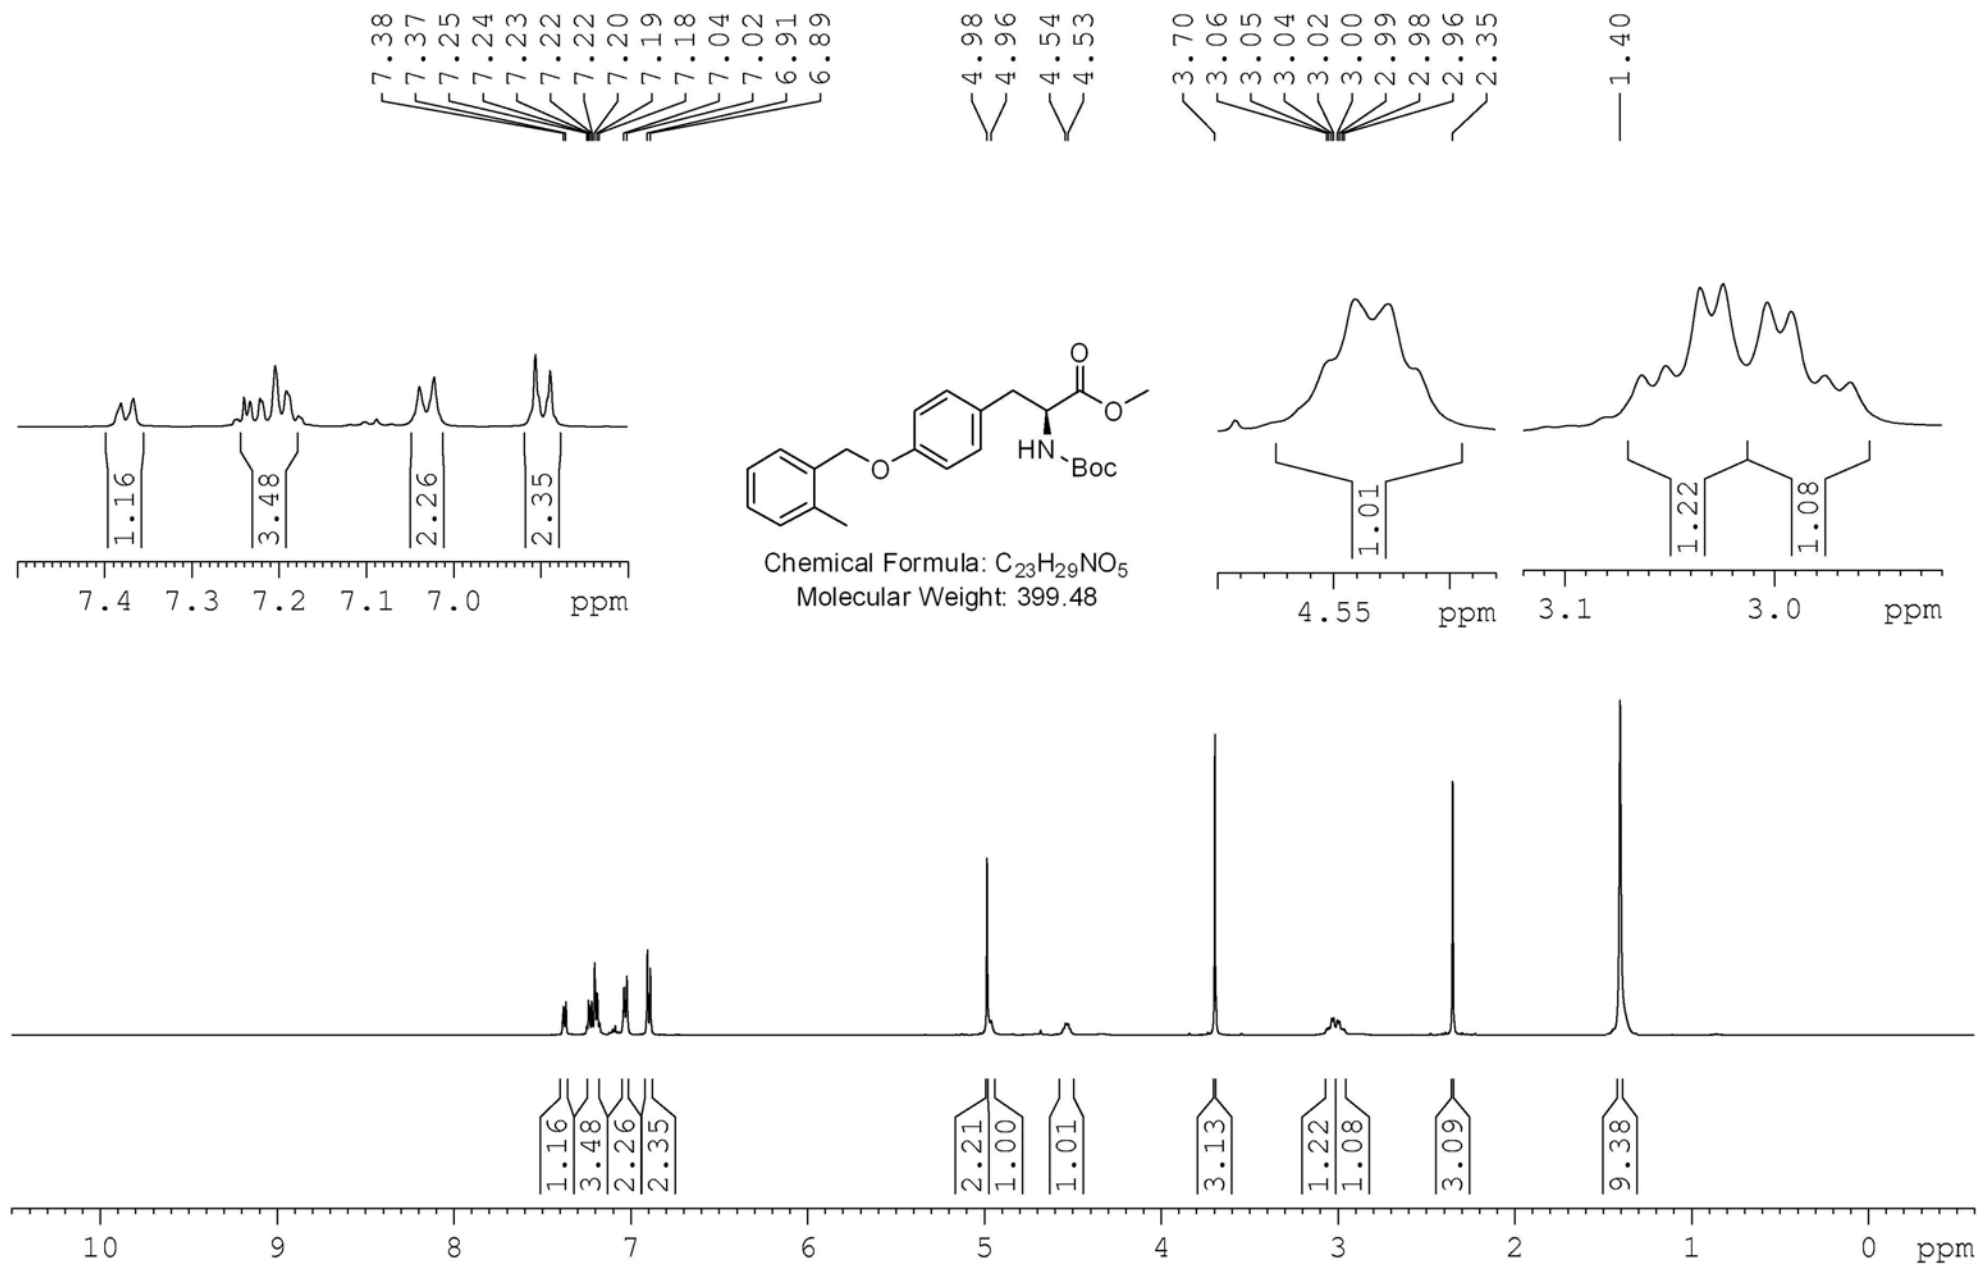

Solvent: CDCl<sub>3</sub> & NMR: 125 MHz

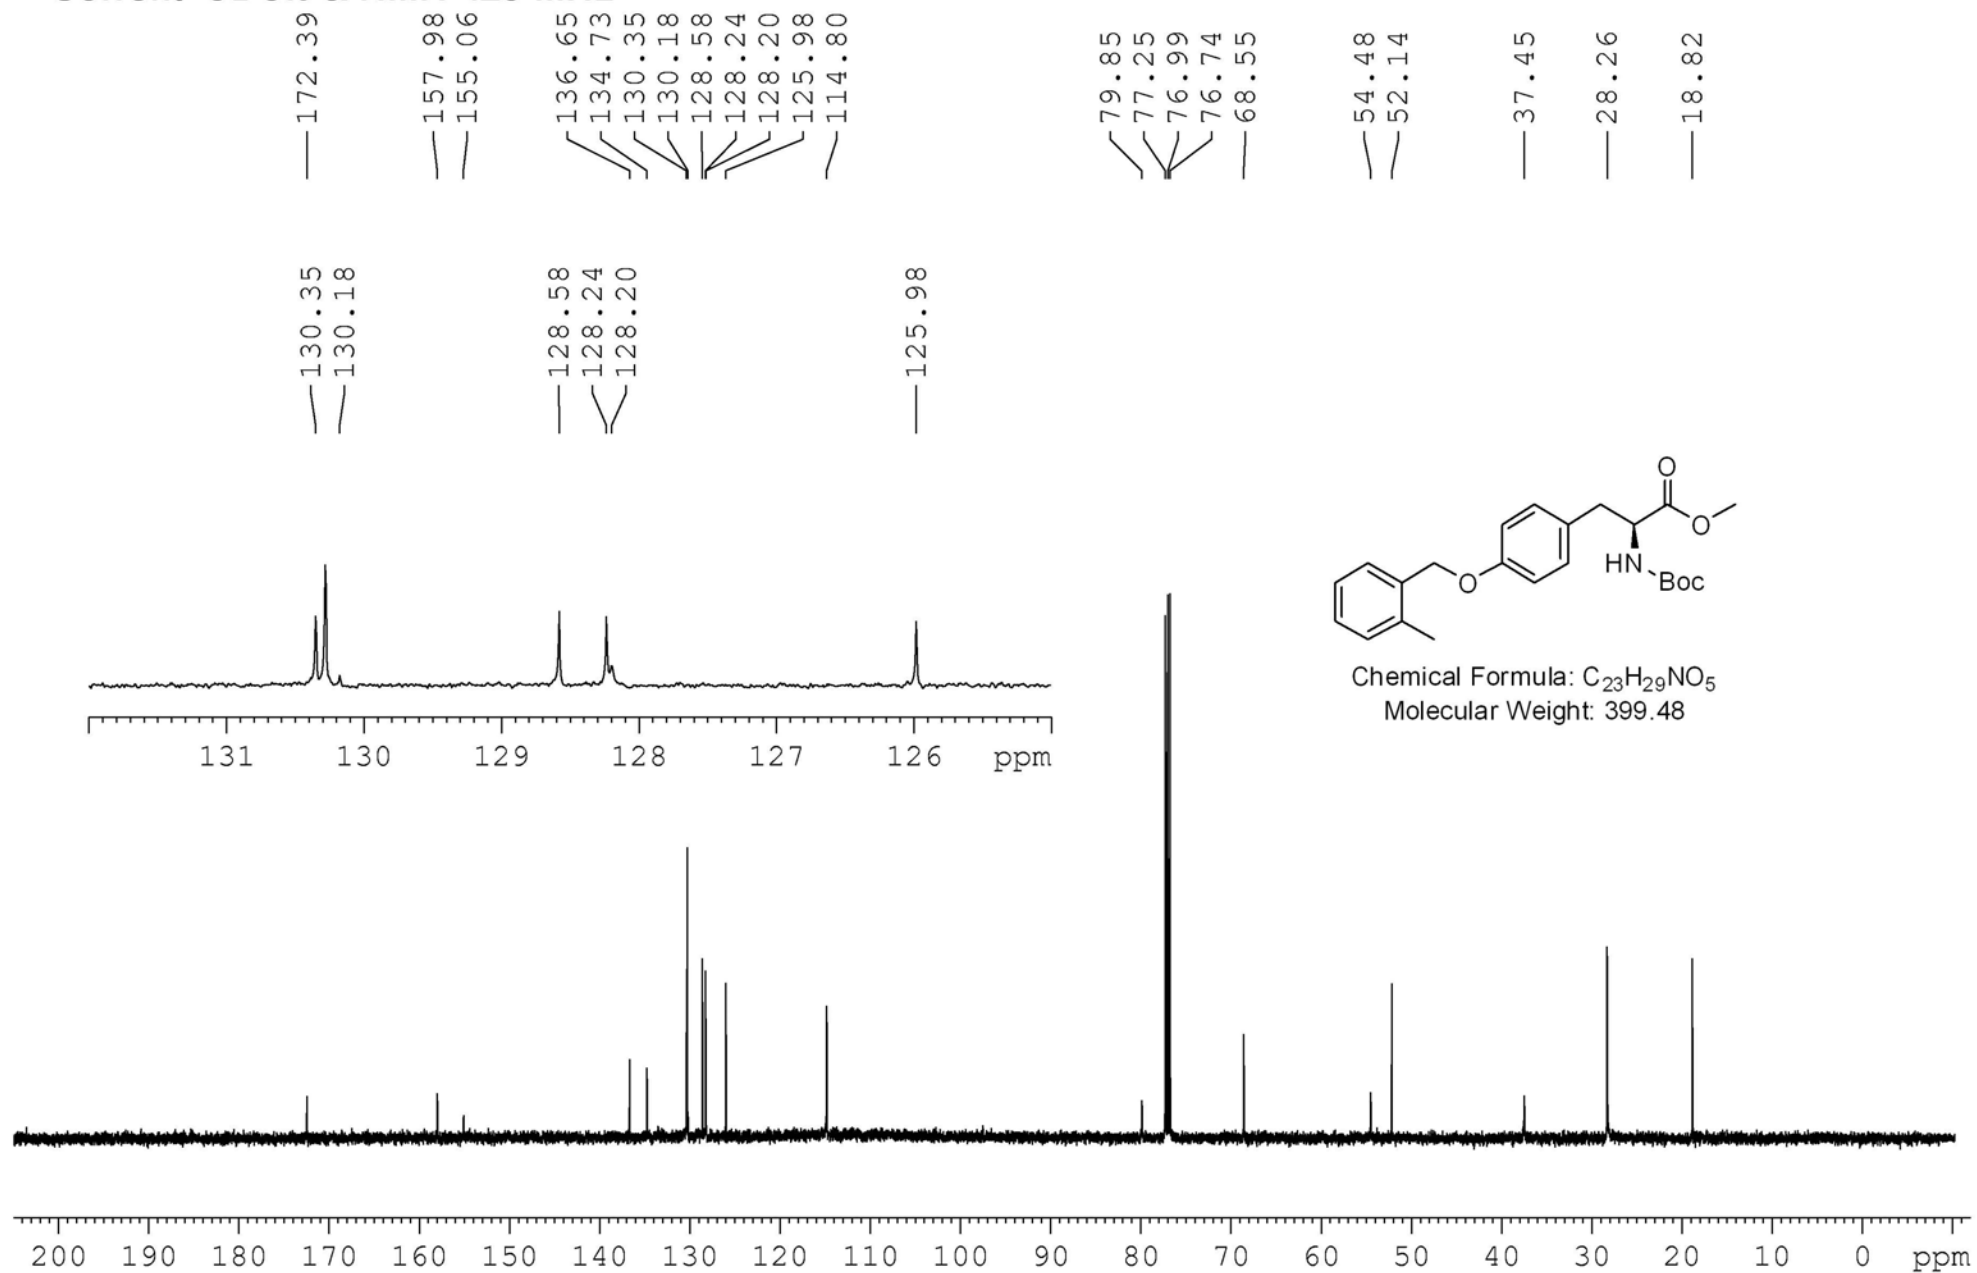

Solvent: CDCl<sub>3</sub> & NMR: 500 MHz

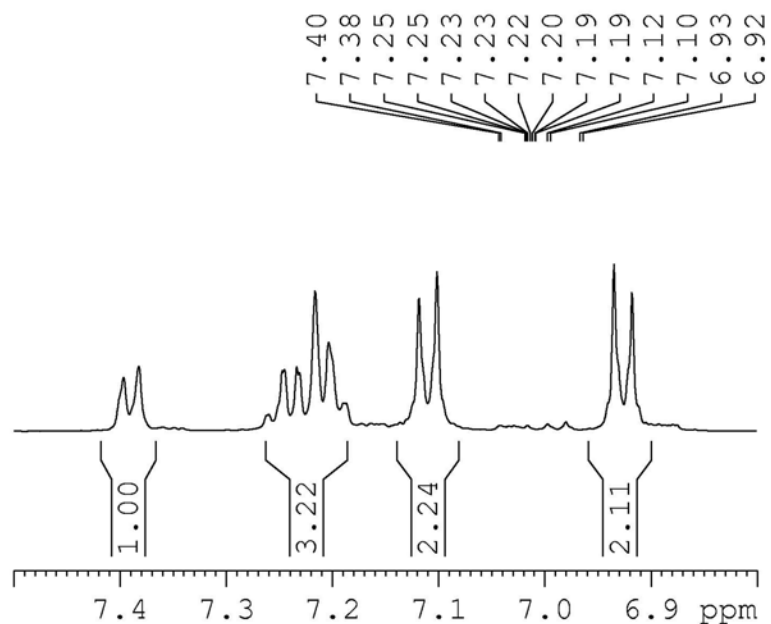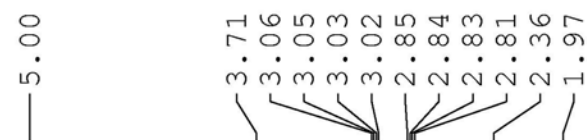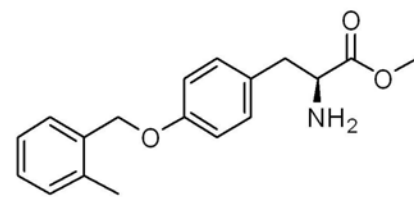

Chemical Formula: C<sub>18</sub>H<sub>21</sub>NO<sub>3</sub>  
Molecular Weight: 299.36

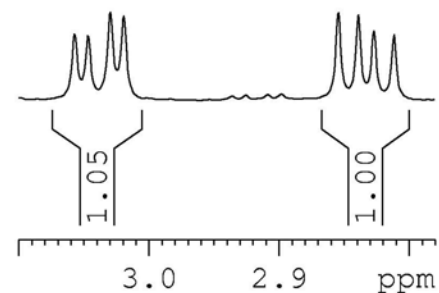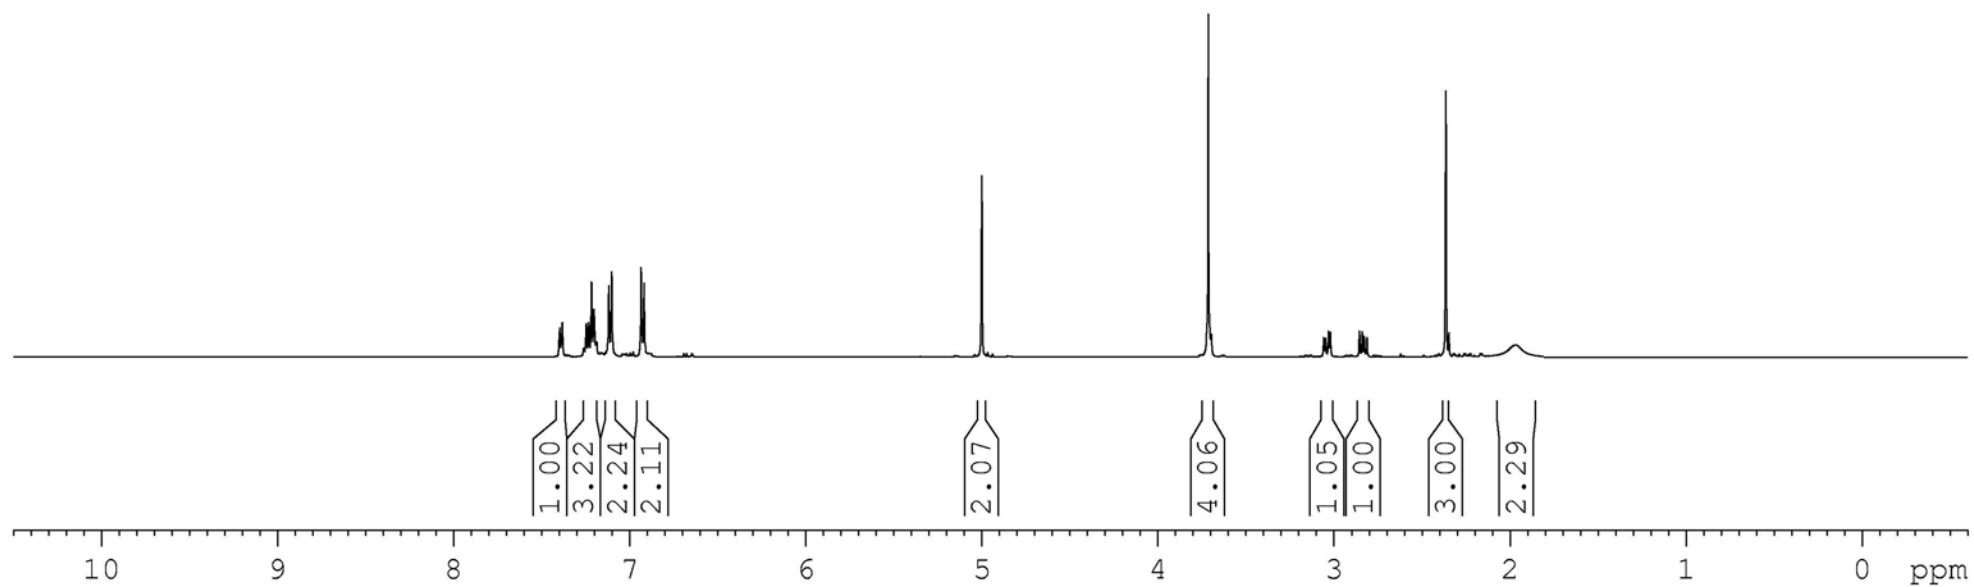

Solvent: CDCl<sub>3</sub> & NMR: 125 MHz

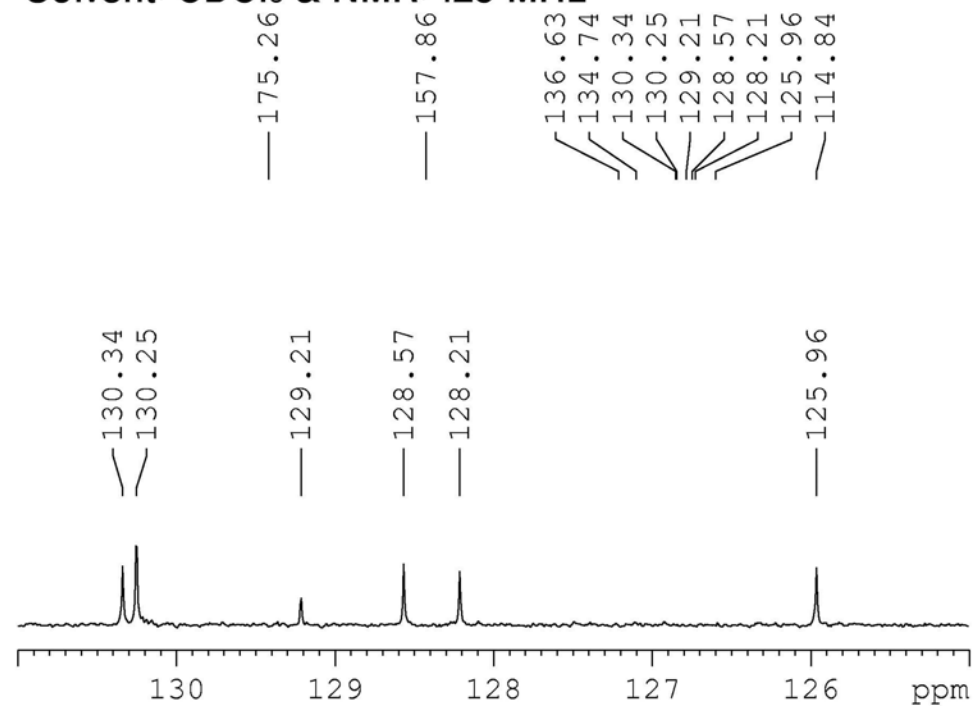

175.26  
157.86  
136.63  
134.74  
130.34  
130.25  
129.21  
128.57  
128.21  
125.96  
114.84  
77.26  
77.00  
76.75  
68.55  
55.76  
51.95  
39.94  
18.82

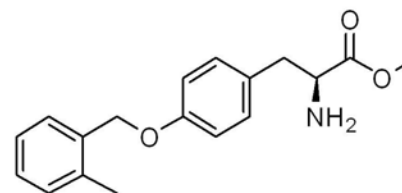

Chemical Formula: C<sub>18</sub>H<sub>21</sub>NO<sub>3</sub>  
Molecular Weight: 299.36

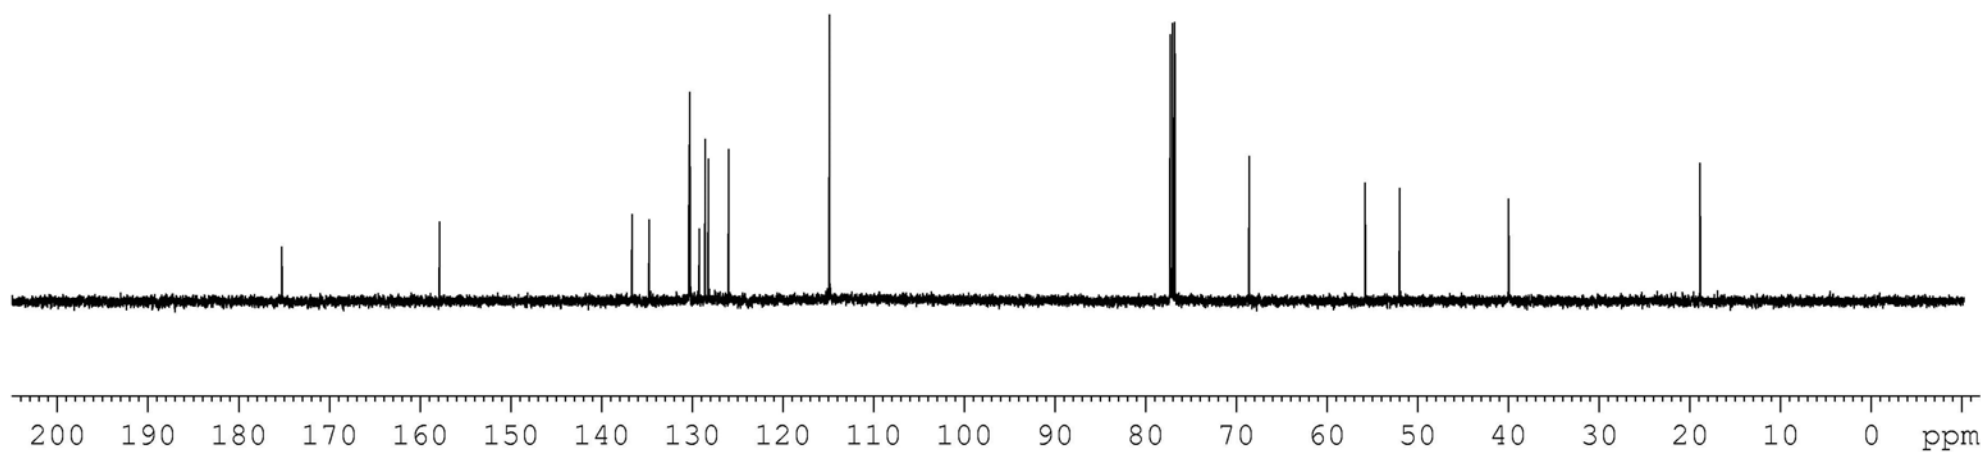

Solvent: CDCl<sub>3</sub> & NMR: 400 MHz

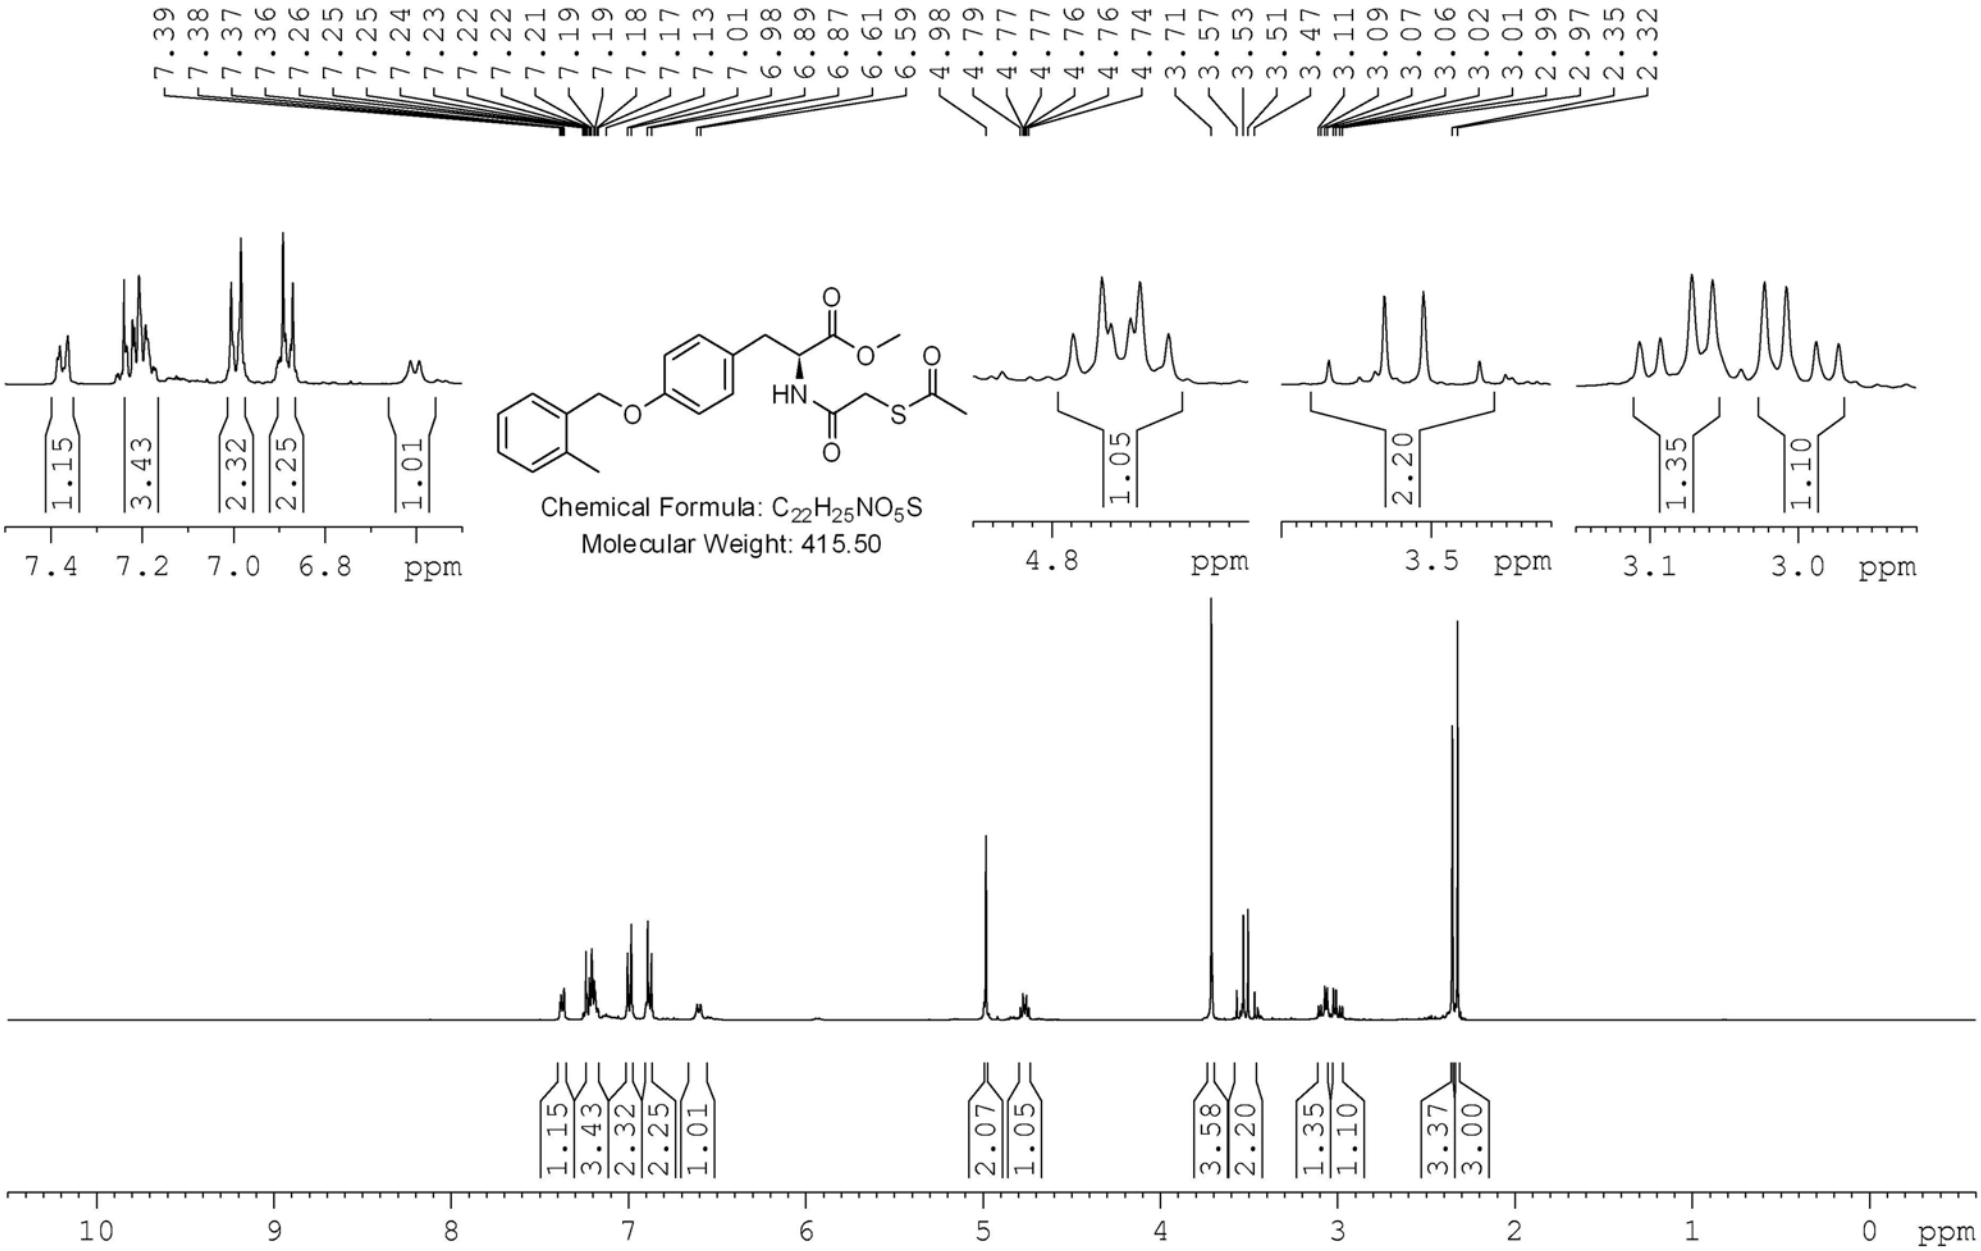

Solvent: CDCl<sub>3</sub> & NMR: 100 MHz

— 195.16  
— 171.59  
— 167.57  
— 158.02  
136.63  
134.69  
130.37  
130.30  
128.57  
128.26  
127.81  
126.00  
114.77

— 68.52  
53.49  
52.34  
36.72  
32.74  
30.13  
— 18.84

128.57  
128.26  
127.81  
126.00

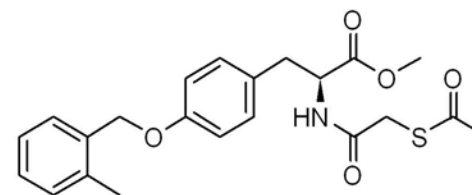

Chemical Formula: C<sub>22</sub>H<sub>25</sub>NO<sub>5</sub>S  
Molecular Weight: 415.50

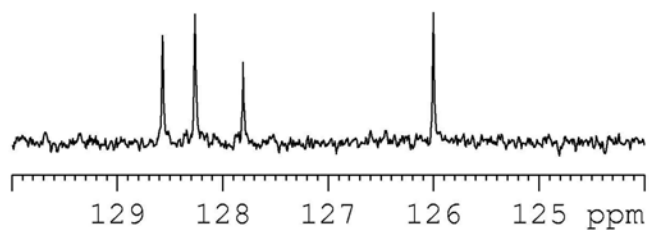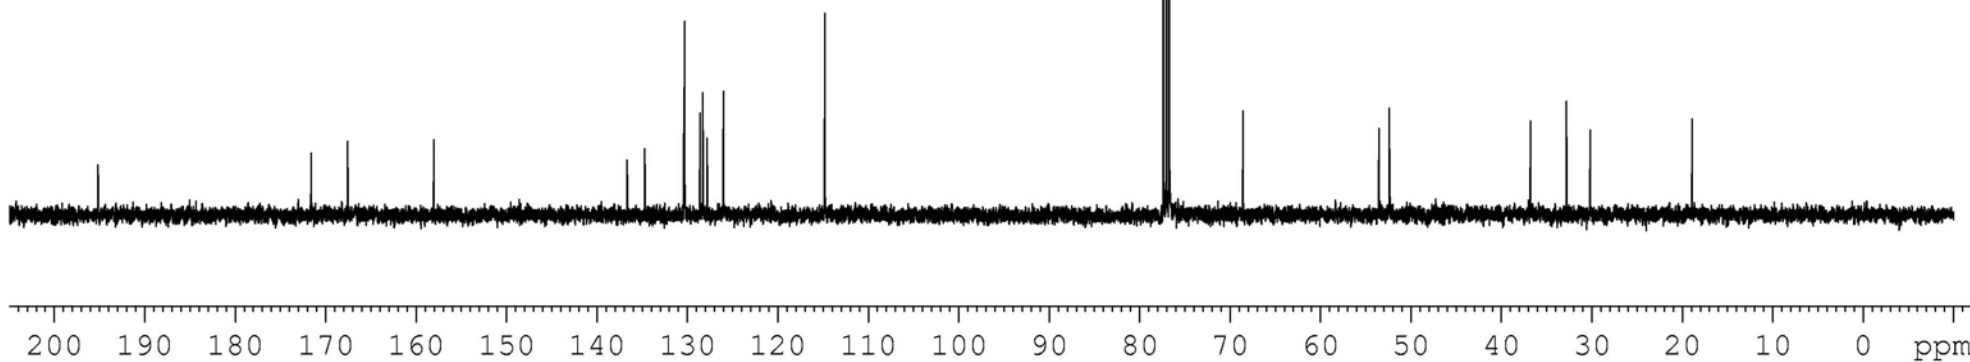

Solvent: CD<sub>3</sub>OD & NMR: 400 MHz

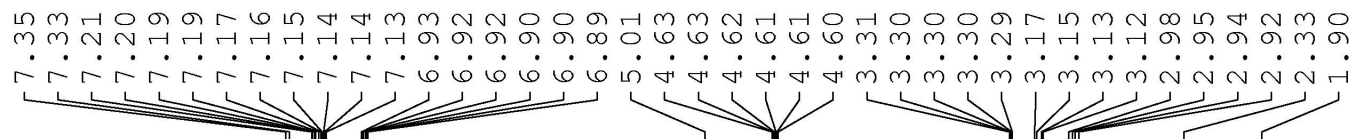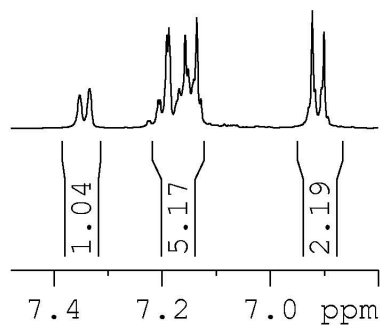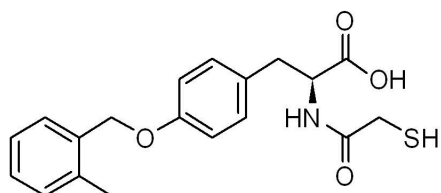

Chemical Formula: C<sub>19</sub>H<sub>21</sub>NO<sub>4</sub>S  
Molecular Weight: 359.44

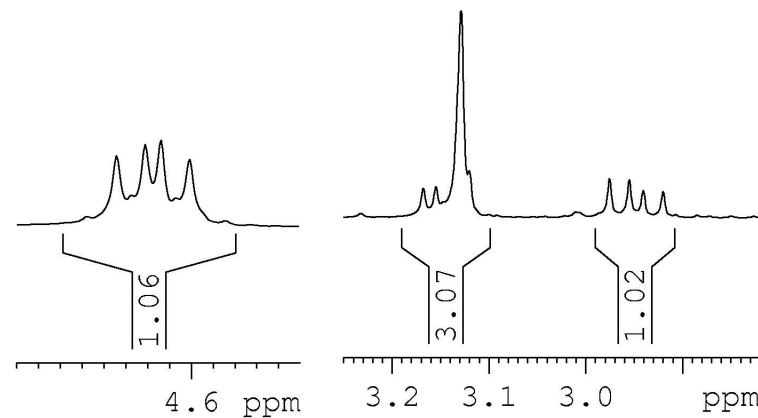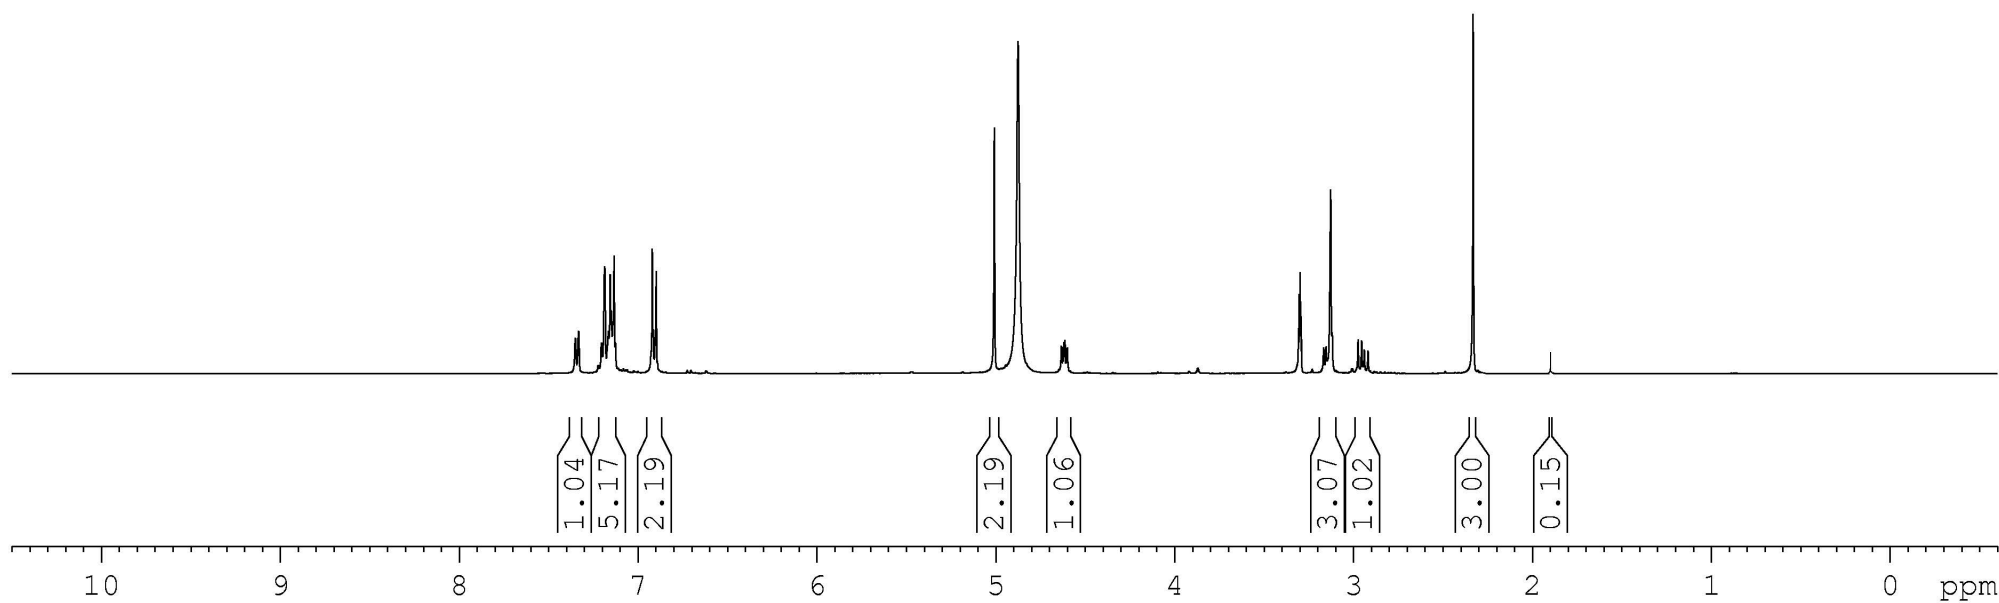

Solvent: CD<sub>3</sub>OD & NMR: 100 MHz

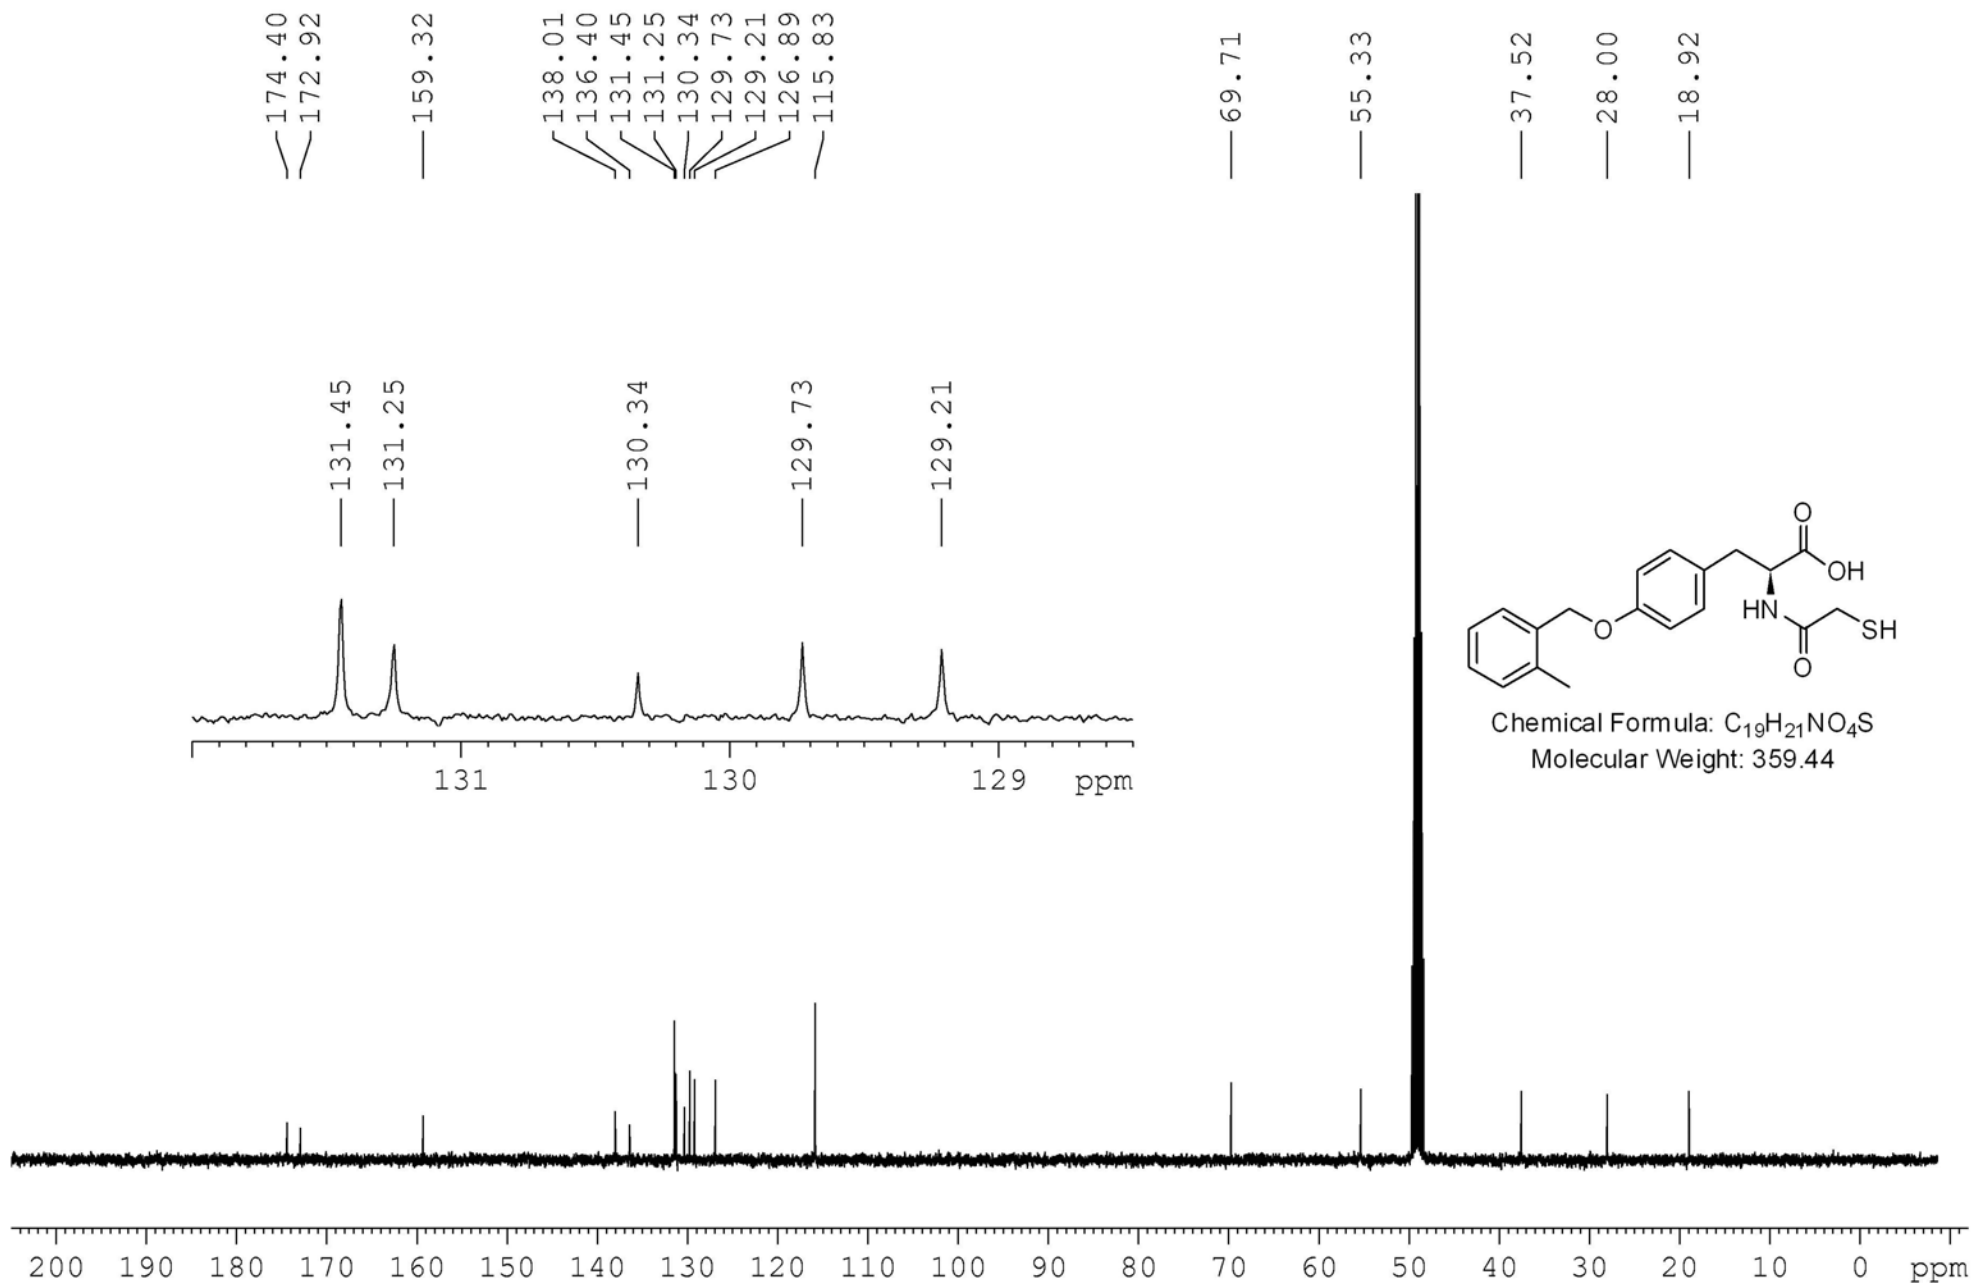

Solvent: CDCl<sub>3</sub> & NMR: 500 MHz

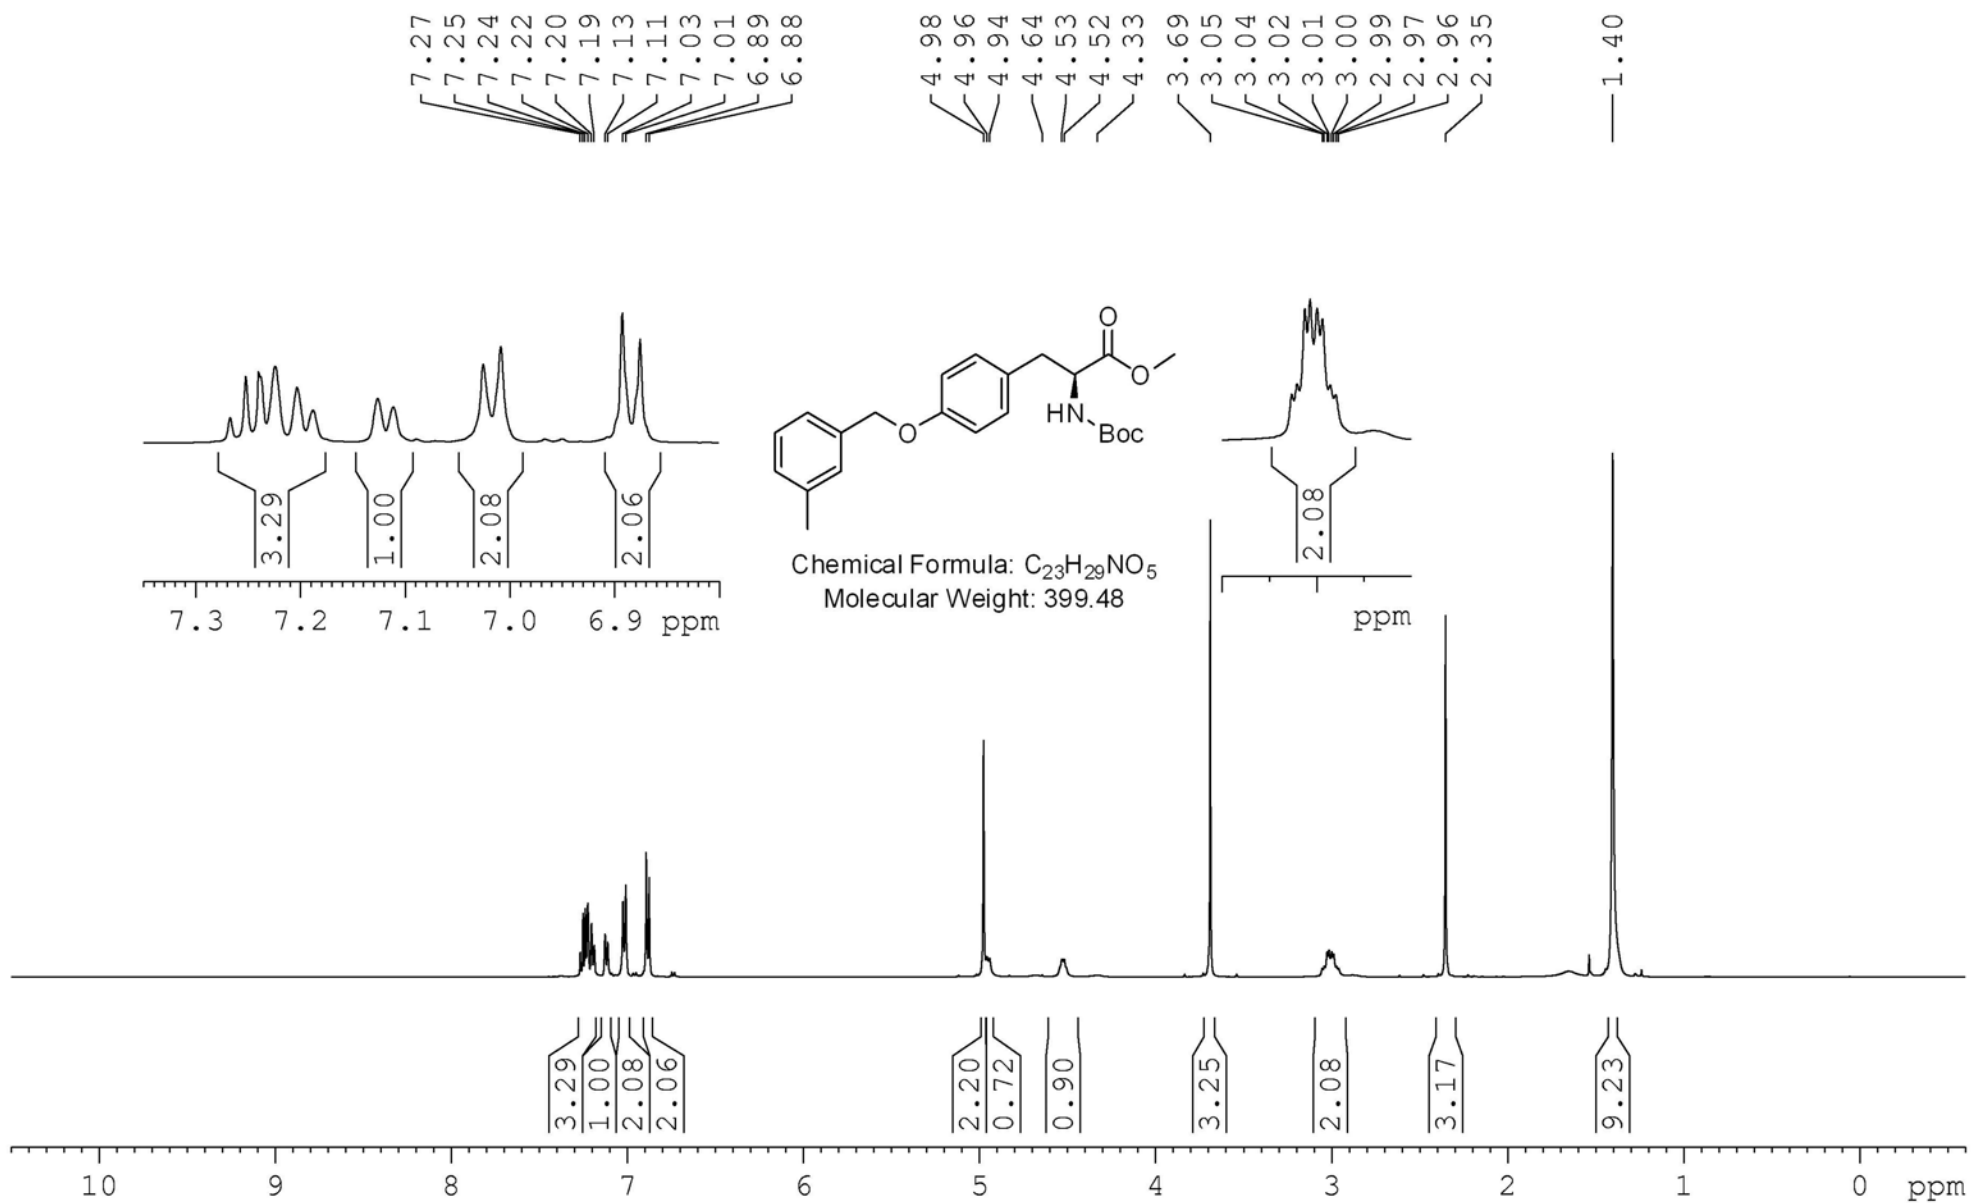

Solvent: CDCl<sub>3</sub> & NMR: 125 MHz

— 172.42

— 157.95

— 155.09

— 138.25

— 136.86

— 130.27

— 128.71

— 128.46

— 128.21

— 128.16

— 124.56

— 114.88

— 79.88

— 77.25

— 77.00

— 76.75

— 70.06

— 54.50

— 52.15

— 37.46

— 28.27

— 21.38

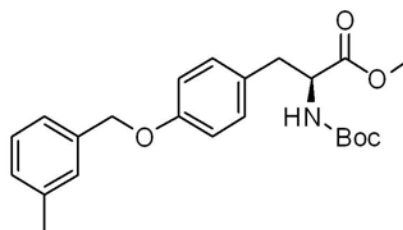

Chemical Formula: C<sub>23</sub>H<sub>29</sub>NO<sub>5</sub>  
Molecular Weight: 399.48

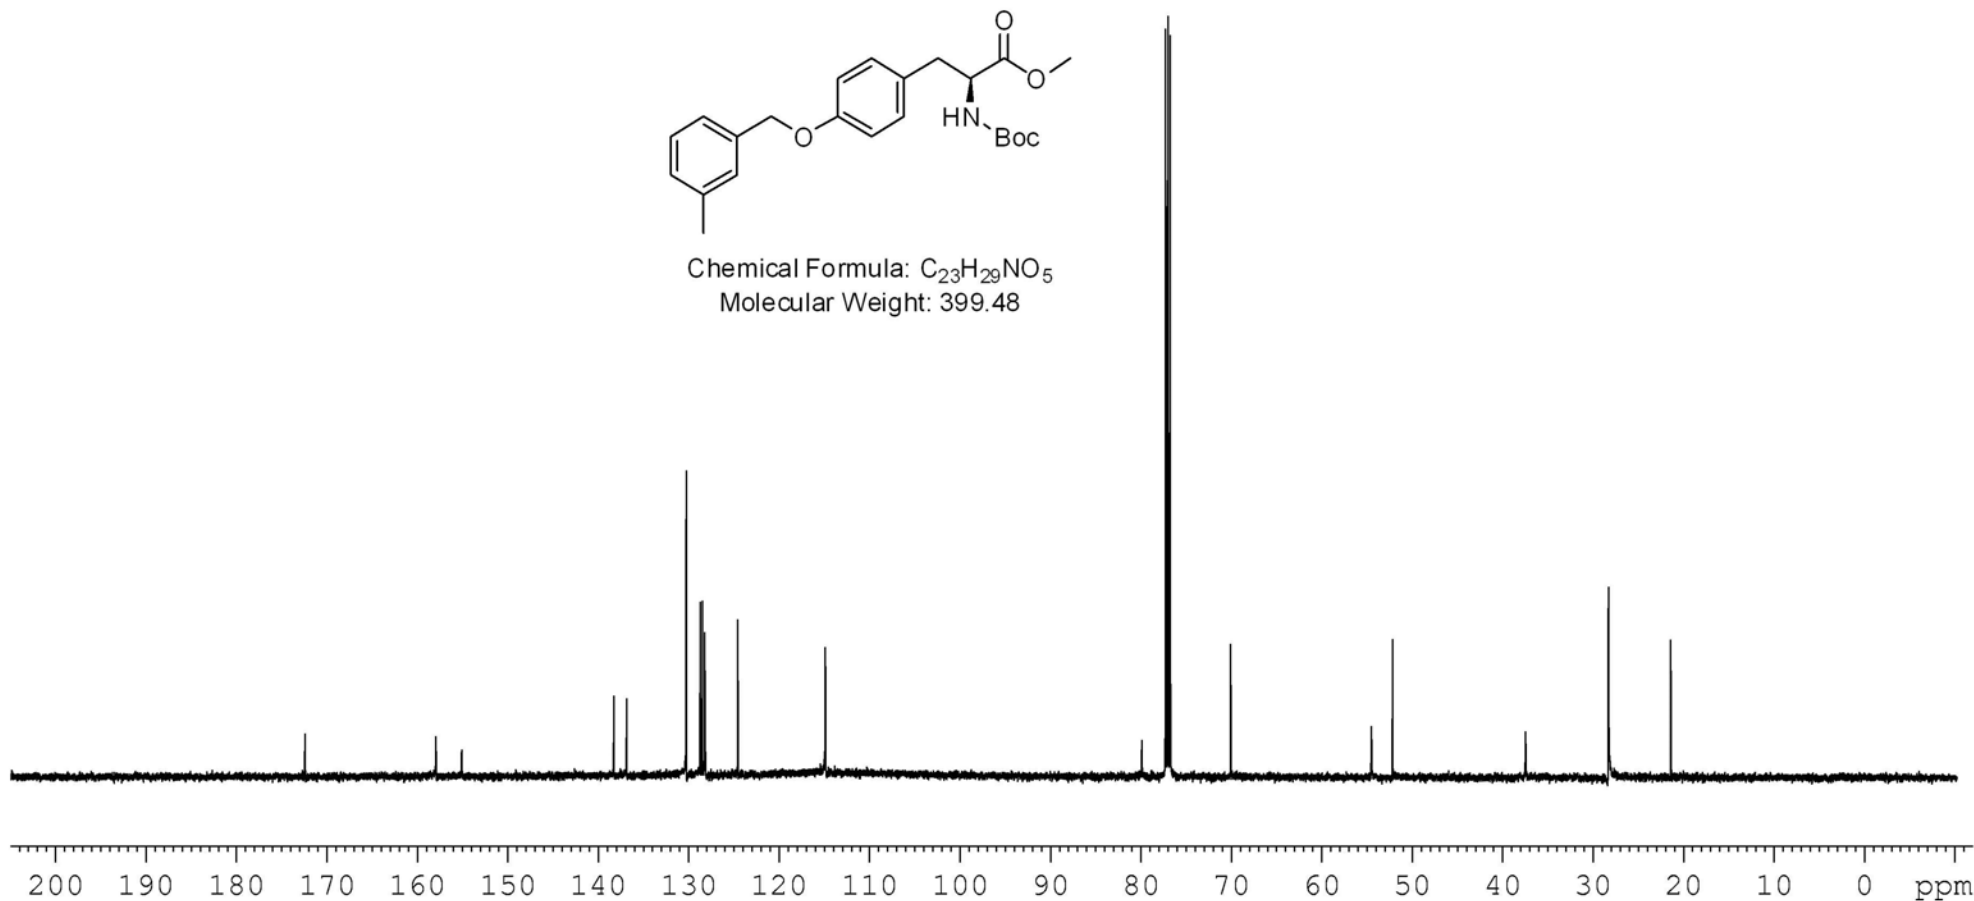

Solvent: CDCl<sub>3</sub> & NMR: 500 MHz

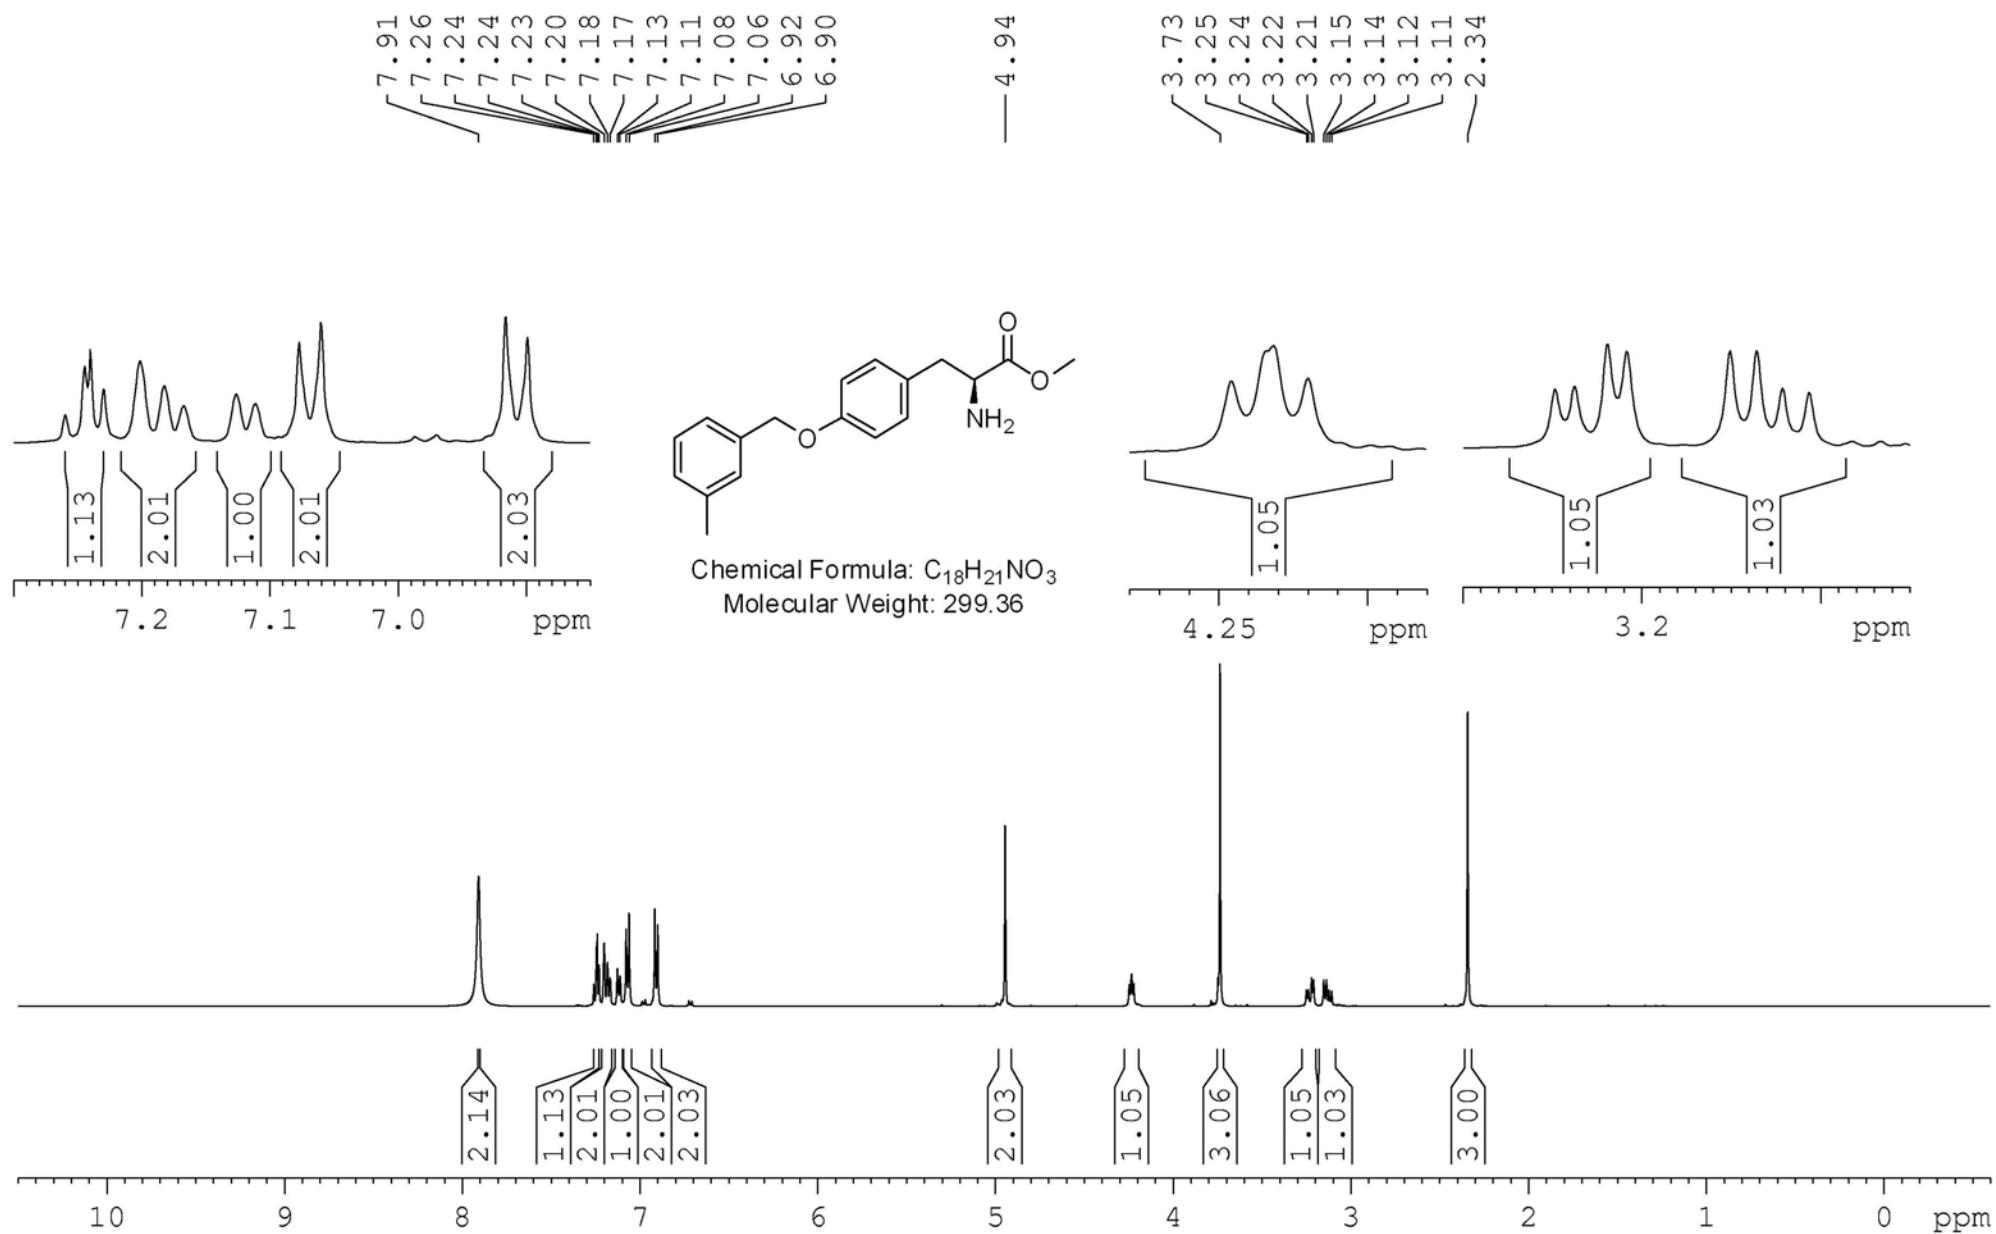

Solvent: CDCl<sub>3</sub> & NMR: 125 MHz

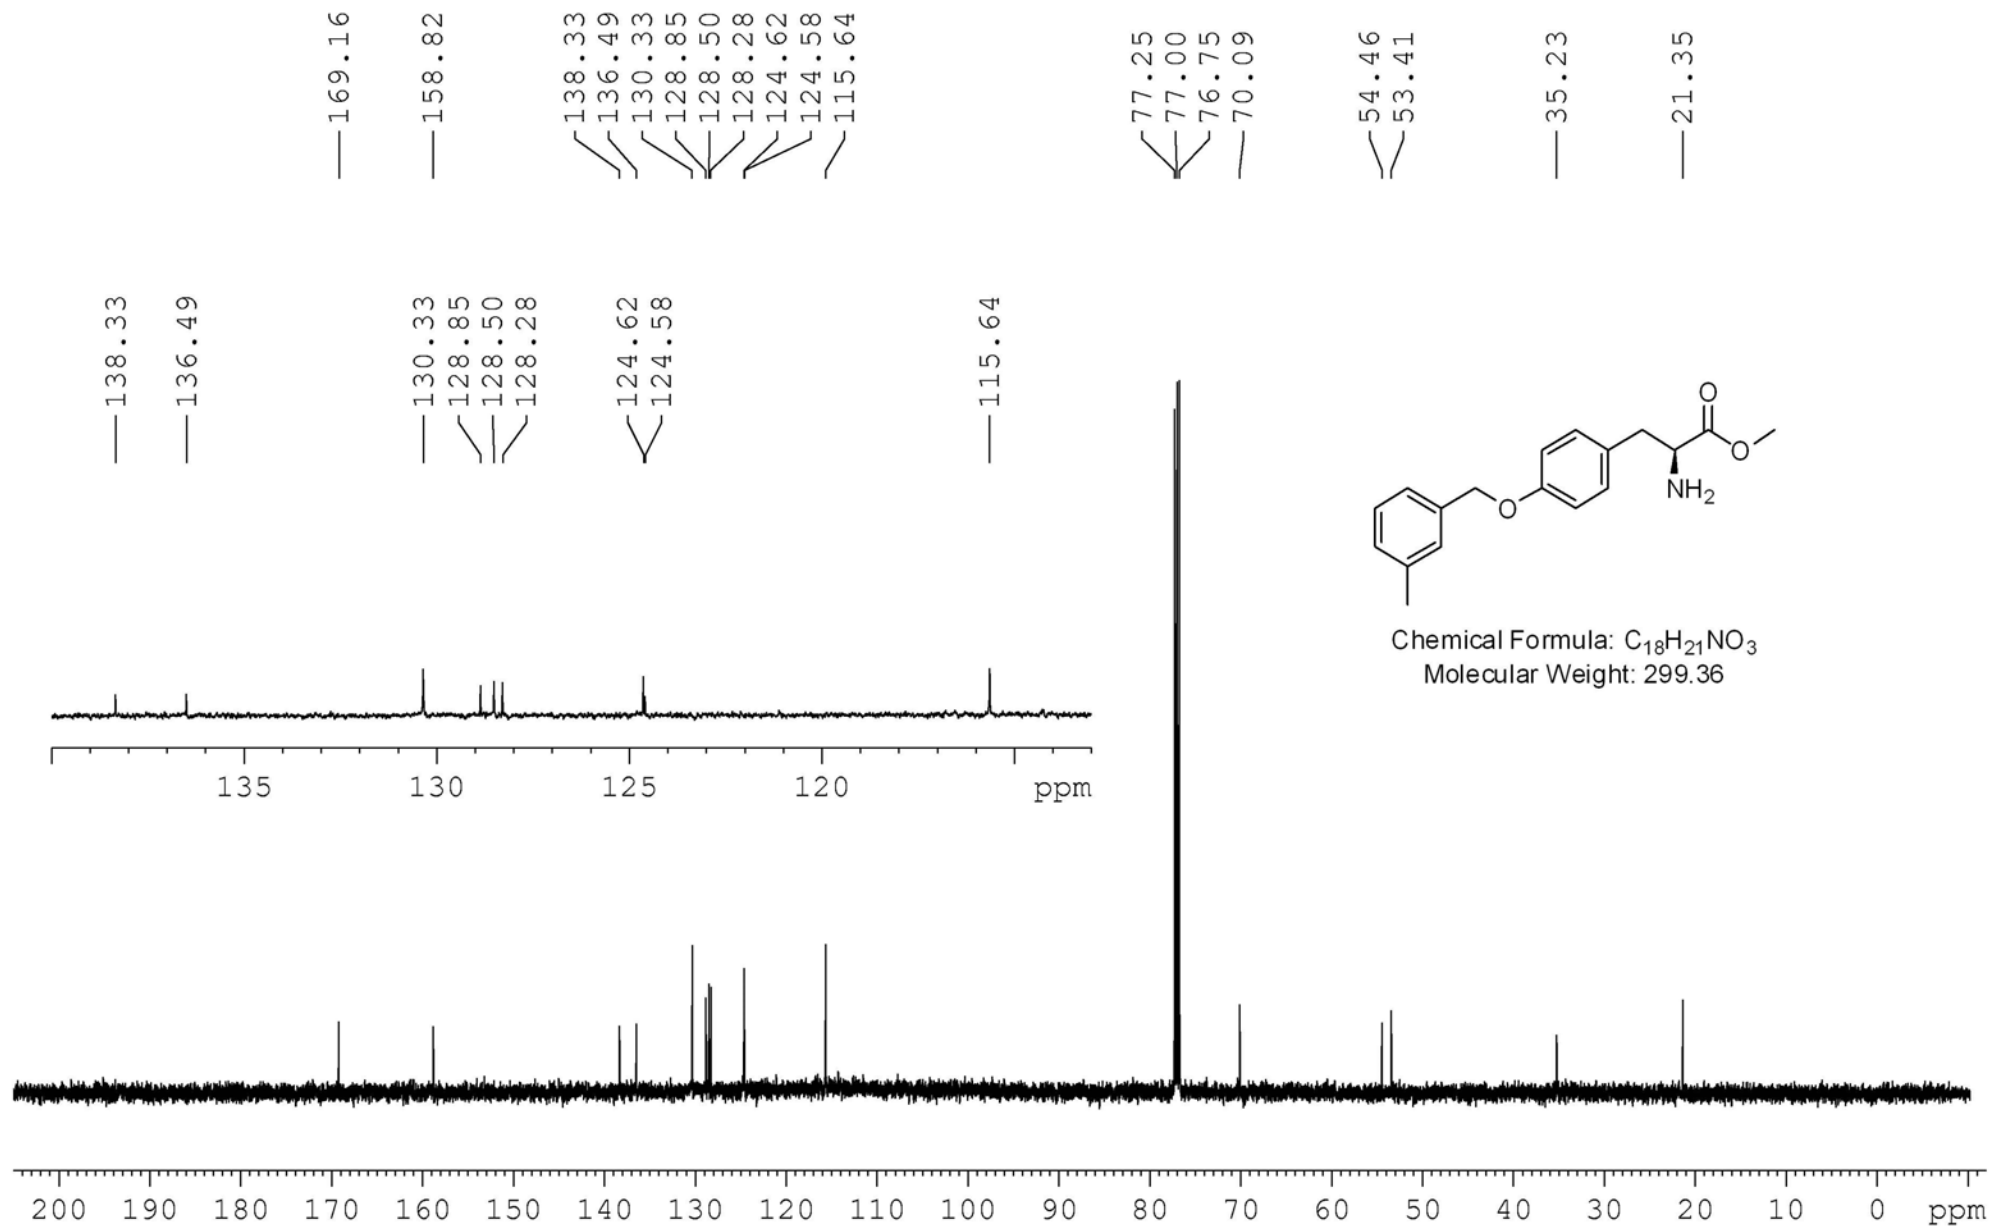

Solvent: CDCl<sub>3</sub> & NMR: 500 MHz

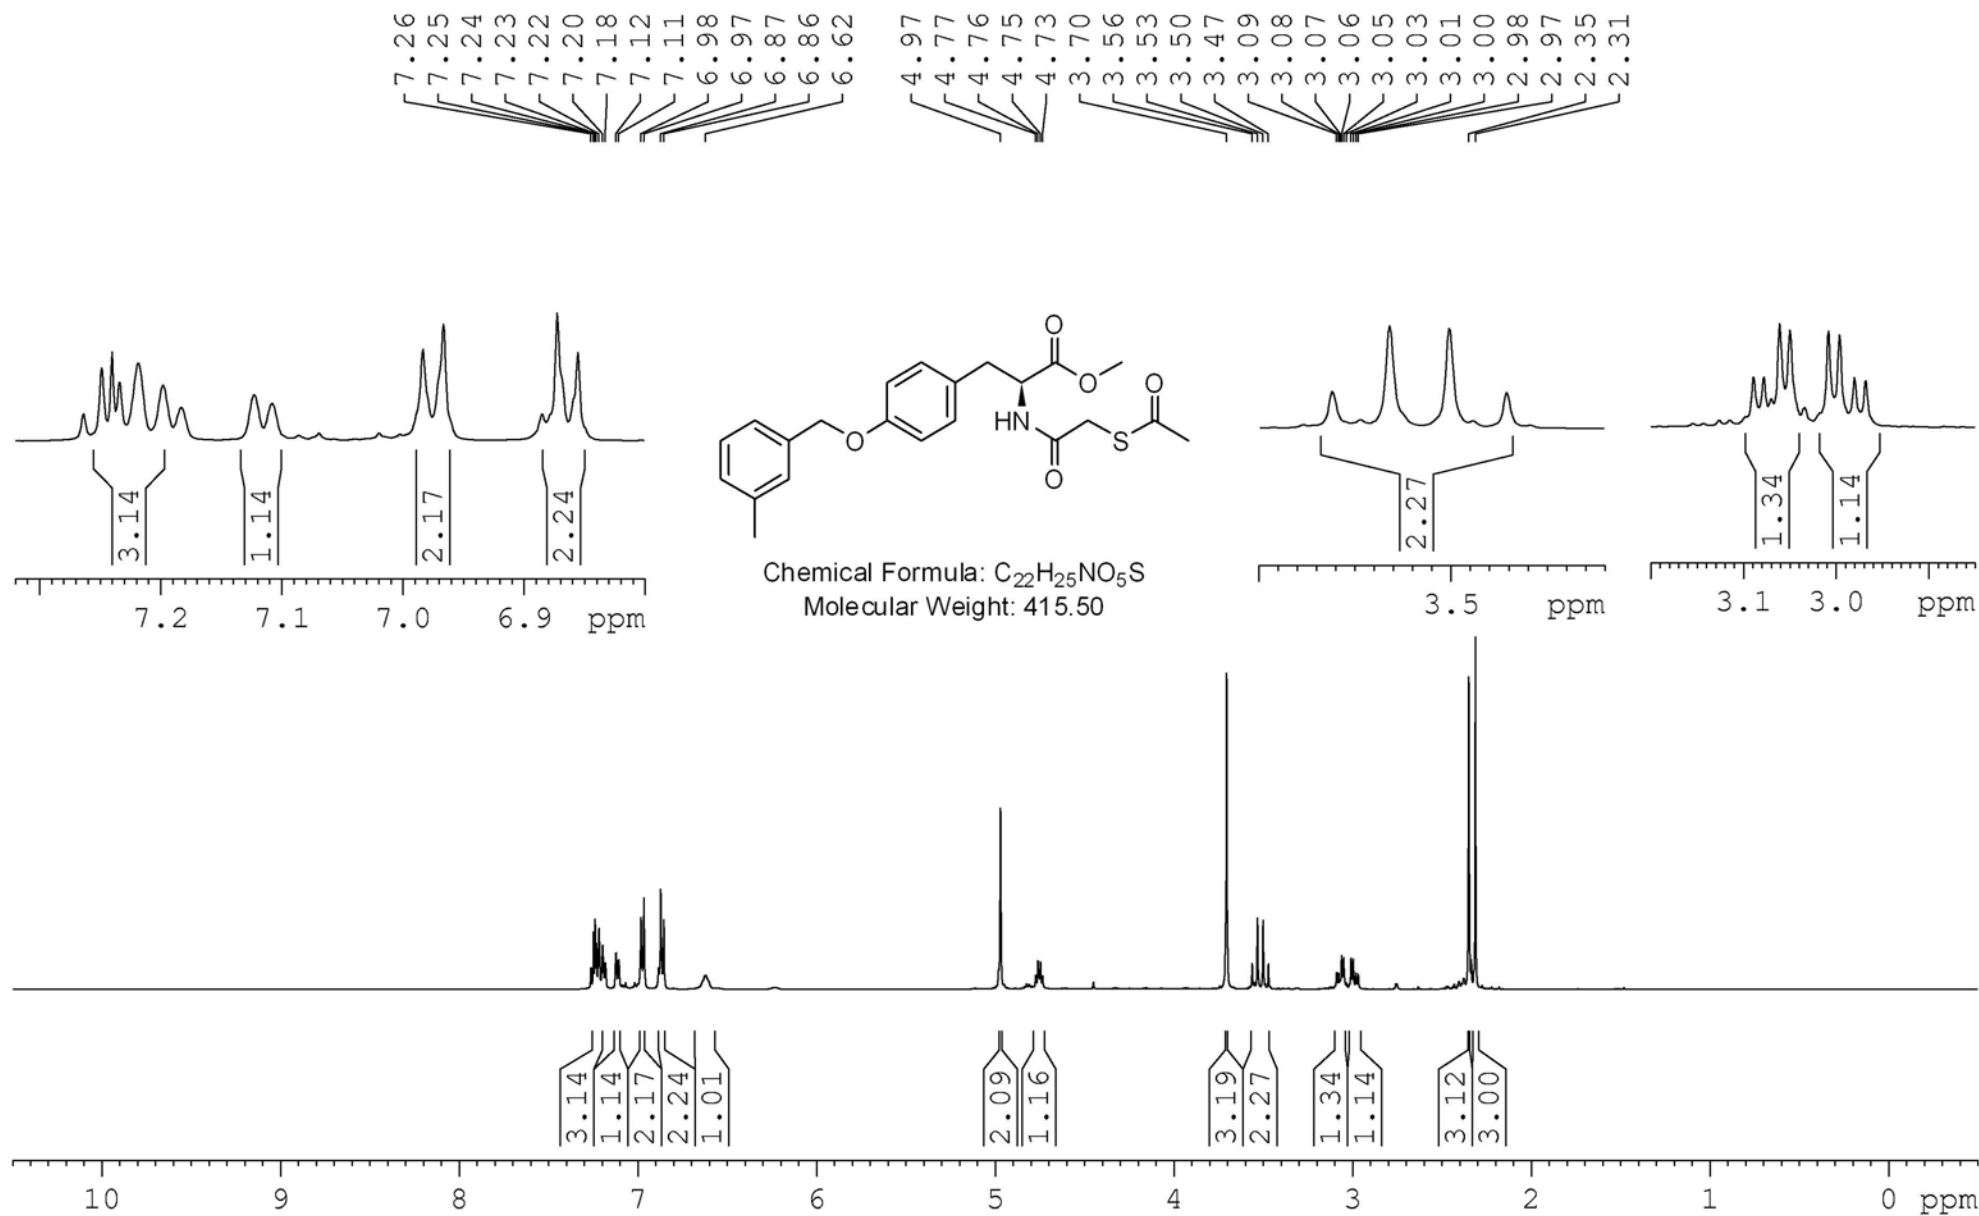

Solvent: CDCl<sub>3</sub> & NMR: 125 MHz

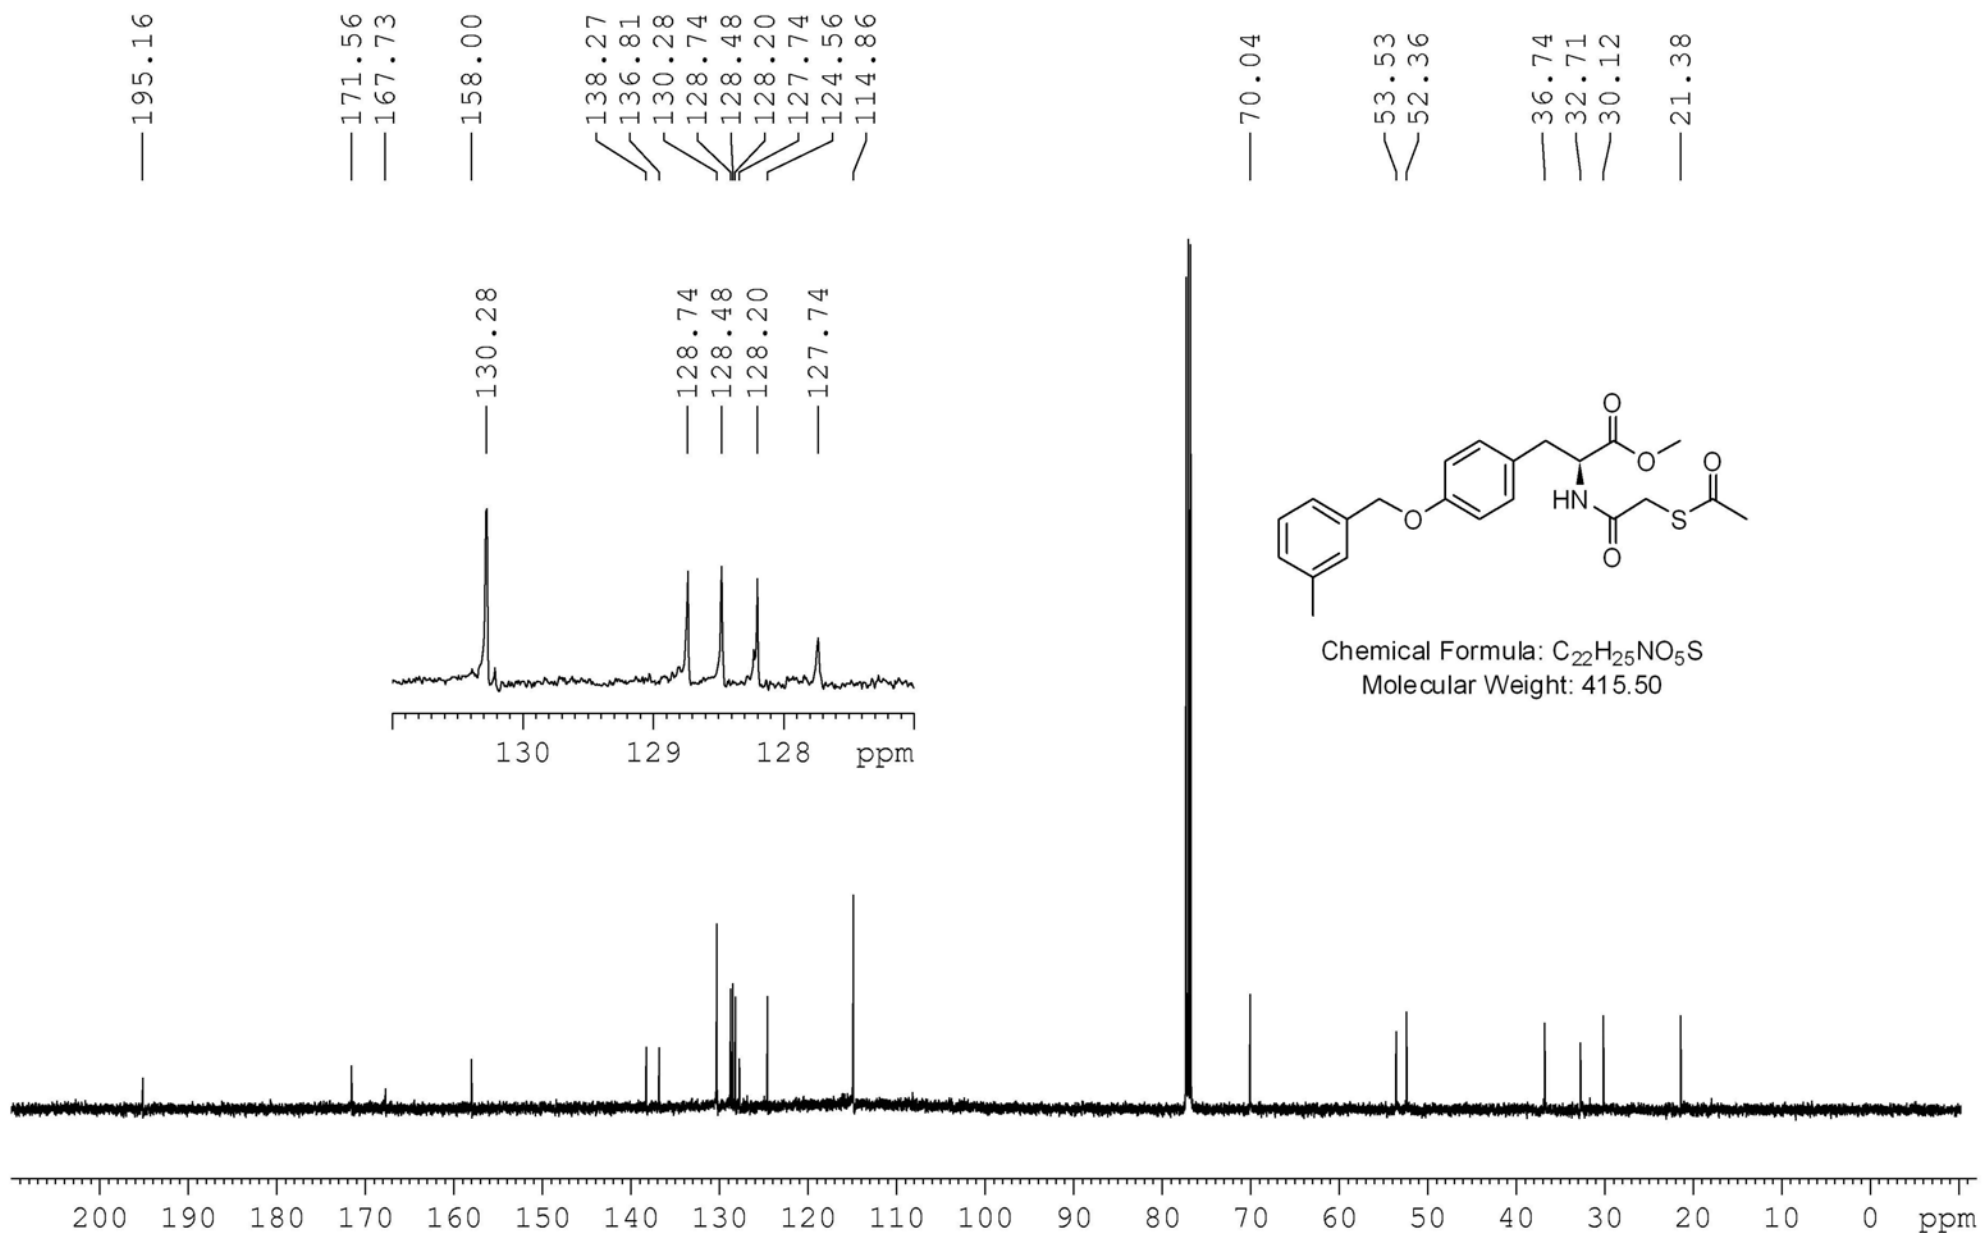

Solvent: CD<sub>3</sub>OD & NMR: 400 MHz

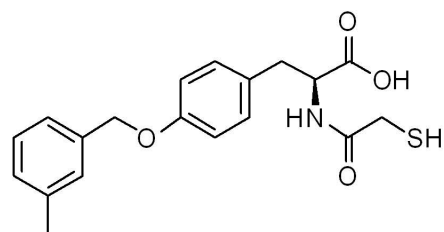

Chemical Formula: C<sub>19</sub>H<sub>21</sub>NO<sub>4</sub>S  
Molecular Weight: 359.44

7.22  
7.20  
7.19  
7.14  
7.13  
7.12  
7.12  
7.11  
7.09  
6.90  
6.90  
6.88  
6.88

4.99  
4.62  
4.61  
4.60  
4.60  
4.59  
3.31  
3.30  
3.30  
3.30  
3.29  
3.16  
3.15  
3.12  
3.11  
2.96  
2.94  
2.93  
2.91  
2.33  
1.89

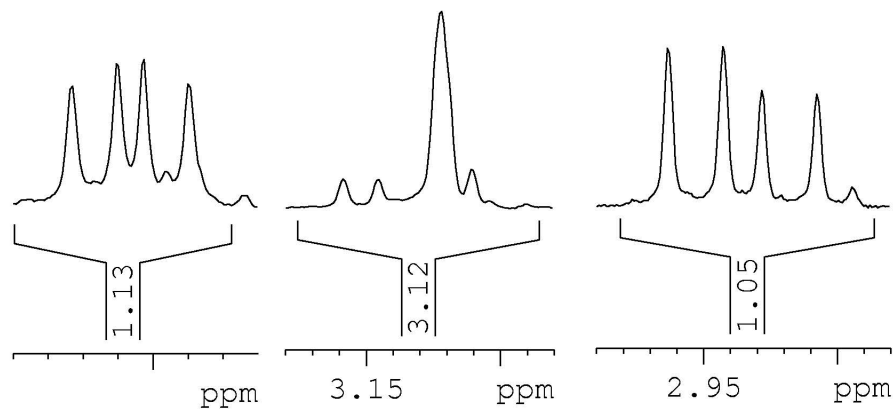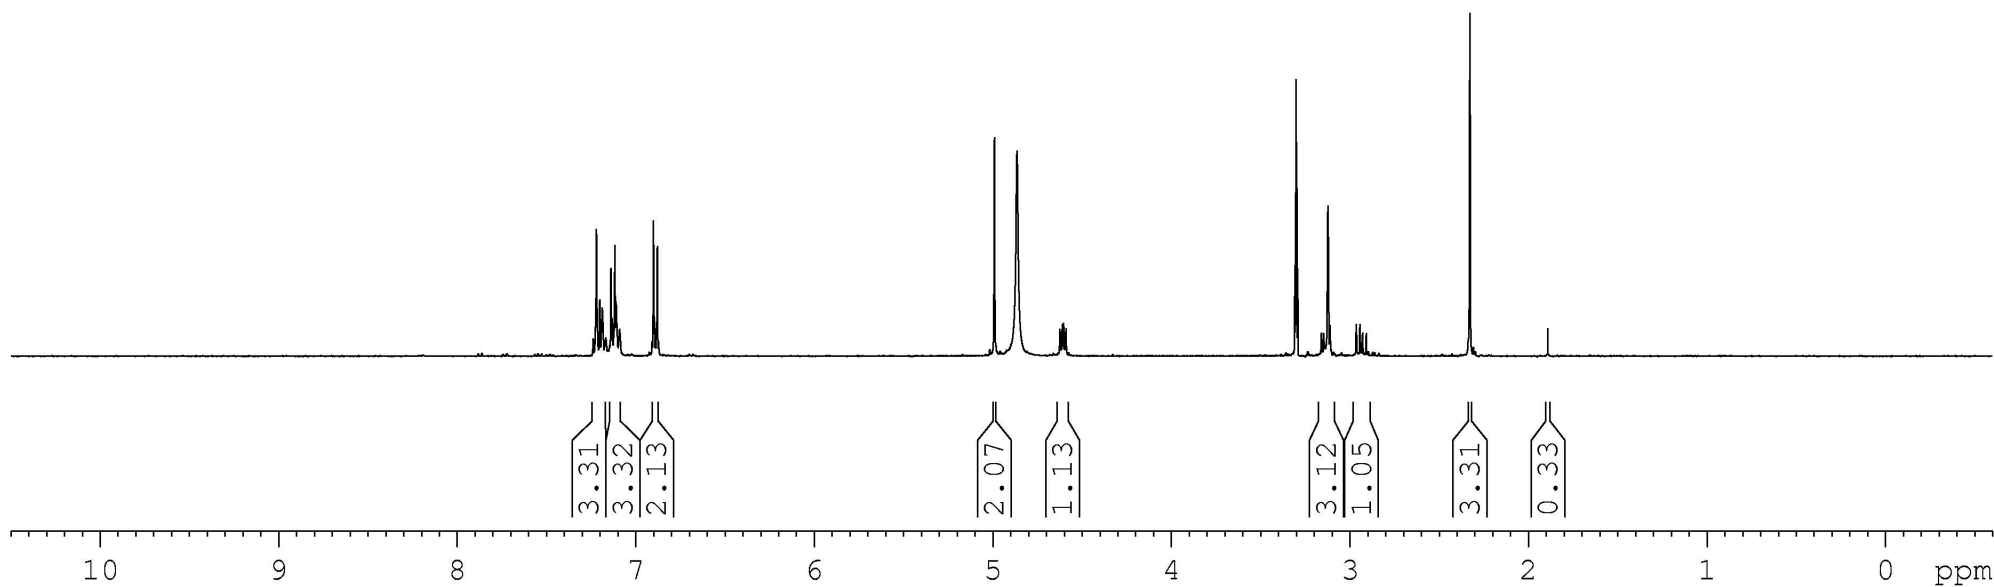

Solvent: CD<sub>3</sub>OD & NMR: 100 MHz

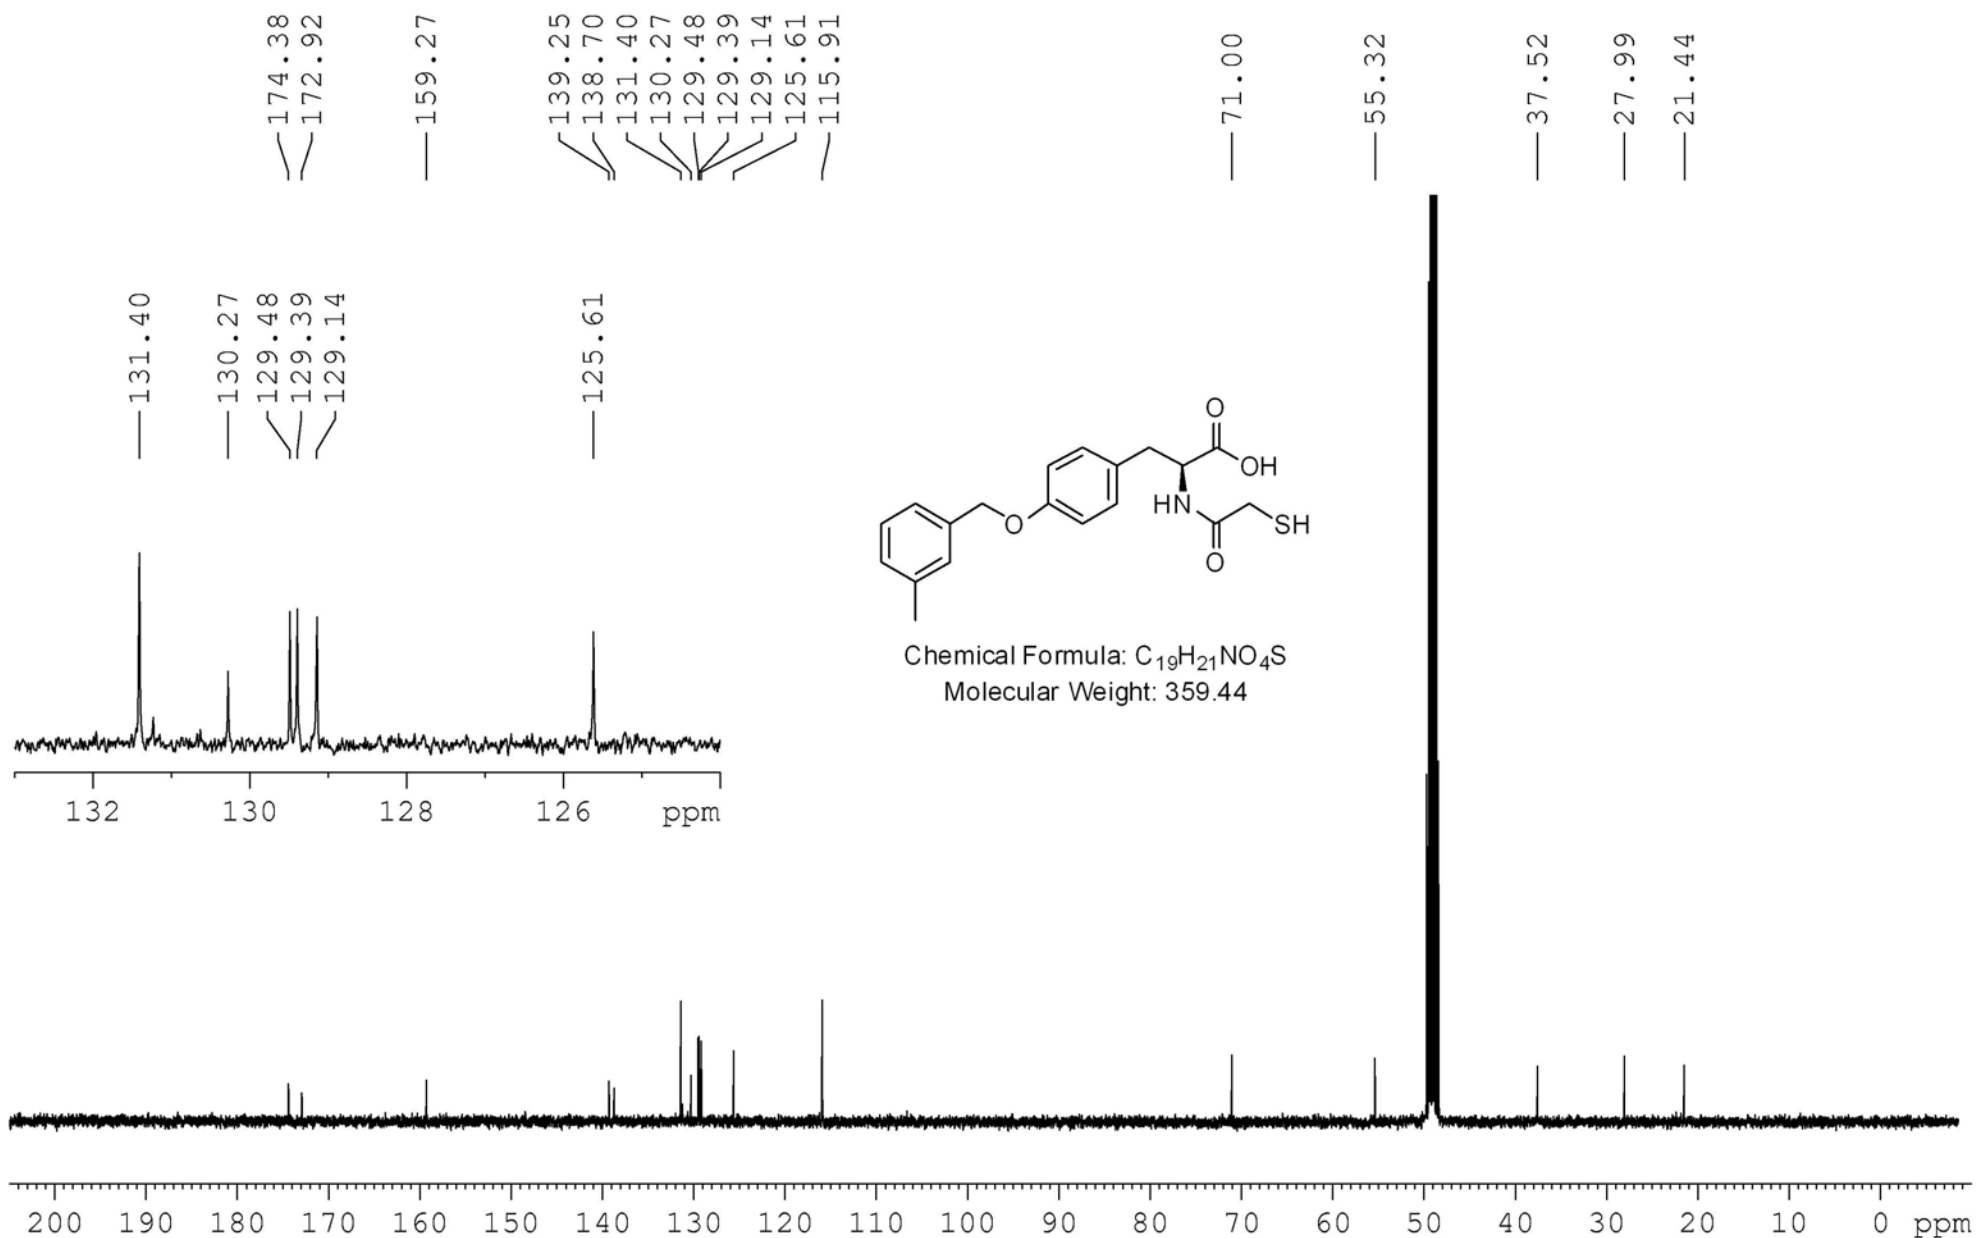

Solvent: CDCl<sub>3</sub> & NMR: 400 MHz

7.30  
7.28  
7.24  
7.18  
7.16  
7.02  
7.00  
6.88  
6.86

4.97  
4.94  
4.79  
4.68  
4.63  
4.53  
4.51

— 3.68

3.02  
3.00  
2.98

— 2.34

— 1.40

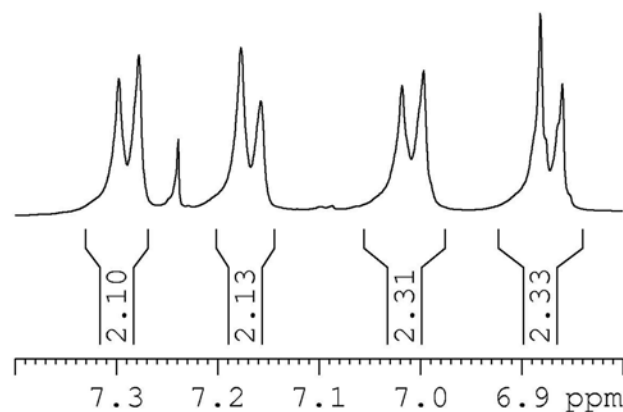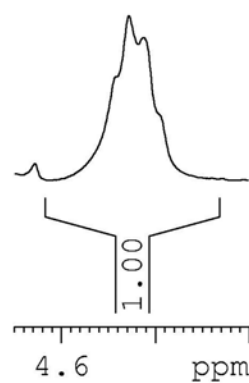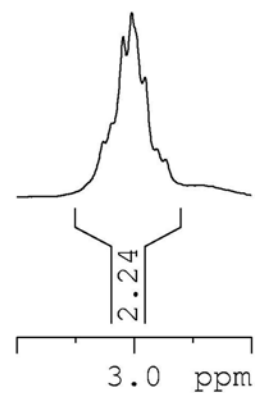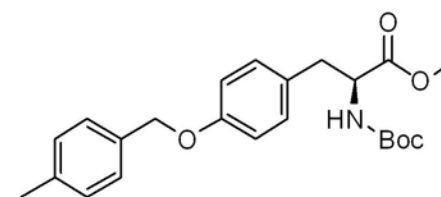

Chemical Formula: C<sub>23</sub>H<sub>29</sub>NO<sub>5</sub>  
Molecular Weight: 399.48

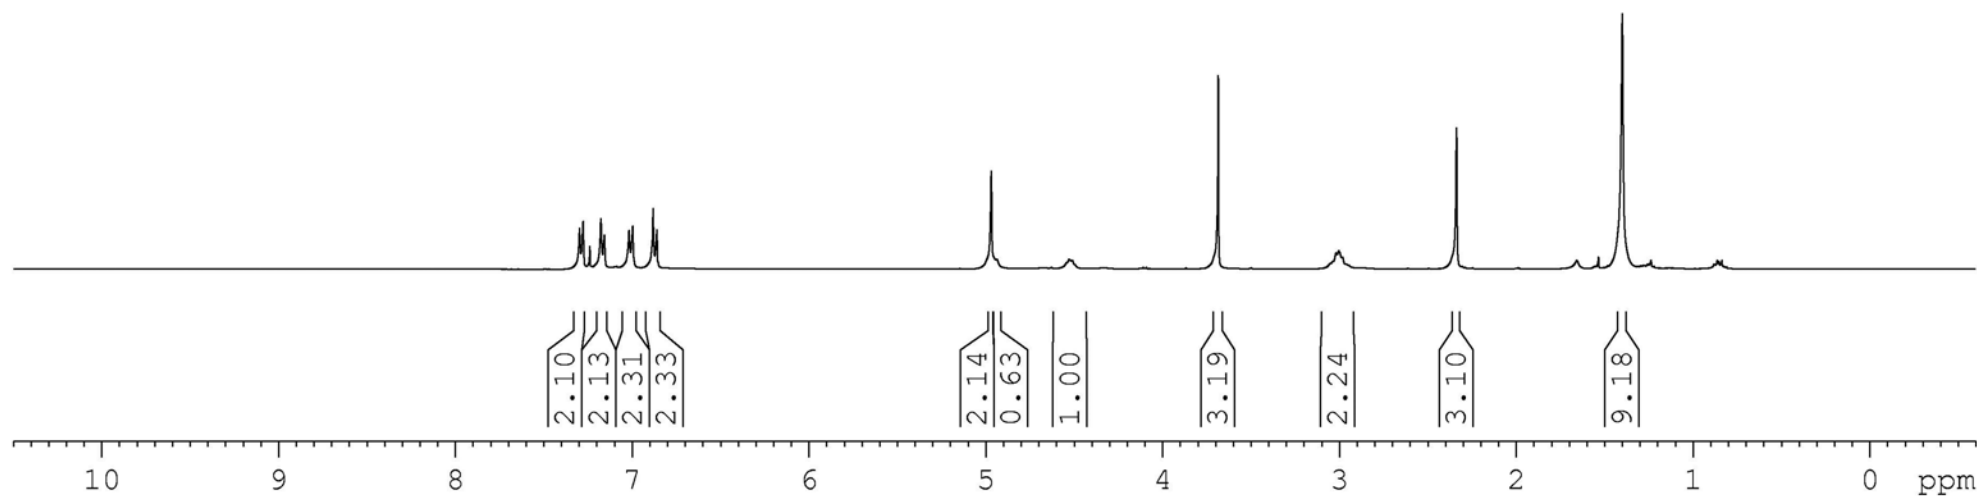

Solvent: CDCl<sub>3</sub> & NMR: 100 MHz

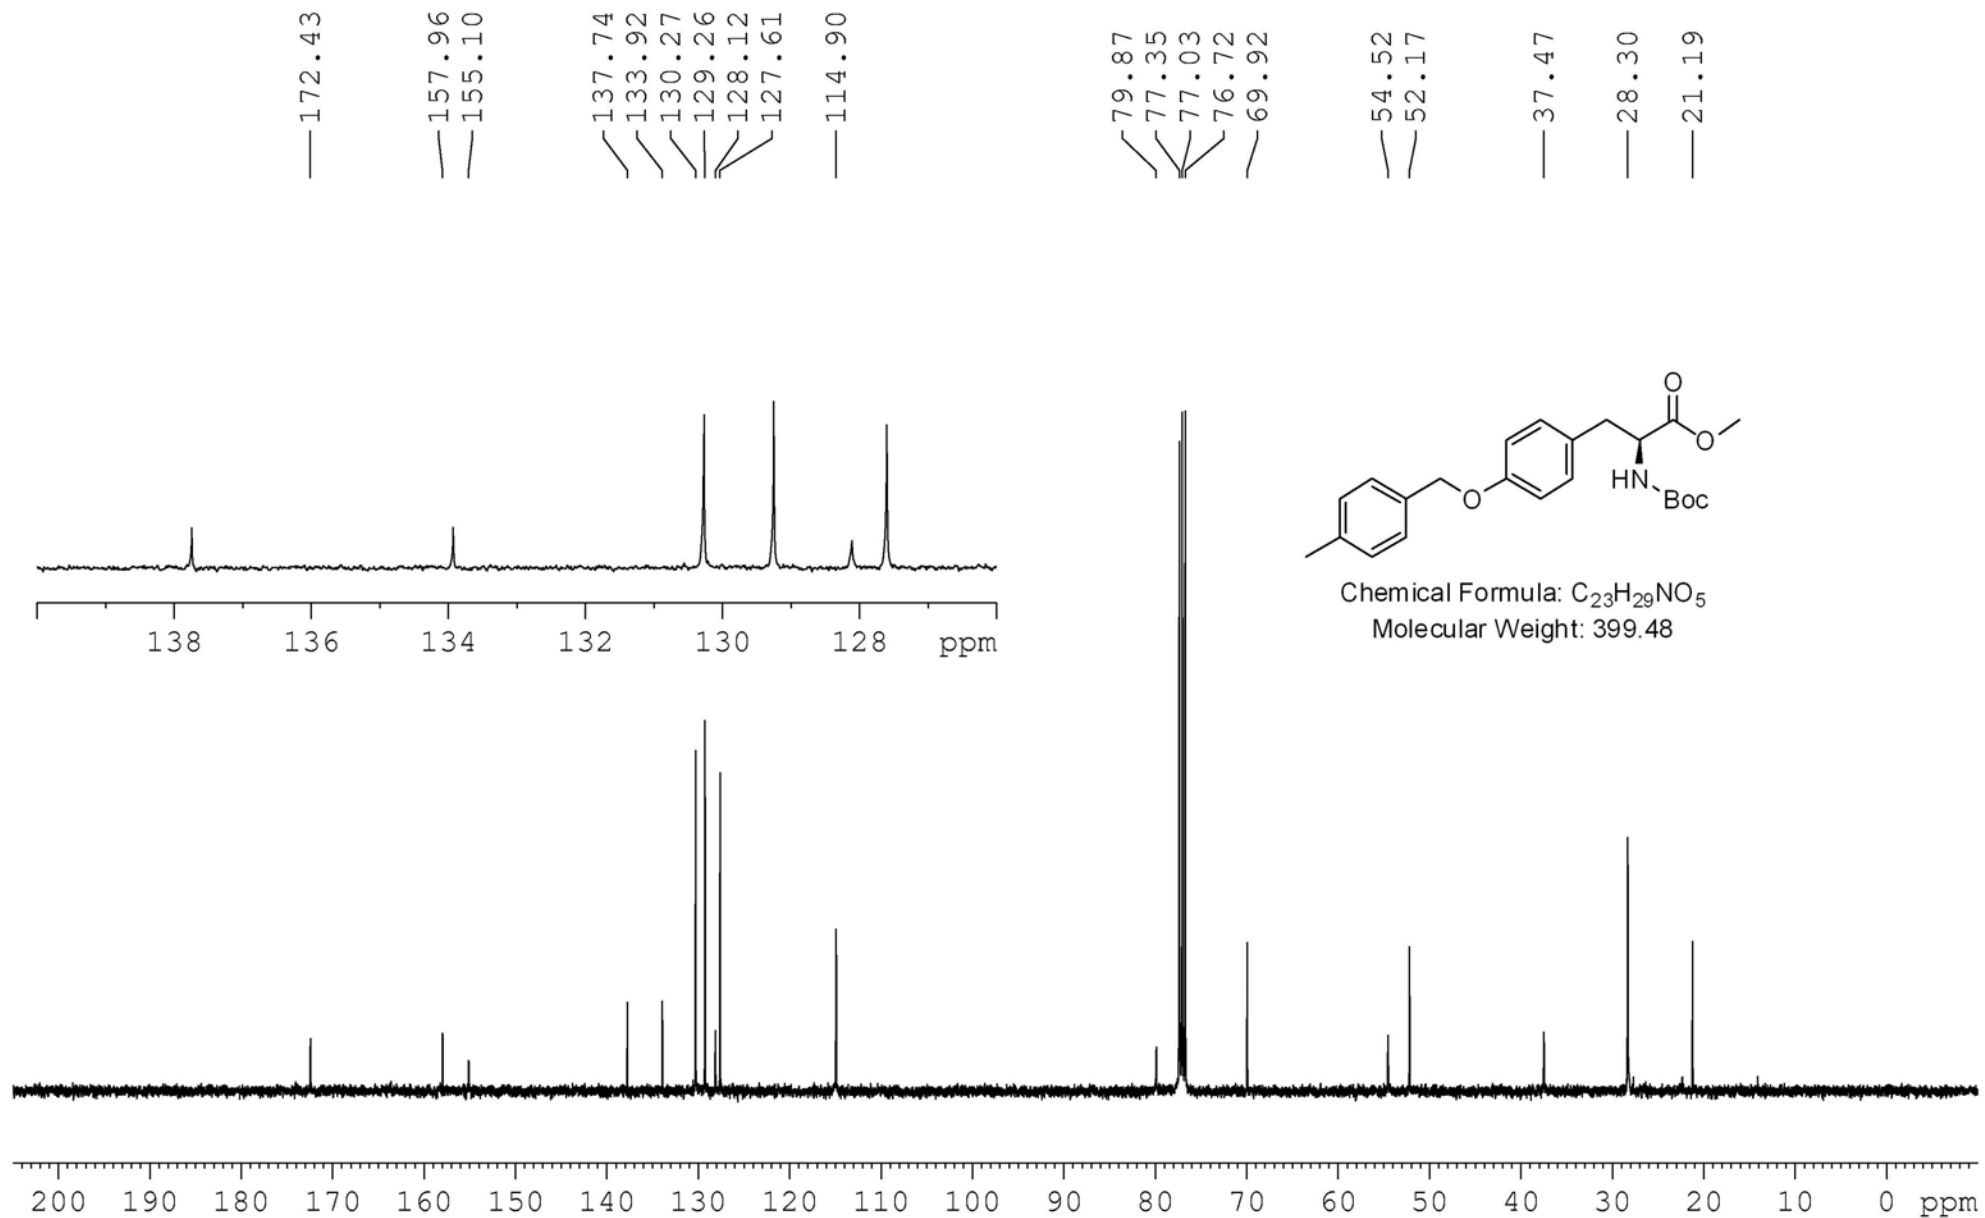

Solvent: CDCl<sub>3</sub> & NMR: 500 MHz

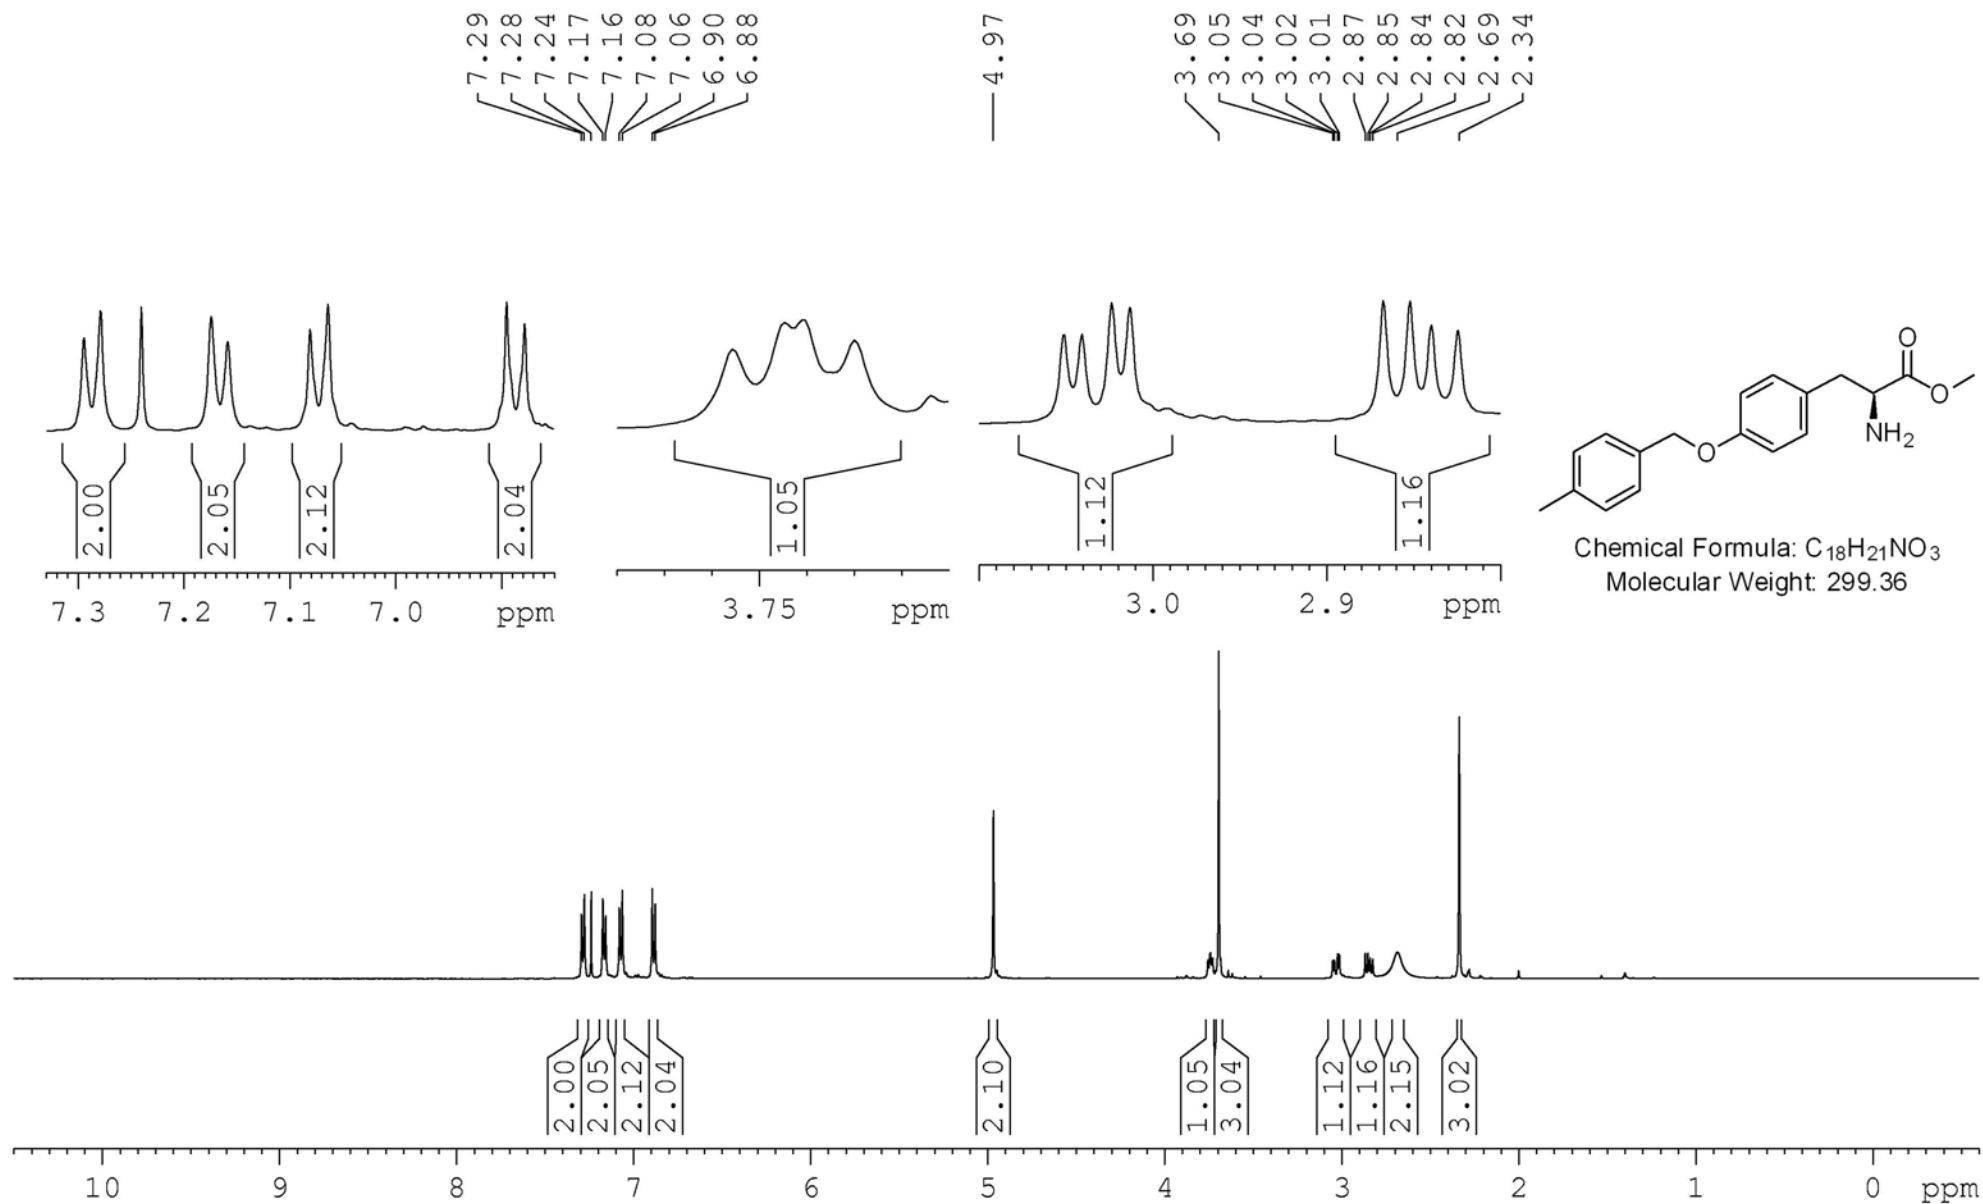

Chemical structure of the compound is shown above the spectrum:

COC(=O)[C@H](N)Cc1ccc(OCC2=CC=C(C)C=C2)cc1

Chemical Formula: C<sub>18</sub>H<sub>21</sub>NO<sub>3</sub>  
Molecular Weight: 299.36

The spectrum displays the following chemical shifts (ppm):

| Chemical Shift (ppm) |
|----------------------|
| 174.50               |
| 157.96               |
| 137.74               |
| 133.90               |
| 130.27               |
| 129.25               |
| 128.60               |
| 127.60               |
| 115.04               |
| 77.25                |
| 77.00                |
| 76.75                |
| 69.93                |
| 55.55                |
| 52.16                |
| 39.35                |
| 21.17                |

13C NMR spectrum (CDCl<sub>3</sub>) showing peaks corresponding to the chemical structure. The x-axis represents the chemical shift in ppm, ranging from 0 to 200.

Solvent: CDCl<sub>3</sub> & NMR: 500 MHz

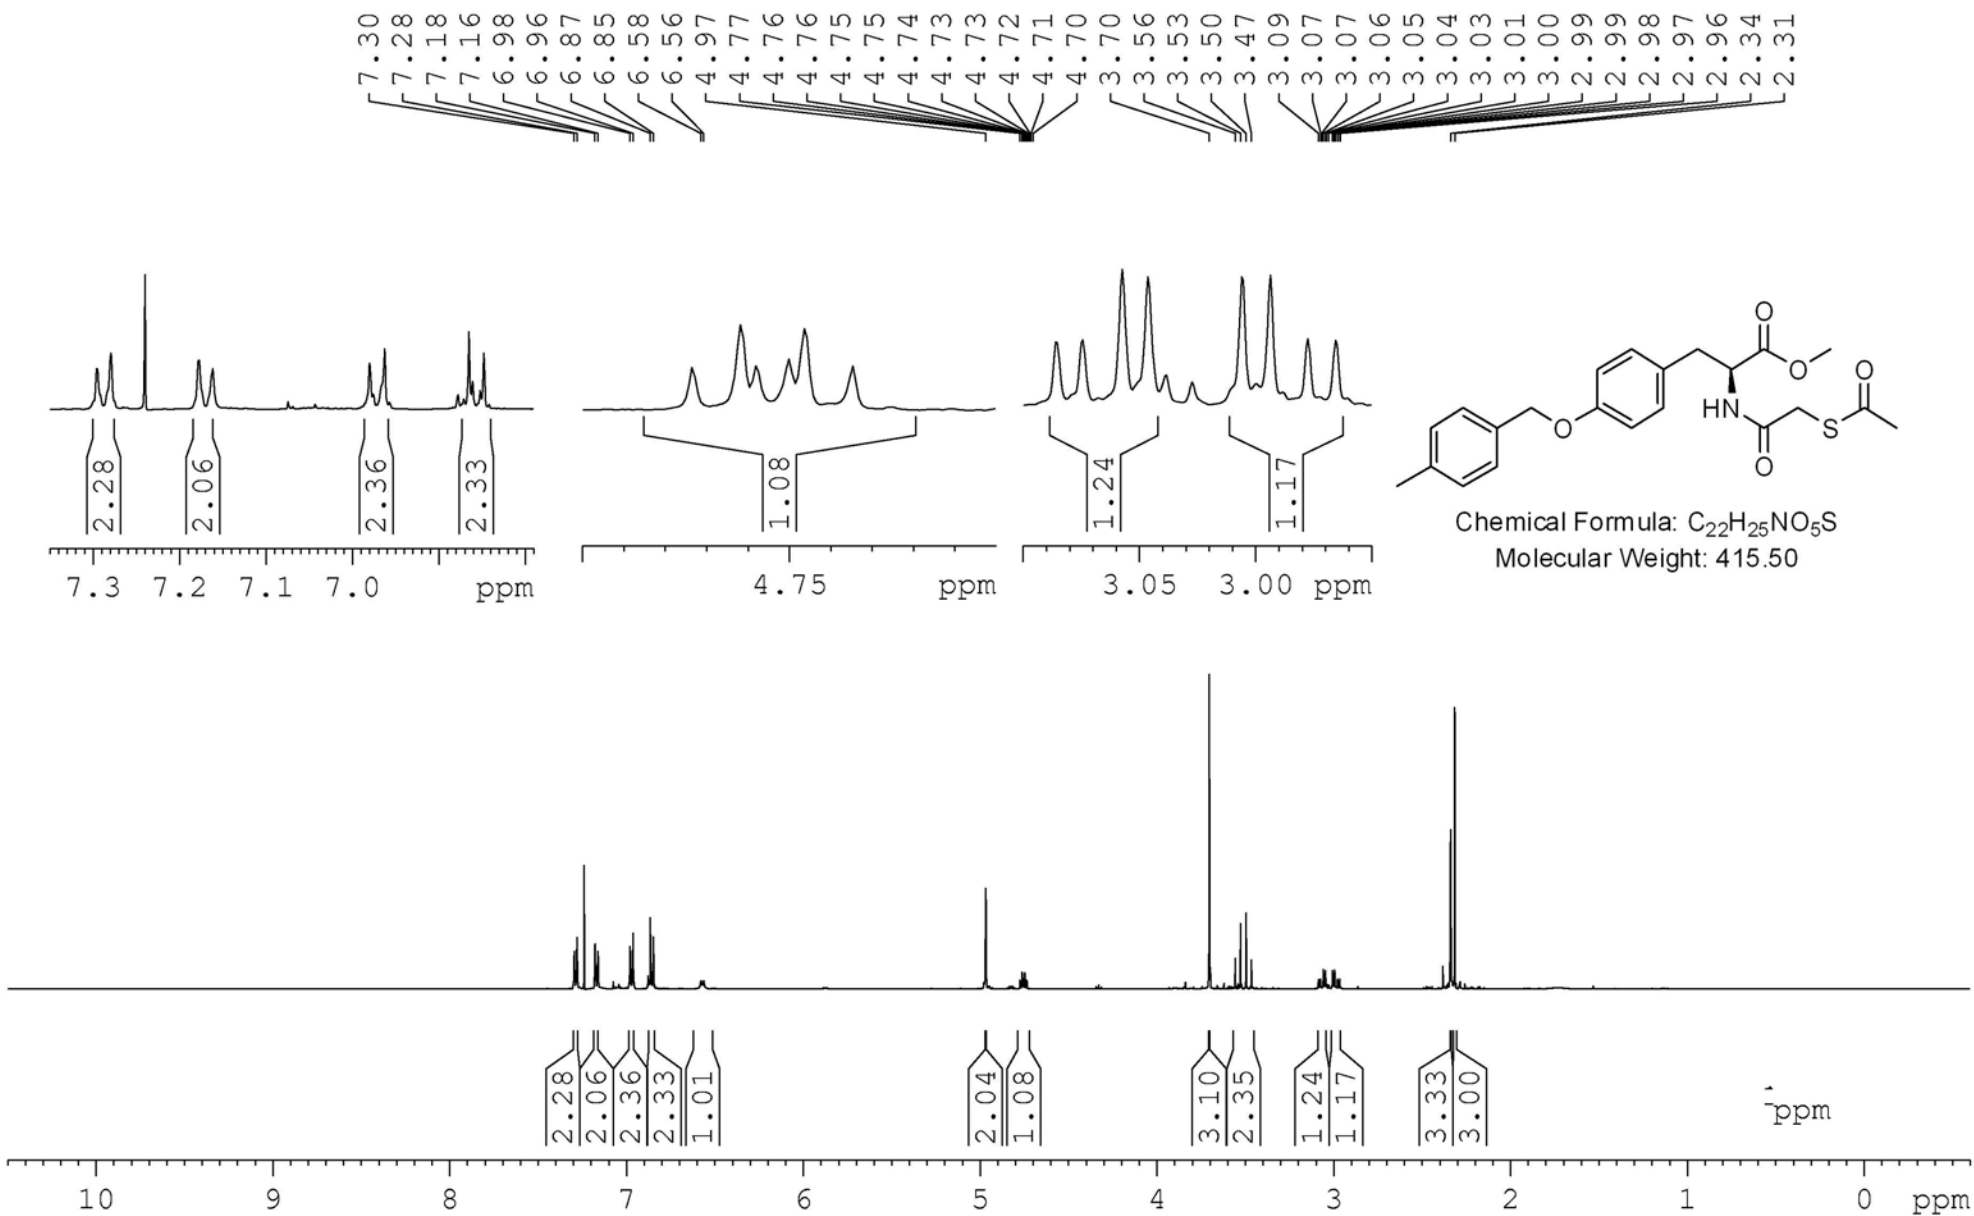

Solvent: CDCl<sub>3</sub> & NMR: 125 MHz

— 195.16

— 171.60

— 167.56

— 157.99

— 137.76

— 133.87

— 130.27

— 129.25

— 127.72

— 127.59

— 114.87

— 69.90

— 53.50

— 52.34

— 36.77

— 32.76

— 30.13

— 21.17

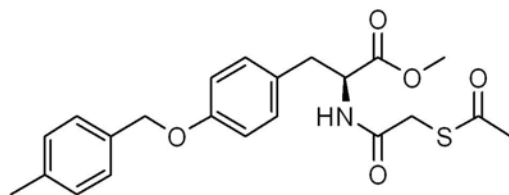

Chemical Formula: C<sub>22</sub>H<sub>25</sub>NO<sub>5</sub>S

Molecular Weight: 415.50

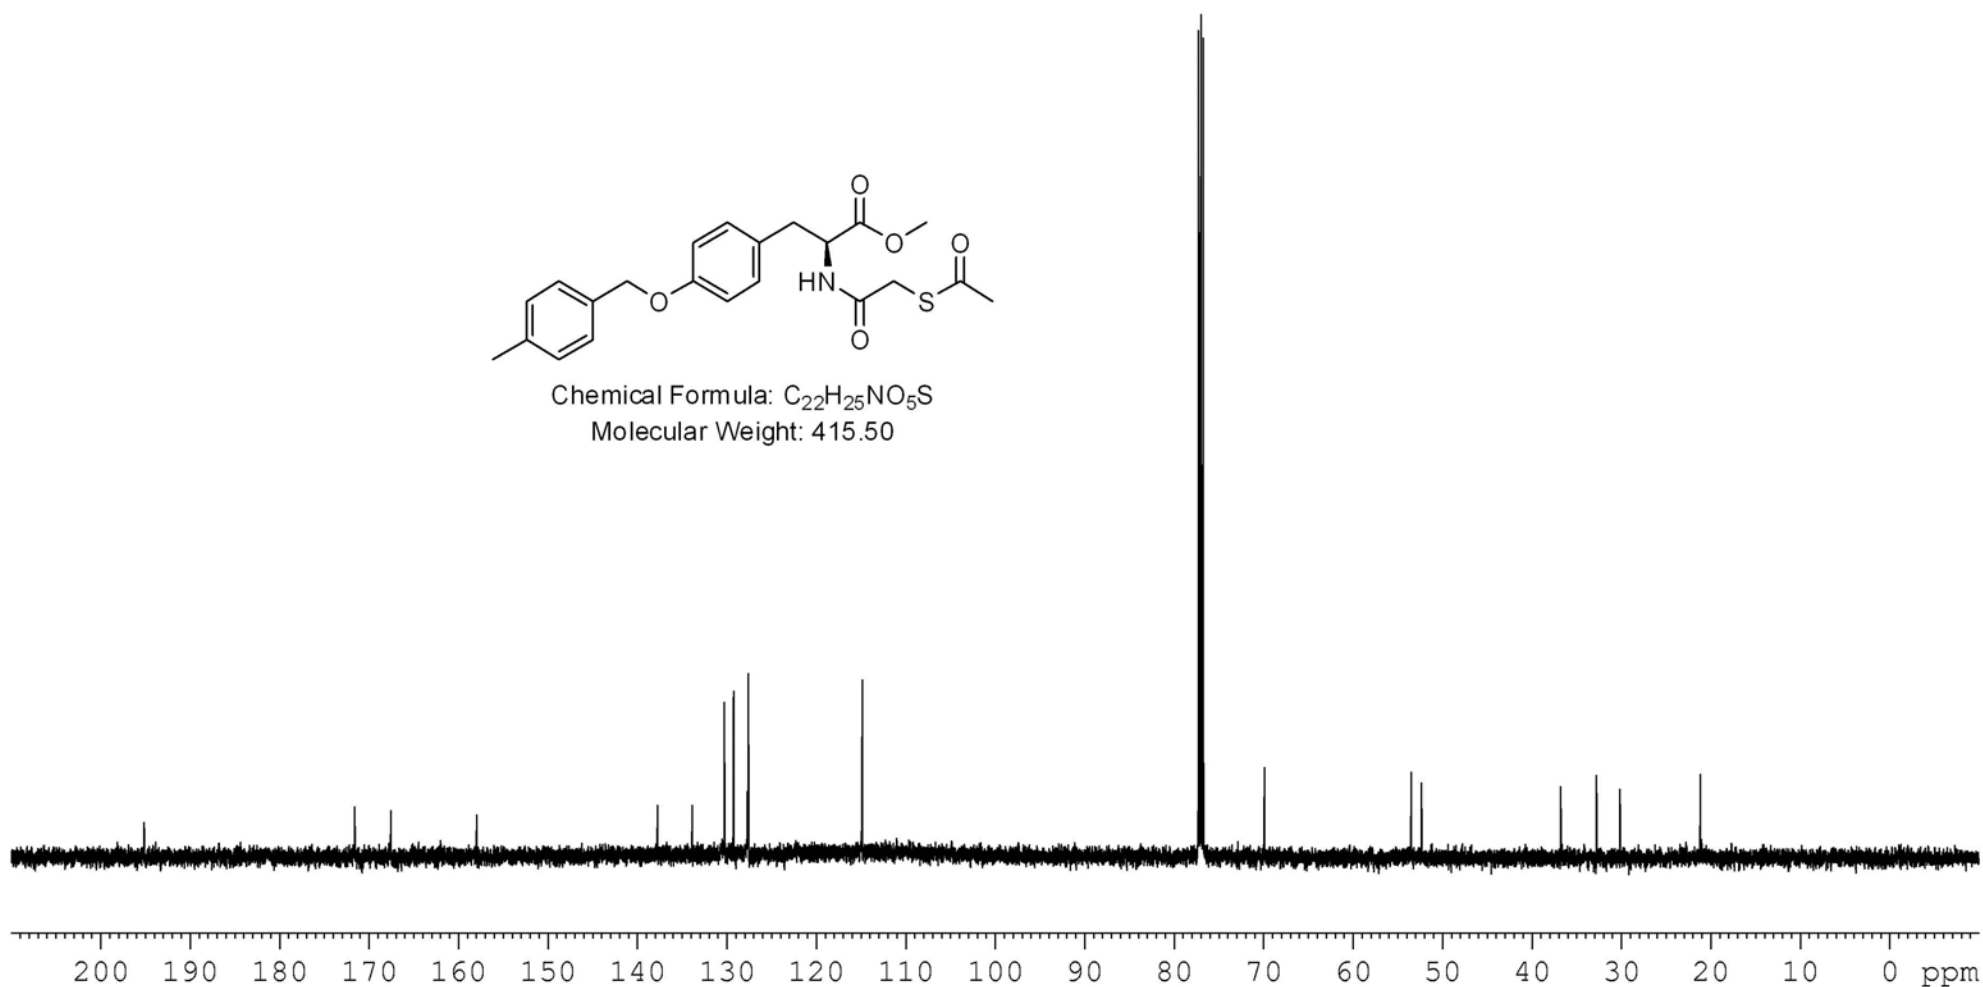

Solvent: CD<sub>3</sub>OD & NMR: 500 MHz

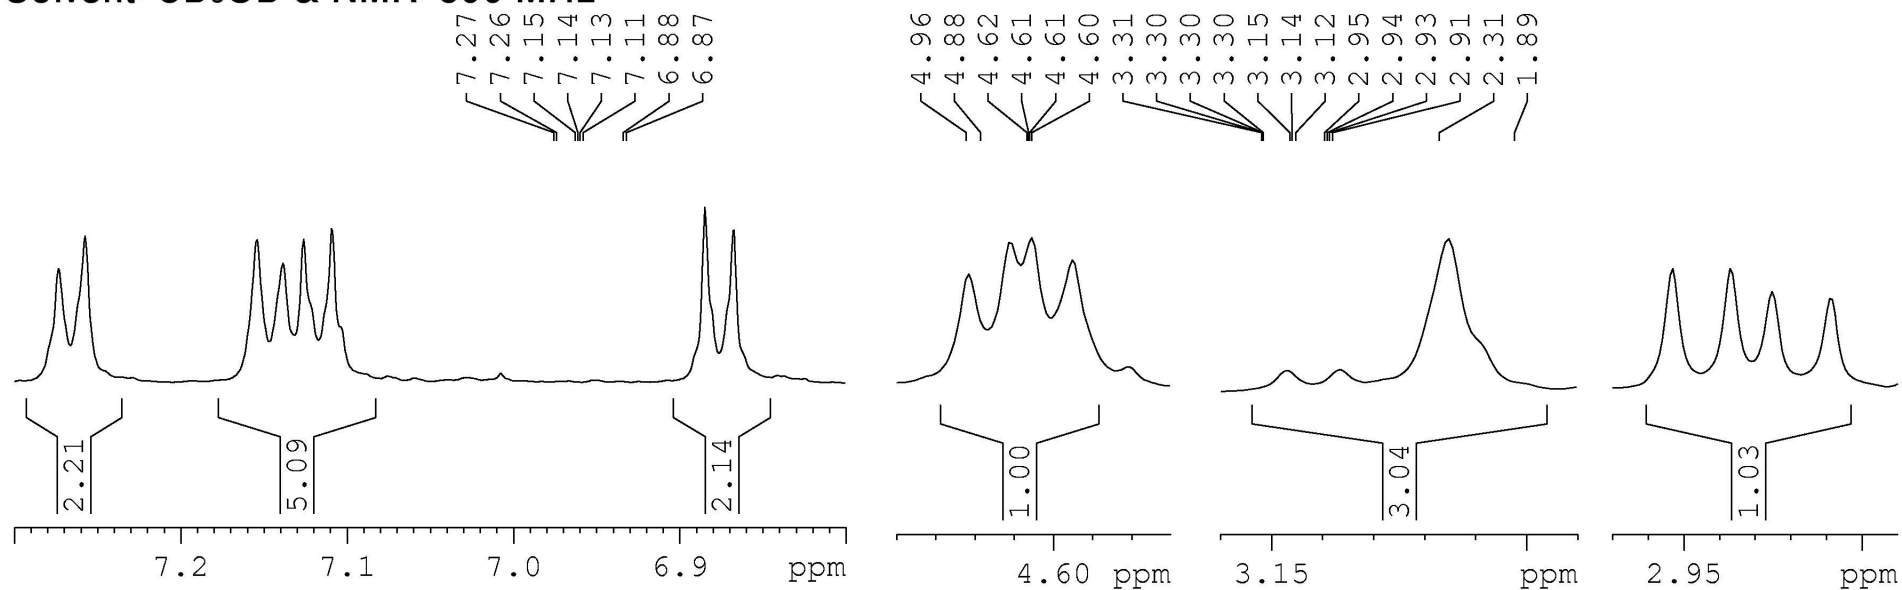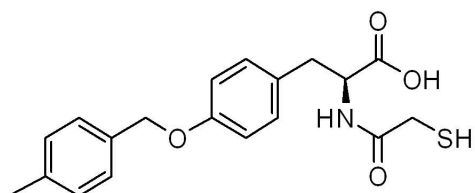

Chemical Formula: C<sub>19</sub>H<sub>21</sub>NO<sub>4</sub>S  
Molecular Weight: 359.44

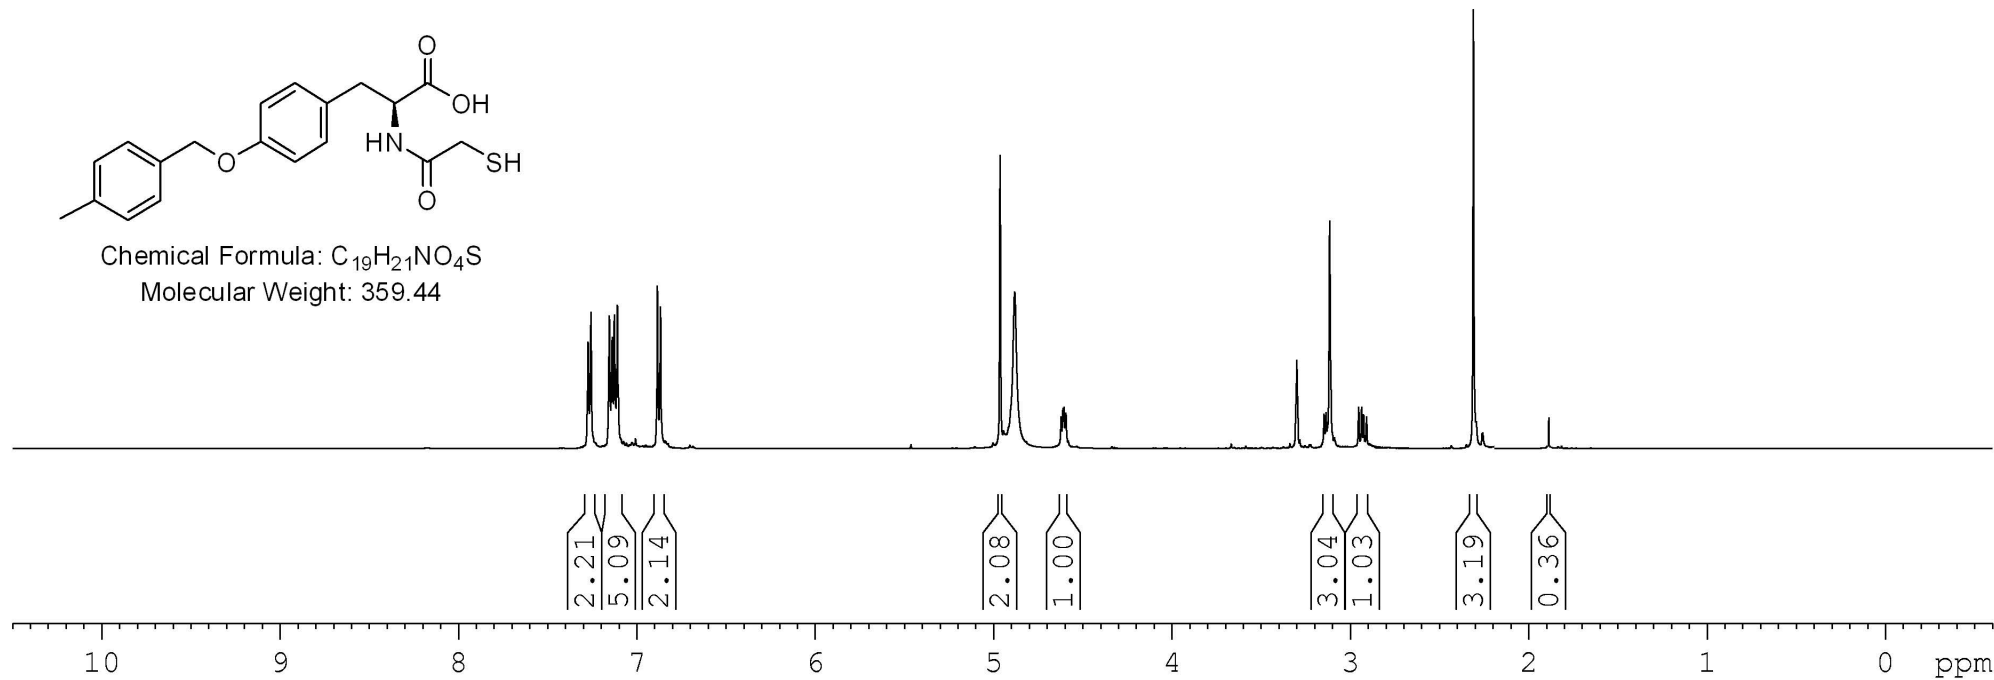

Solvent: CD<sub>3</sub>OD & NMR: 125 MHz

174.38  
172.87

159.24

138.65

135.68

131.38

130.22

130.06

128.66

115.94

70.90

55.31

37.51

28.00

21.21

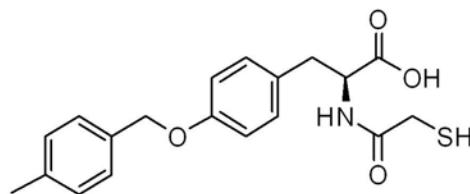

Chemical Formula: C<sub>19</sub>H<sub>21</sub>NO<sub>4</sub>S  
Molecular Weight: 359.44

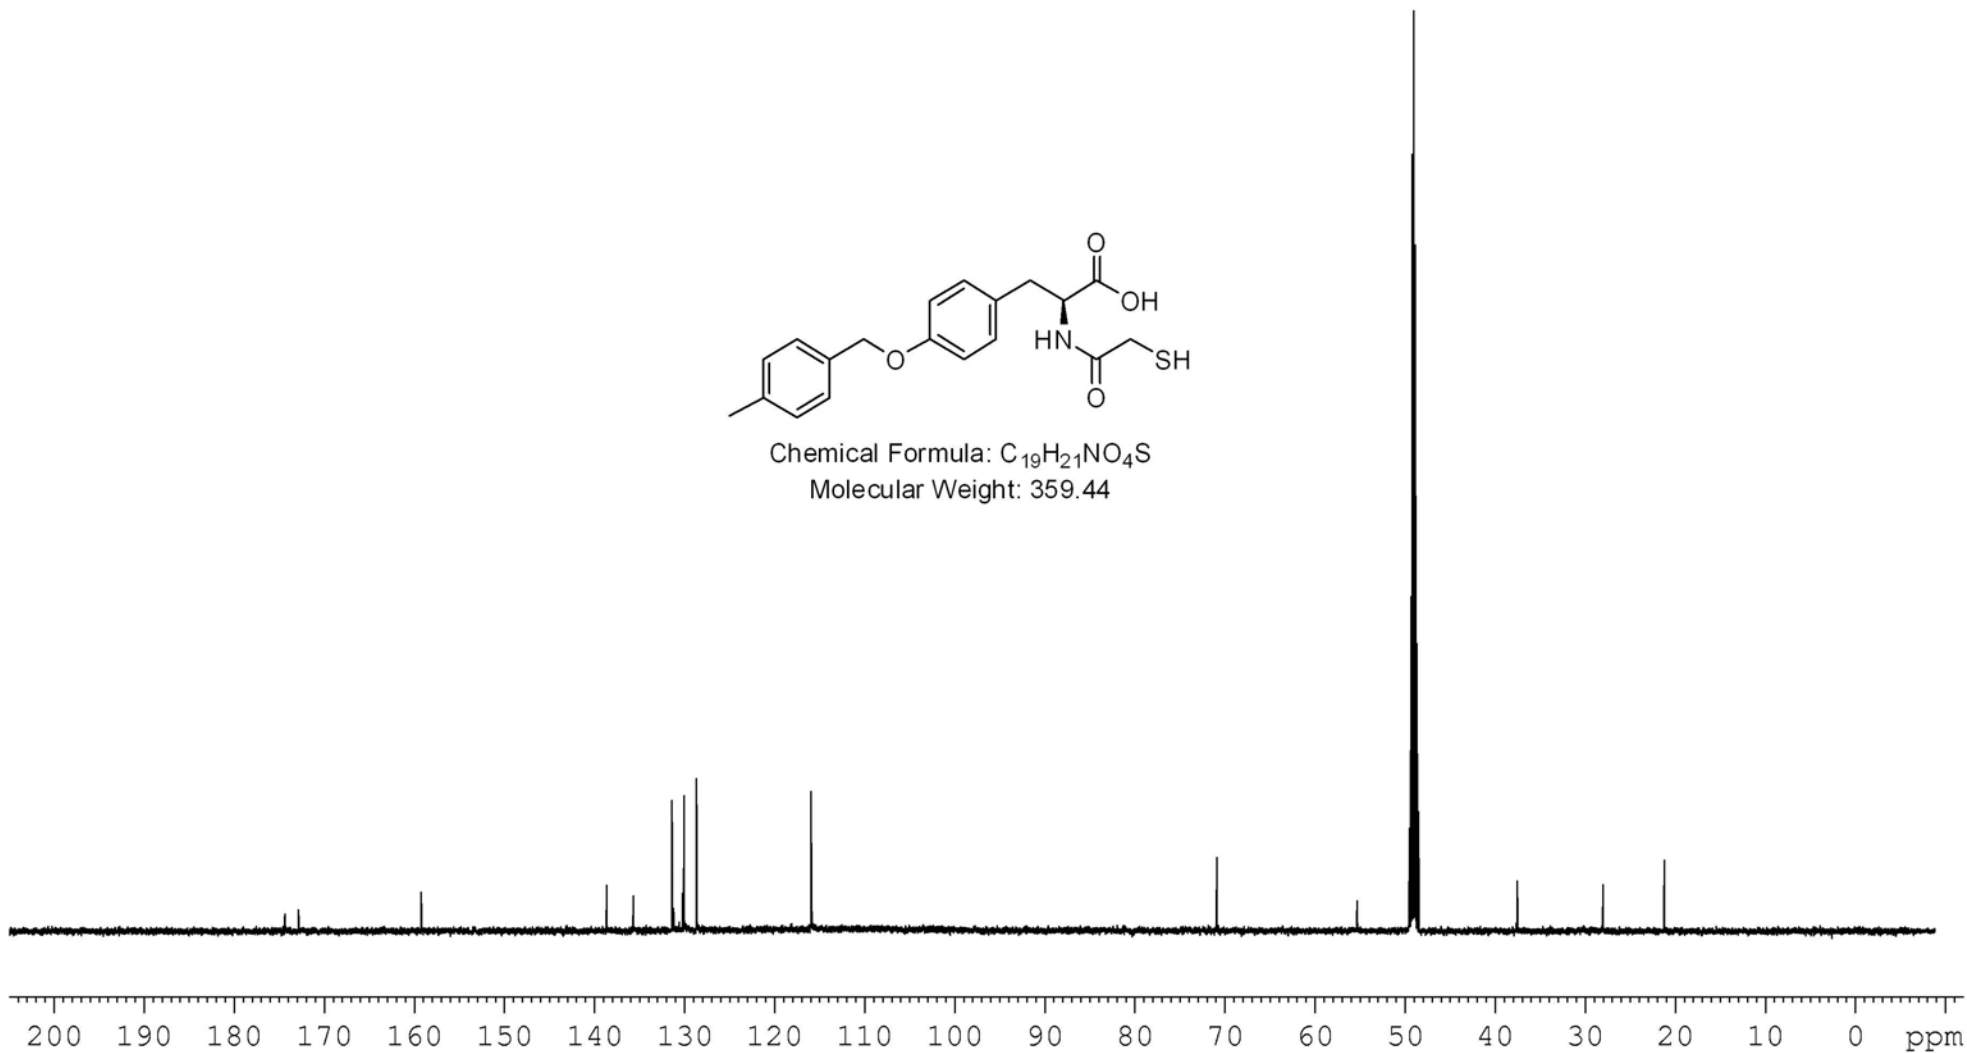

Solvent: CDCl<sub>3</sub> & NMR: 500 MHz

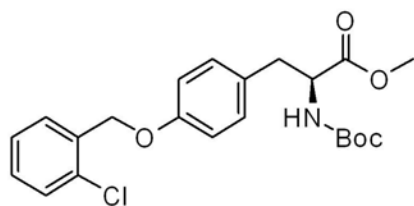

Chemical Formula: C<sub>22</sub>H<sub>26</sub>ClNO<sub>5</sub>  
Molecular Weight: 419.90

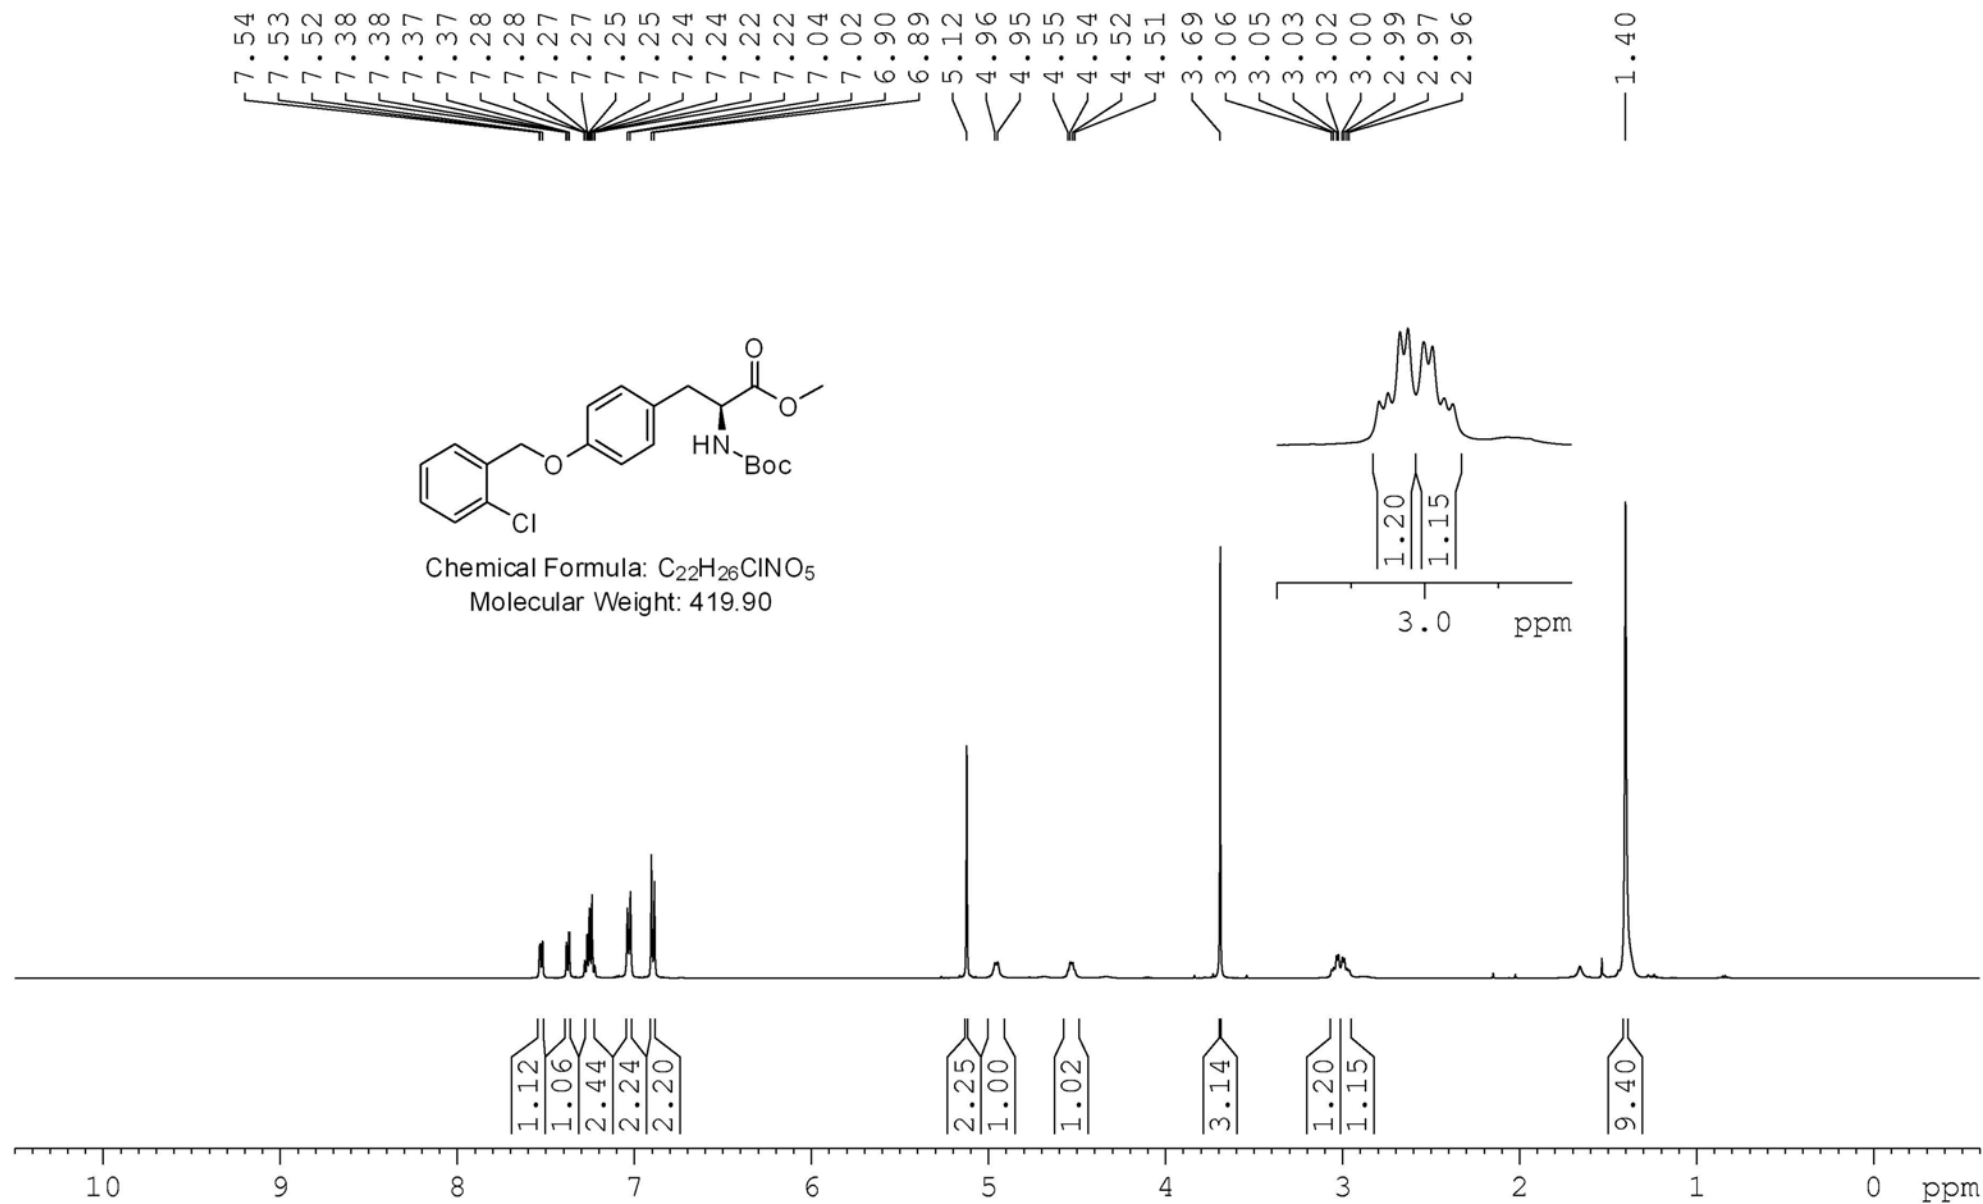

Solvent:  $\text{CDCl}_3$  & NMR: 125 MHz

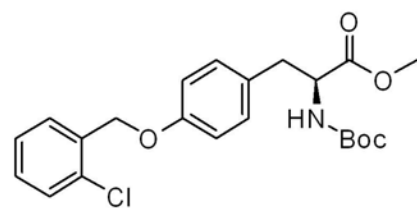

Chemical Formula:  $\text{C}_{22}\text{H}_{26}\text{ClNO}_5$

Molecular Weight: 419.90

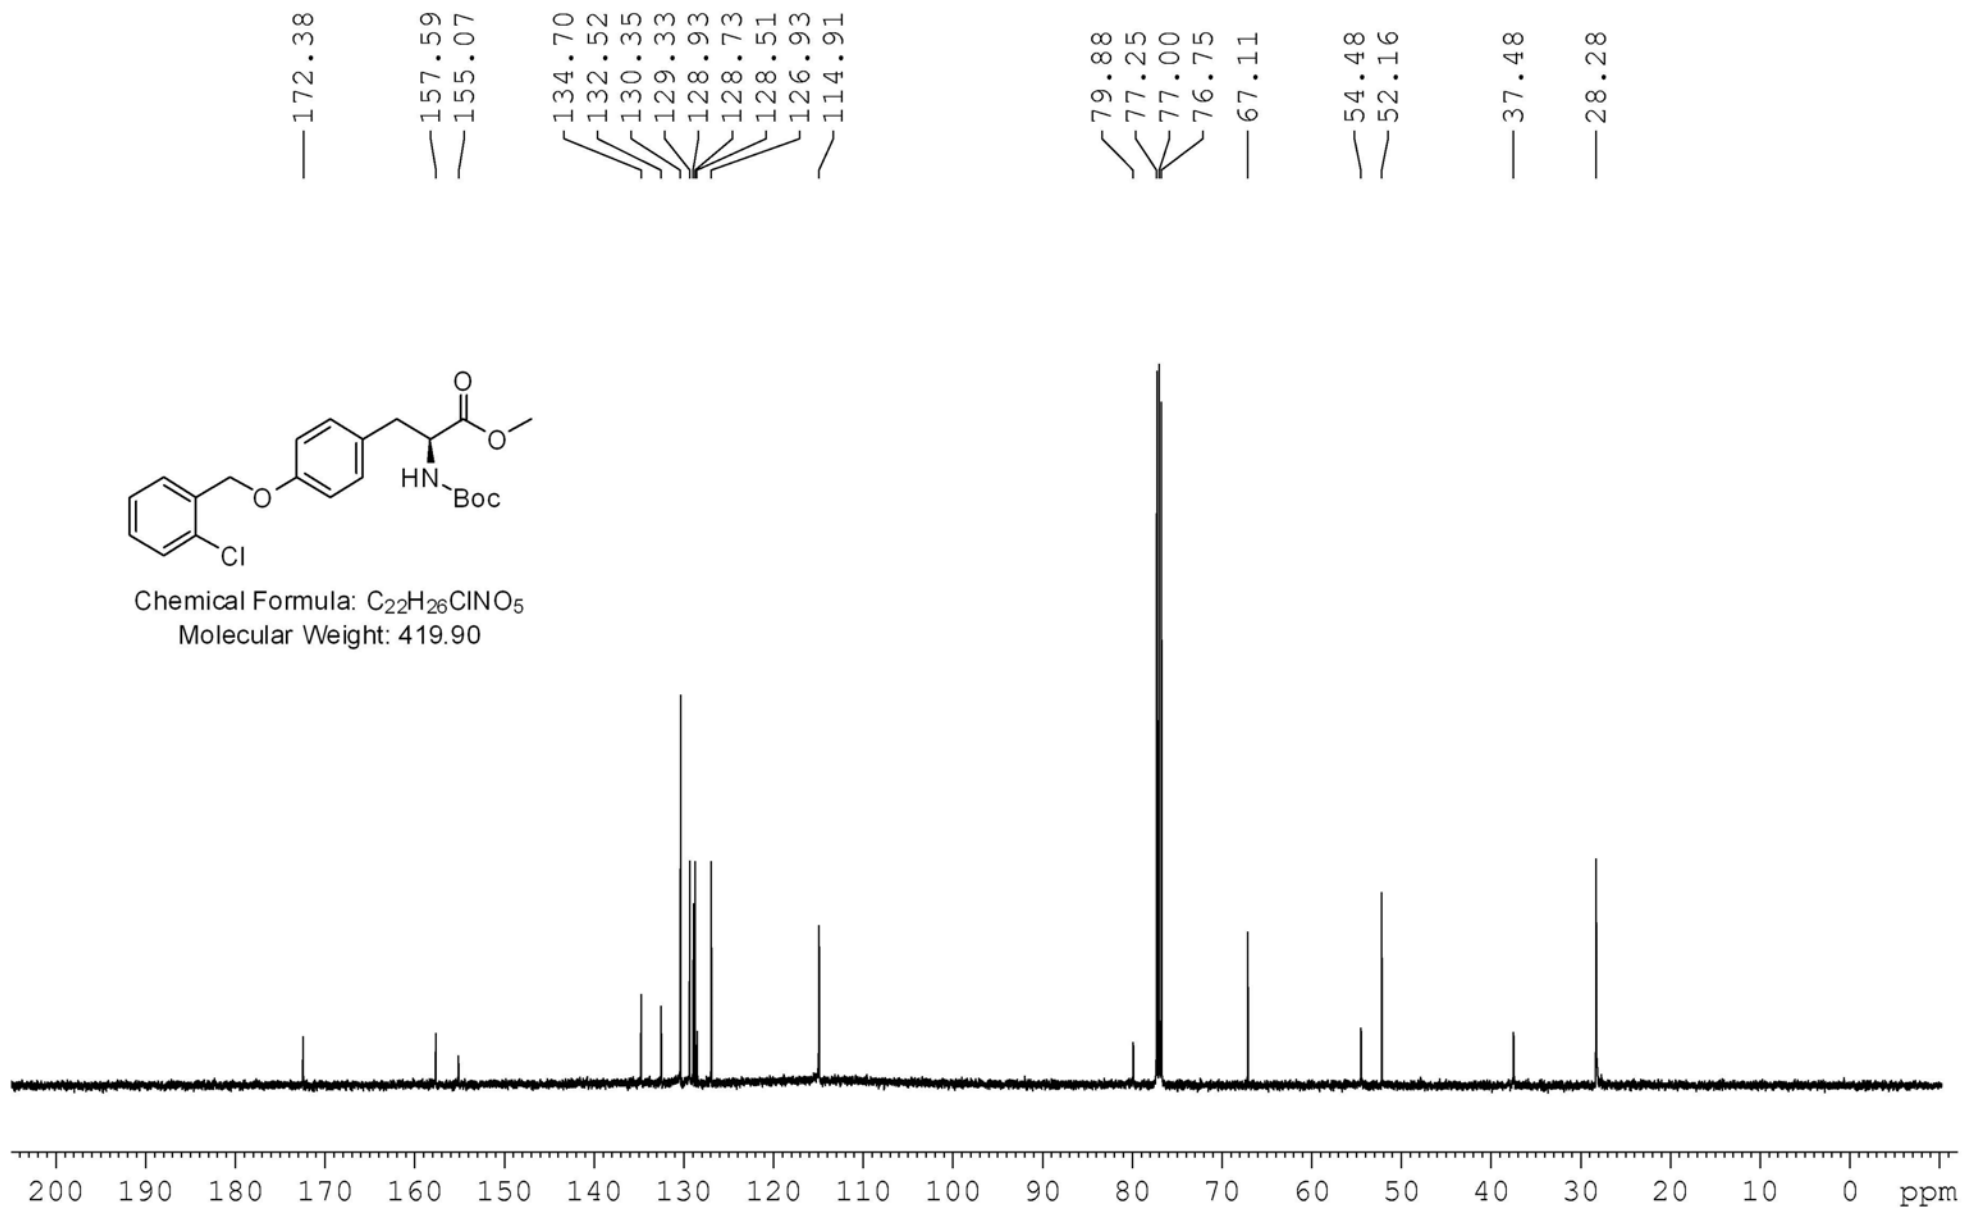

Solvent: CDCl<sub>3</sub> & NMR: 500 MHz

7.53  
7.53  
7.52  
7.52  
7.38  
7.37  
7.36  
7.36  
7.27  
7.27  
7.26  
7.26  
7.24  
7.24  
7.23  
7.23  
7.21  
7.10  
7.09  
6.91  
6.90  
— 5.12

3.69  
3.03  
3.02  
3.00  
2.99  
2.83  
2.81  
2.80  
2.78  
— 1.67

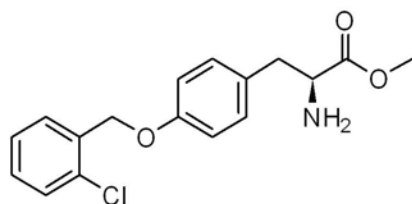

Chemical Formula: C<sub>17</sub>H<sub>18</sub>ClNO<sub>3</sub>

Molecular Weight: 319.78

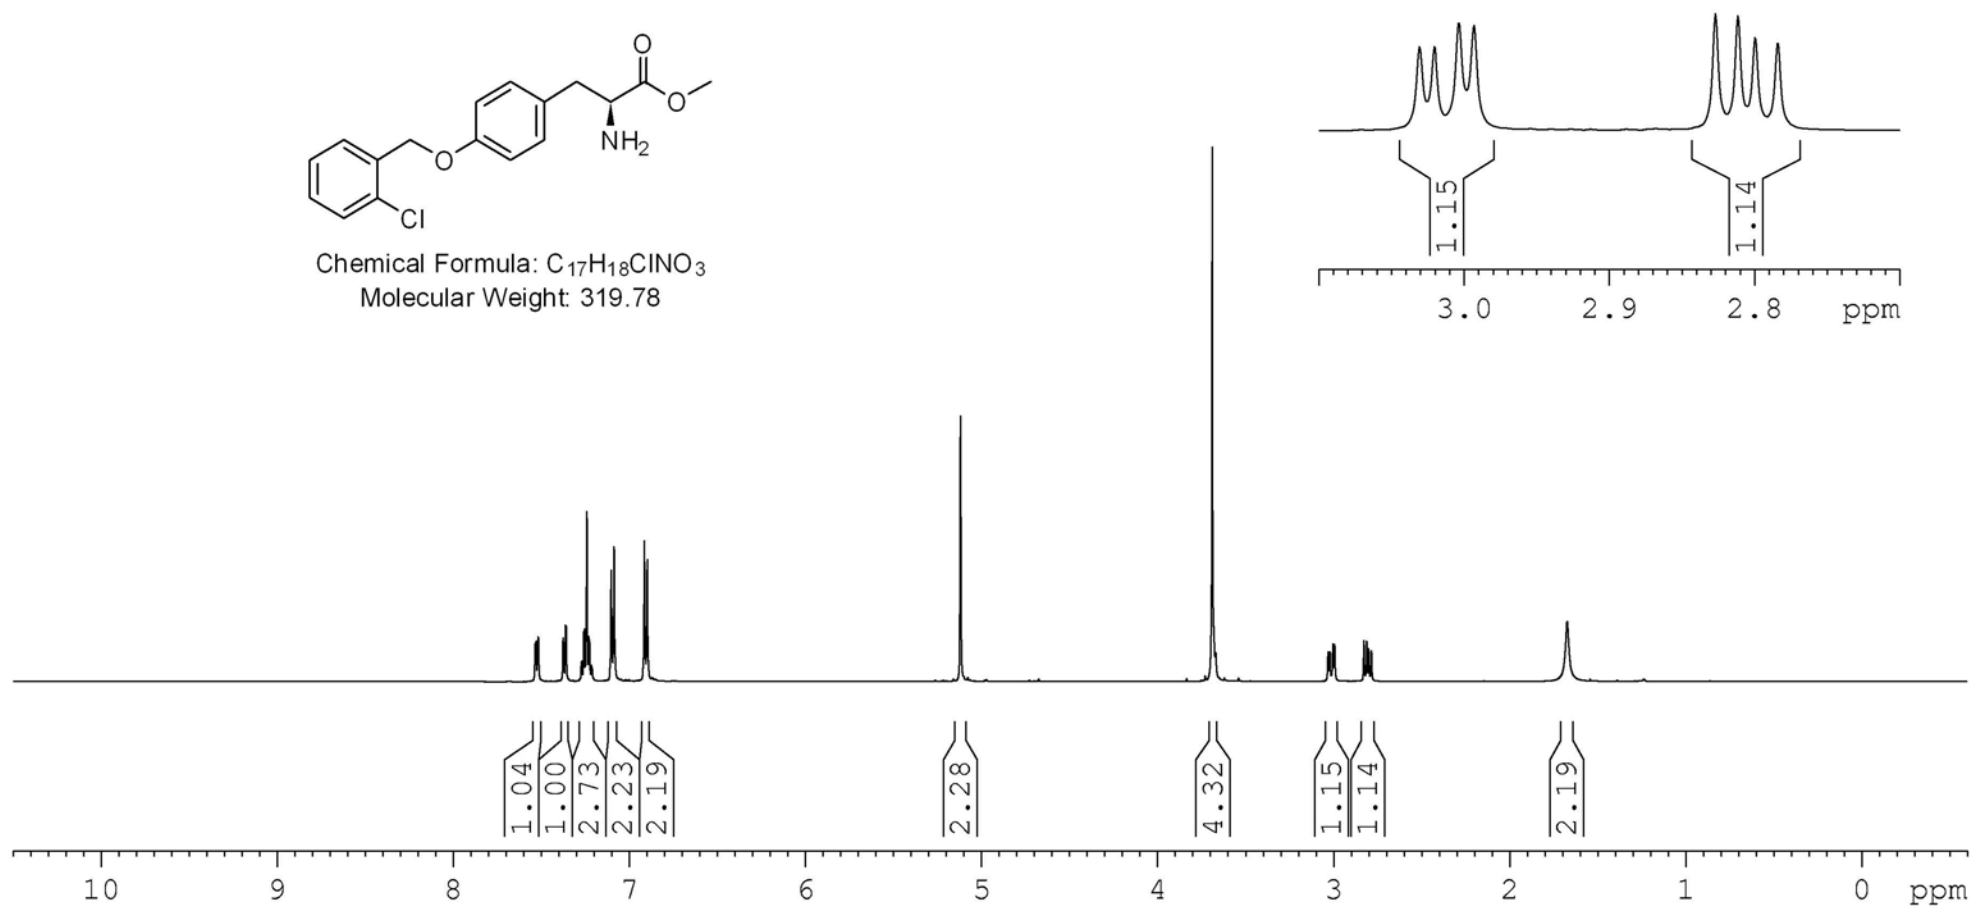

Solvent: CDCl<sub>3</sub> & NMR: 125 MHz

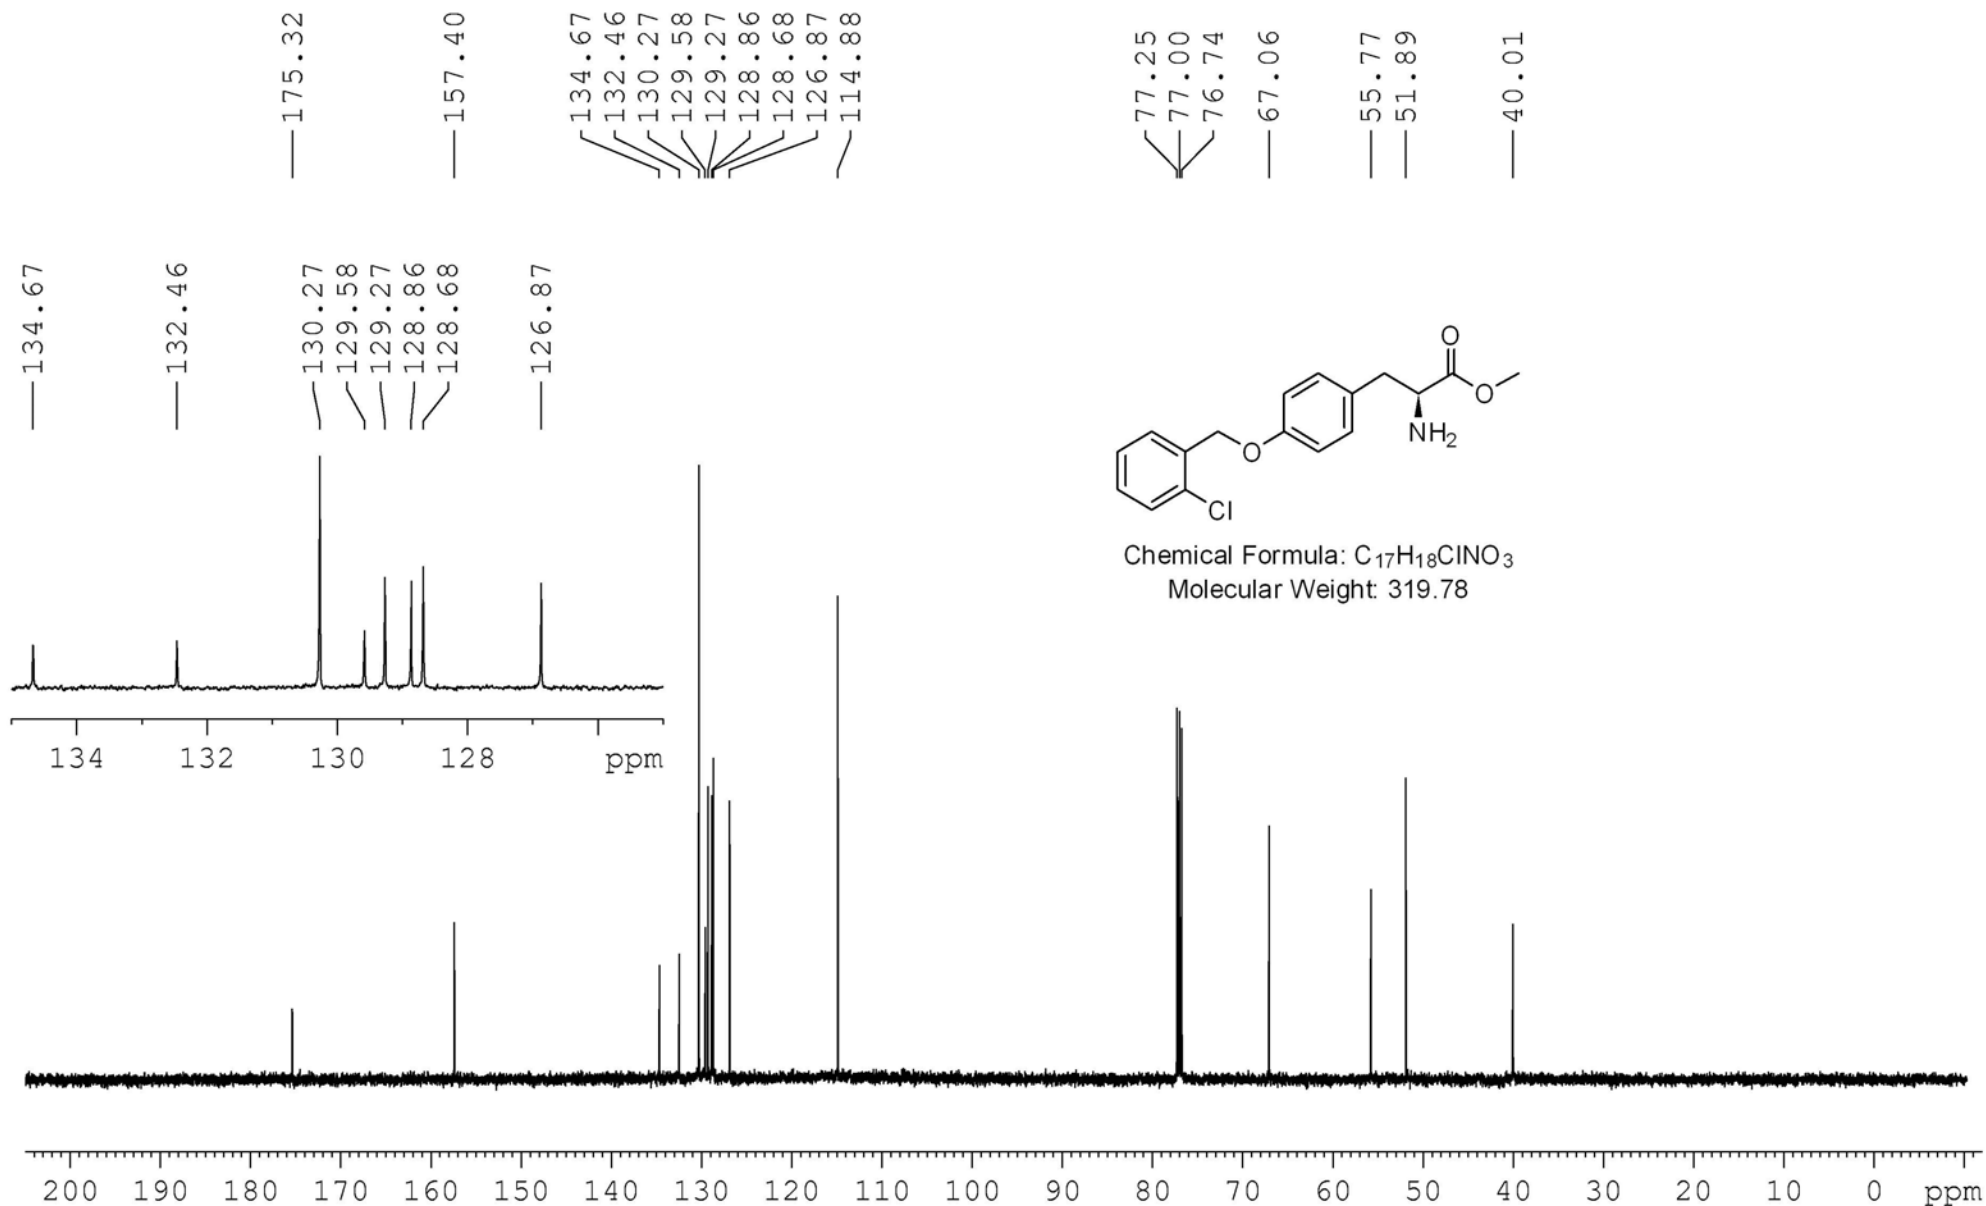

Solvent:  $\text{CDCl}_3$  & NMR: 500 MHz

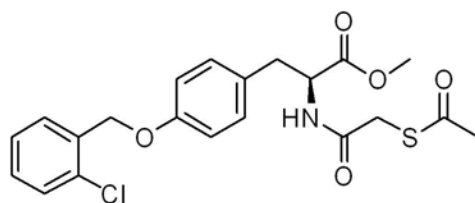

Chemical Formula: C<sub>21</sub>H<sub>22</sub>ClNO<sub>5</sub>S

Molecular Weight: 435.92

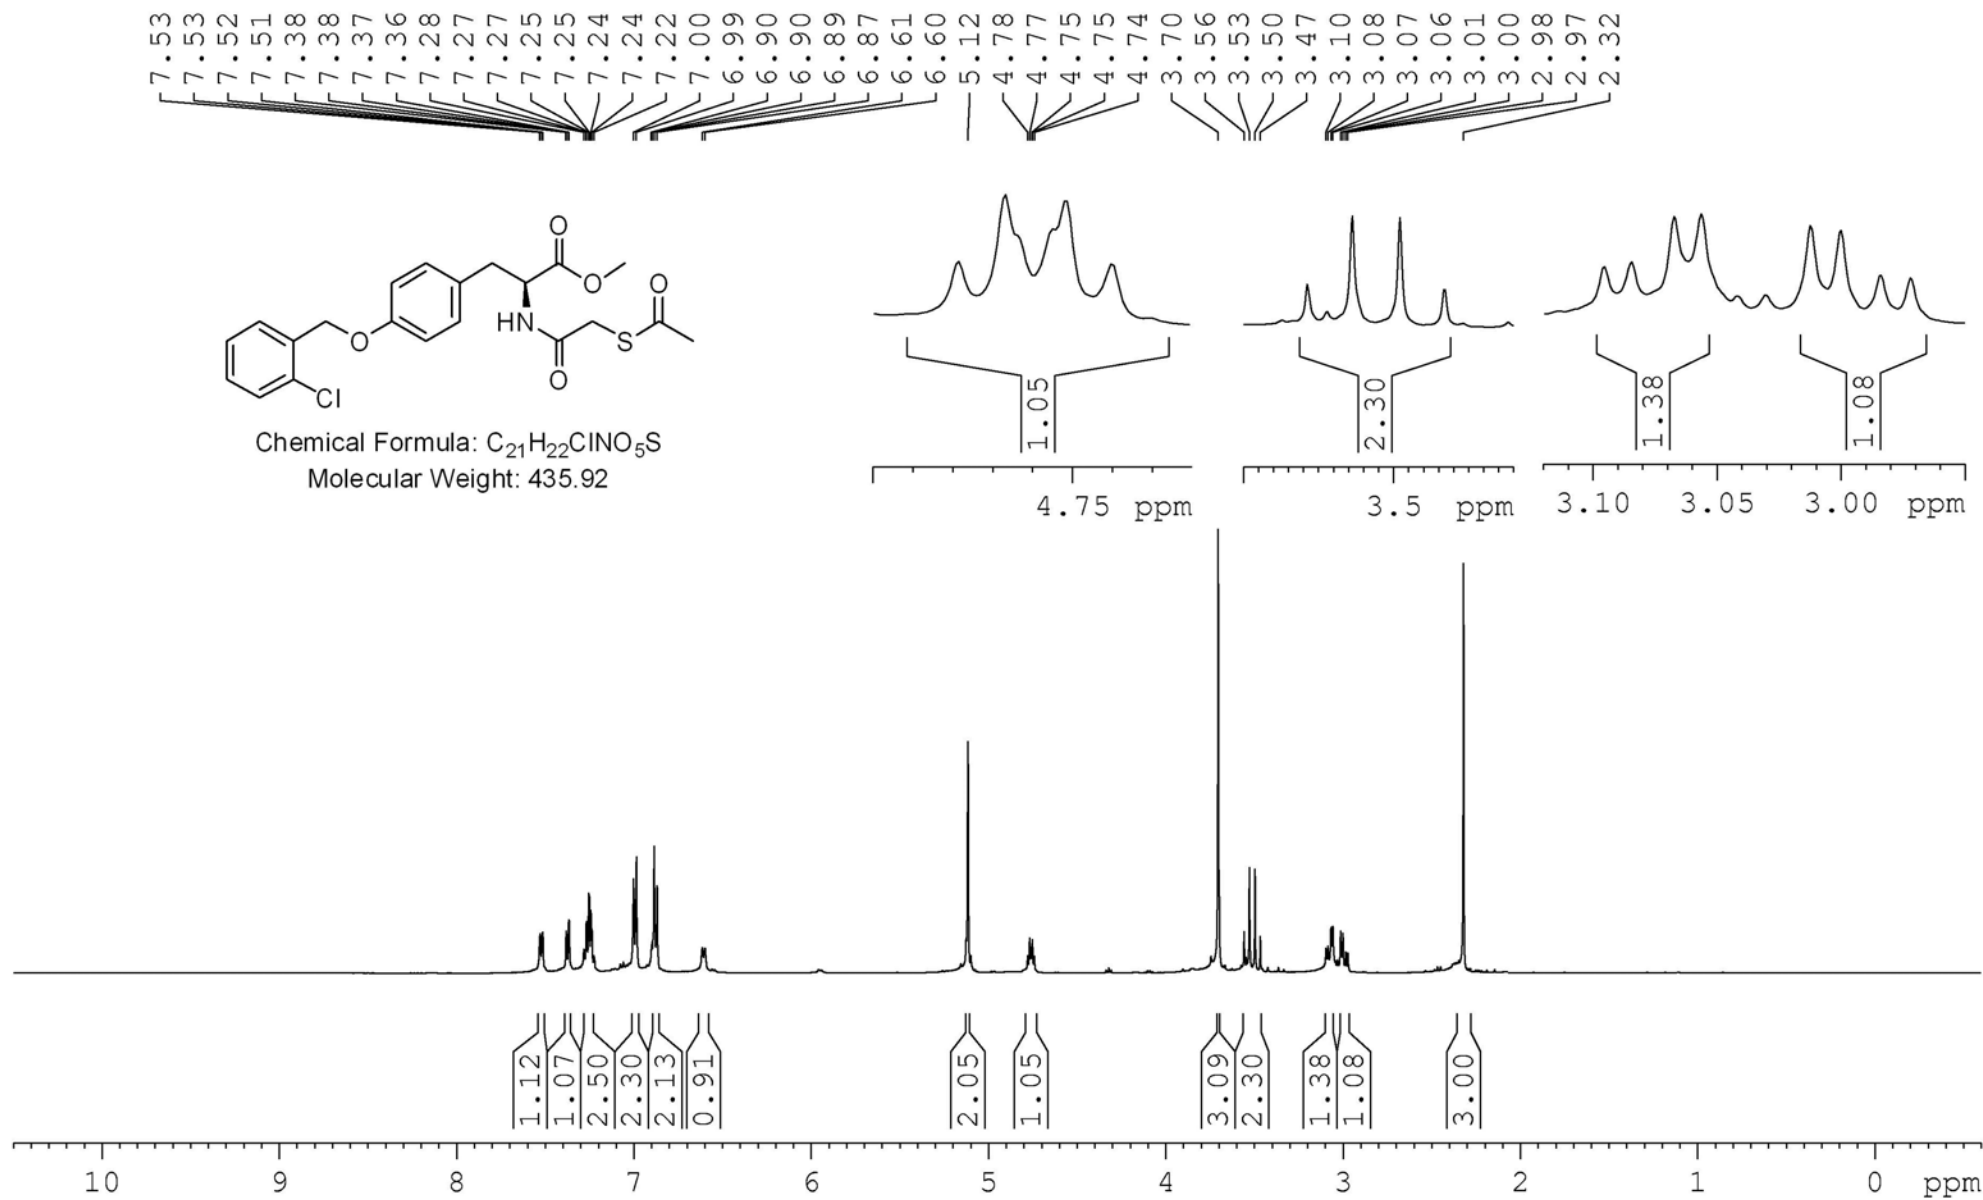

Solvent: CDCl<sub>3</sub> & NMR: 125 MHz

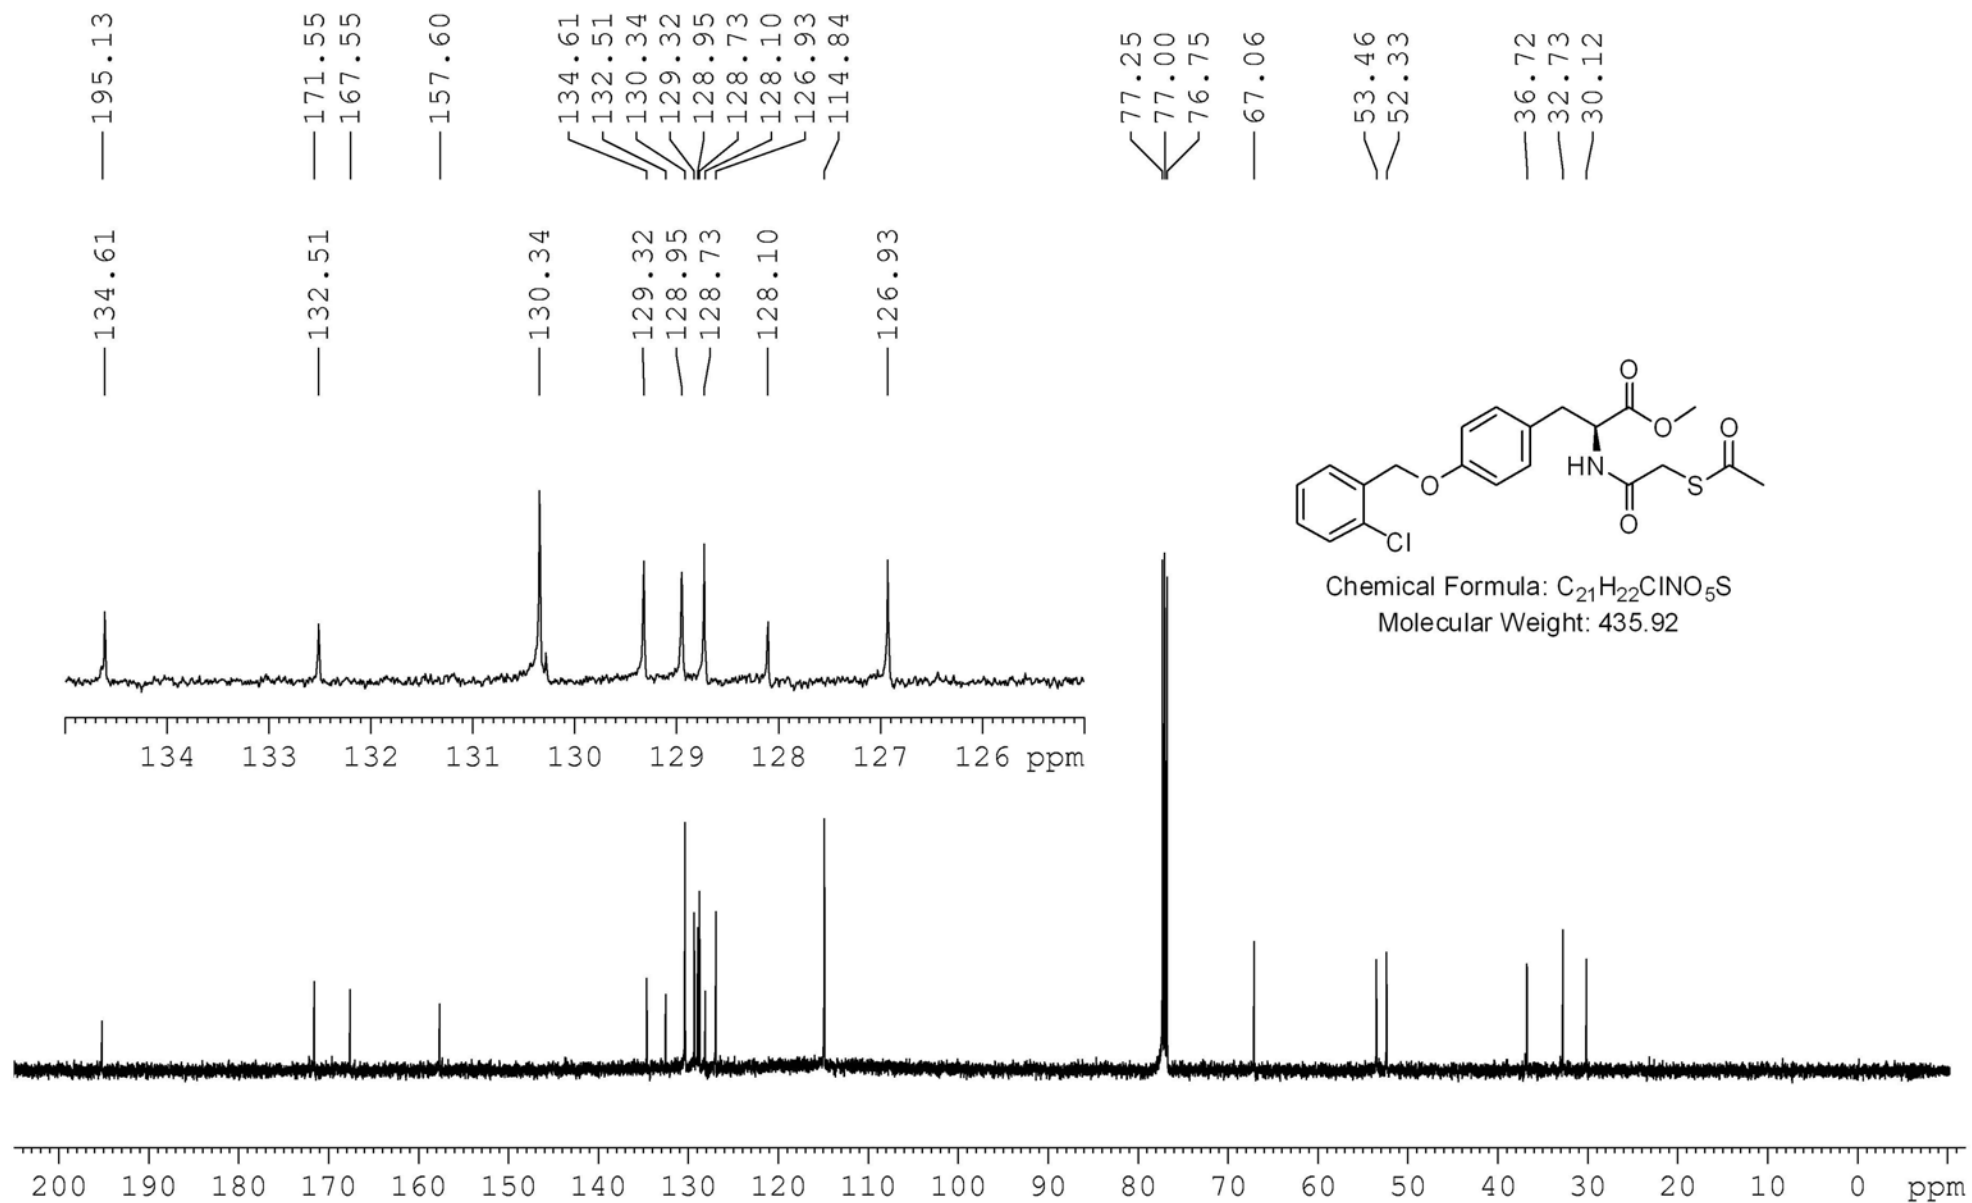

Solvent: CD<sub>3</sub>OD & NMR: 500 MHz

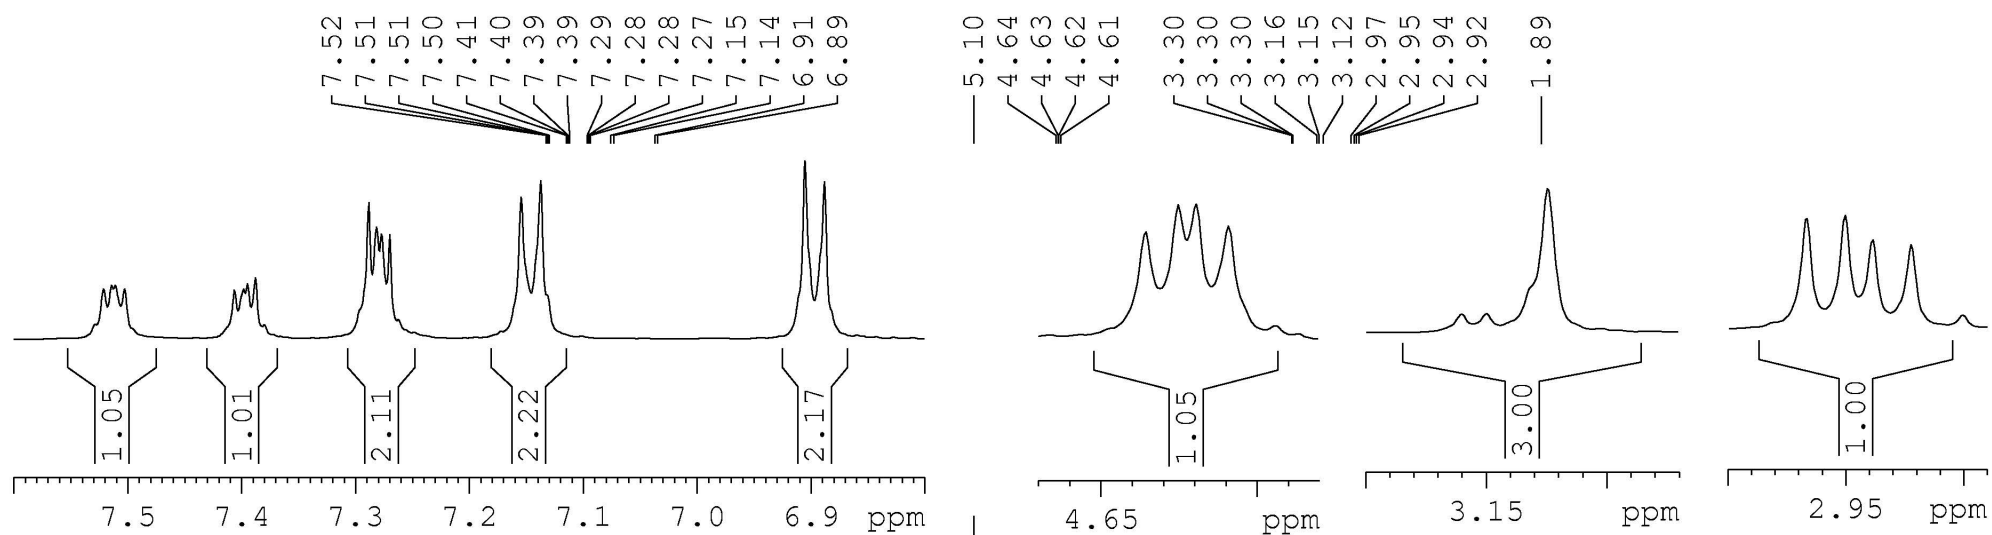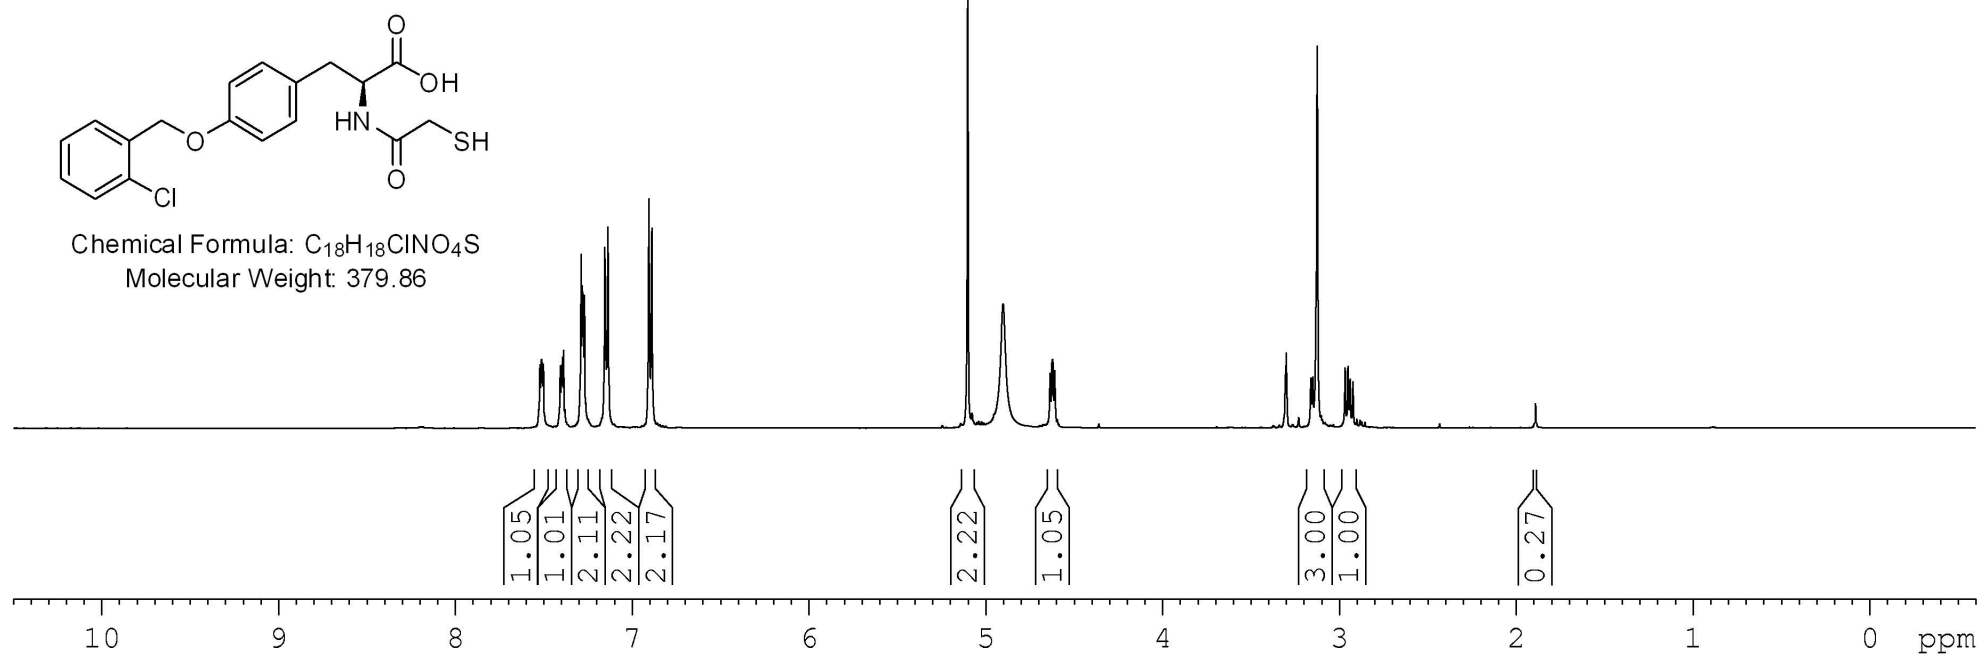

Solvent: CD<sub>3</sub>OD & NMR: 125 MHz

174.34  
172.88

158.95

136.14  
133.97  
131.50  
130.64  
130.40  
130.38  
130.33  
128.13  
115.85

68.25

55.28

37.51

28.01

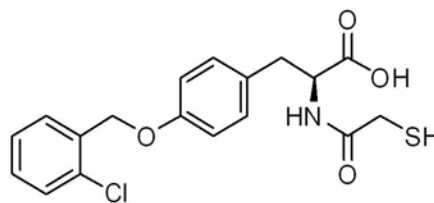

Chemical Formula: C<sub>18</sub>H<sub>18</sub>ClNO<sub>4</sub>S  
Molecular Weight: 379.86

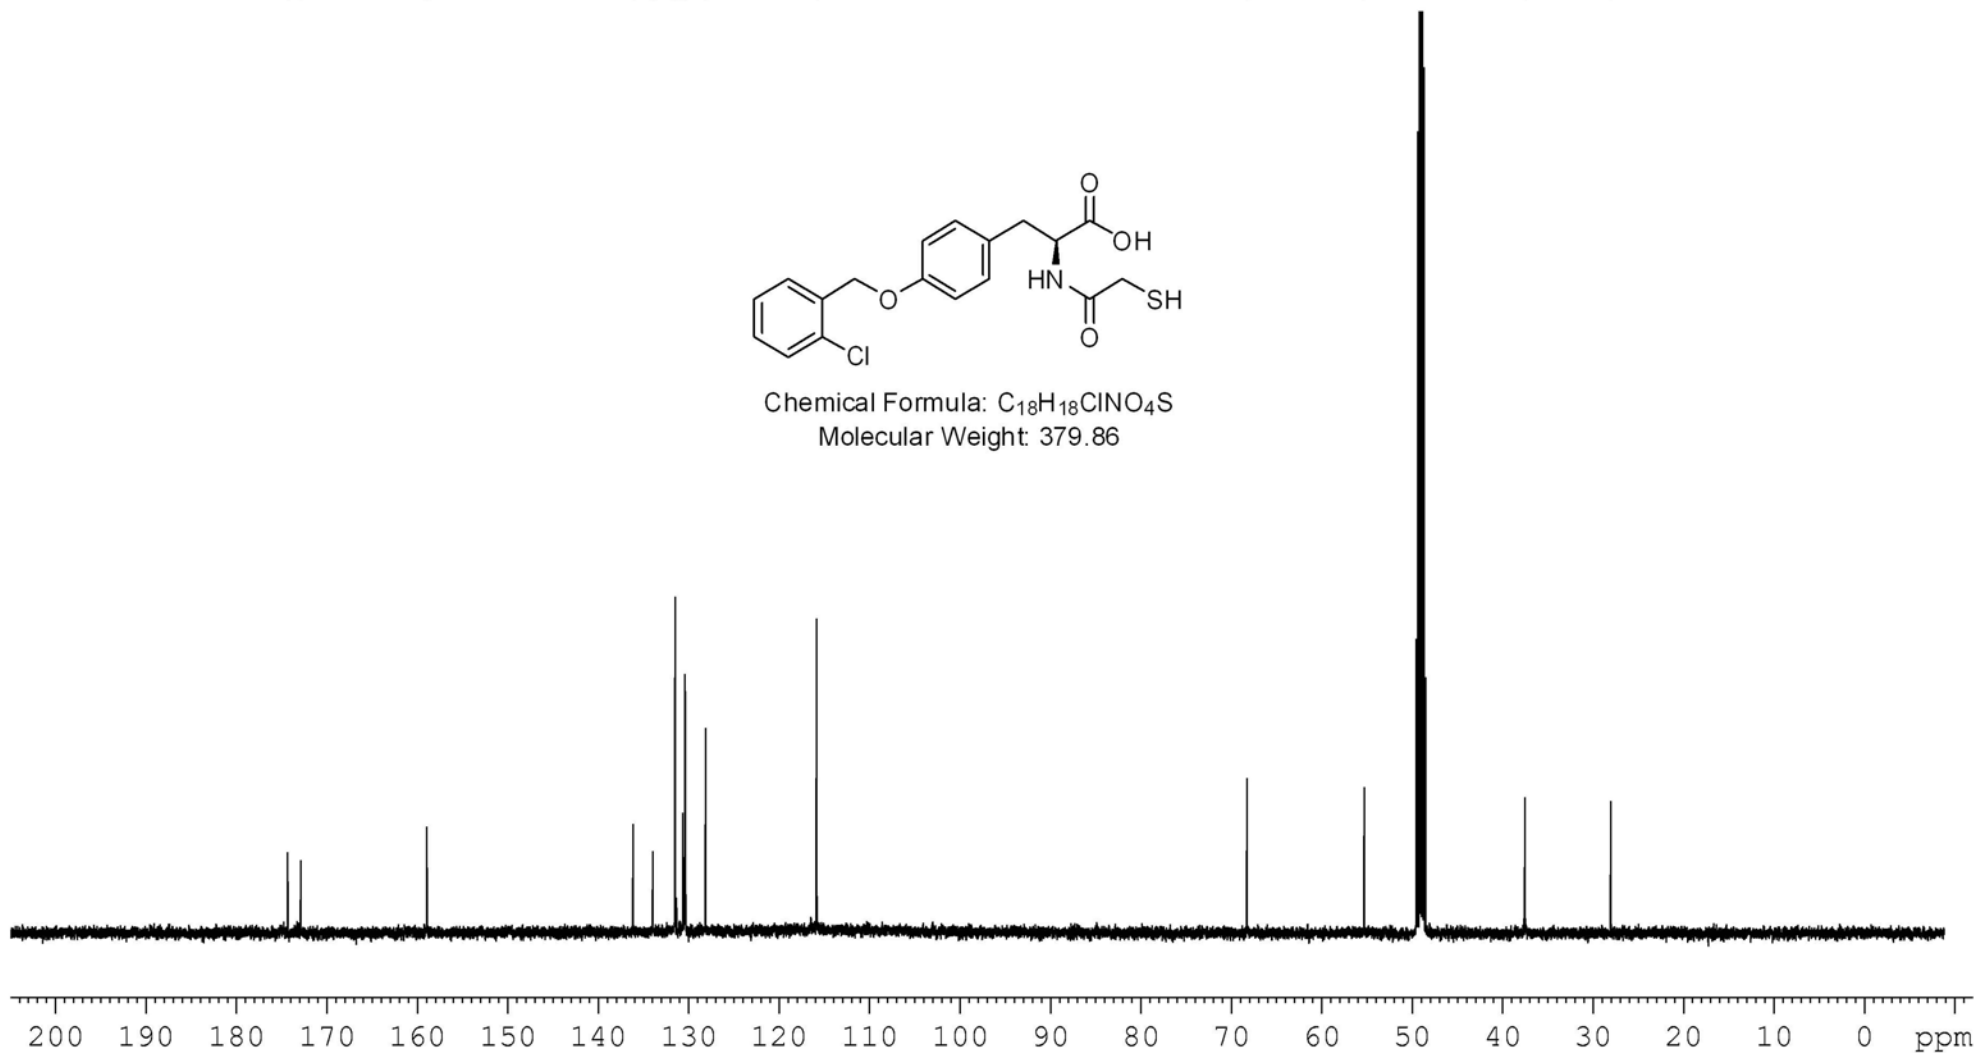

Solvent: CDCl<sub>3</sub> & NMR: 500 MHz

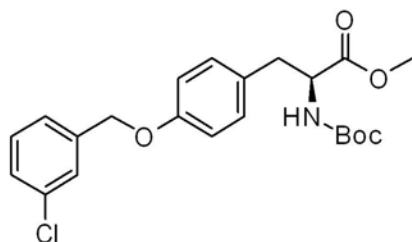

Chemical Formula: C<sub>22</sub>H<sub>26</sub>ClNO<sub>5</sub>  
Molecular Weight: 419.90

7.41  
7.28  
7.28  
7.24  
7.03  
7.02  
6.87  
6.85

4.99  
4.54  
4.53  
4.52  
4.50

3.69  
3.06  
3.04  
3.03  
3.02  
2.99  
2.98  
2.97  
2.96

1.40

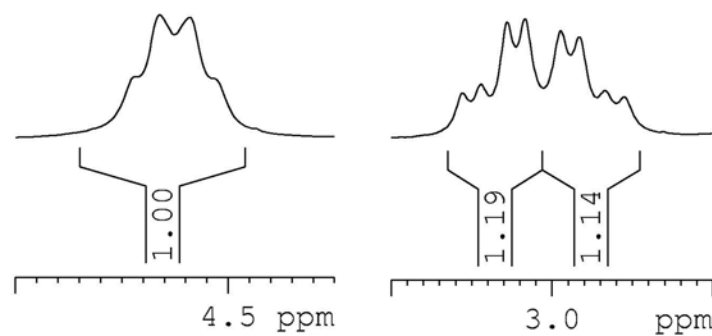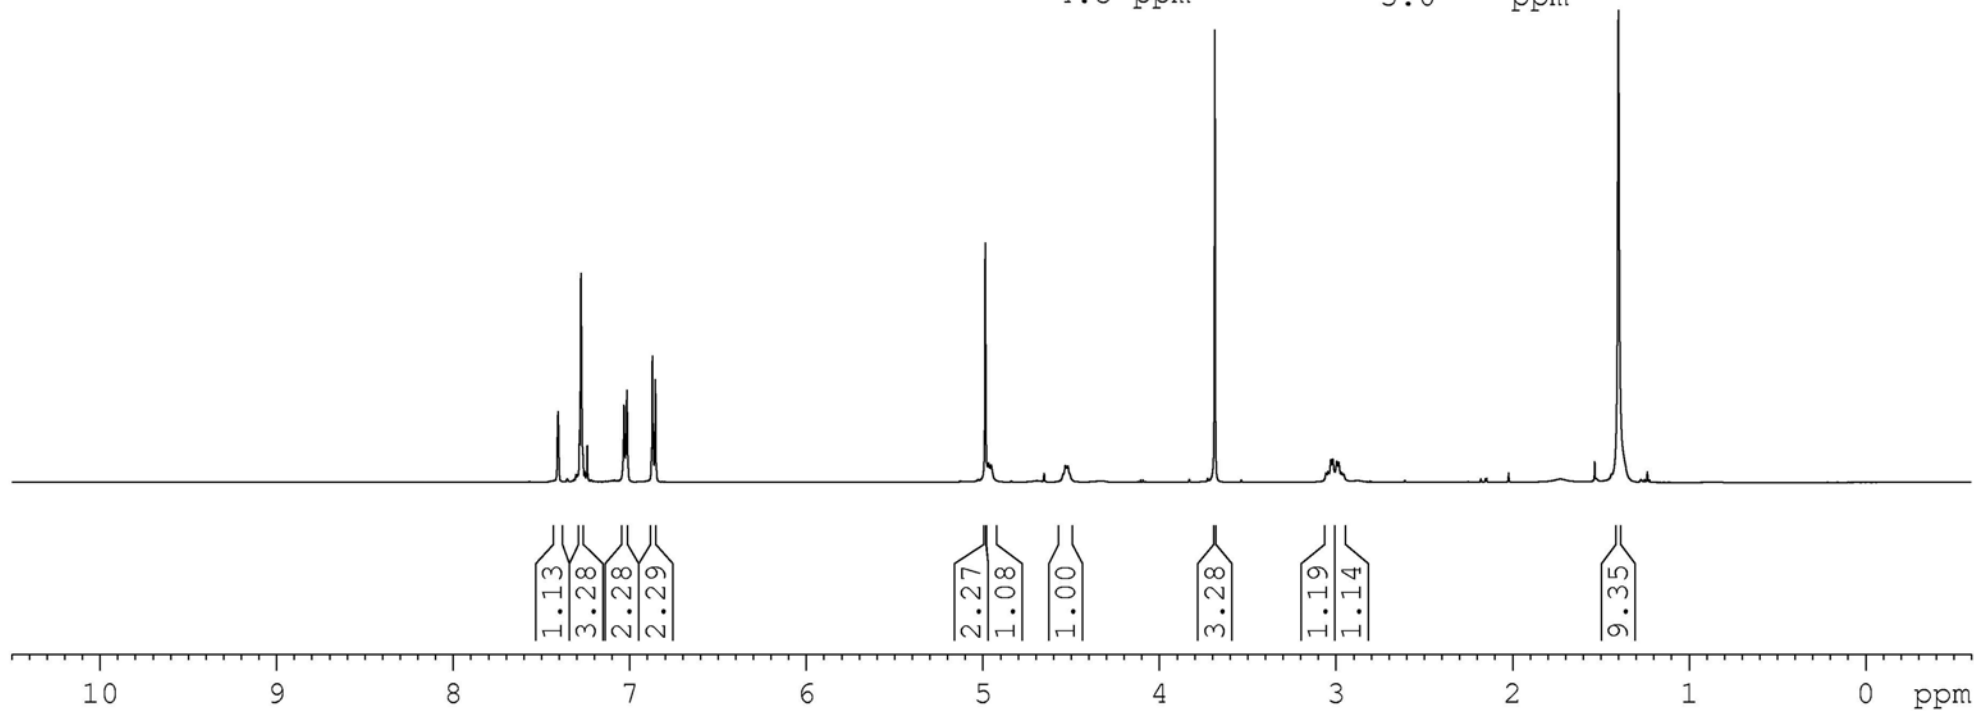

Solvent: CDCl<sub>3</sub> & NMR: 125 MHz

— 172.36  
— 157.54  
— 155.05  
— 139.06  
— 134.46  
— 130.34  
— 129.82  
— 128.55  
— 128.03  
— 127.35  
— 125.29  
— 114.85

79.87  
77.25  
77.00  
76.74  
— 69.11

— 54.47  
— 52.15

— 37.46

— 28.26

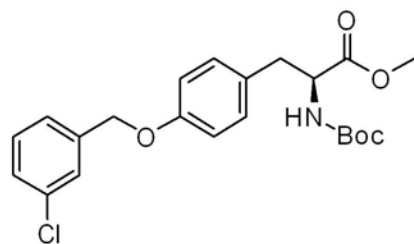

Chemical Formula: C<sub>22</sub>H<sub>26</sub>ClNO<sub>5</sub>  
Molecular Weight: 419.90

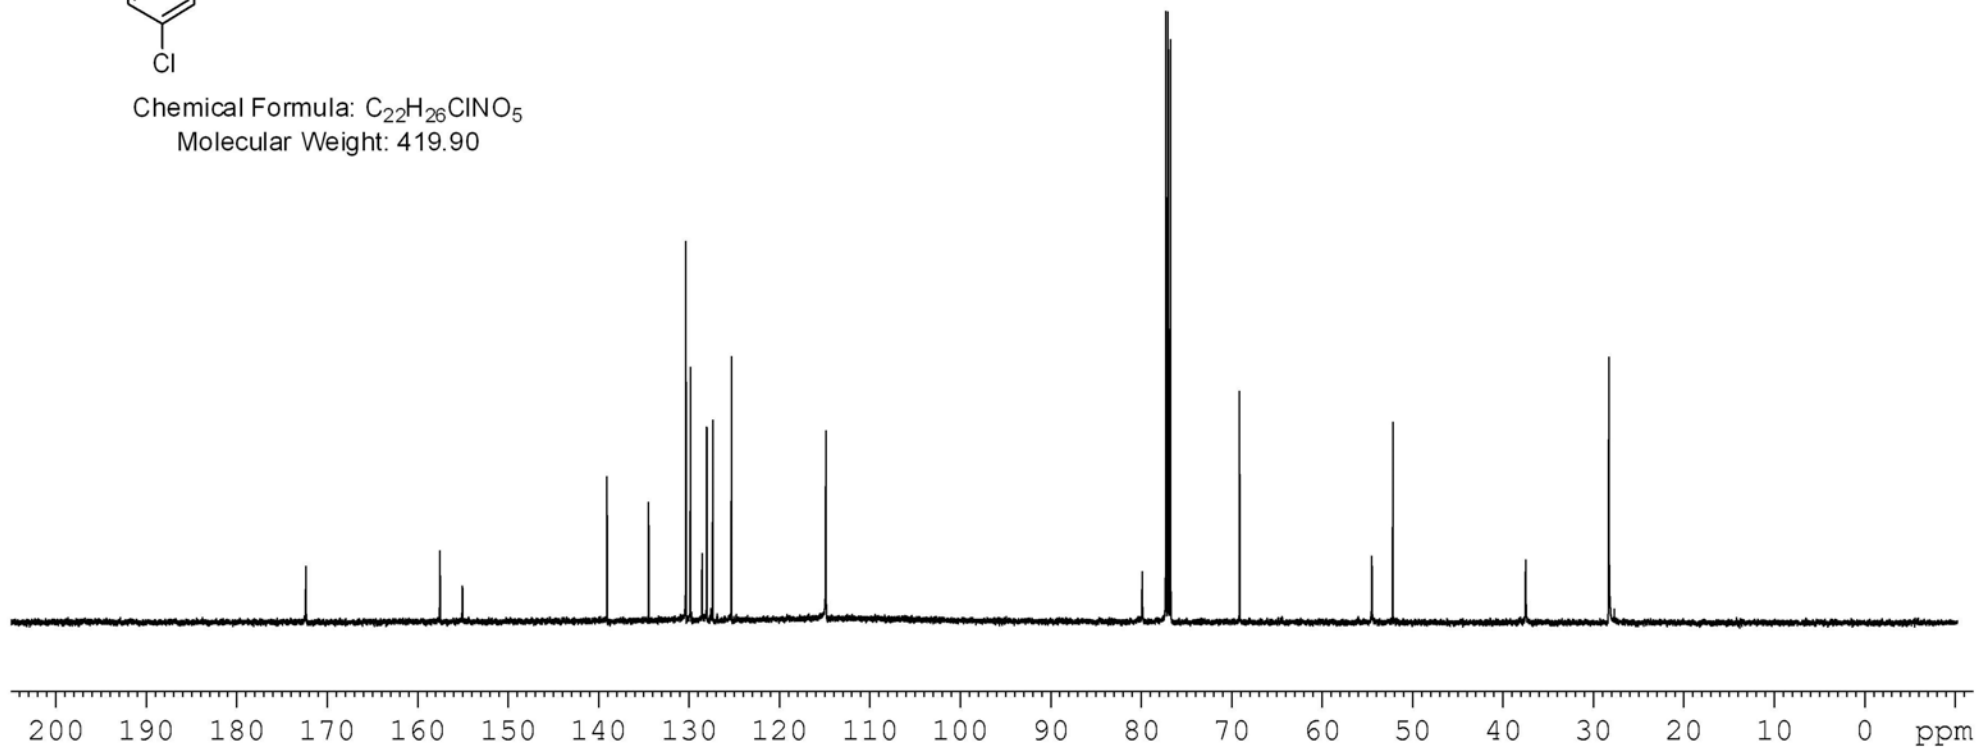

Solvent:  $\text{CDCl}_3$  & NMR: 500 MHz

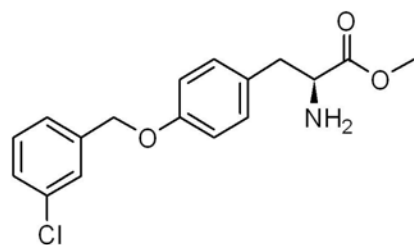

Chemical Formula:  $\text{C}_{17}\text{H}_{18}\text{ClNO}_3$   
Molecular Weight: 319.78

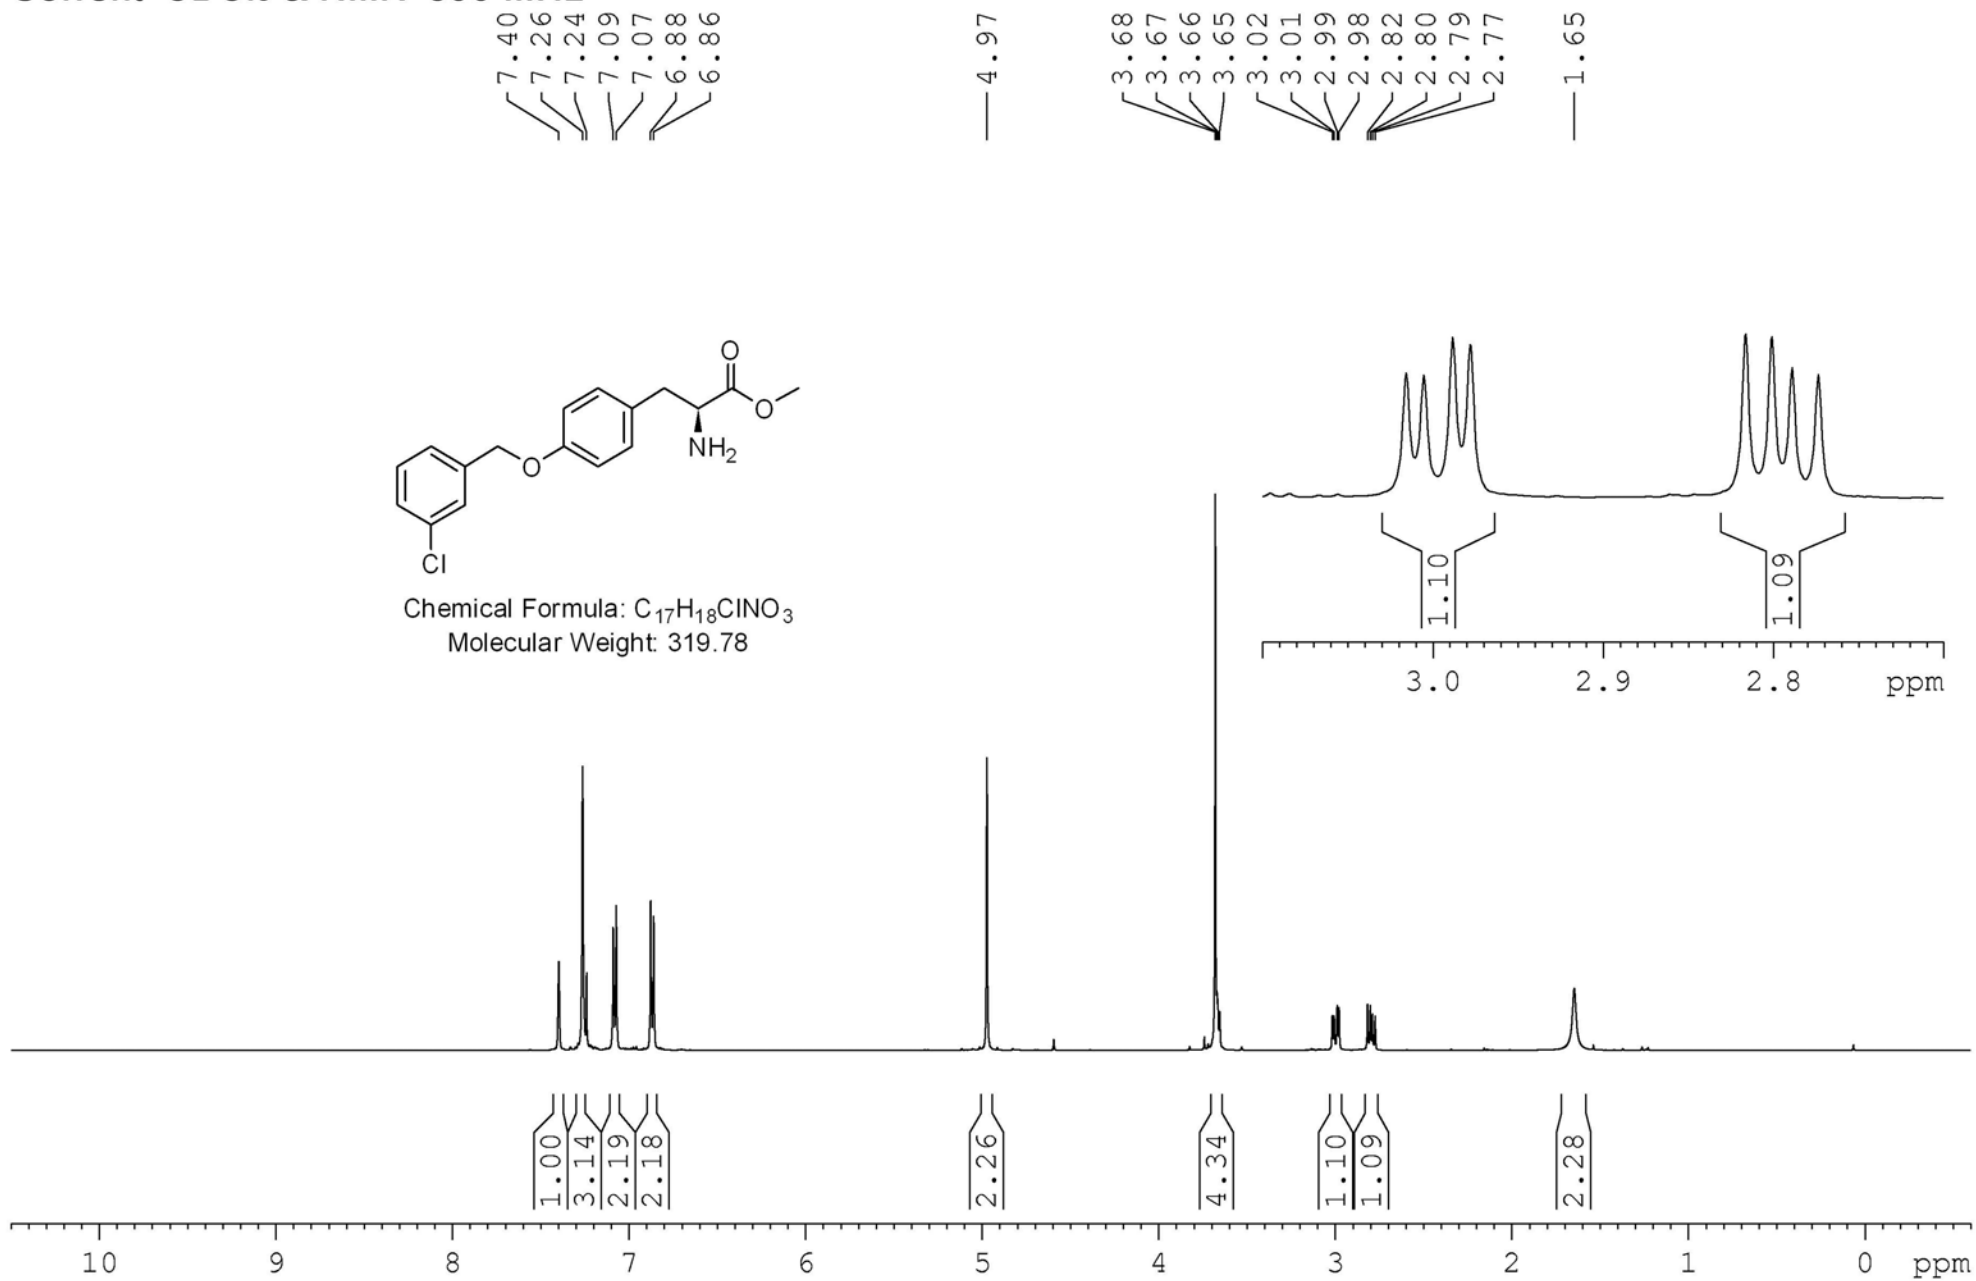

Solvent: CDCl<sub>3</sub> & NMR: 125 MHz

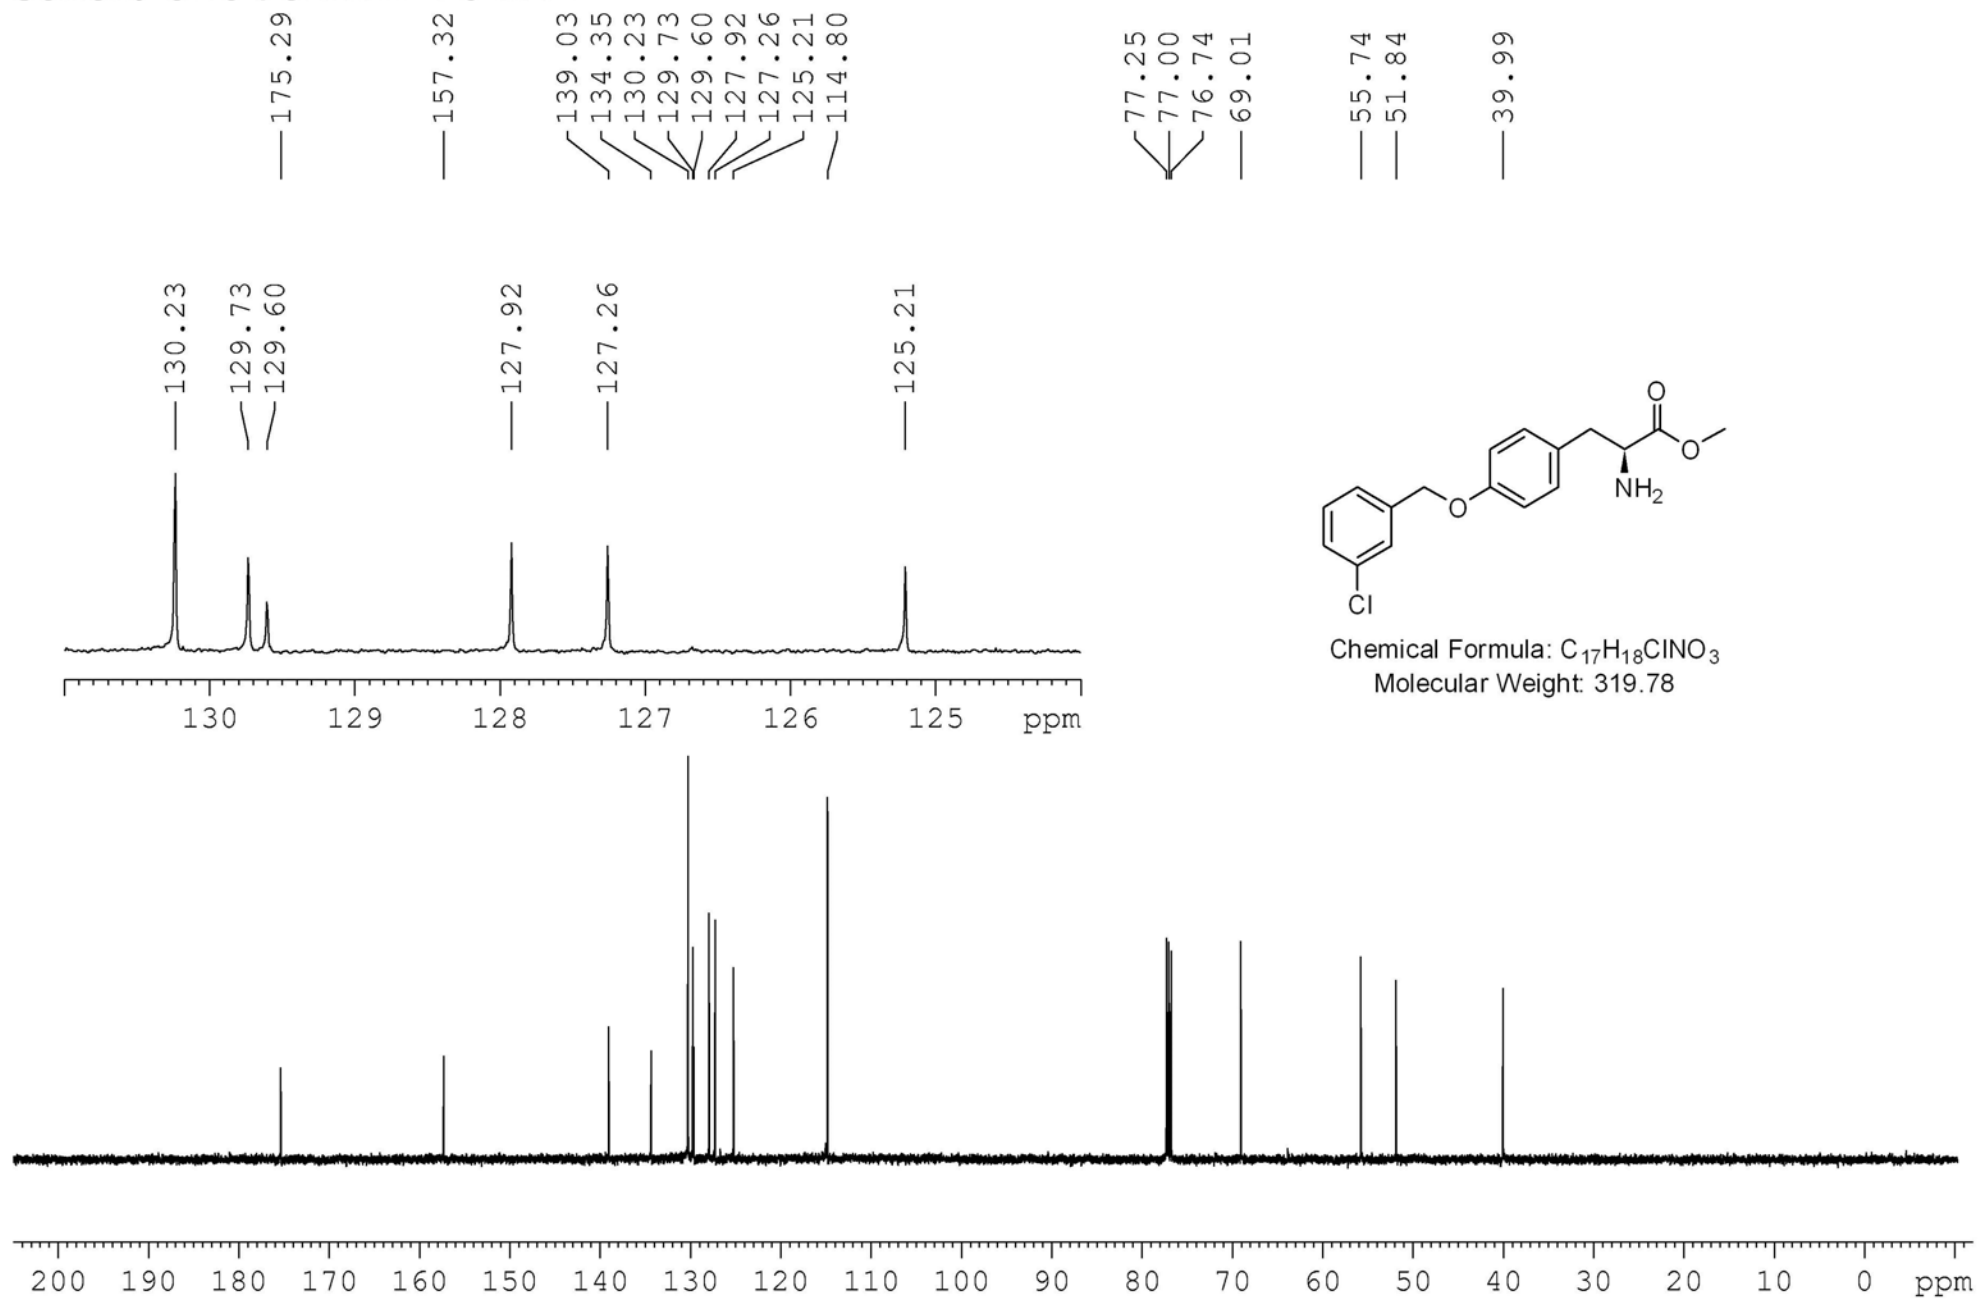

Solvent: CDCl<sub>3</sub> & NMR: 500 MHz

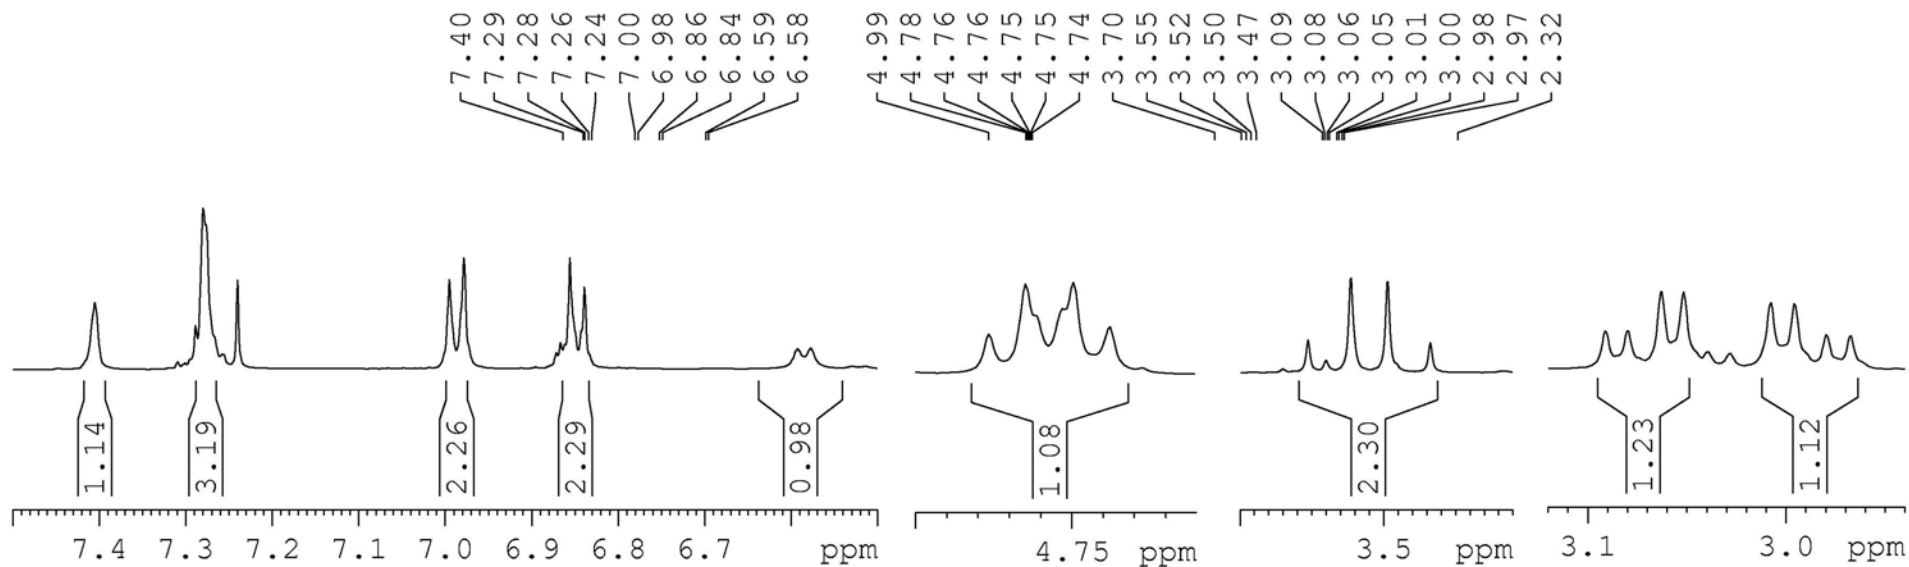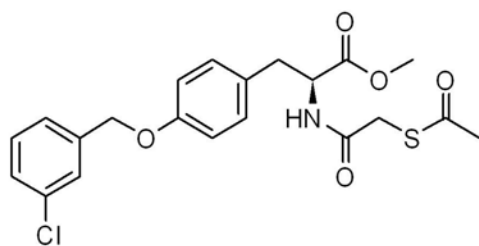

Chemical Formula: C<sub>21</sub>H<sub>22</sub>ClNO<sub>5</sub>S  
Molecular Weight: 435.92

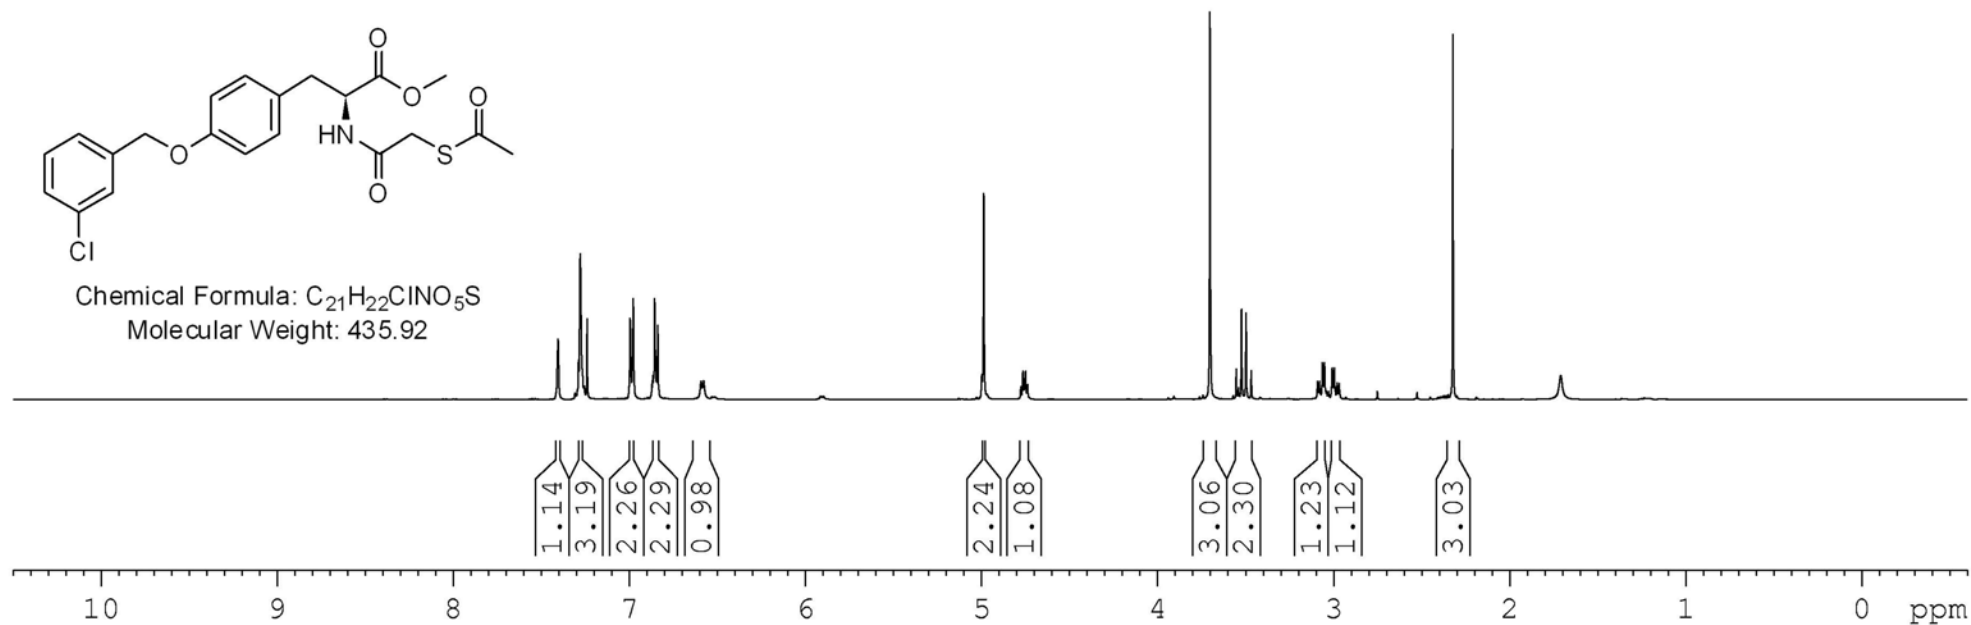

Solvent: CDCl<sub>3</sub> & NMR: 125 MHz

— 195.18

— 171.57

— 167.57

— 157.60

139.03

134.49

130.37

129.85

128.17

128.07

127.37

125.30

114.84

77.25

77.00

76.74

— 69.11

53.49

52.35

— 36.78

— 32.76

— 30.14

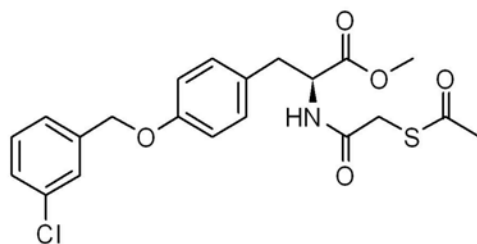

Chemical Formula: C<sub>21</sub>H<sub>22</sub>ClNO<sub>5</sub>S

Molecular Weight: 435.92

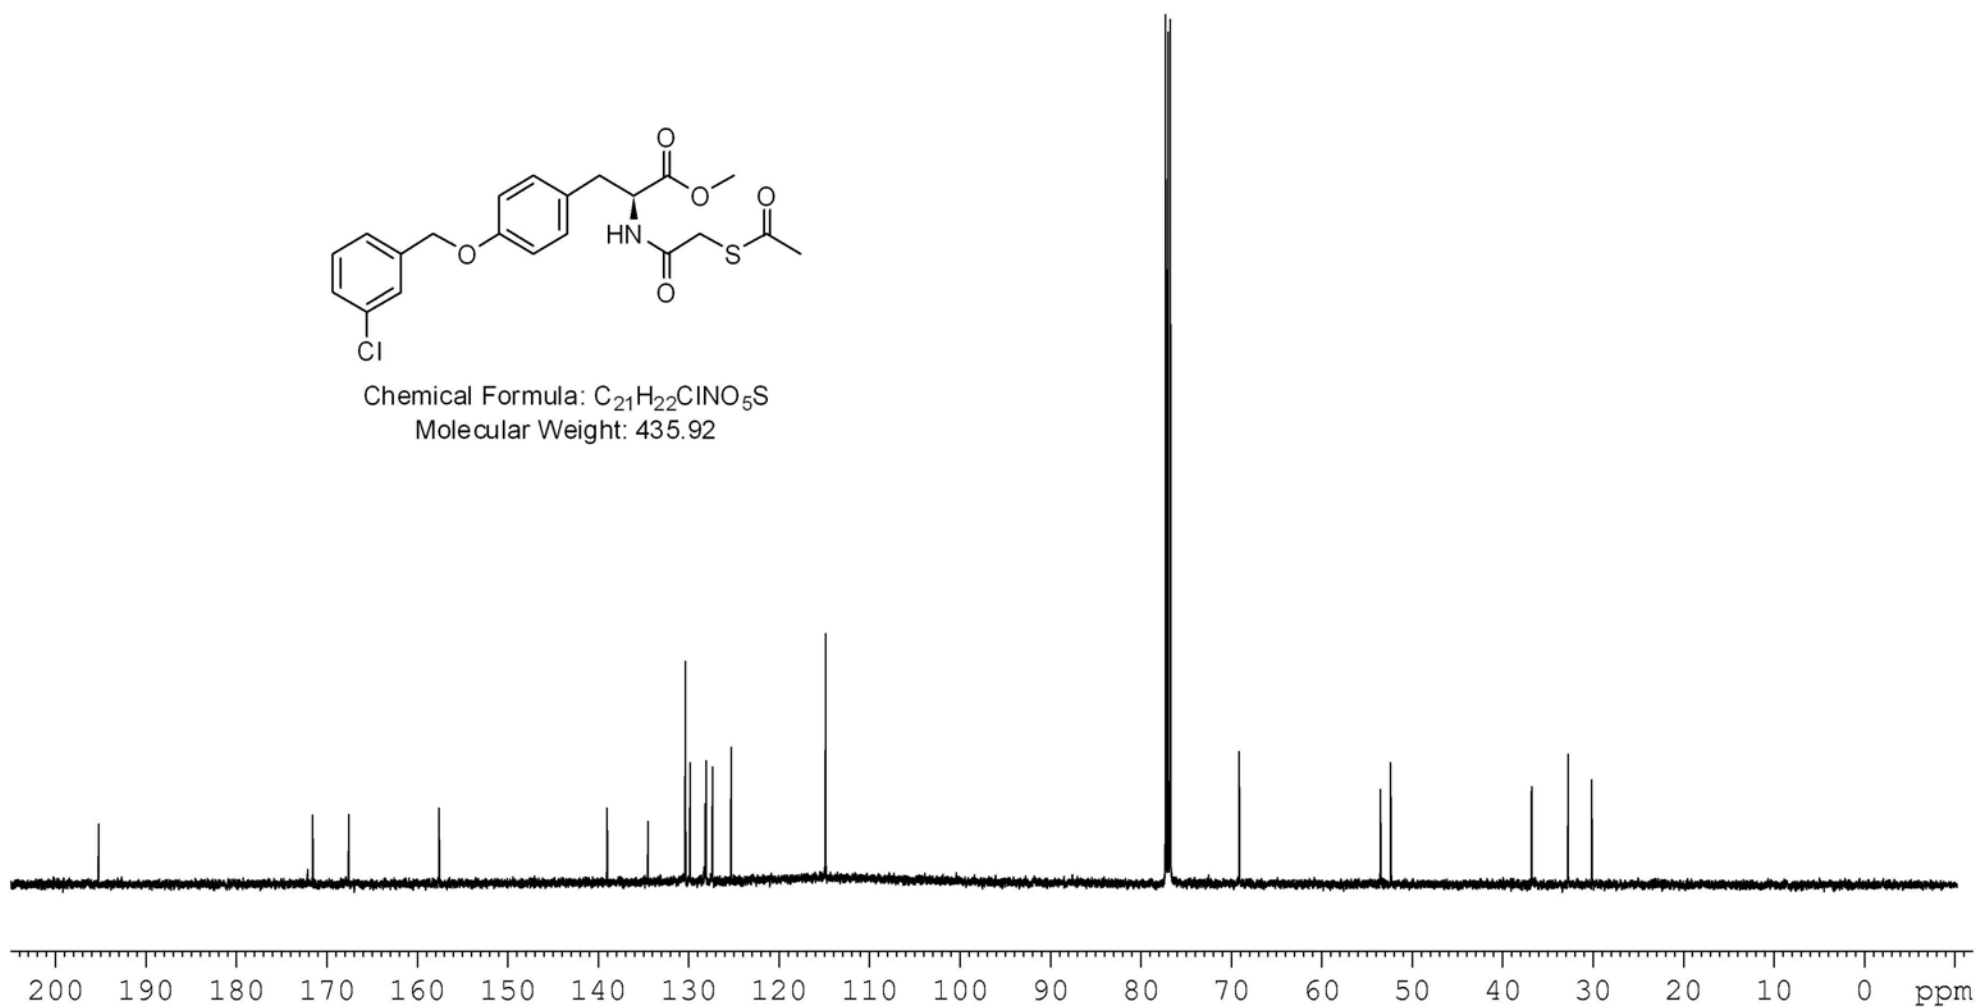

Solvent: CD<sub>3</sub>OD & NMR: 500 MHz

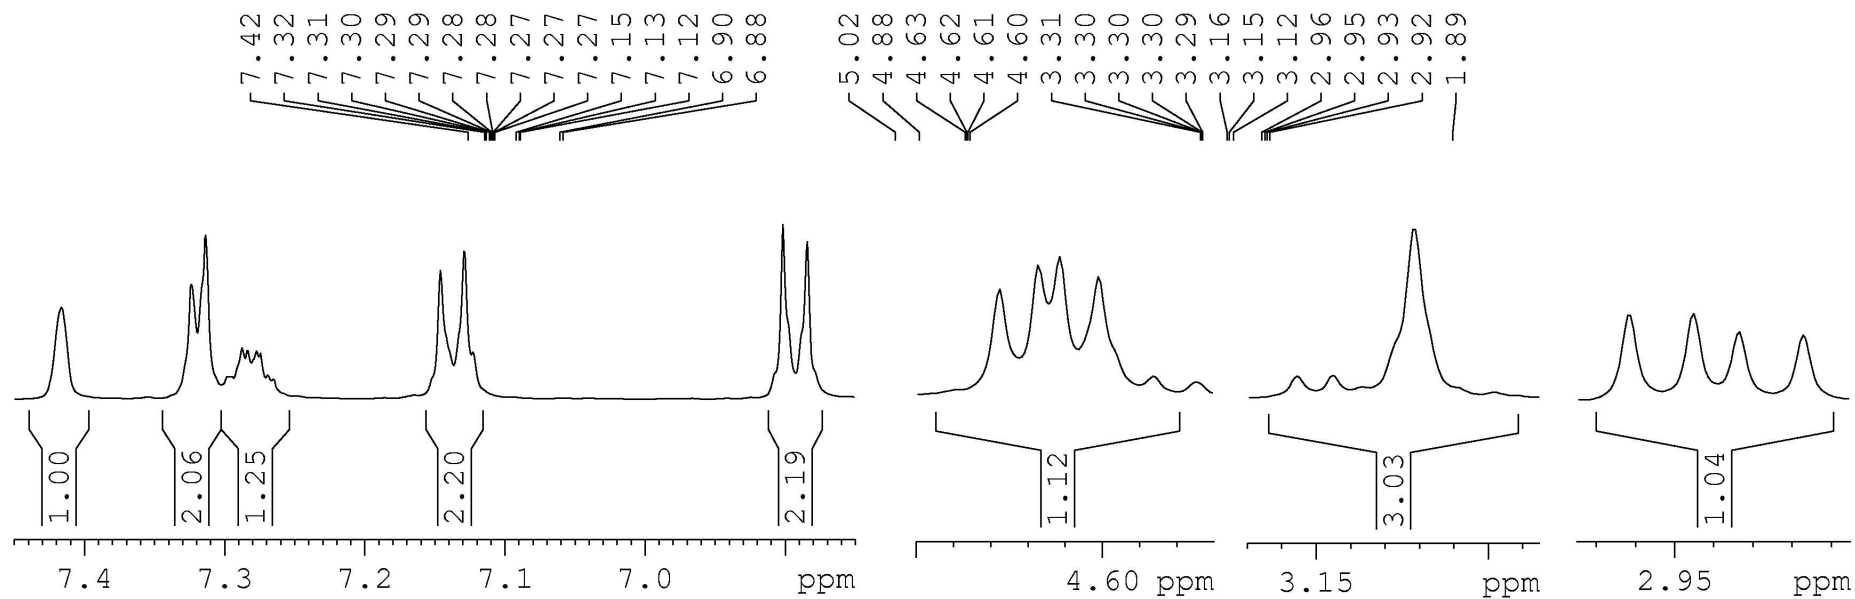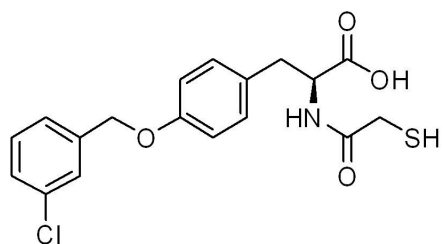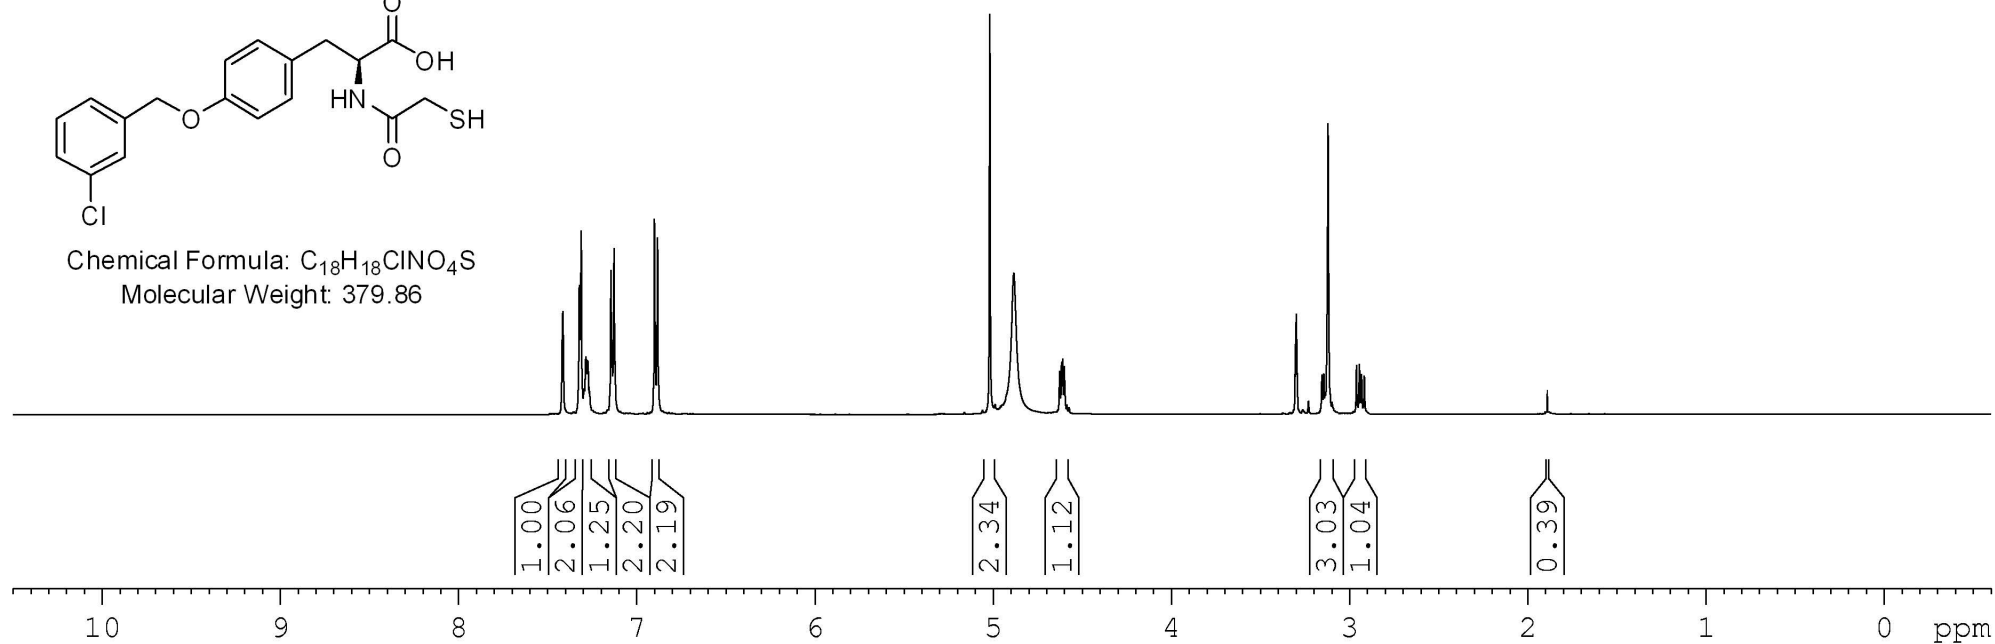

Solvent: CD<sub>3</sub>OD & NMR: 125 MHz

174.34  
172.87  
158.90  
141.20  
135.36  
131.47  
131.02  
130.55  
128.80  
128.27  
126.63  
115.89

69.98  
55.27  
37.49  
28.00

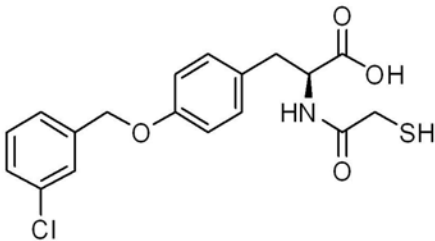

Chemical Formula: C<sub>18</sub>H<sub>18</sub>ClNO<sub>4</sub>S  
Molecular Weight: 379.86

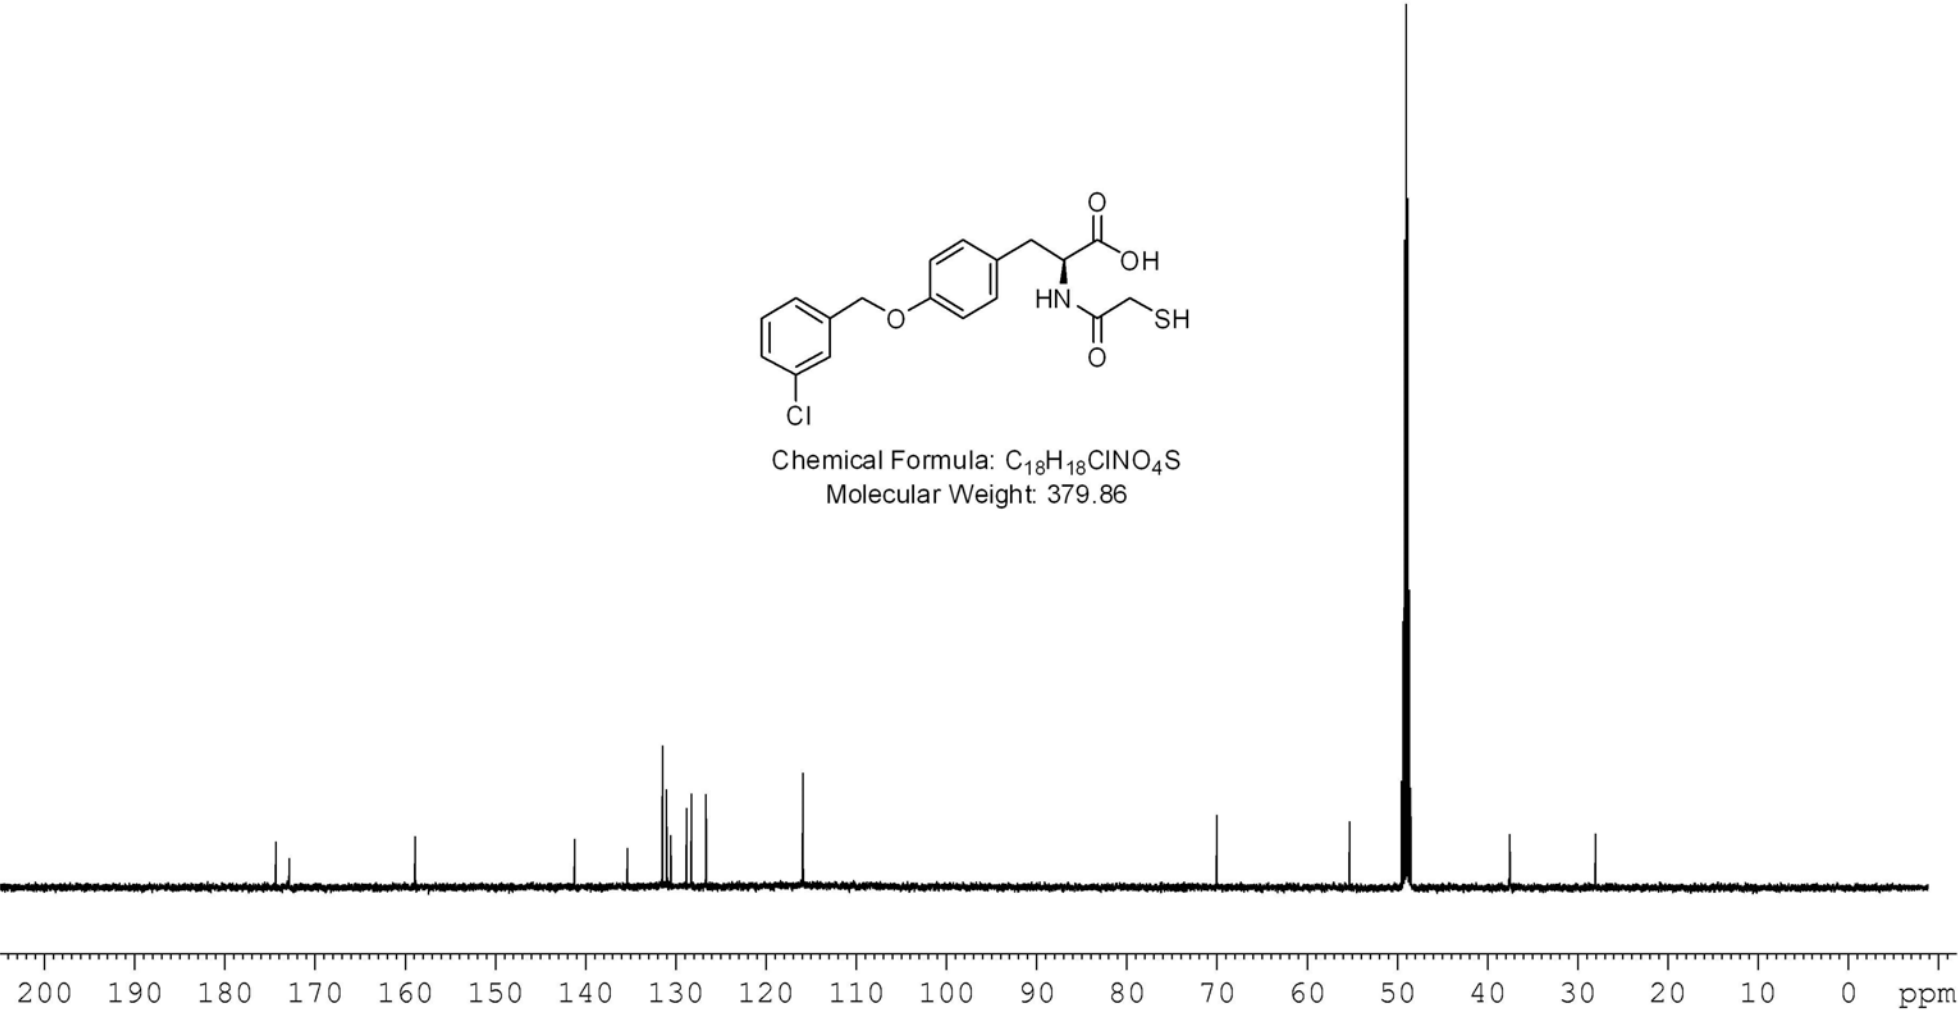

Solvent: CDCl<sub>3</sub> & NMR: 400 MHz

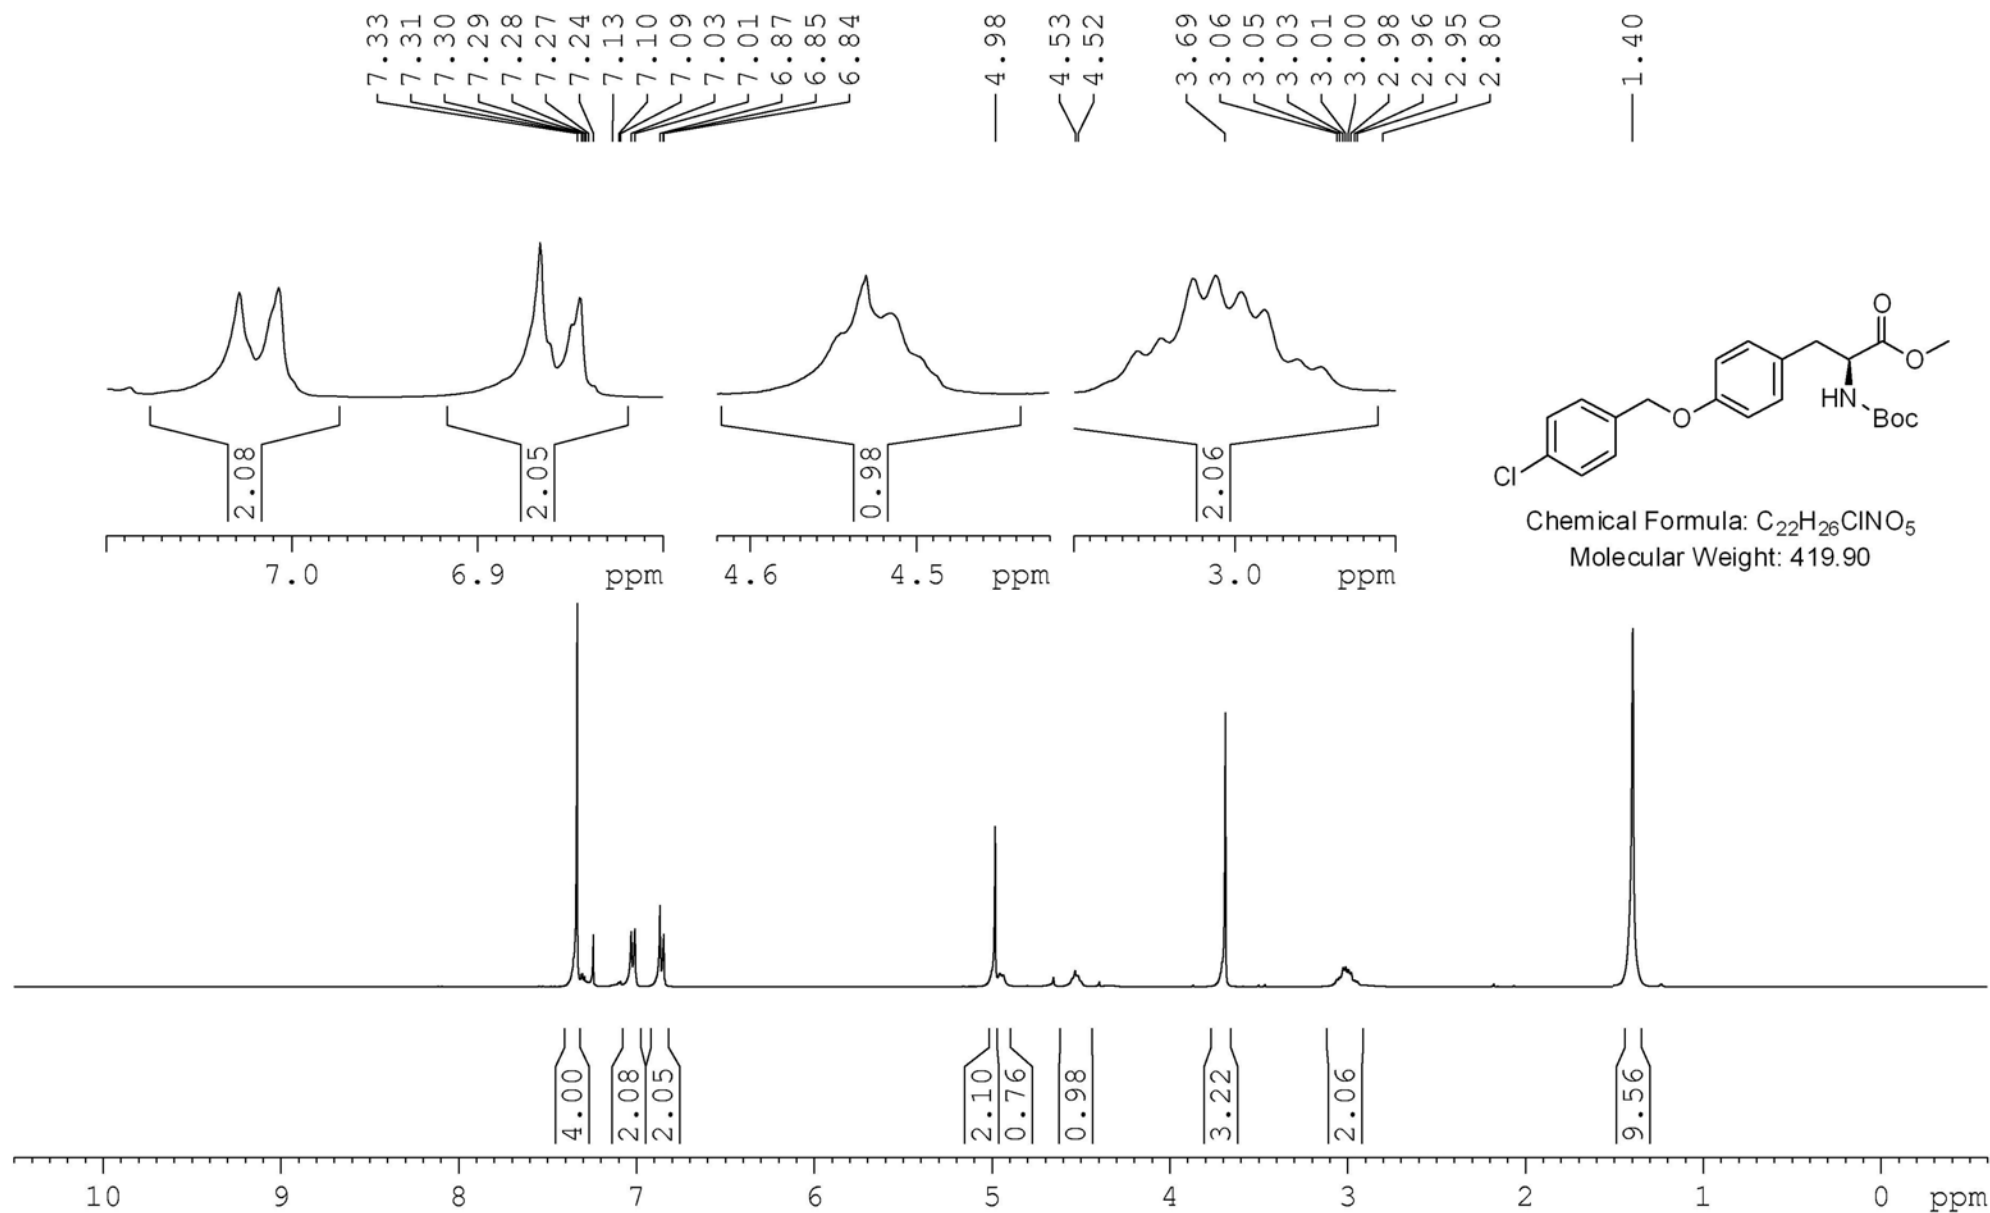

Solvent: CDCl<sub>3</sub> & NMR: 100 MHz

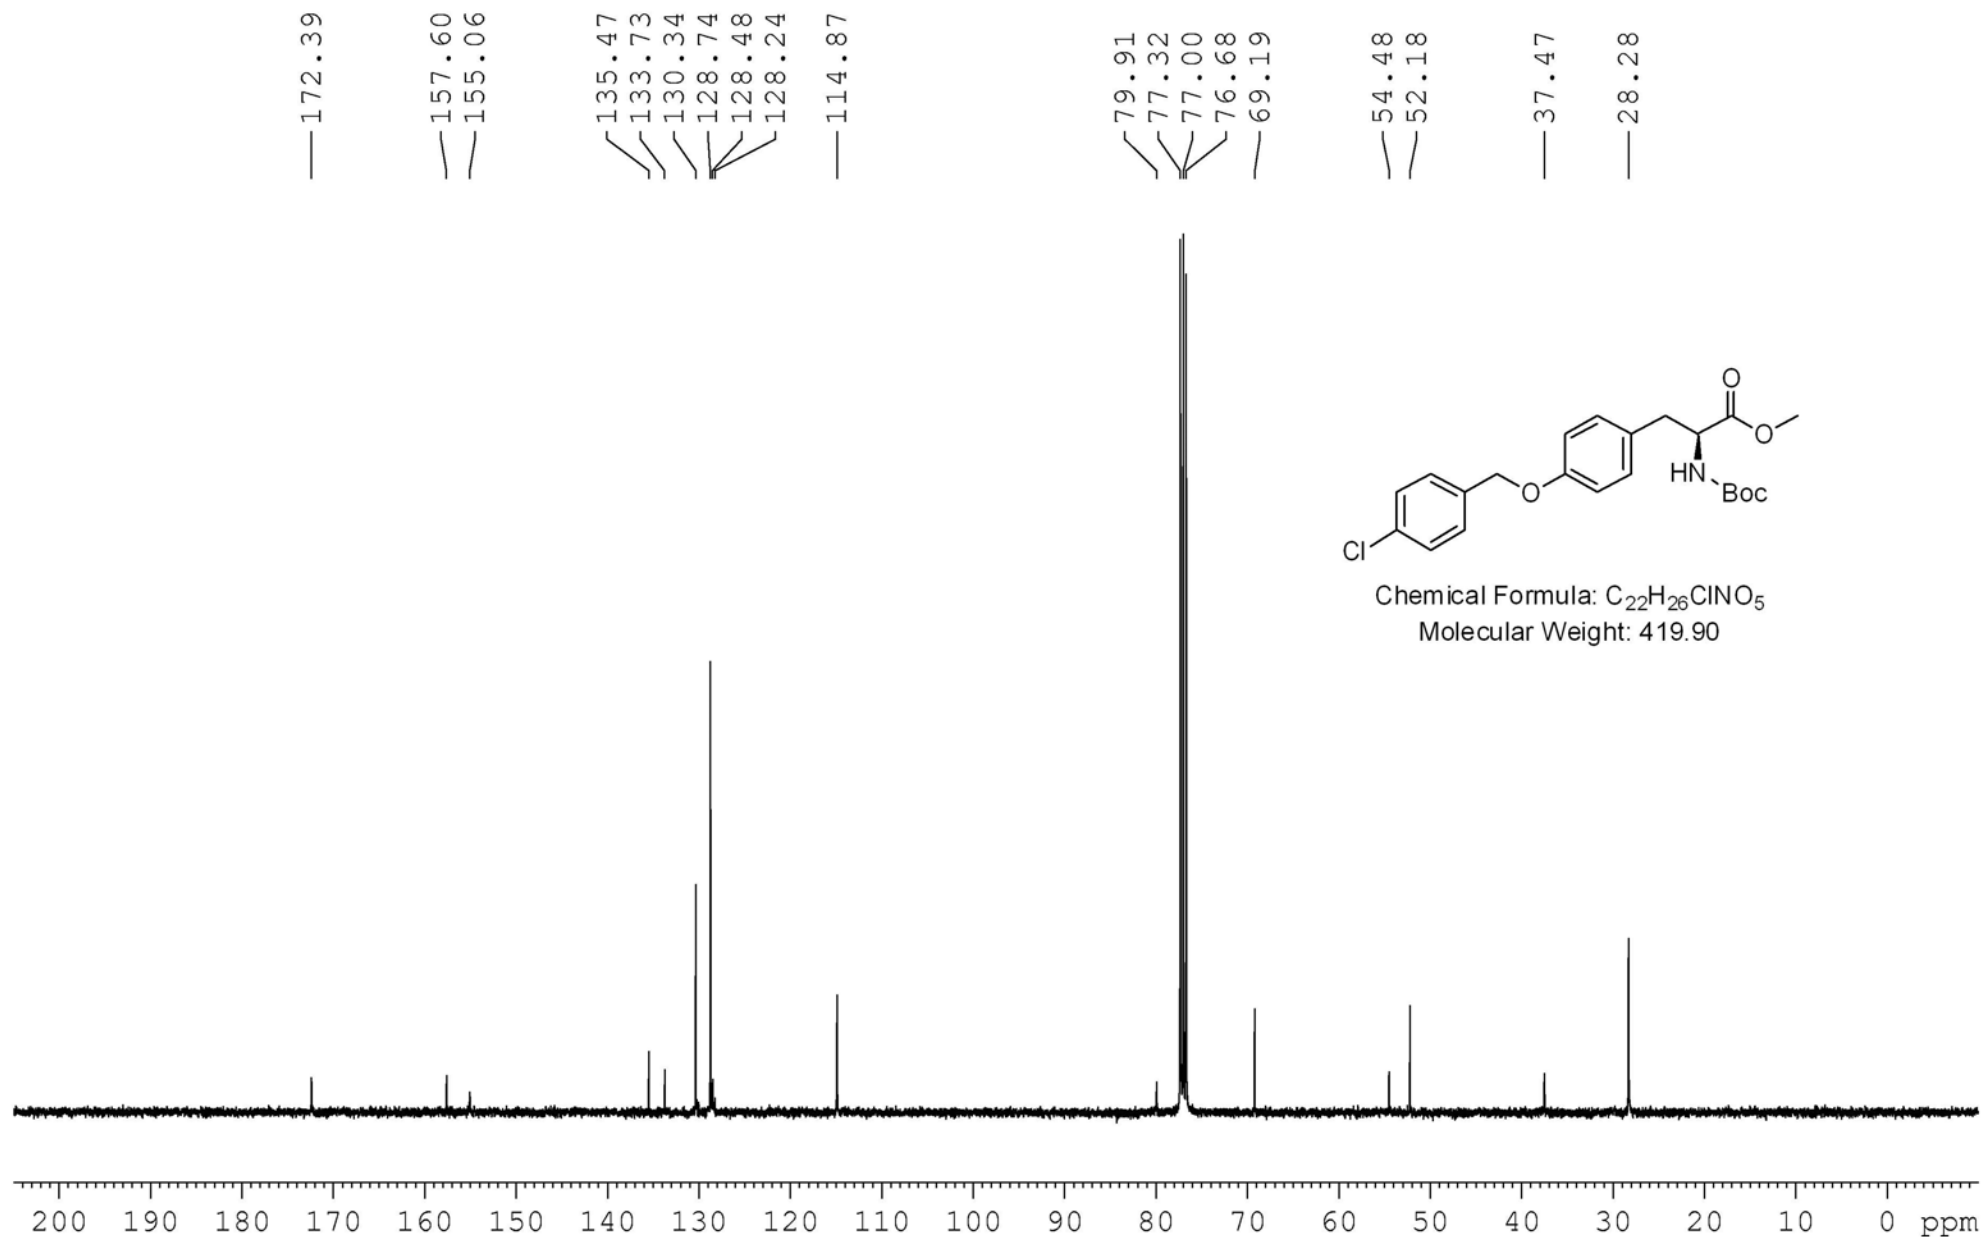

Solvent: CDCl<sub>3</sub> & NMR: 500 MHz

7.33  
7.09  
7.08  
6.88  
6.86

4.98

3.69  
3.03  
3.02  
3.00  
2.99  
2.83  
2.81  
2.80  
2.78  
1.71

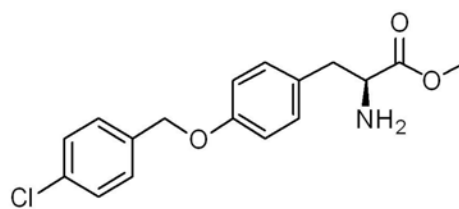

Chemical Formula: C<sub>17</sub>H<sub>18</sub>ClNO<sub>3</sub>  
Molecular Weight: 319.78

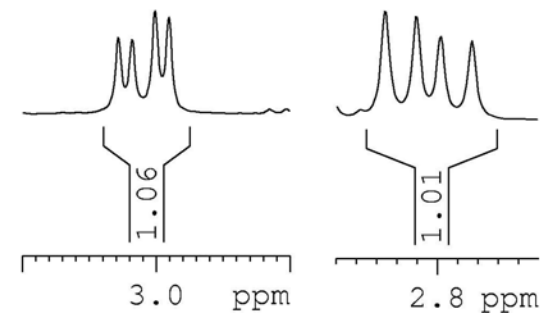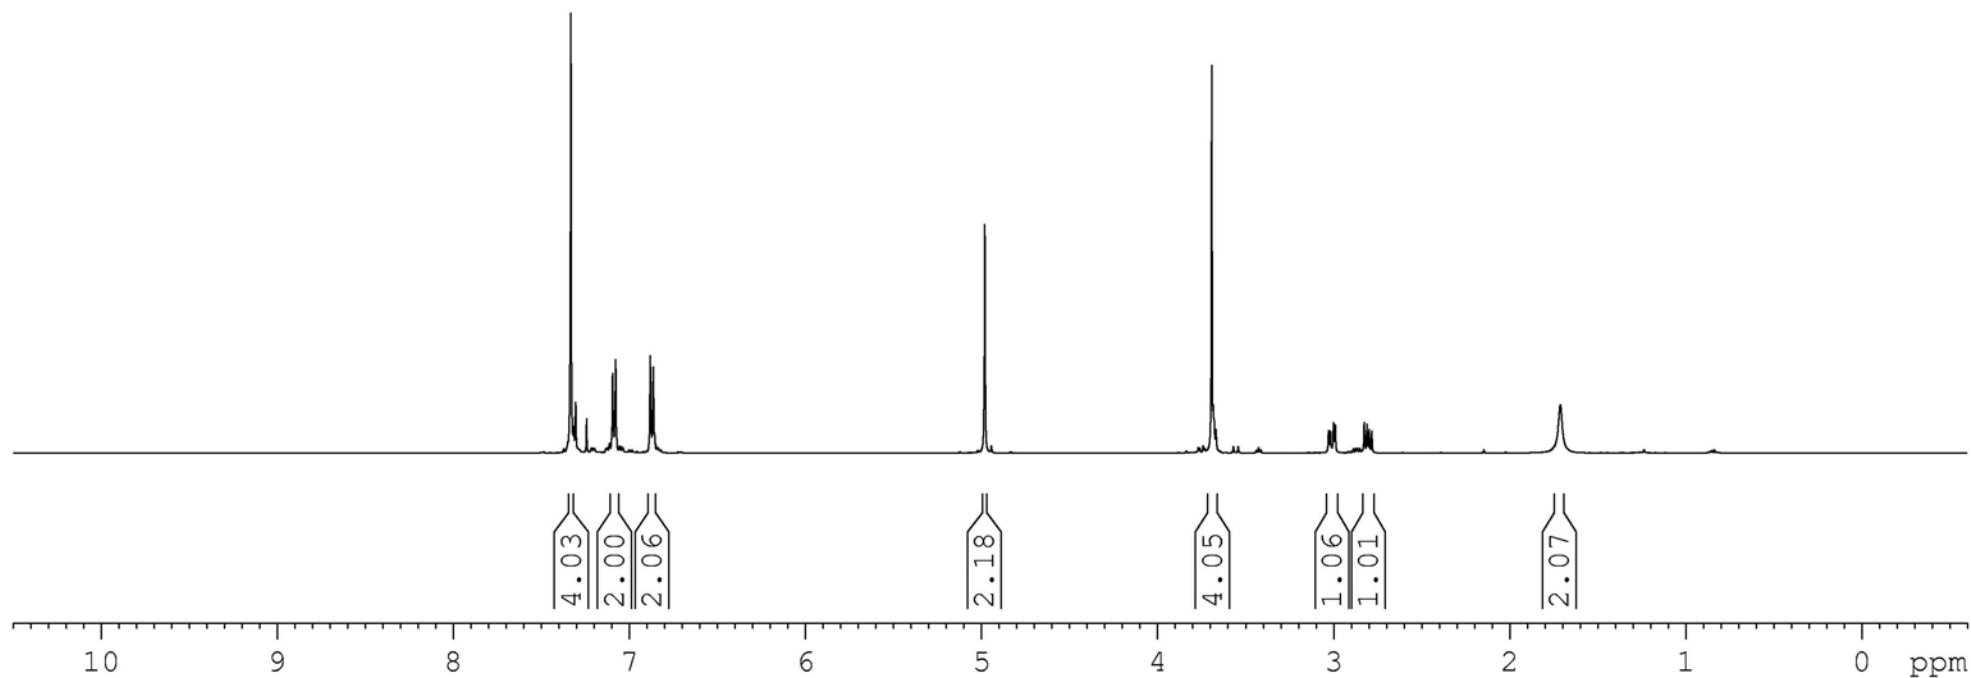

Solvent: CDCl<sub>3</sub> & NMR: 125 MHz

—175.33

—157.47

135.50

133.69

130.30

129.56

128.88

128.71

—114.91

77.25

77.00

76.74

—69.18

—55.80

—51.95

—40.01

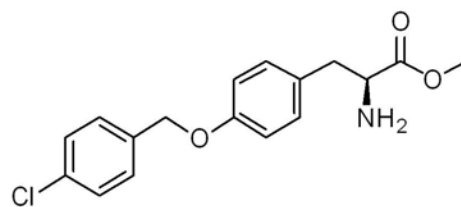

Chemical Formula: C<sub>17</sub>H<sub>18</sub>ClNO<sub>3</sub>  
Molecular Weight: 319.78

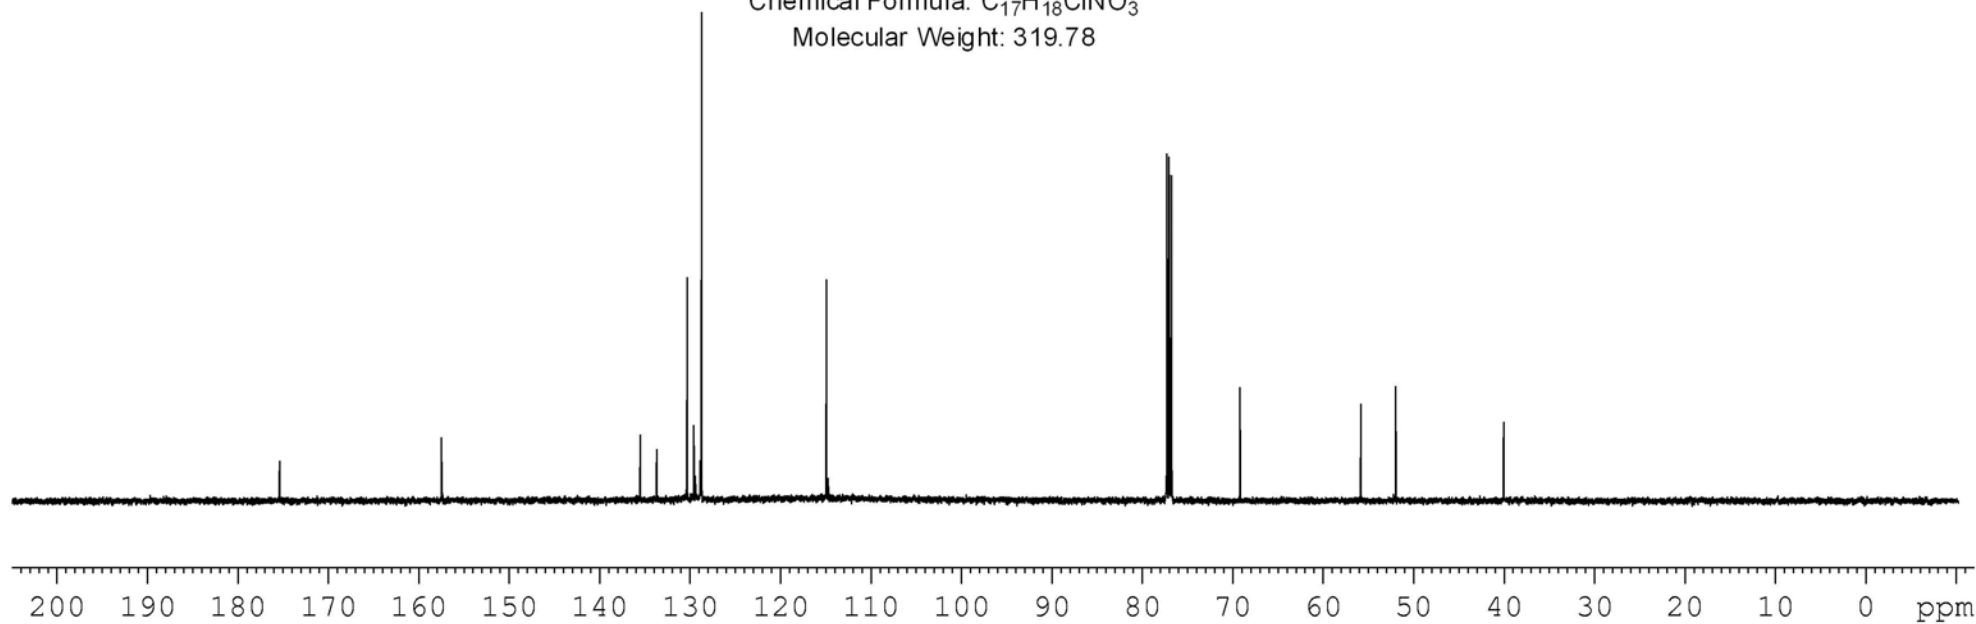

Solvent: CDCl<sub>3</sub> & NMR: 500 MHz

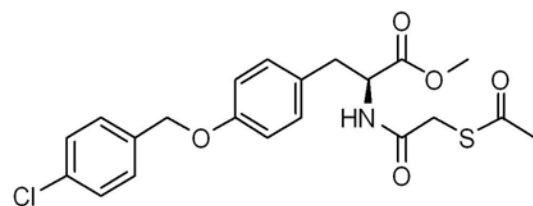

Chemical Formula: C<sub>21</sub>H<sub>22</sub>ClNO<sub>5</sub>S  
Molecular Weight: 435.92

7.33  
7.24  
6.99  
6.97  
6.85  
6.83

4.98  
4.77  
4.76  
4.76  
4.75  
4.75  
4.74  
3.70  
3.55  
3.54  
3.52  
3.50  
3.47  
3.09  
3.08  
3.06  
3.05  
3.00  
2.99  
2.99  
2.97  
2.96  
2.32

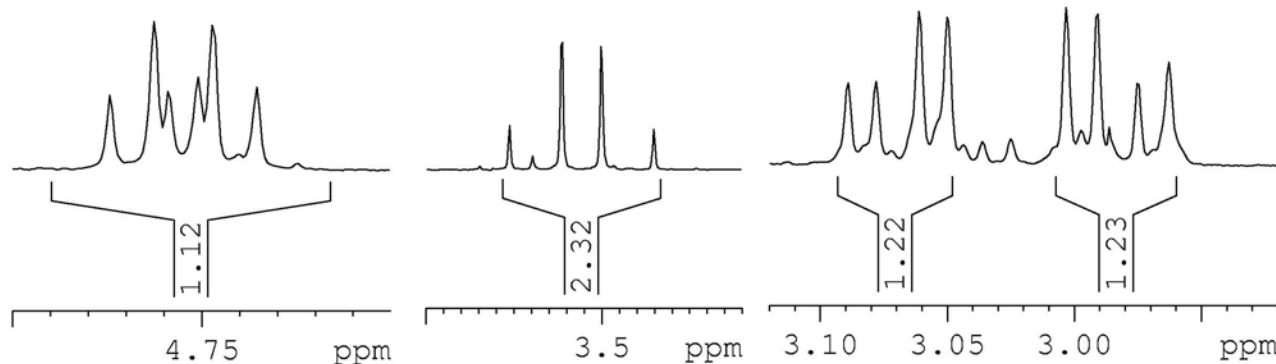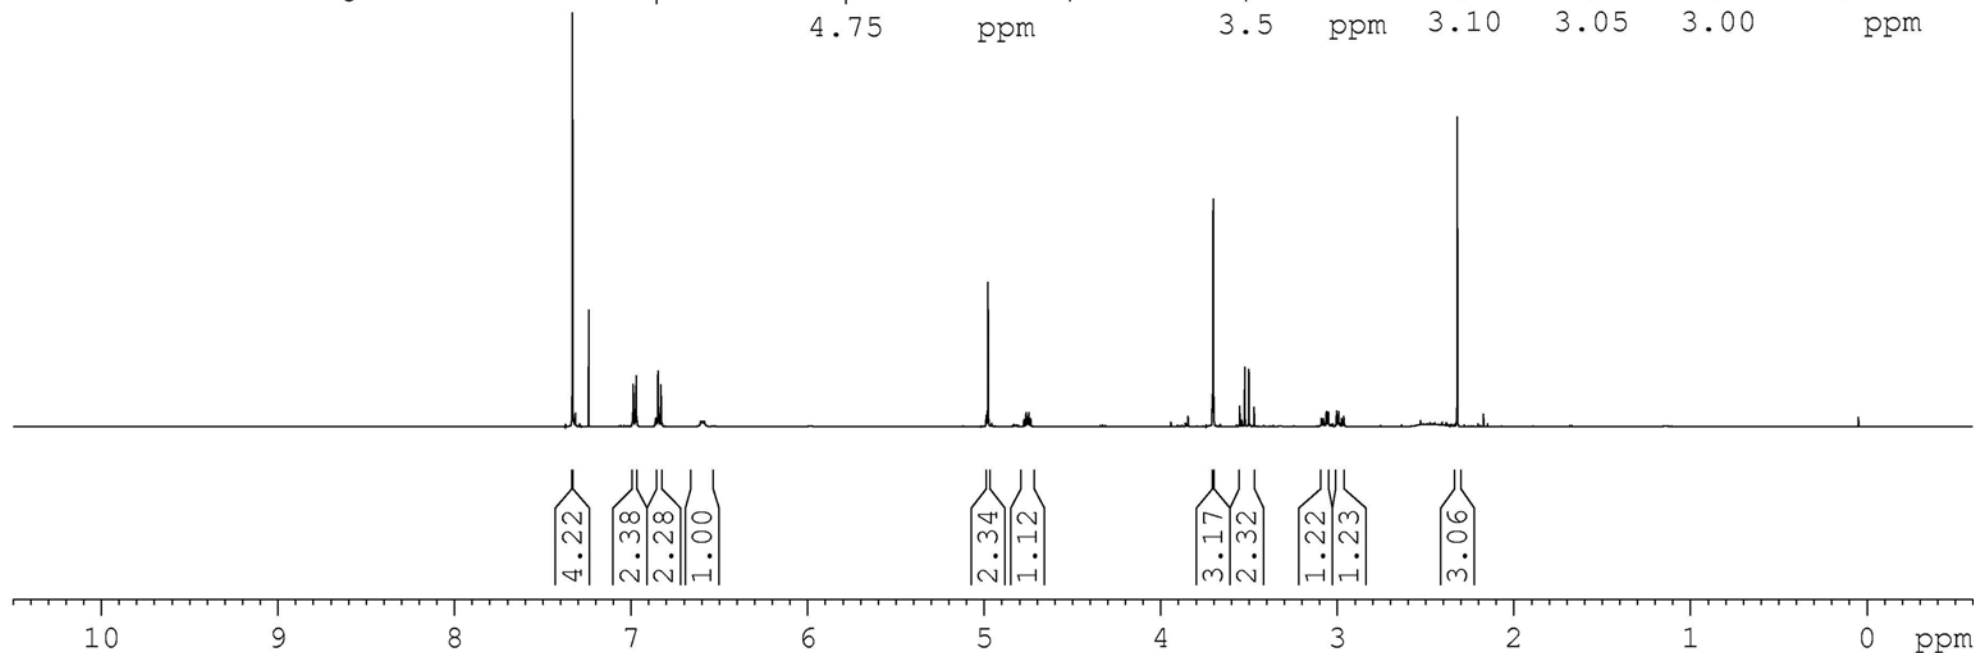

Chemical structure of the compound is shown above the spectrum. The chemical formula is  $C_{21}H_{22}ClNO_5S$  and the molecular weight is 435.92.

$^{13}C$  NMR peaks (ppm): 195.19, 171.56, 167.66, 157.65, 135.44, 133.76, 130.35, 130.29, 128.74, 128.09, 114.86, 77.25, 77.00, 76.74, 69.18, 53.51, 52.37, 36.78, 32.74, 30.13.

Solvent: CD<sub>3</sub>OD & NMR: 500 MHz

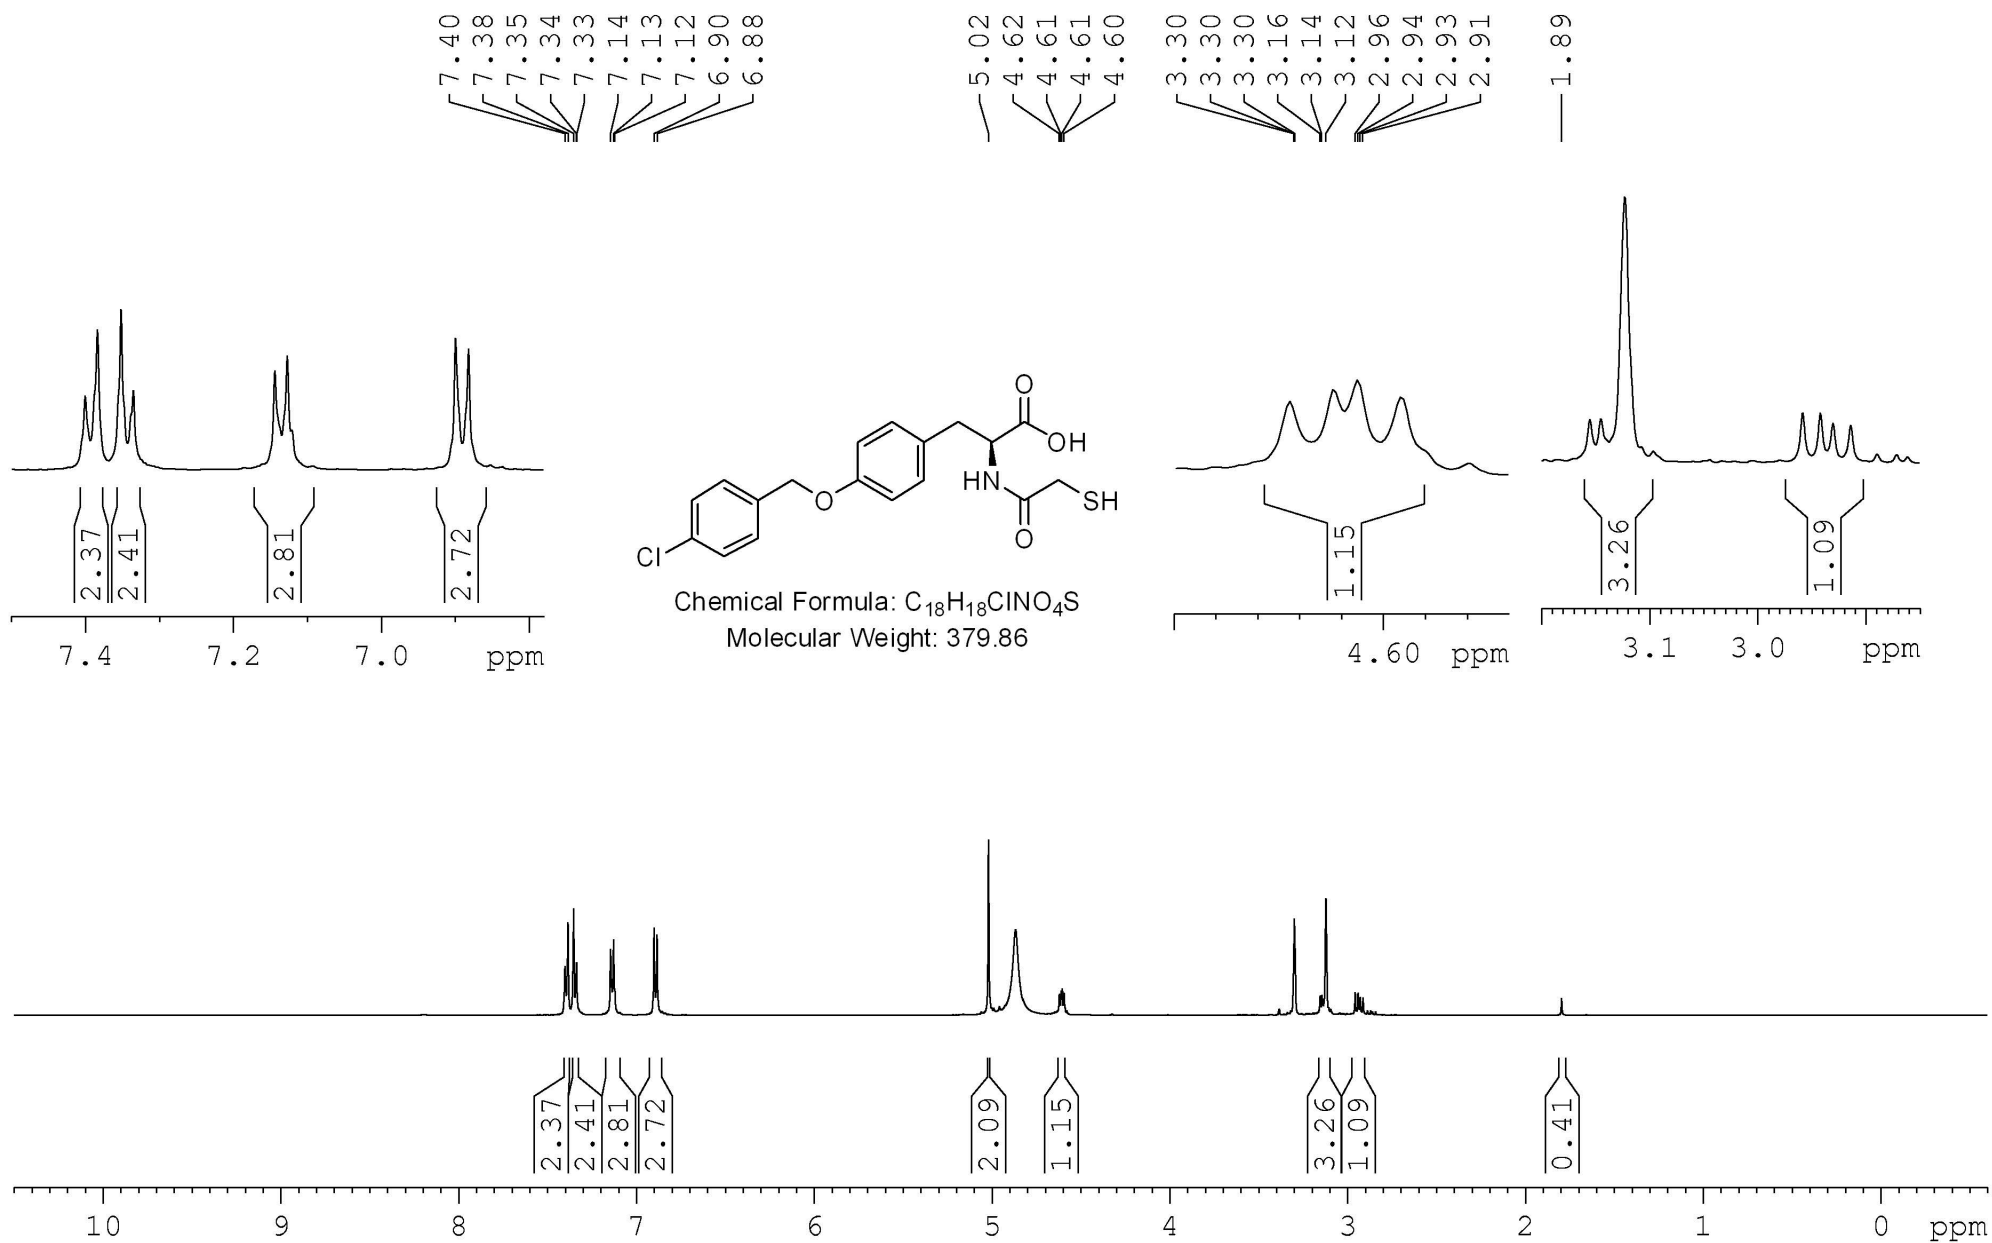

Solvent: CD<sub>3</sub>OD & NMR: 125 MHz

174.34  
172.89

159.01

137.64  
134.55  
131.45  
130.52  
130.07  
129.57

115.93

70.11

55.30

37.52

28.00

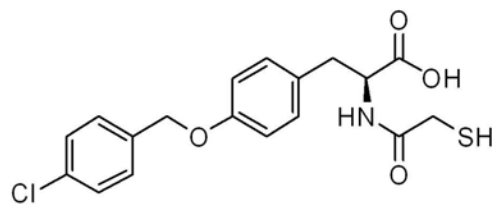

Chemical Formula: C<sub>18</sub>H<sub>18</sub>ClNO<sub>4</sub>S

Molecular Weight: 379.86

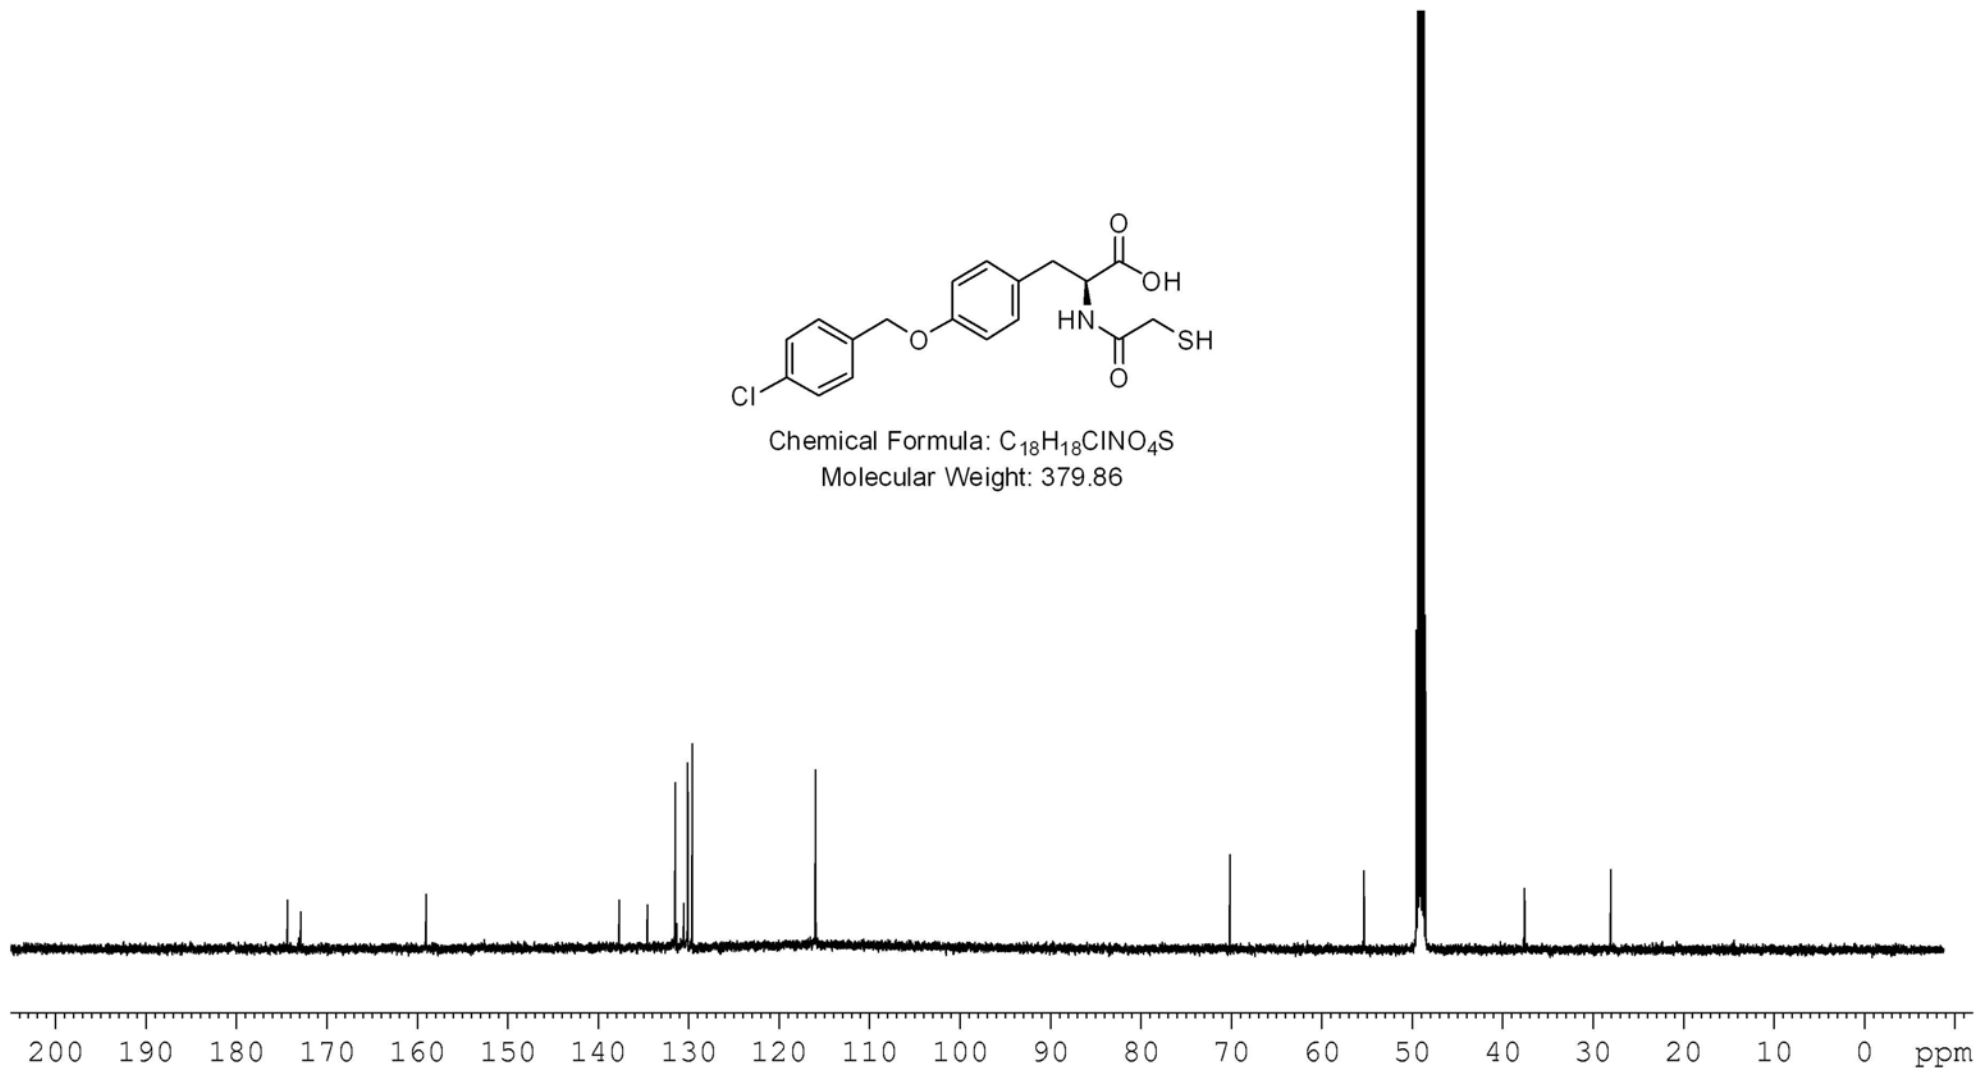

Solvent: CDCl<sub>3</sub> & NMR: 400 MHz

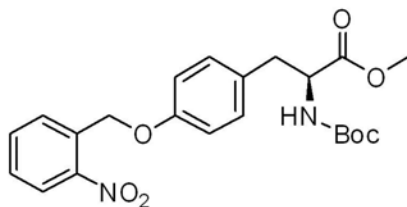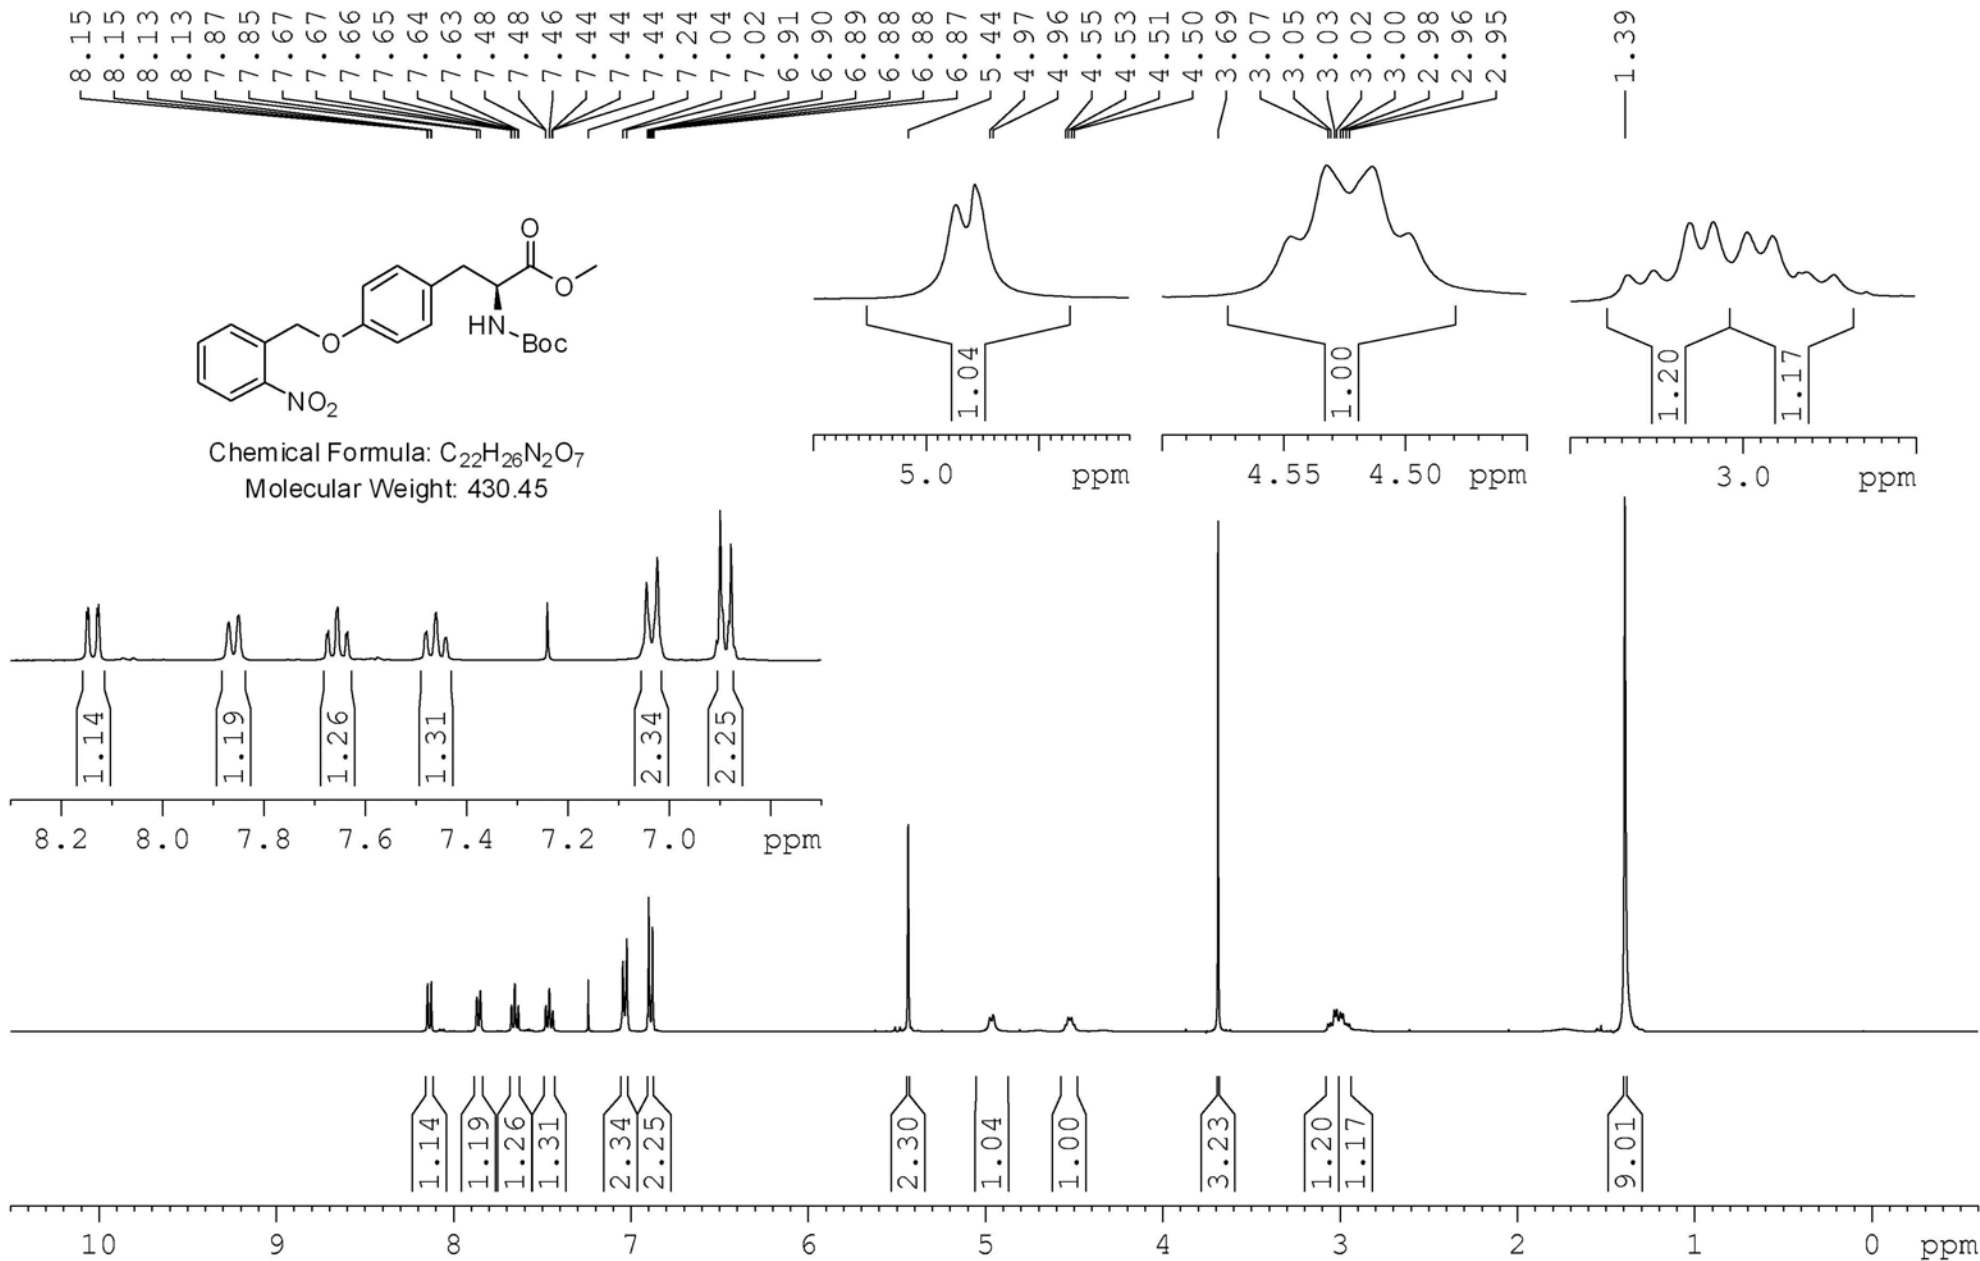

Solvent: CDCl<sub>3</sub> & NMR: 100 MHz

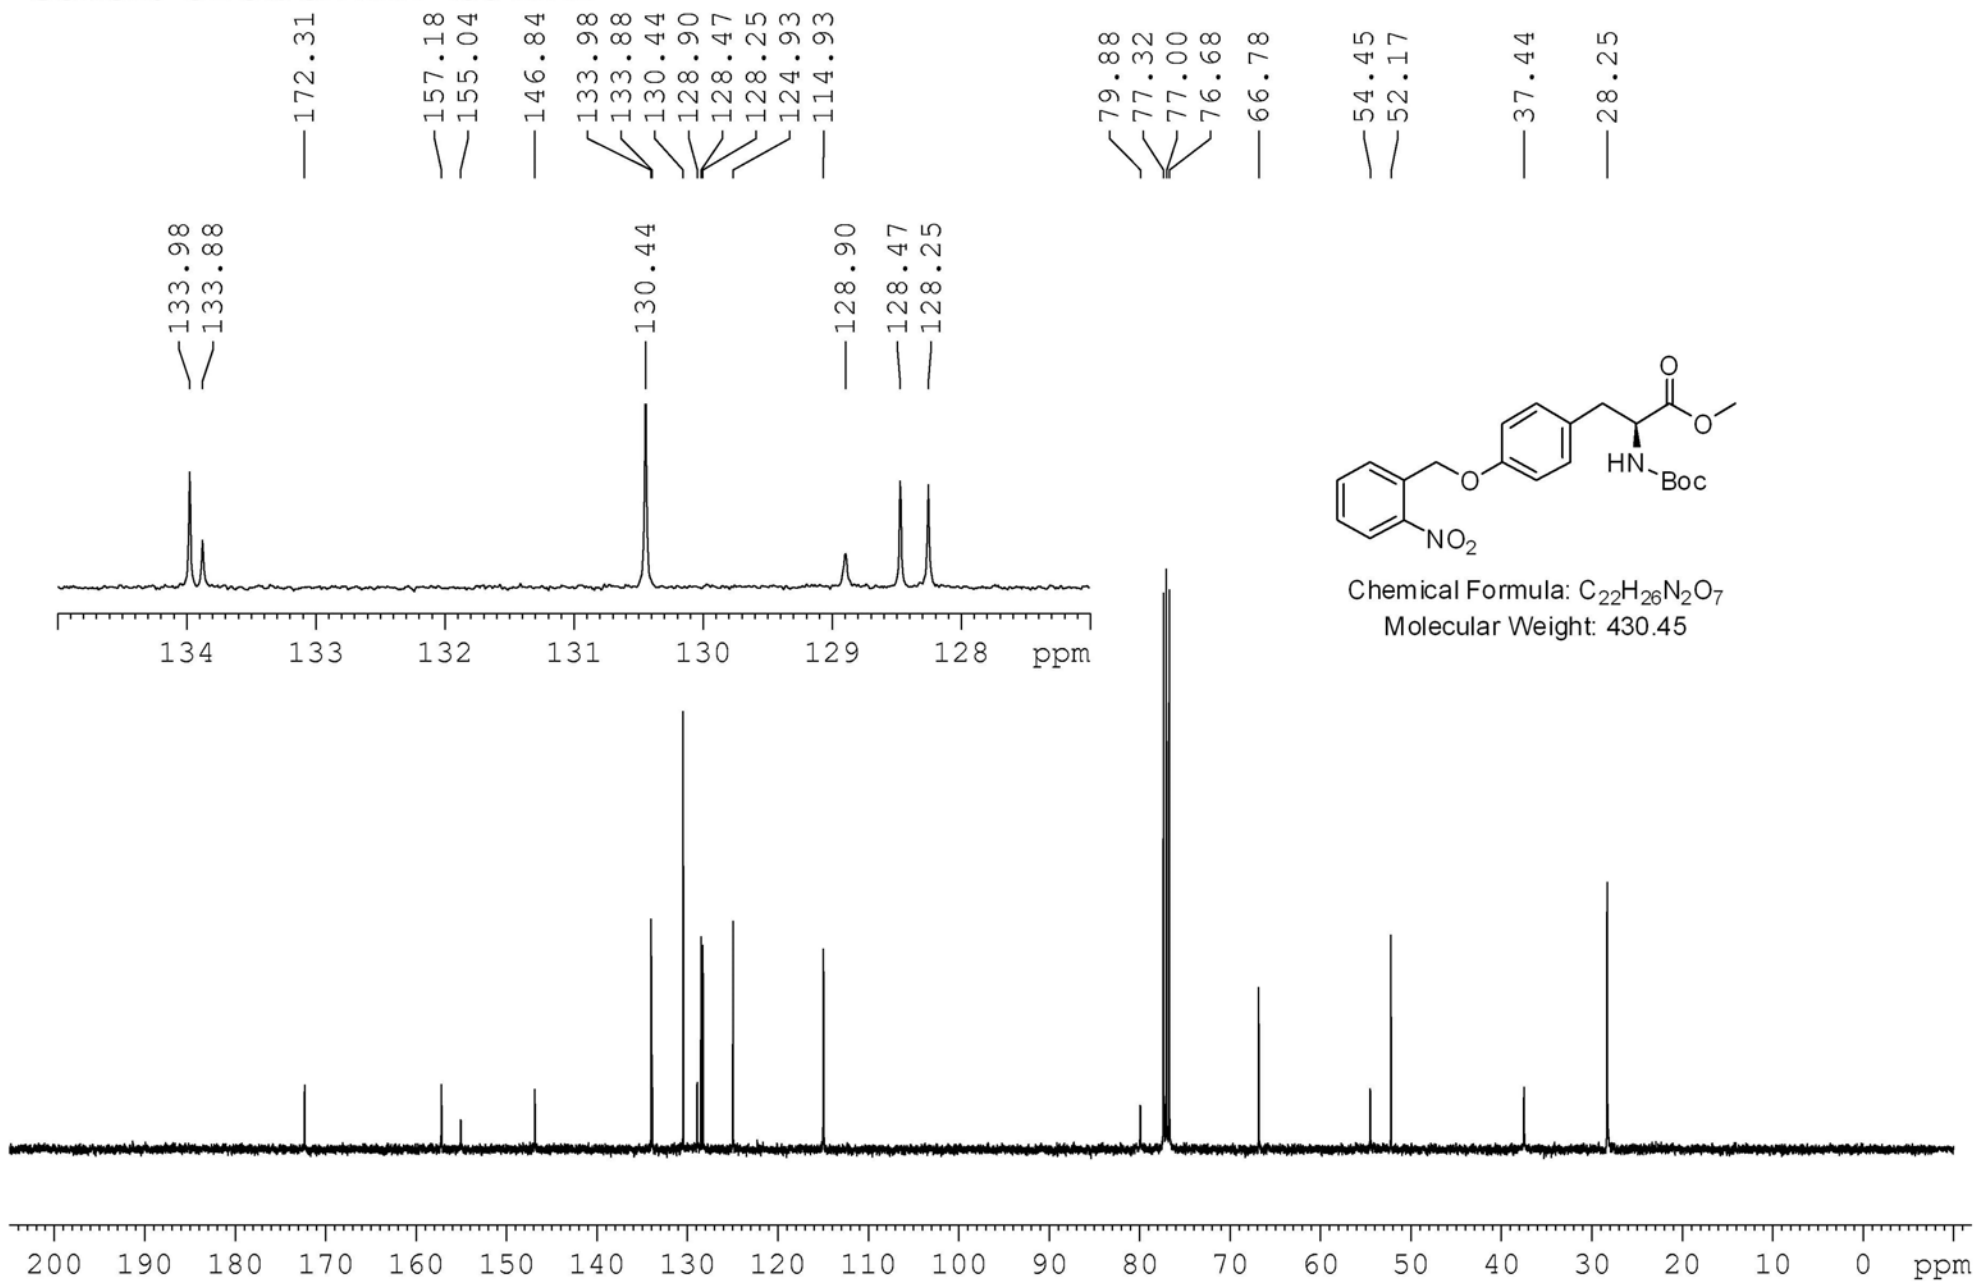

Solvent: CDCl<sub>3</sub> & NMR: 500 MHz

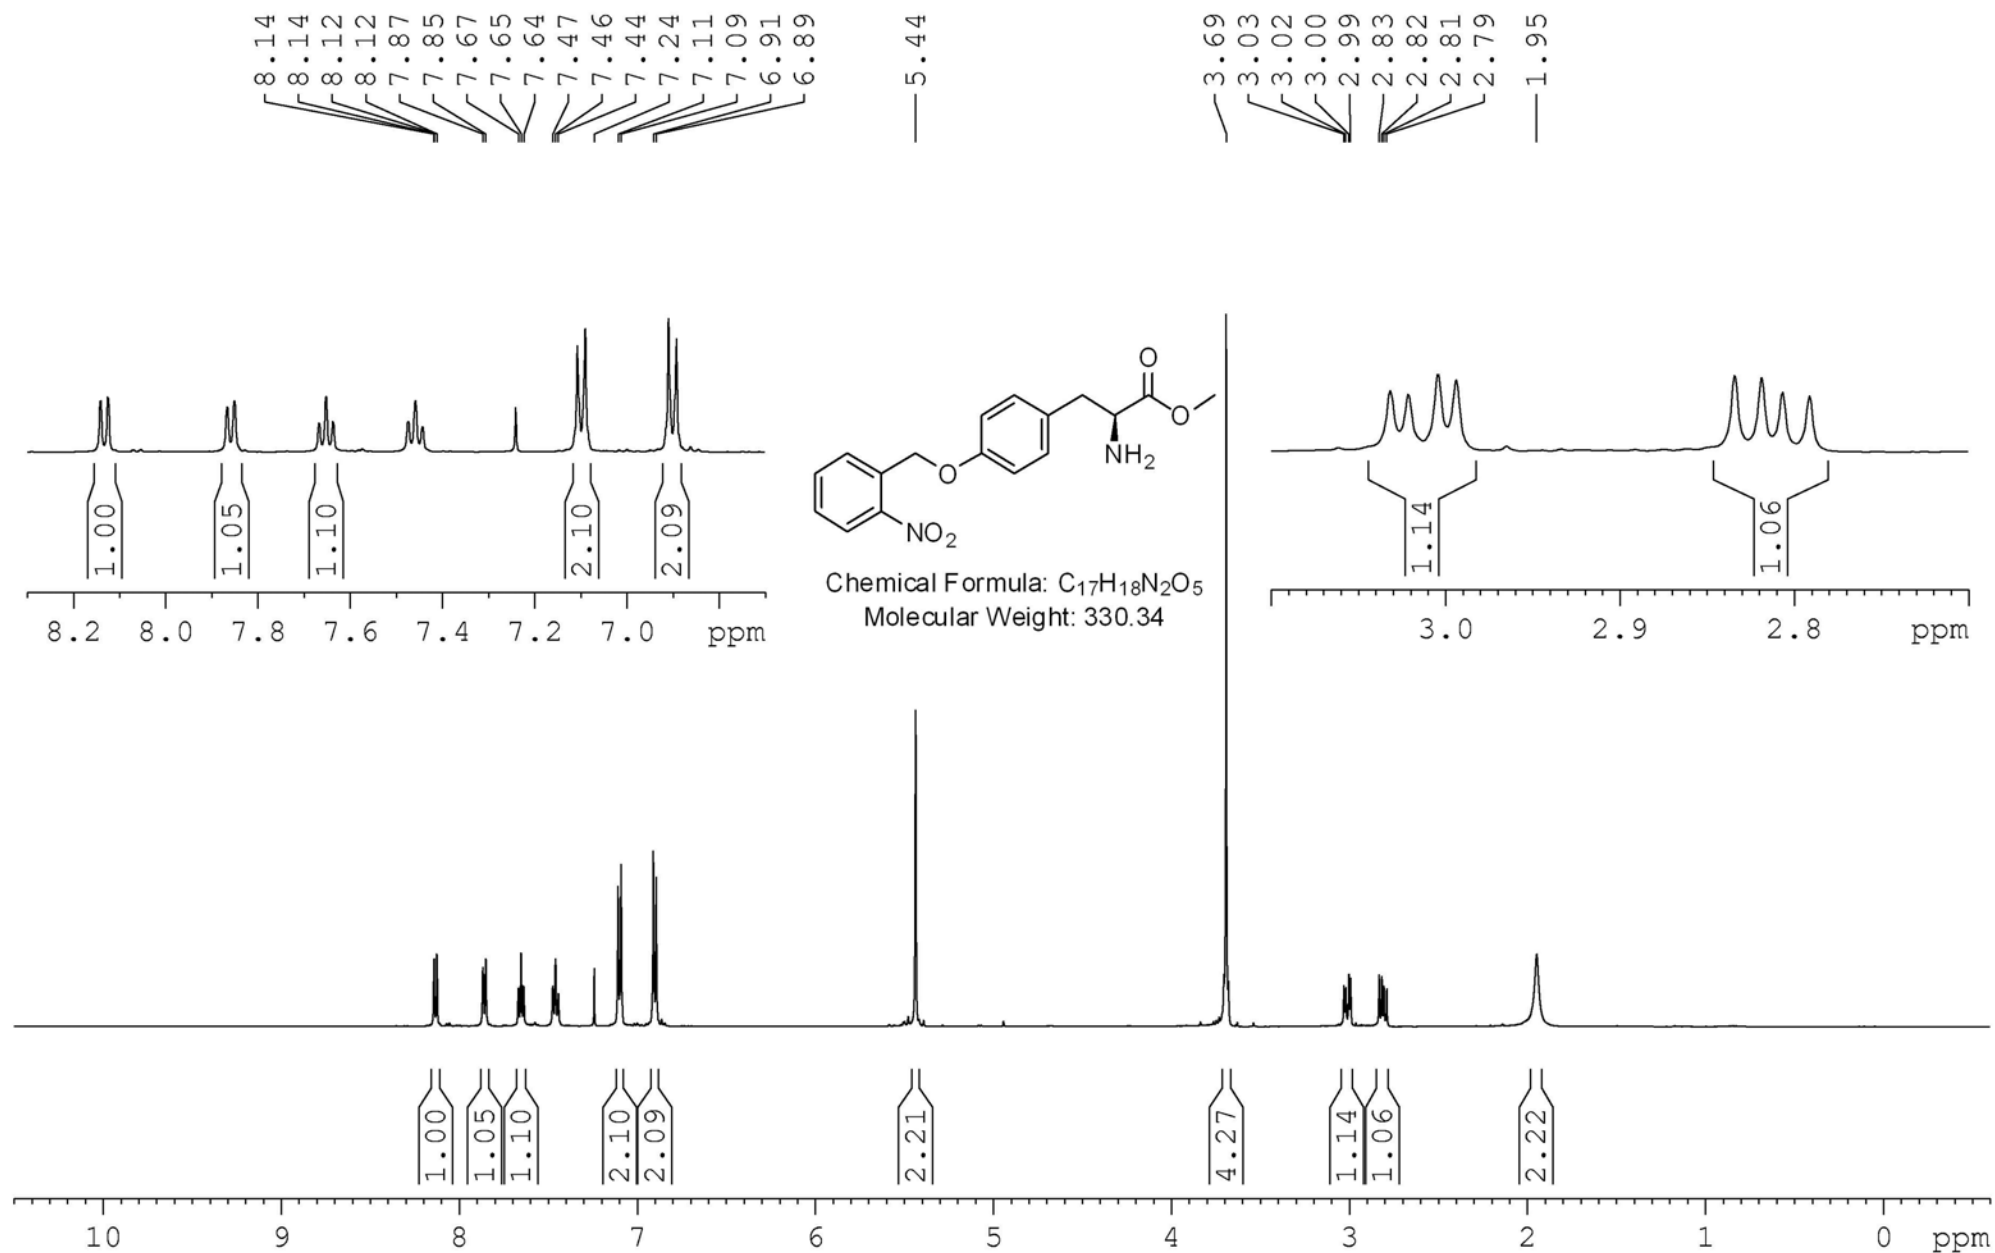

Solvent: CDCl<sub>3</sub> & NMR: 125 MHz

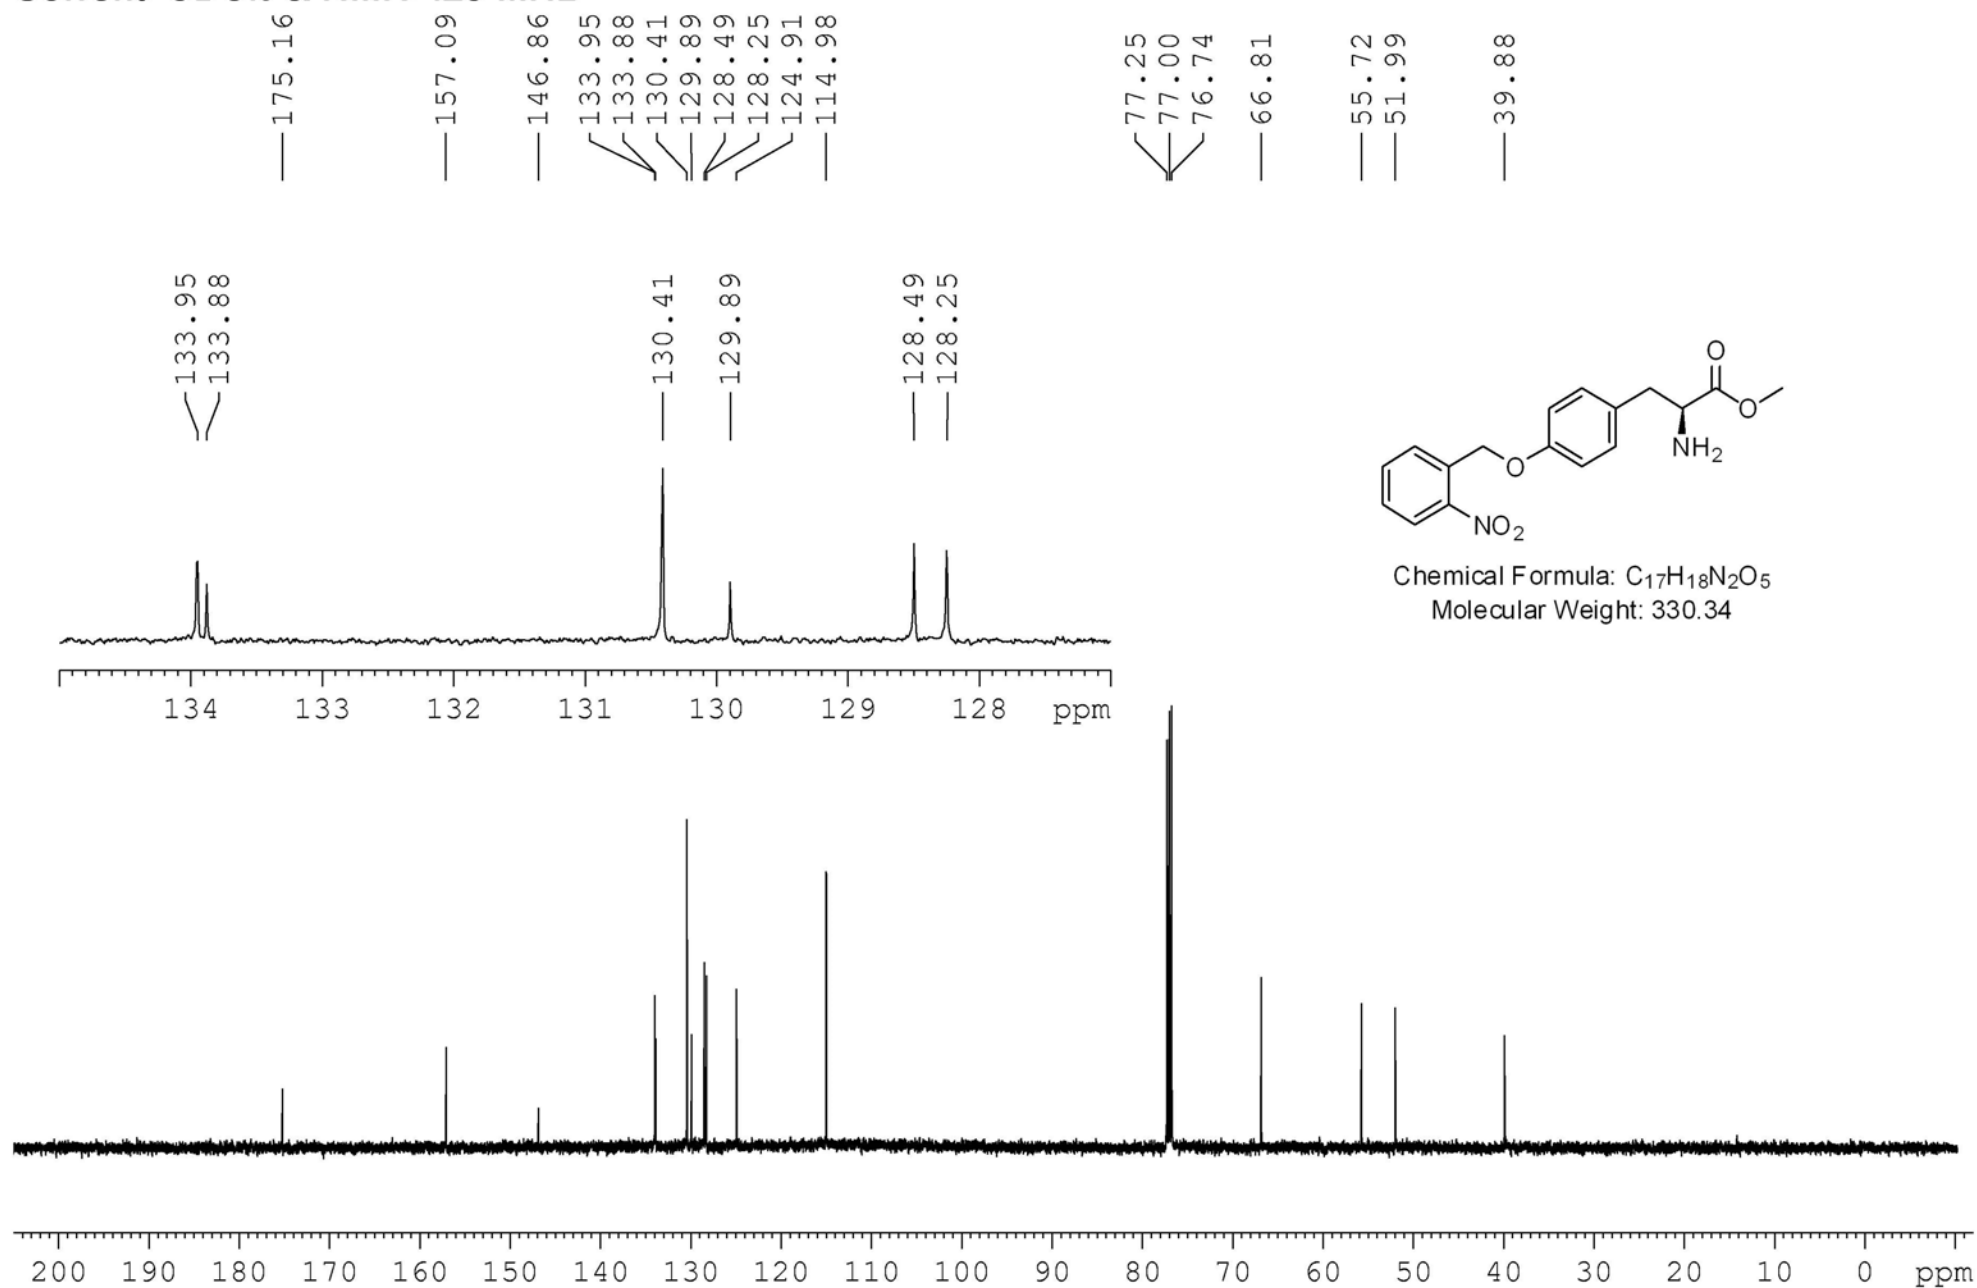

Solvent:  $\text{CDCl}_3$  & NMR: 500 MHz

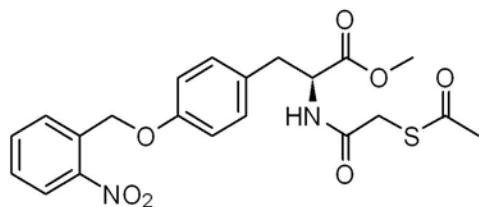

Chemical Formula:  $\text{C}_{21}\text{H}_{22}\text{N}_2\text{O}_7\text{S}$   
Molecular Weight: 446.47

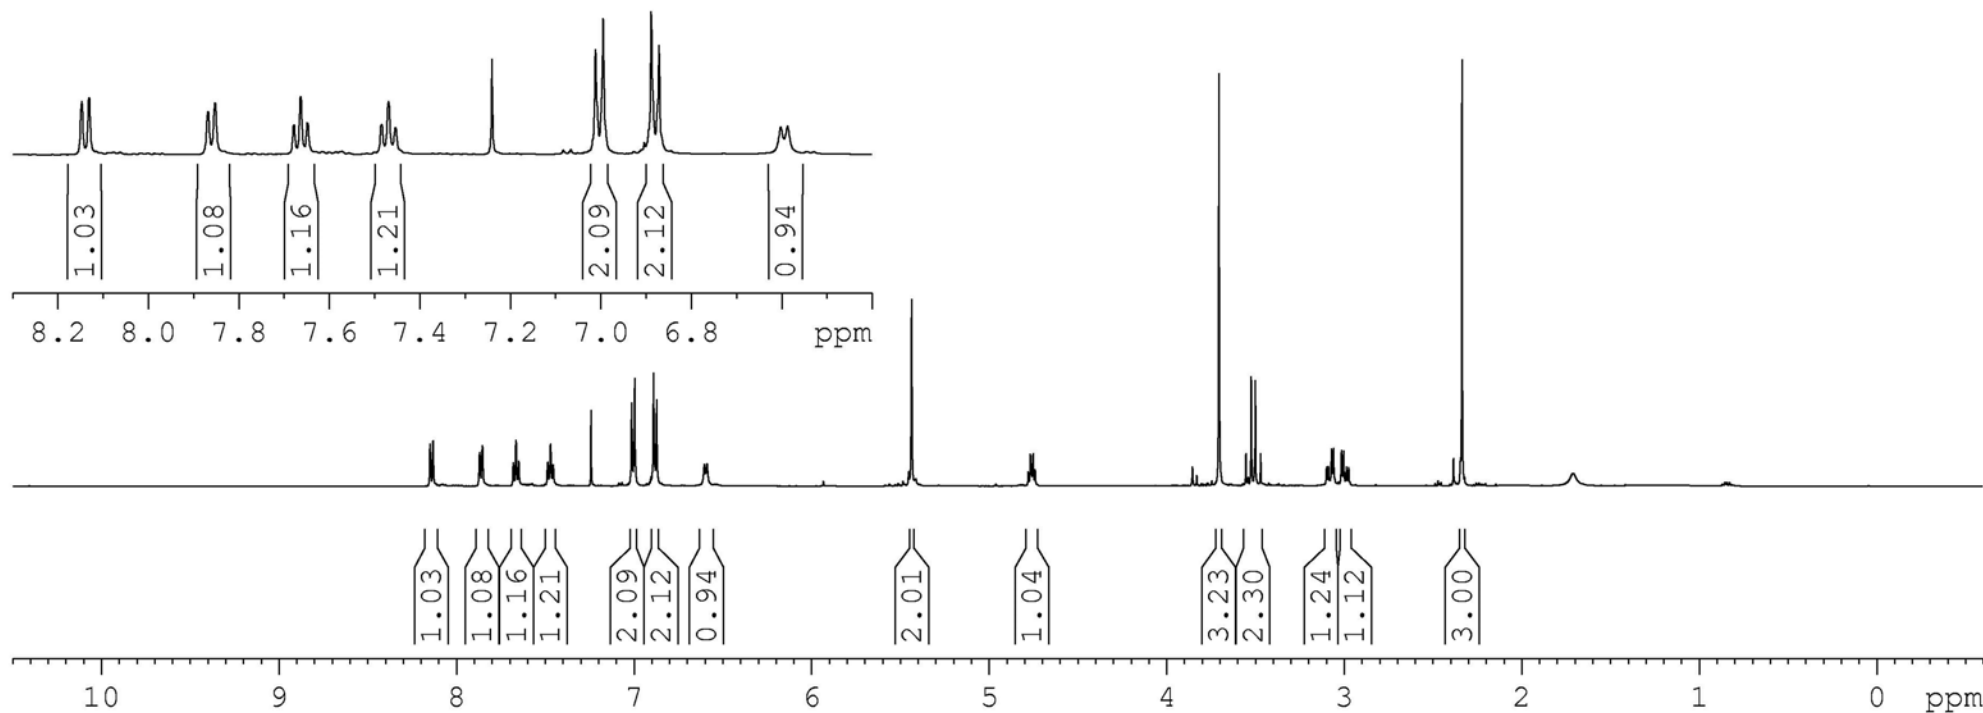

Solvent: CDCl<sub>3</sub> & NMR: 125 MHz

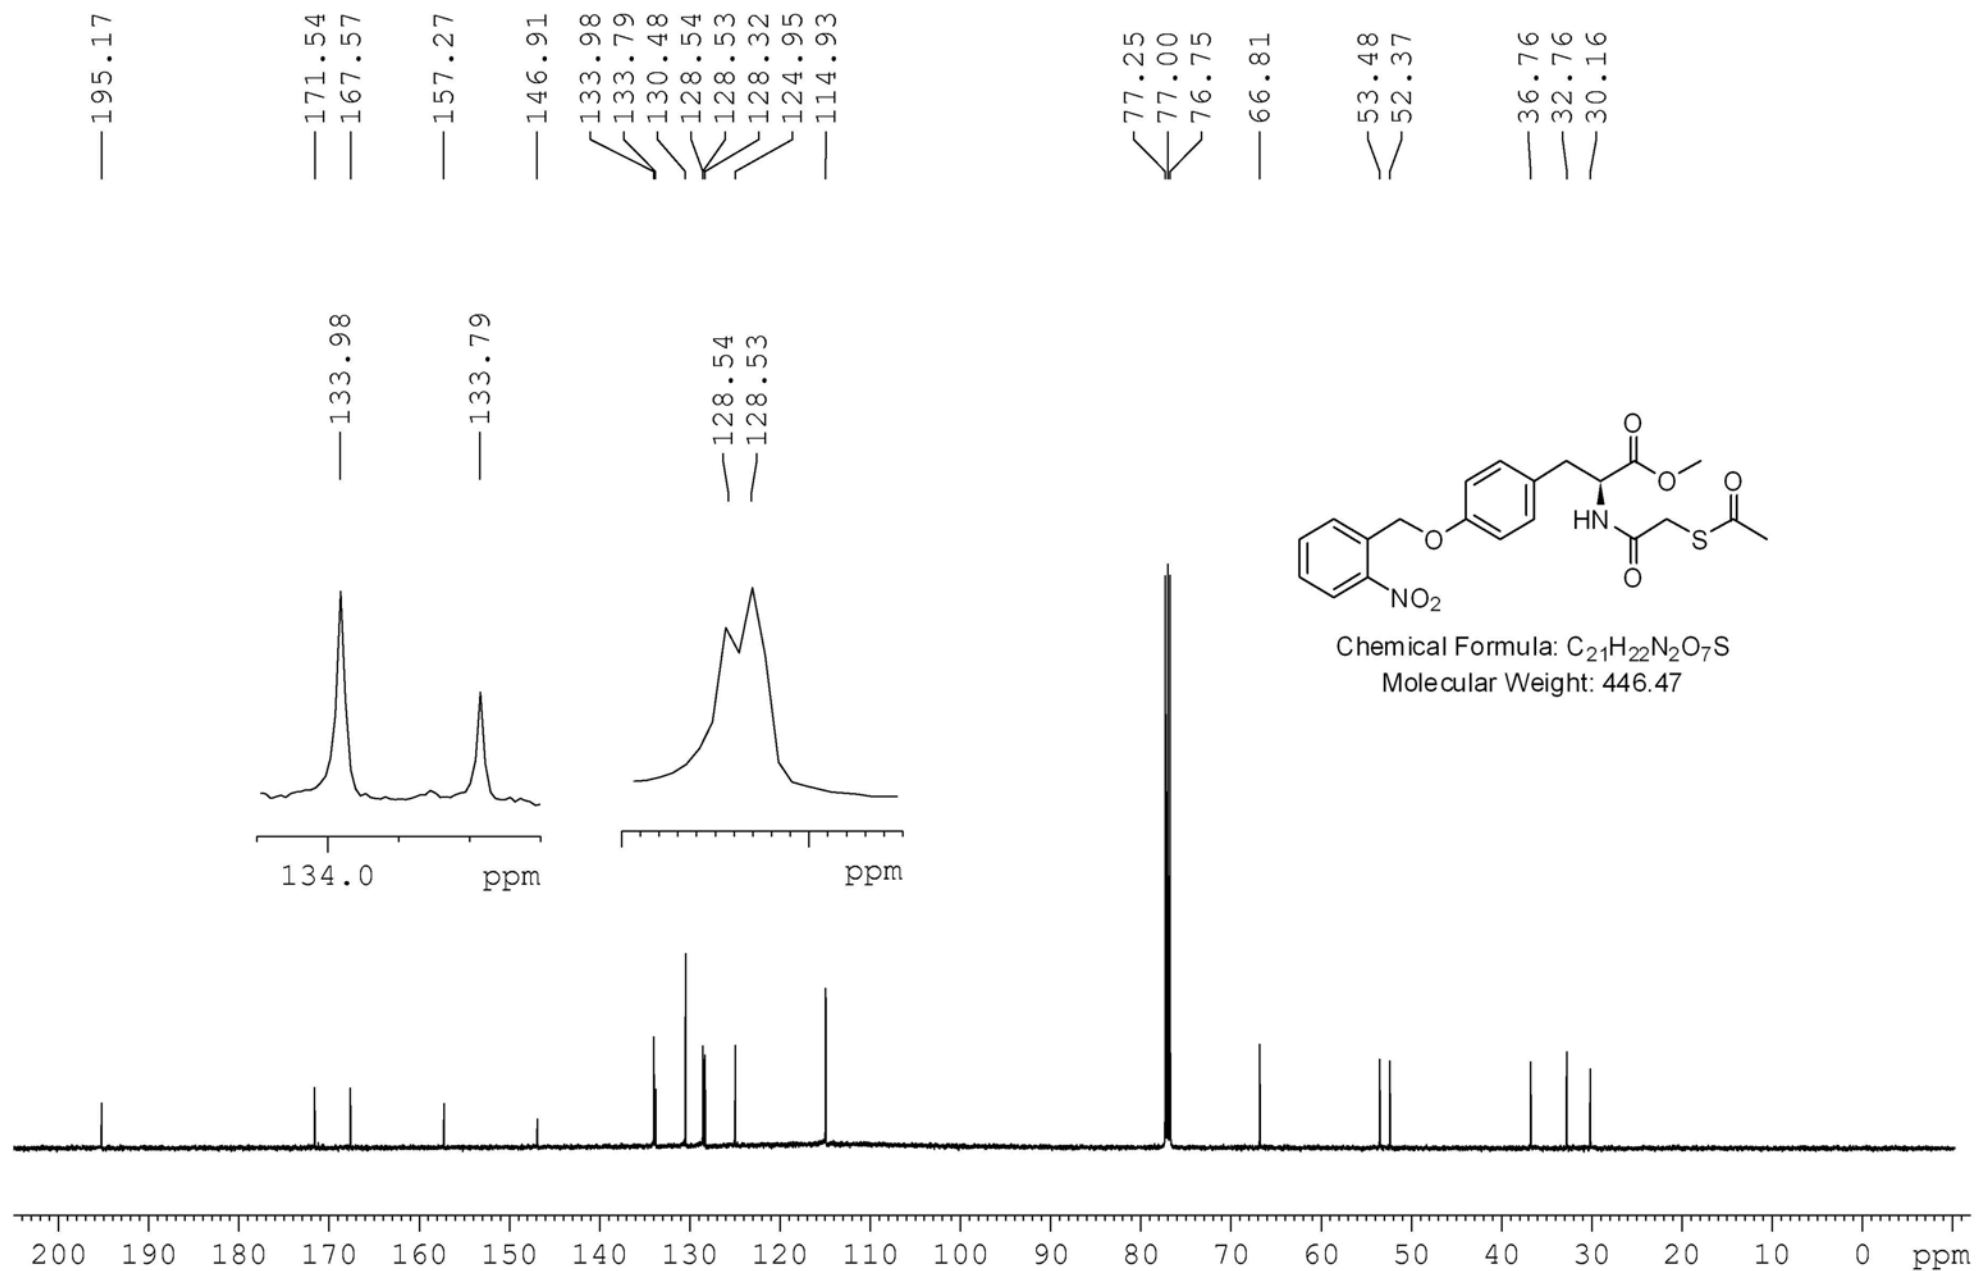

Solvent: CDCl<sub>3</sub> & NMR: 500 MHz

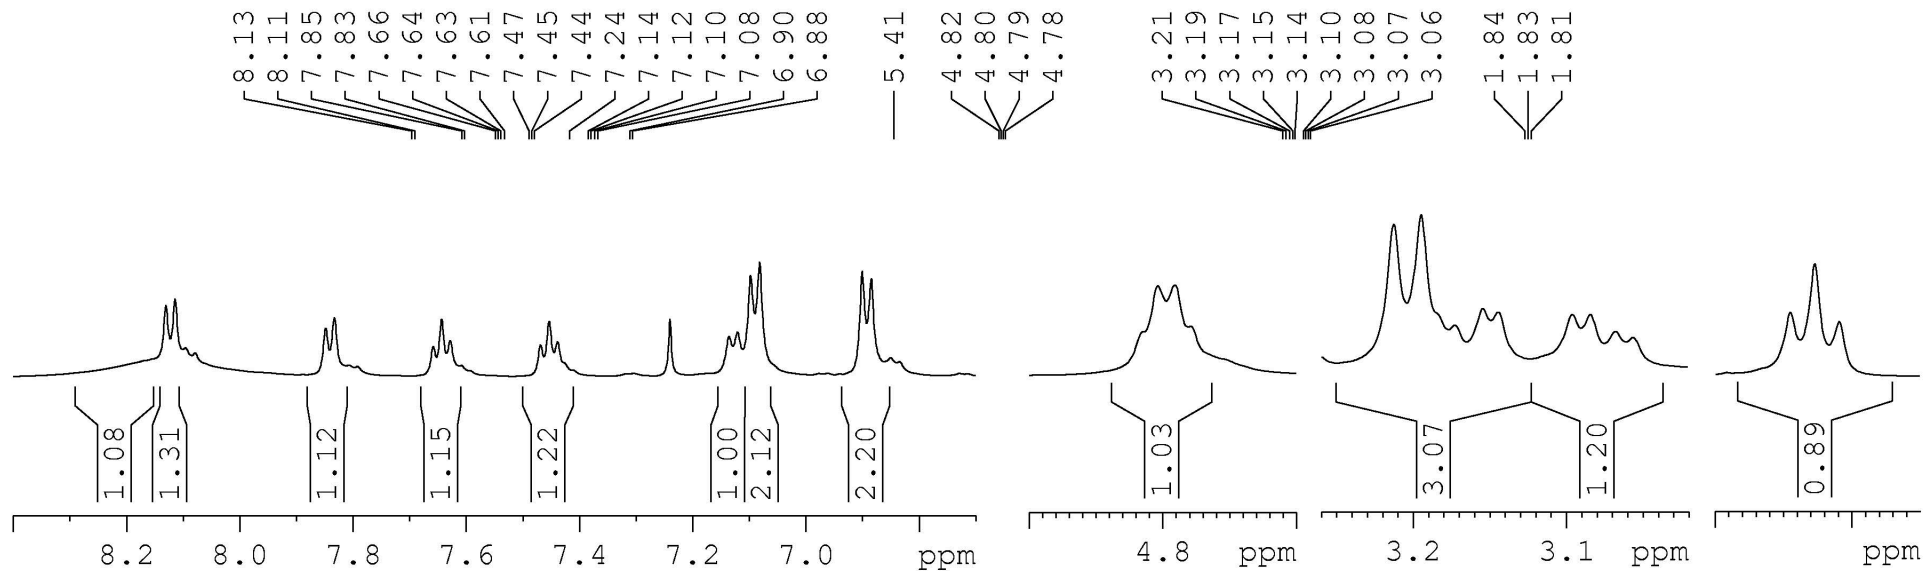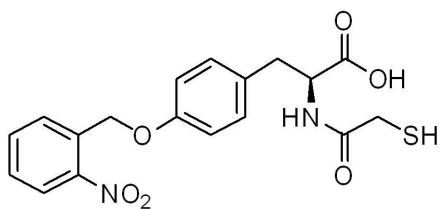

Chemical Formula: C<sub>18</sub>H<sub>18</sub>N<sub>2</sub>O<sub>6</sub>S  
Molecular Weight: 390.41

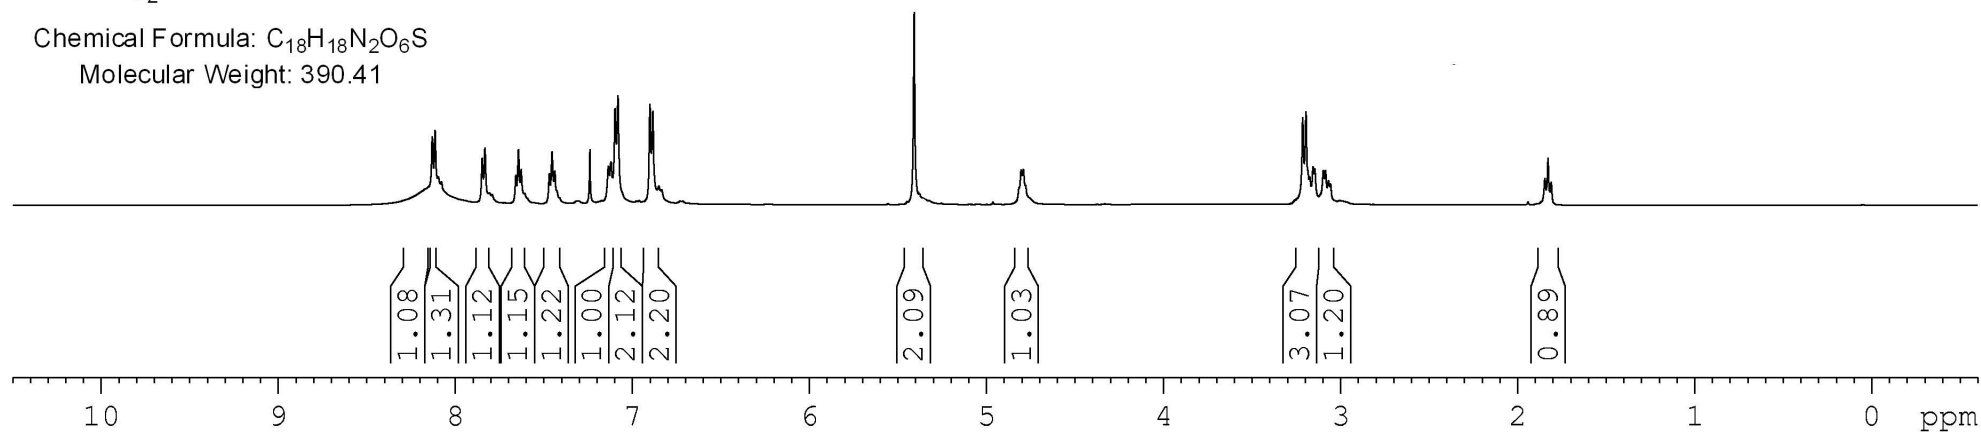

Solvent: CDCl<sub>3</sub> & NMR: 125 MHz

—177.03  
—170.04  
—157.38  
—146.86  
133.99  
133.72  
130.56  
128.51  
128.31  
128.29  
124.94  
—115.08

77.25  
77.00  
76.75  
—66.77  
—53.51  
—36.36  
—28.06

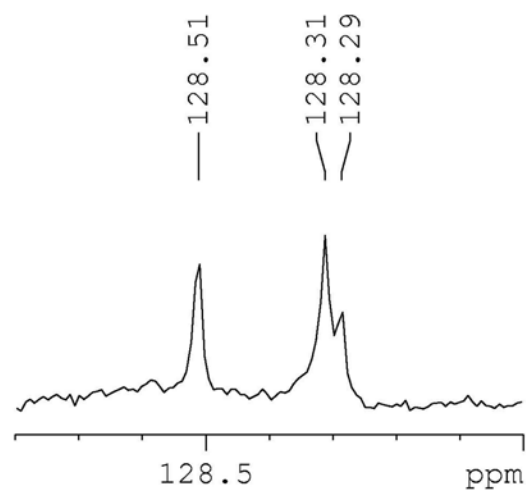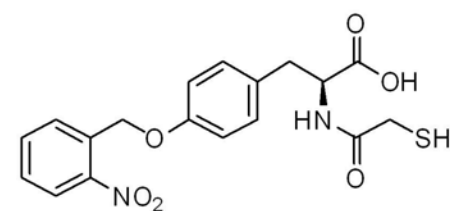

Chemical Formula: C<sub>18</sub>H<sub>18</sub>N<sub>2</sub>O<sub>6</sub>S  
Molecular Weight: 390.41

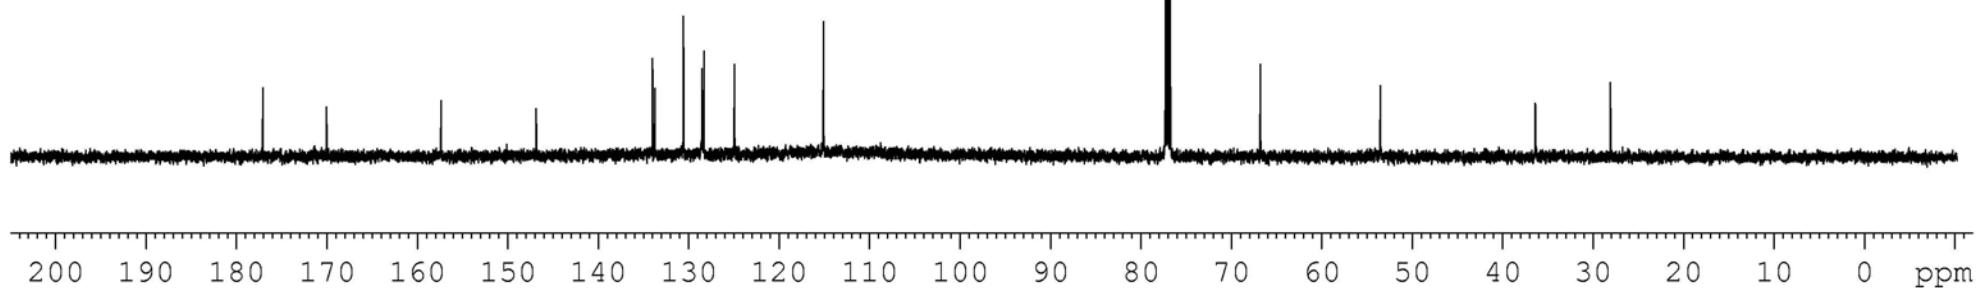

Solvent: CDCl<sub>3</sub> & NMR: 500 MHz

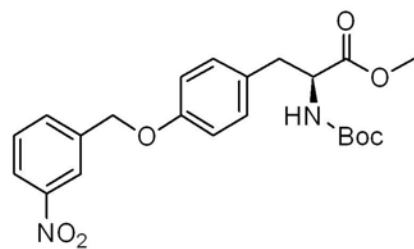

Chemical Formula: C<sub>22</sub>H<sub>26</sub>N<sub>2</sub>O<sub>7</sub>  
Molecular Weight: 430.45

8.27  
8.15  
8.13  
7.73  
7.72  
7.54  
7.53  
7.51  
7.24  
7.04  
7.02  
6.88  
6.86

5.09  
4.99  
4.98  
4.52  
4.50

3.67  
3.05  
3.04  
3.02  
3.01  
2.98  
2.97  
2.95  
2.94

1.38

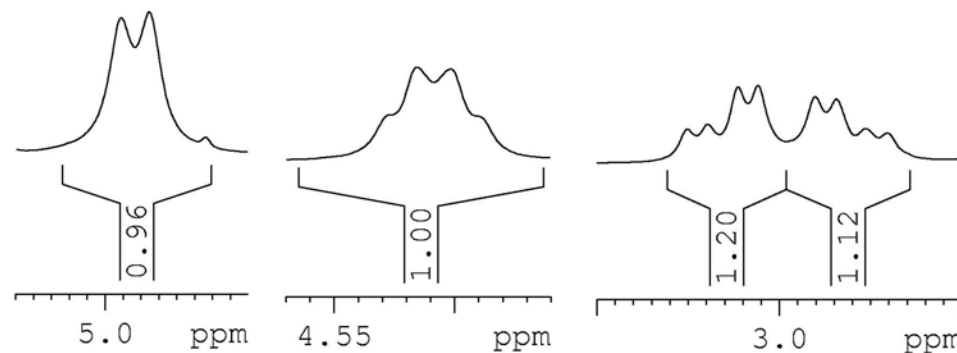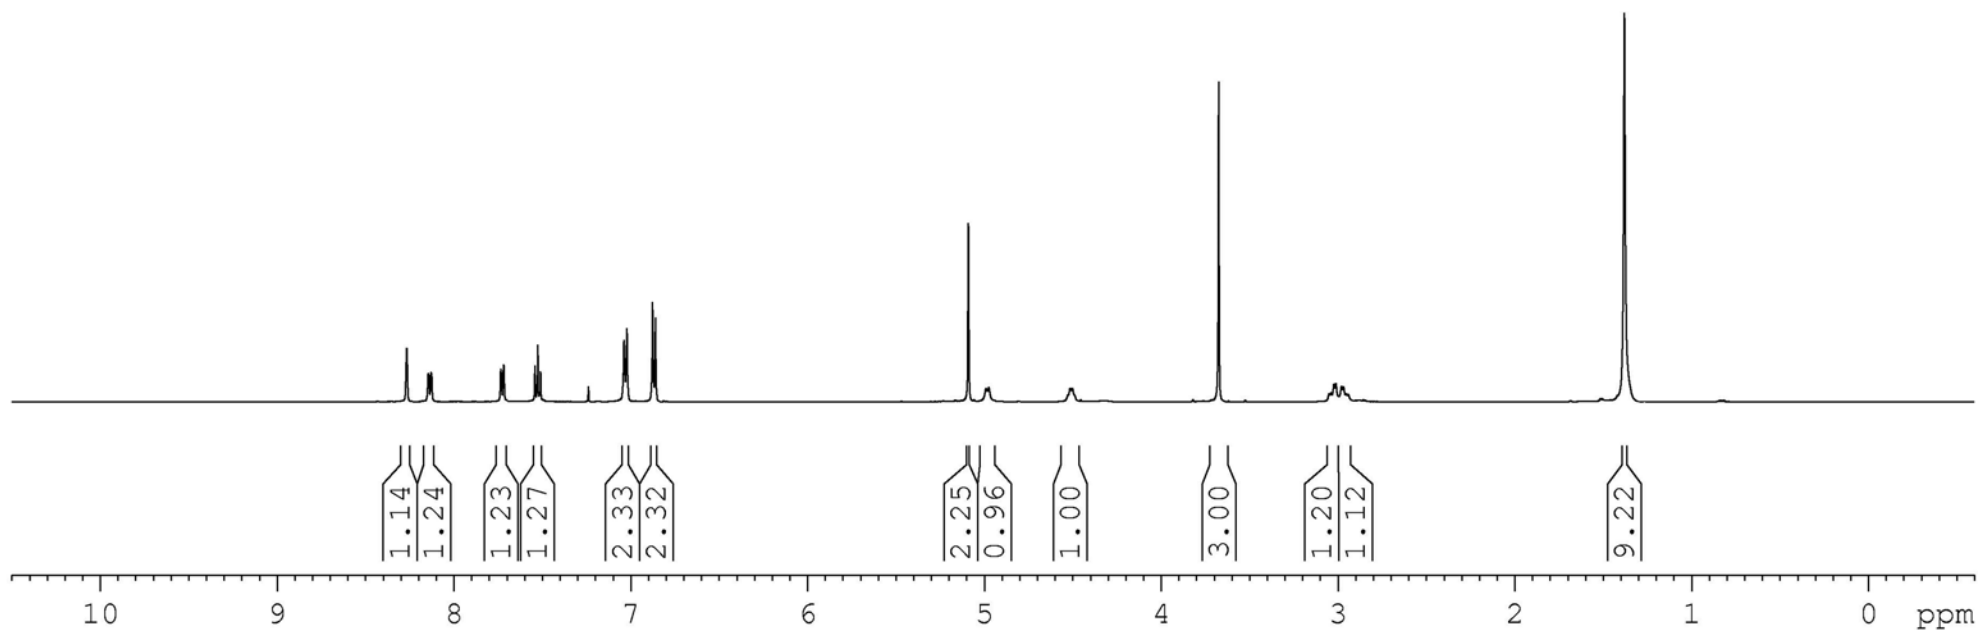

Solvent:  $\text{CDCl}_3$  & NMR: 125 MHz

— 172.26  
— 157.17  
— 155.00  
— 148.33  
— 139.16  
— 133.04  
— 130.39  
— 129.49  
— 128.90  
— 122.79  
— 122.01  
— 114.79  
  
79.81  
77.26  
77.00  
76.75  
68.54  
  
54.44  
52.11  
  
— 37.39  
— 28.19

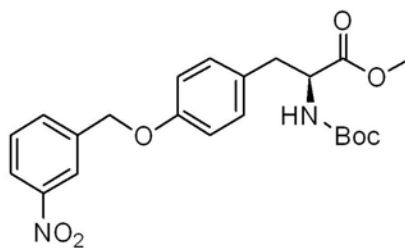

Chemical Formula:  $\text{C}_{22}\text{H}_{26}\text{N}_2\text{O}_7$   
Molecular Weight: 430.45

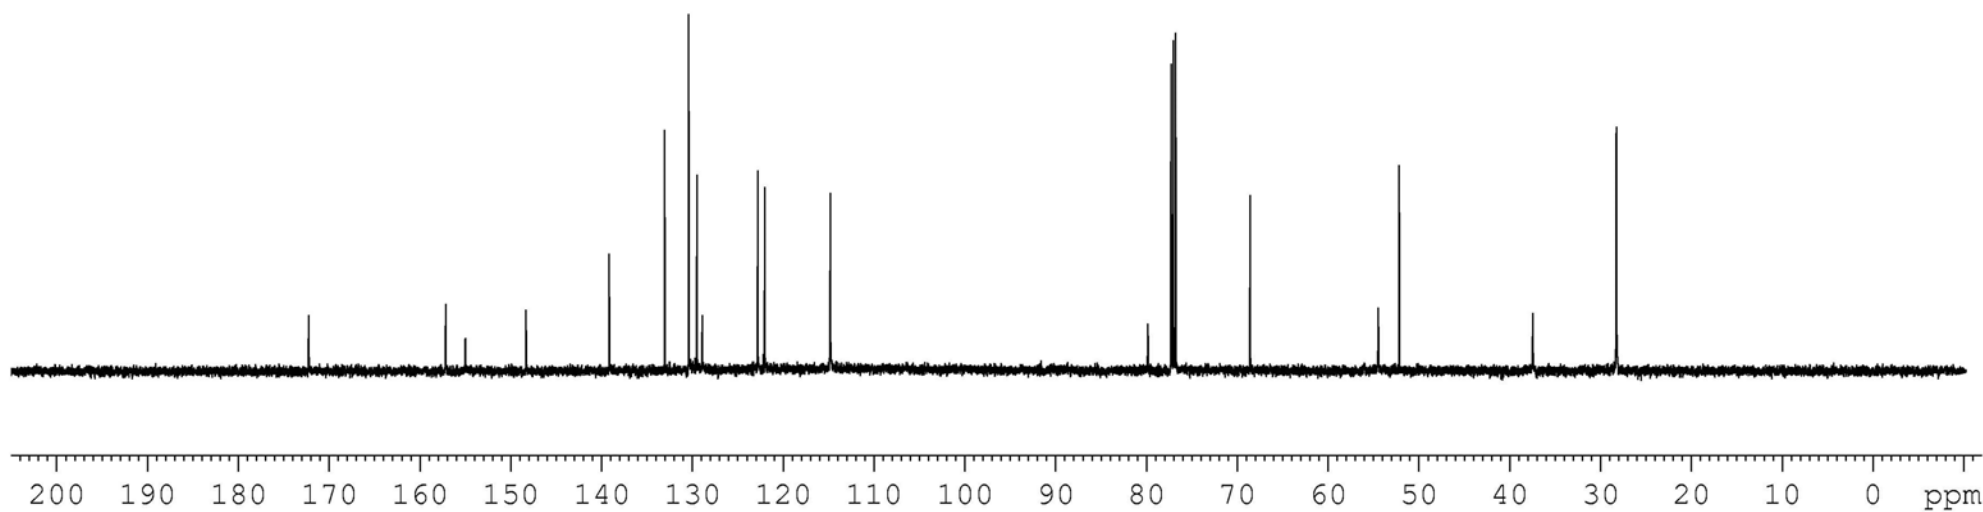

Solvent: CDCl<sub>3</sub> & NMR: 400 MHz

8.26  
8.14  
8.13  
8.12  
8.11  
7.73  
7.71  
7.54  
7.52  
7.50  
7.10  
7.08  
6.89  
6.86

— 5.08

3.74  
3.72  
3.72  
3.70  
3.67  
3.04  
3.03  
3.00  
2.99  
2.86  
2.84  
2.83  
2.81

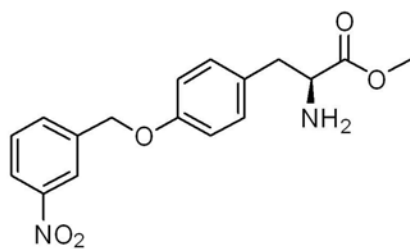

Chemical Formula: C<sub>17</sub>H<sub>18</sub>N<sub>2</sub>O<sub>5</sub>  
Molecular Weight: 330.34

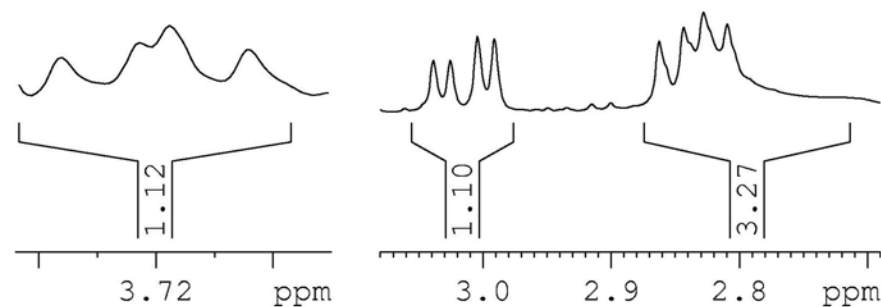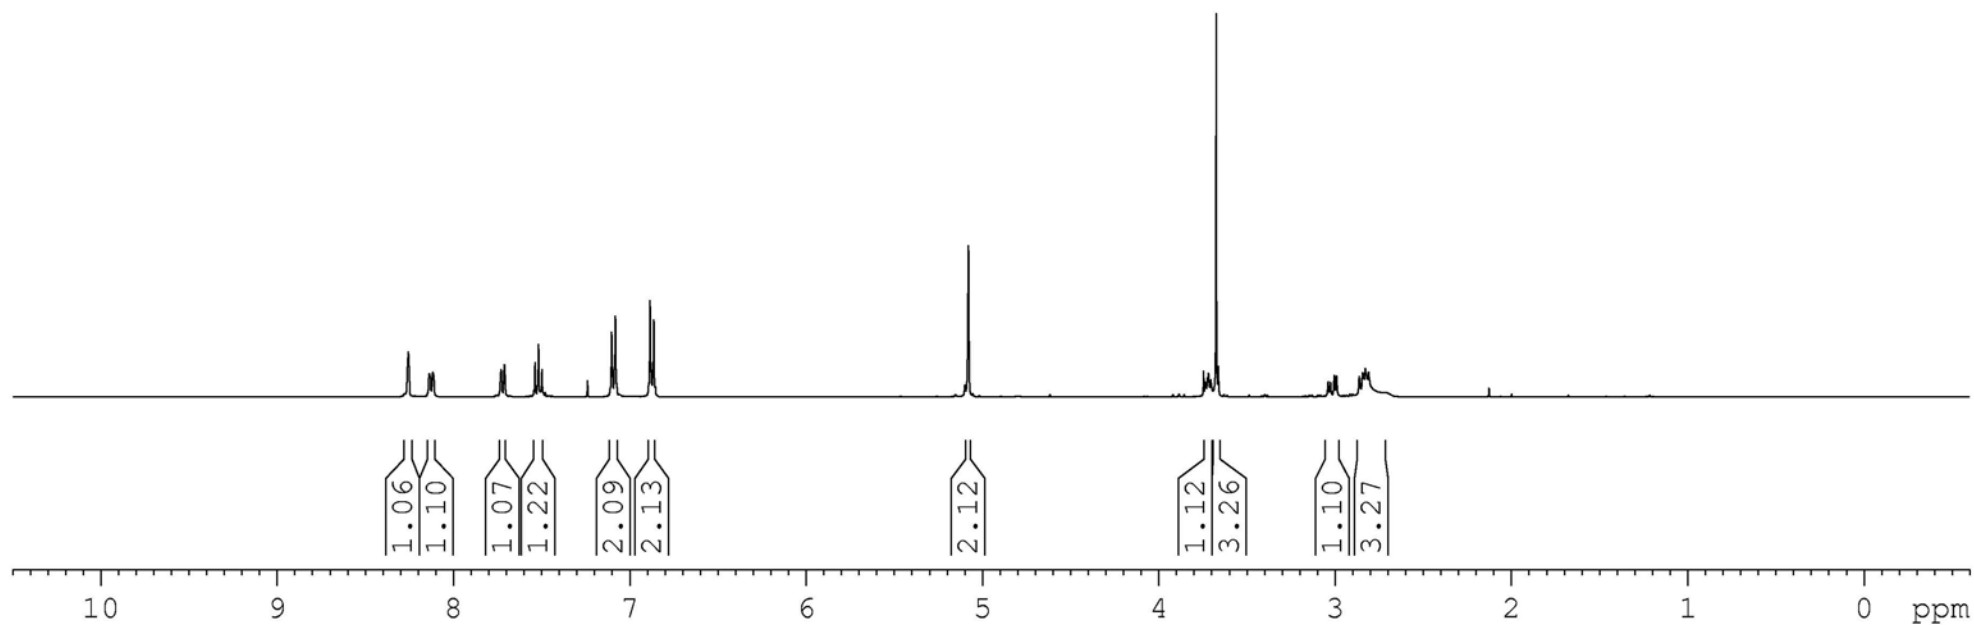

Solvent: CDCl<sub>3</sub> & NMR: 100 MHz

— 174.50  
— 157.09  
— 148.27  
— 139.12  
— 133.03  
— 130.38  
— 129.46  
— 122.76  
— 121.97  
— 121.24  
— 114.84  
  
77.32  
77.00  
76.68  
— 68.50  
  
— 55.44  
— 52.01  
  
— 39.33

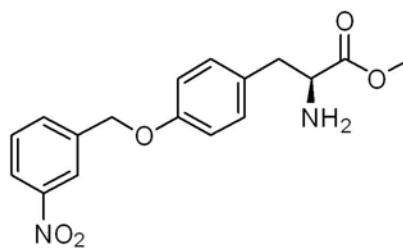

Chemical Formula: C<sub>17</sub>H<sub>18</sub>N<sub>2</sub>O<sub>5</sub>

Molecular Weight: 330.34

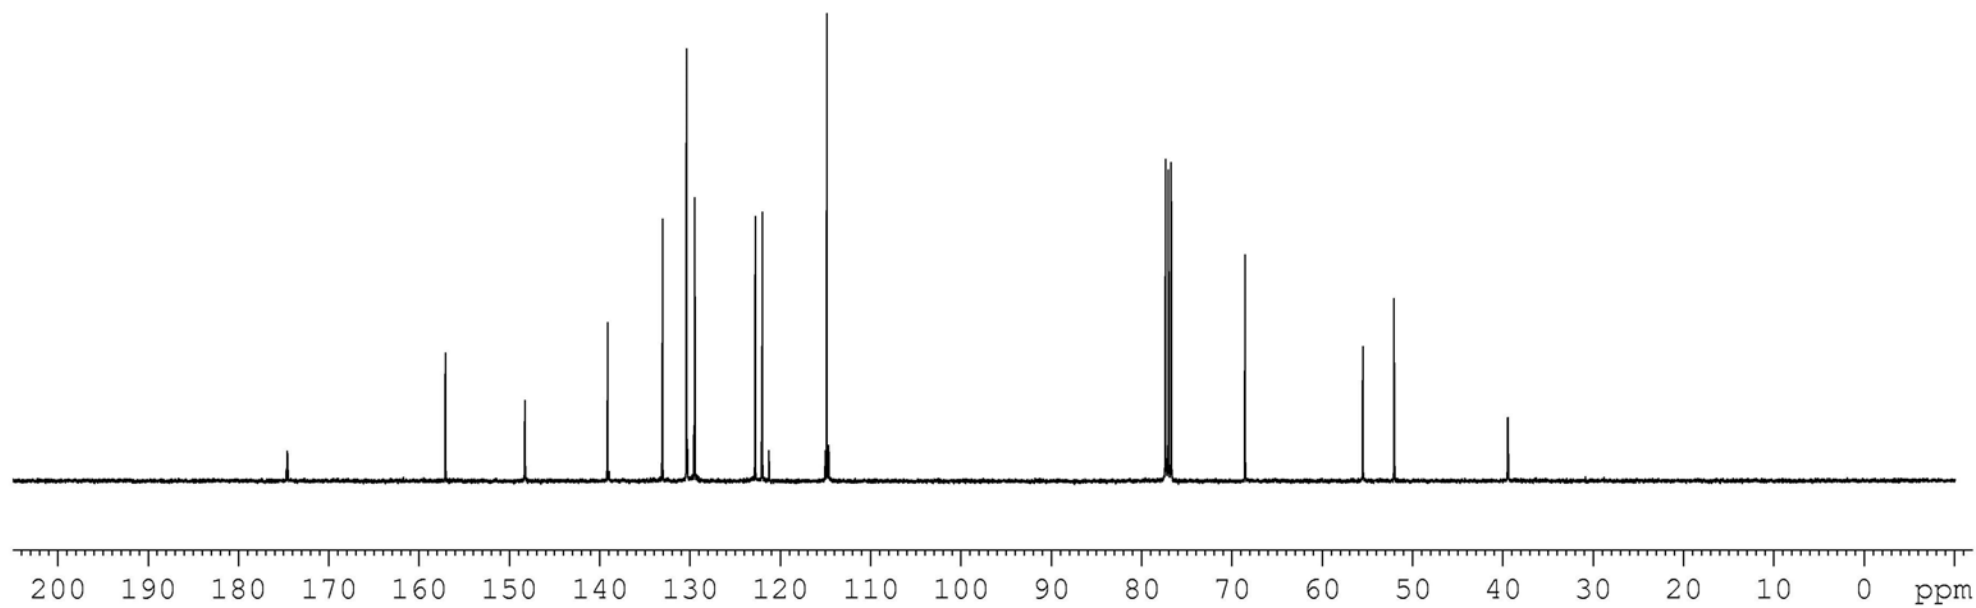

Solvent: CDCl<sub>3</sub> & NMR: 400 MHz

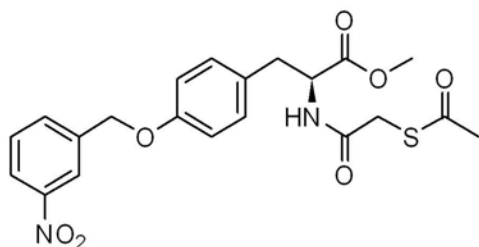

Chemical Formula: C<sub>21</sub>H<sub>22</sub>N<sub>2</sub>O<sub>7</sub>S  
Molecular Weight: 446.47

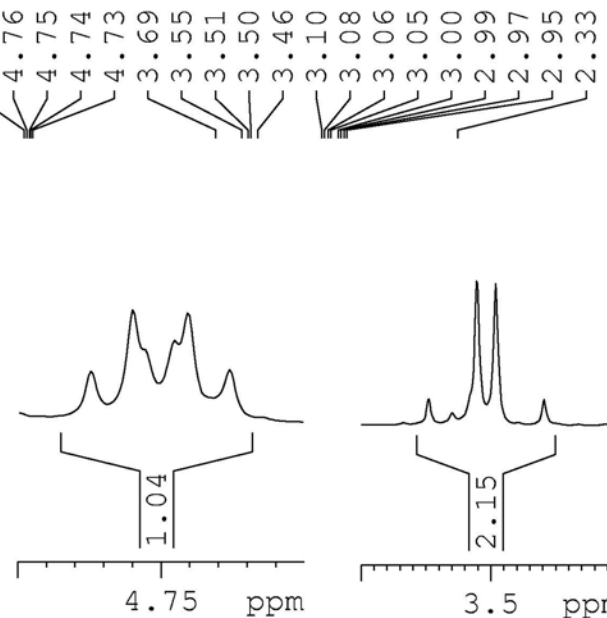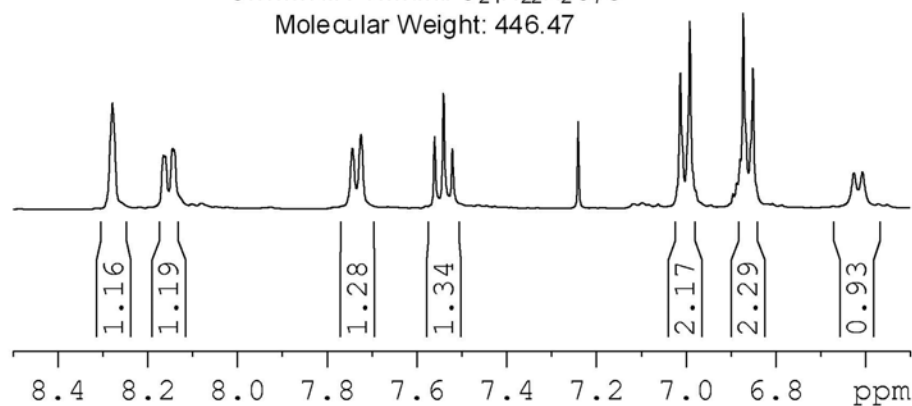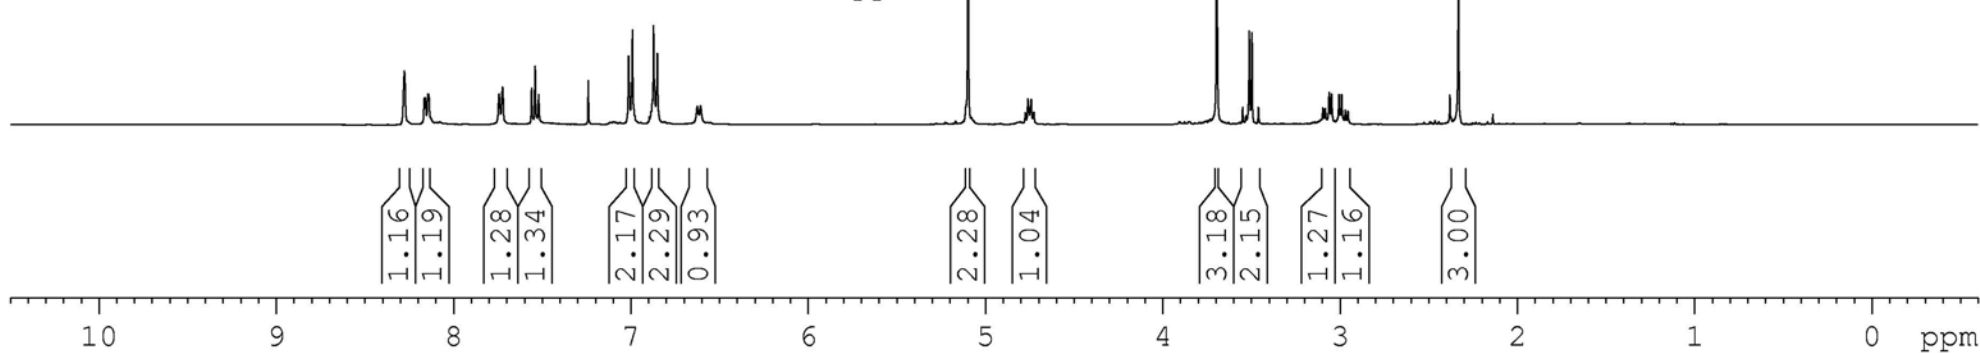

Solvent: CDCl<sub>3</sub> & NMR: 100 MHz

— 195.17  
— 171.51  
— 167.56  
— 157.25  
— 148.38  
— 139.12  
— 133.08  
— 130.45  
— 129.54  
— 128.55  
— 122.87  
— 122.08  
— 114.79

77.32  
77.00  
76.68  
— 68.57

53.48  
52.35

36.76  
32.73  
30.13

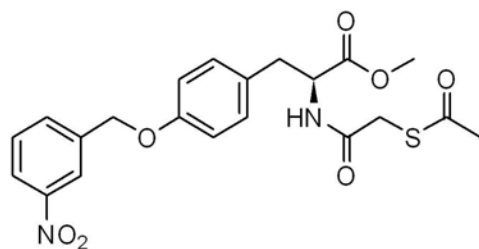

Chemical Formula: C<sub>21</sub>H<sub>22</sub>N<sub>2</sub>O<sub>7</sub>S  
Molecular Weight: 446.47

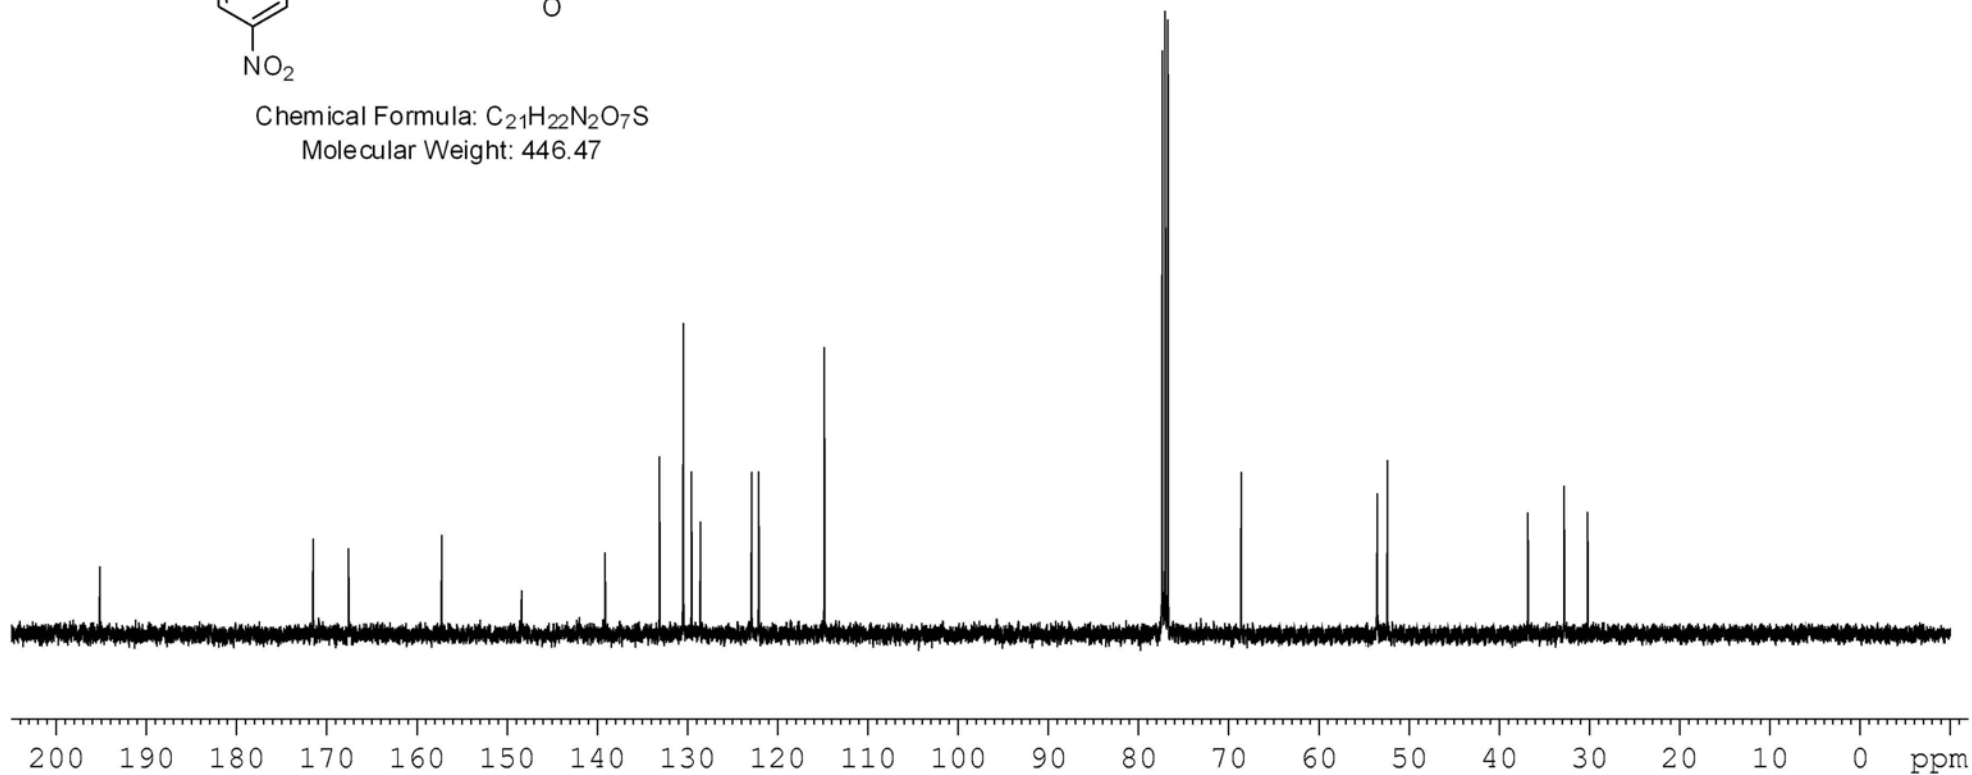

Solvent: CDCl<sub>3</sub> & NMR: 400 MHz

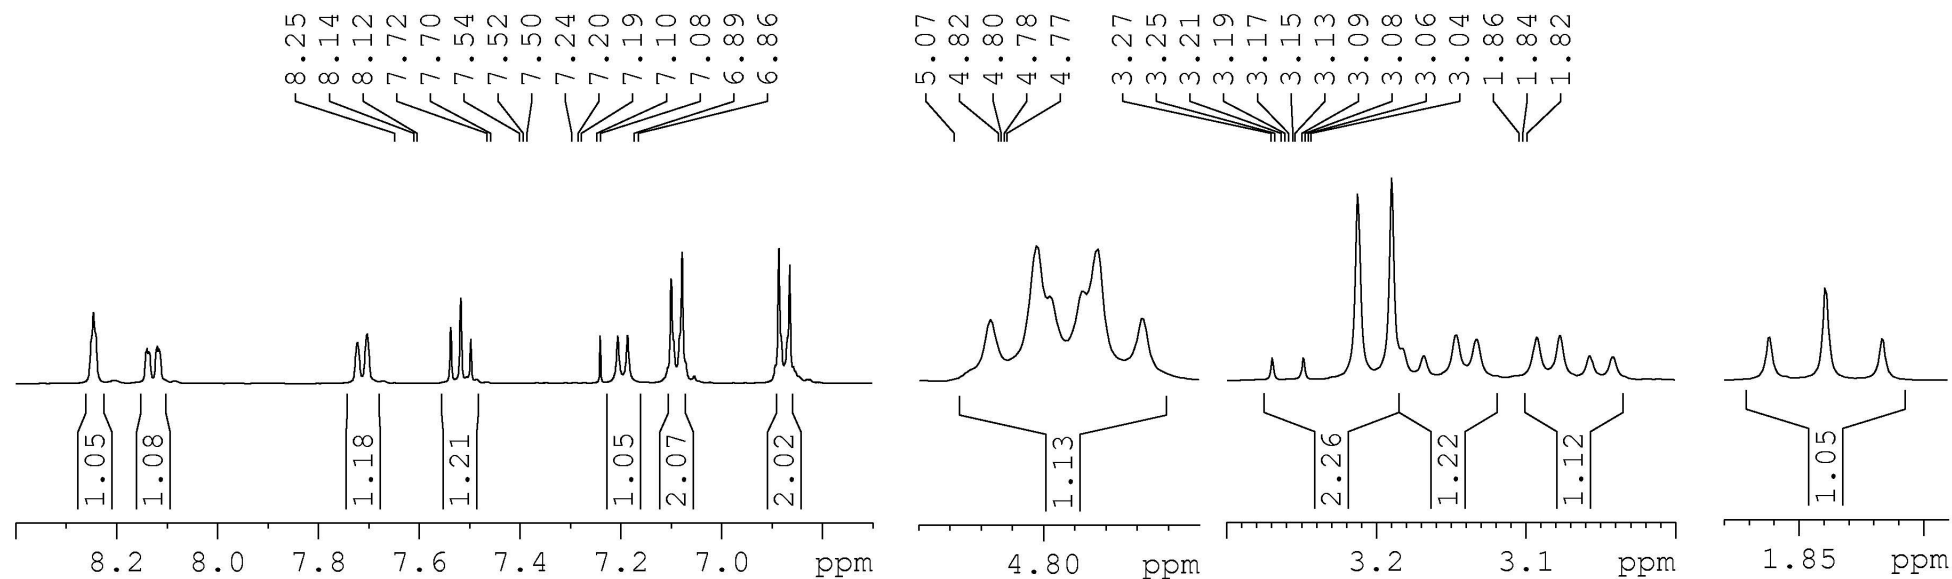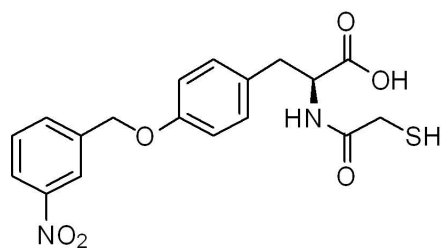

Chemical Formula: C<sub>18</sub>H<sub>18</sub>N<sub>2</sub>O<sub>6</sub>S

Molecular Weight: 390.41

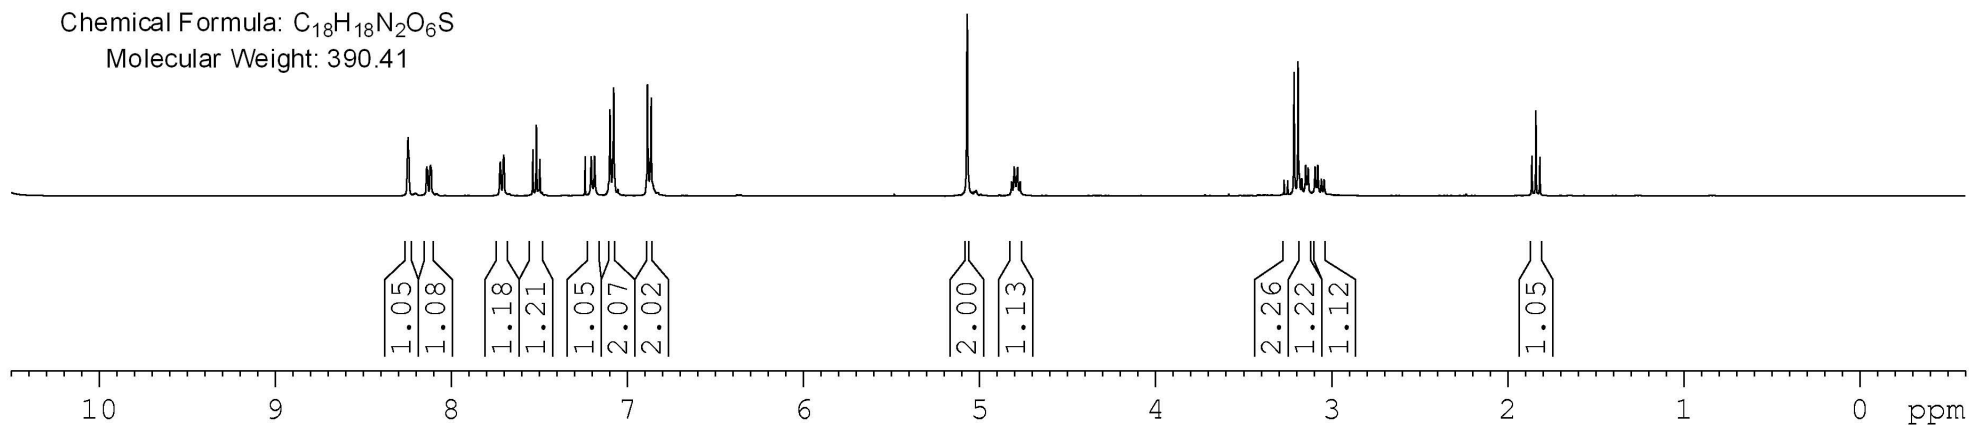

Solvent: CDCl<sub>3</sub> & NMR: 100 MHz

— 174.75  
— 170.28  
— 157.36  
— 148.30  
— 139.02  
— 133.10  
— 130.53  
— 129.52  
— 128.23  
— 122.85  
— 122.06  
— 114.94

— 68.51

— 53.51

— 36.33

— 27.95

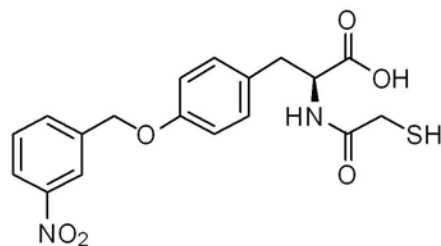

Chemical Formula: C<sub>18</sub>H<sub>18</sub>N<sub>2</sub>O<sub>6</sub>S

Molecular Weight: 390.41

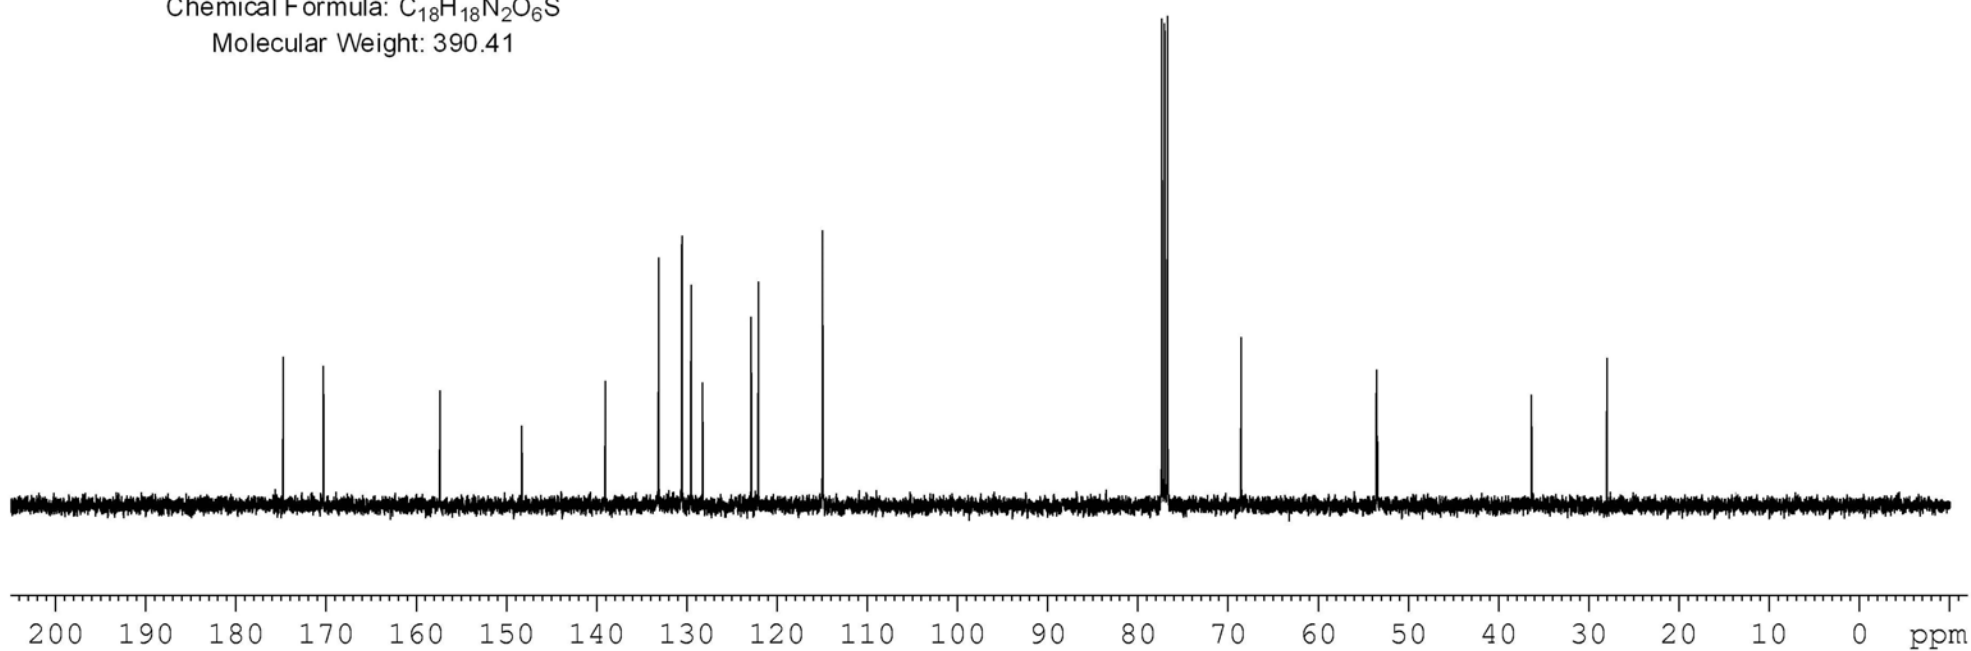

Solvent: CDCl<sub>3</sub> & NMR: 500 MHz

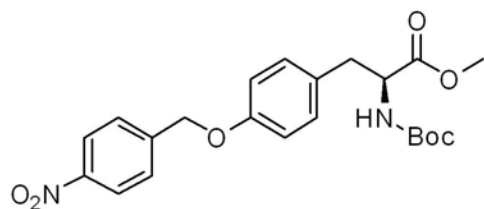

Chemical Formula: C<sub>22</sub>H<sub>26</sub>N<sub>2</sub>O<sub>7</sub>  
Molecular Weight: 430.45

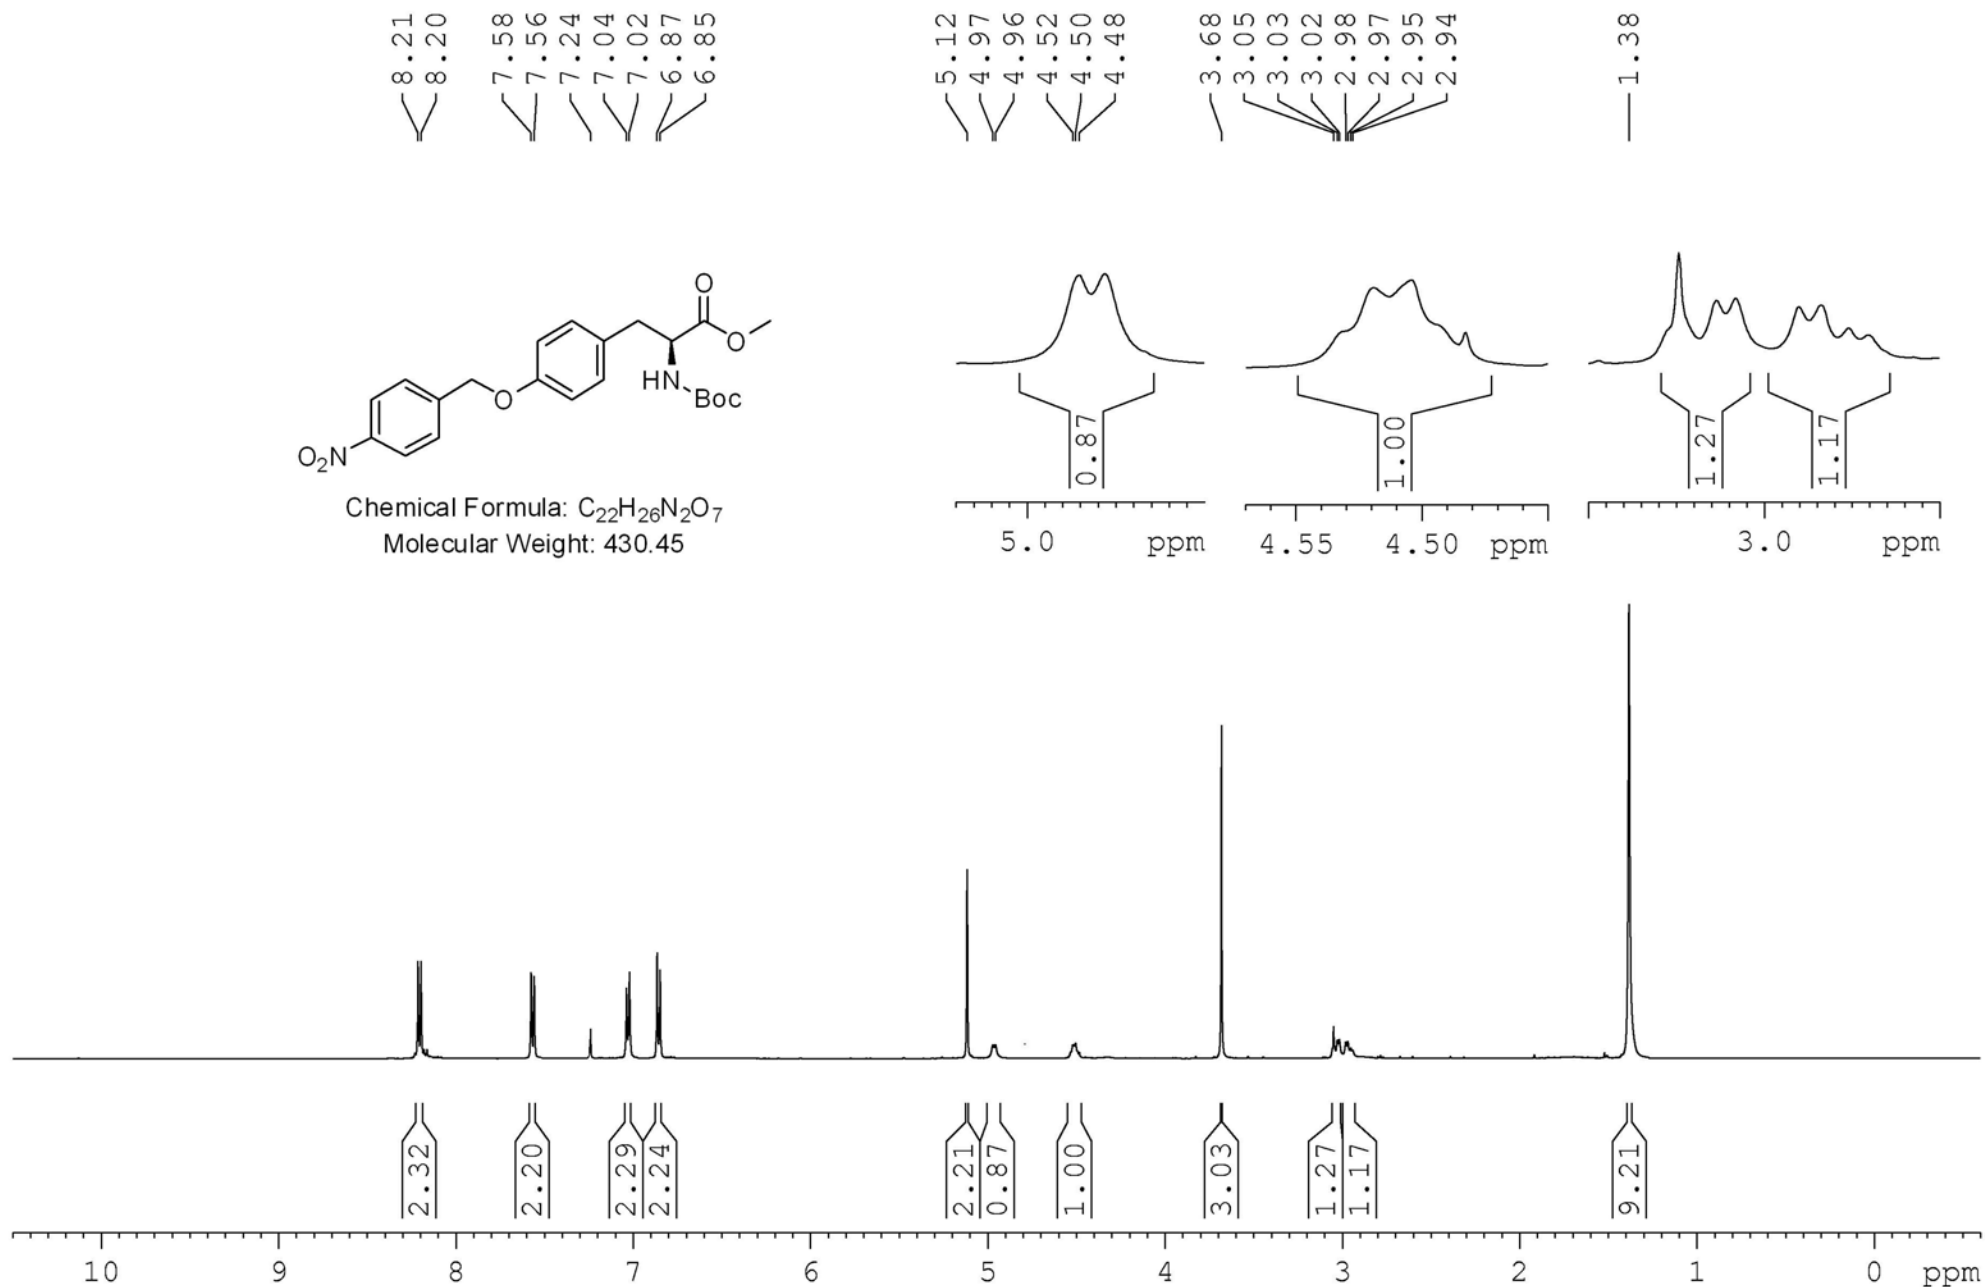

Solvent: CDCl<sub>3</sub> & NMR: 125 MHz

— 172.30  
— 157.17  
— 155.02  
— 147.49  
— 144.48  
— 130.43  
— 128.97  
— 127.52  
— 123.75  
— 114.81  
— 79.87  
— 77.25  
— 77.00  
— 76.74  
— 68.60  
— 54.45  
— 52.16  
— 37.43  
— 28.22

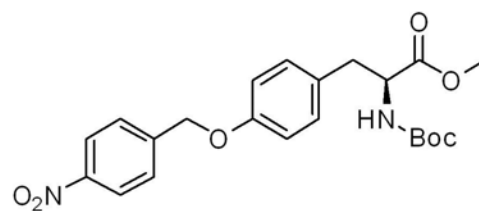

Chemical Formula: C<sub>22</sub>H<sub>26</sub>N<sub>2</sub>O<sub>7</sub>  
Molecular Weight: 430.45

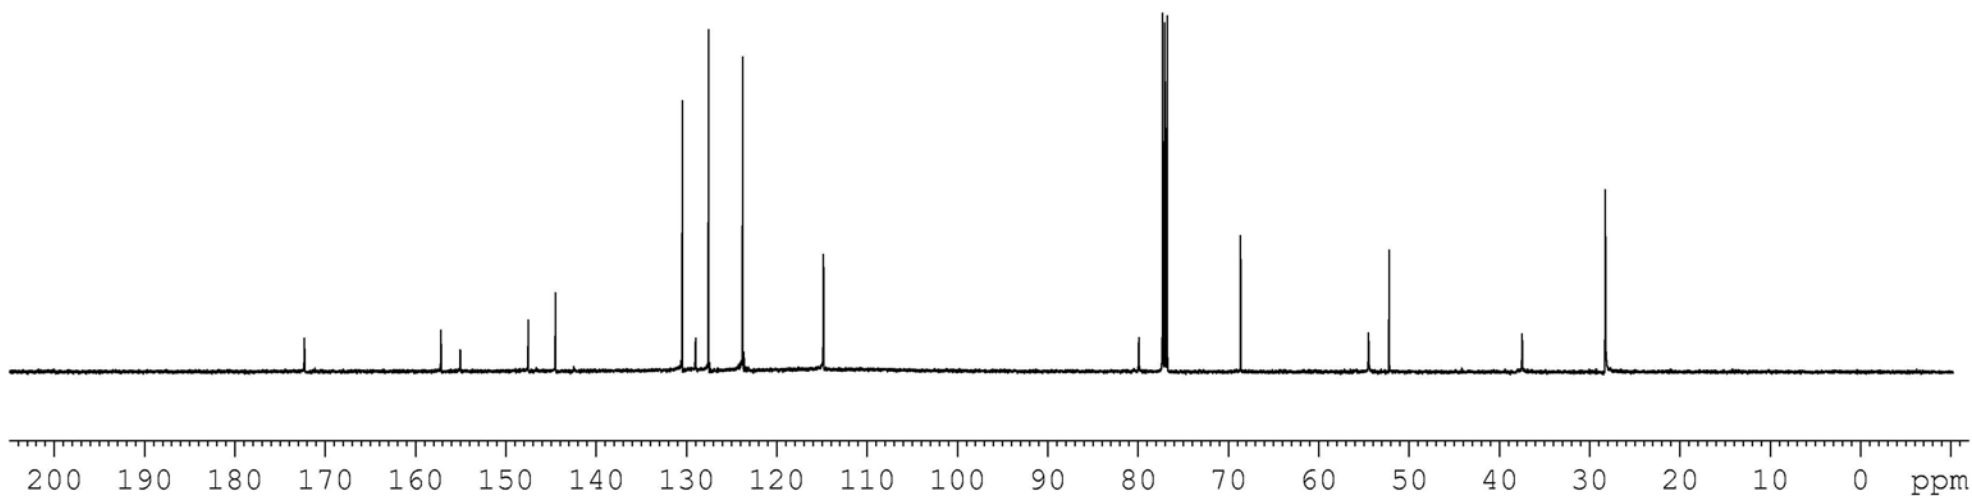

Solvent: CDCl<sub>3</sub> & NMR: 400 MHz

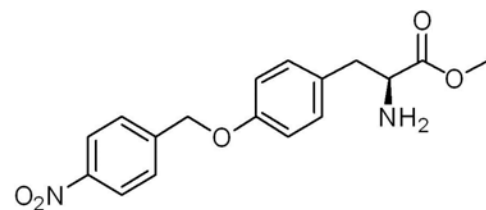

Chemical Formula: C<sub>17</sub>H<sub>18</sub>N<sub>2</sub>O<sub>5</sub>  
Molecular Weight: 330.34

8.17  
8.15  
7.54  
7.52  
7.24  
7.09  
7.07  
6.89  
6.86

5.05  
4.30  
4.28  
4.27  
3.77  
3.29  
3.27  
3.25  
3.24  
3.14  
3.13  
3.11  
3.09

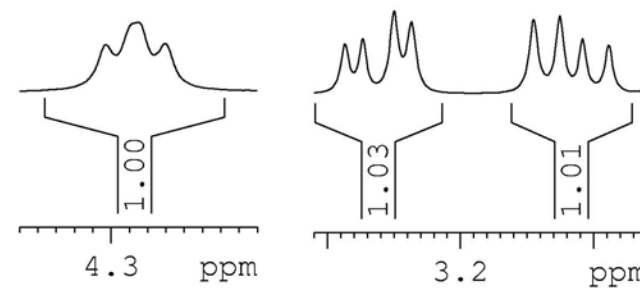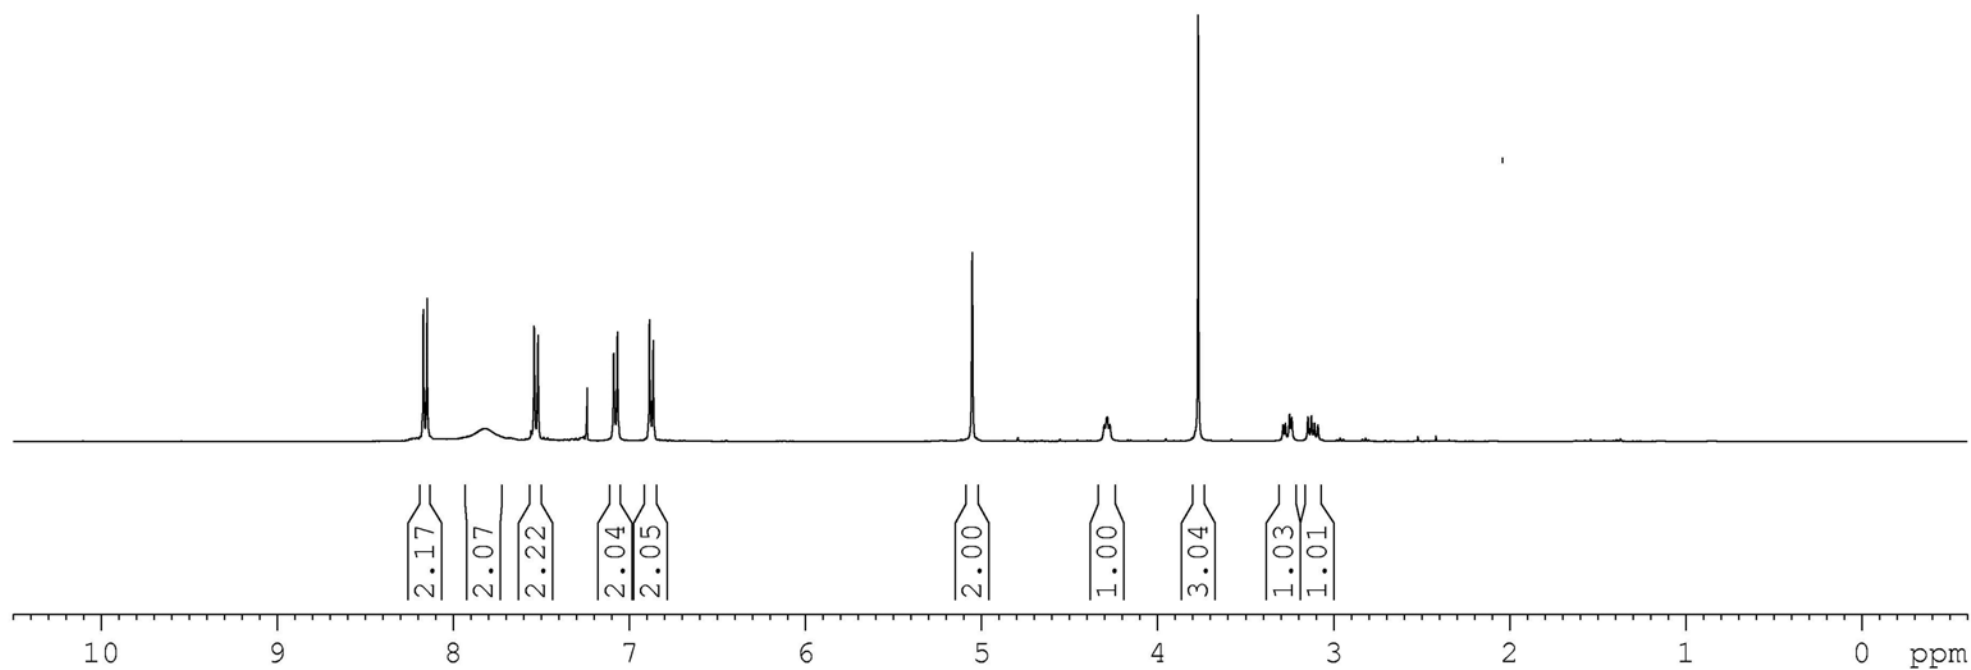

Solvent: CDCl<sub>3</sub> & NMR: 100 MHz

— 169.47  
— 158.14  
— 147.38  
— 144.26  
— 130.40  
— 127.52  
— 125.07  
— 123.75  
— 115.54  
77.32  
77.00  
76.68  
68.46  
54.65  
53.59  
— 35.15

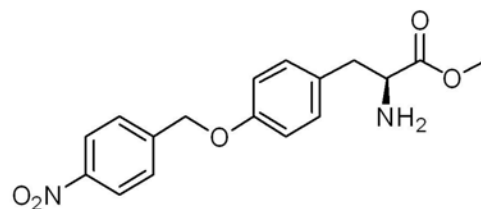

Chemical Formula: C<sub>17</sub>H<sub>18</sub>N<sub>2</sub>O<sub>5</sub>  
Molecular Weight: 330.34

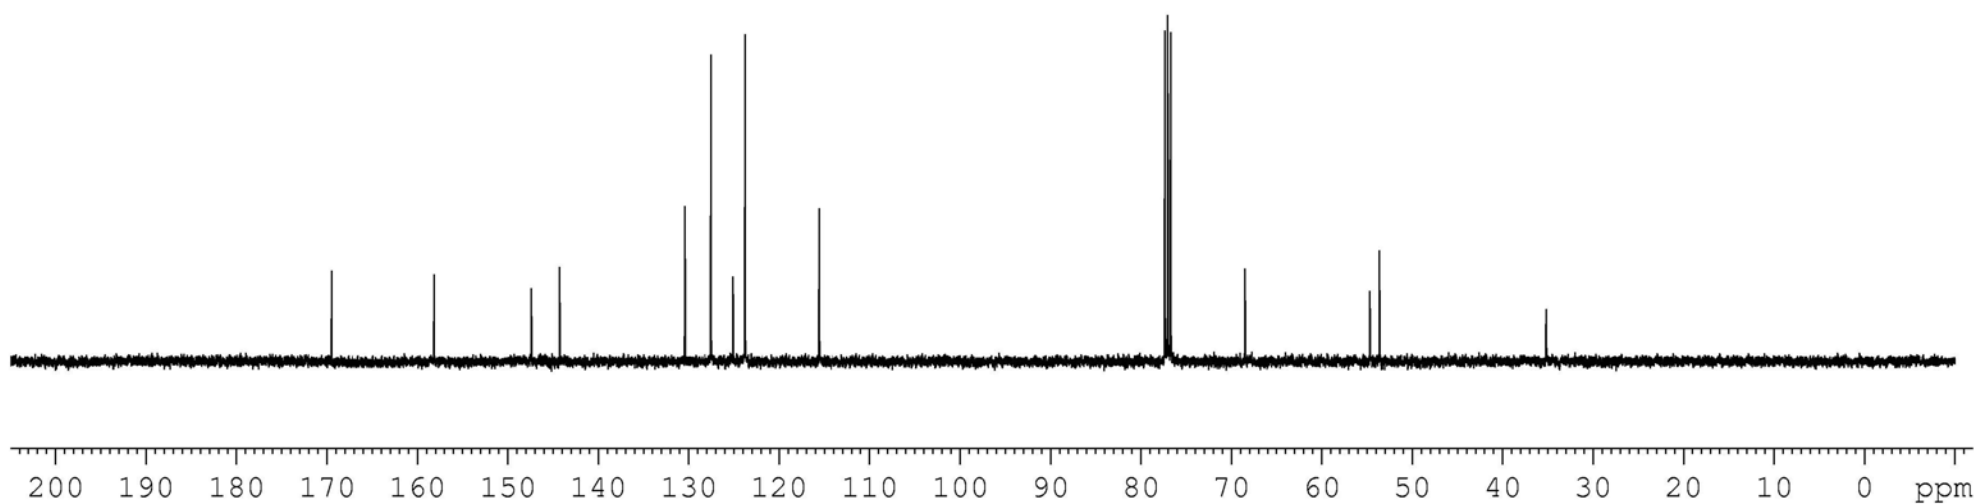

Solvent: CDCl<sub>3</sub> & NMR: 400 MHz

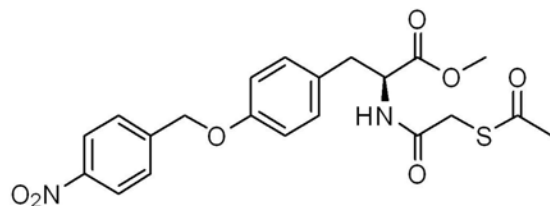

Chemical Formula: C<sub>21</sub>H<sub>22</sub>N<sub>2</sub>O<sub>7</sub>S  
Molecular Weight: 446.47

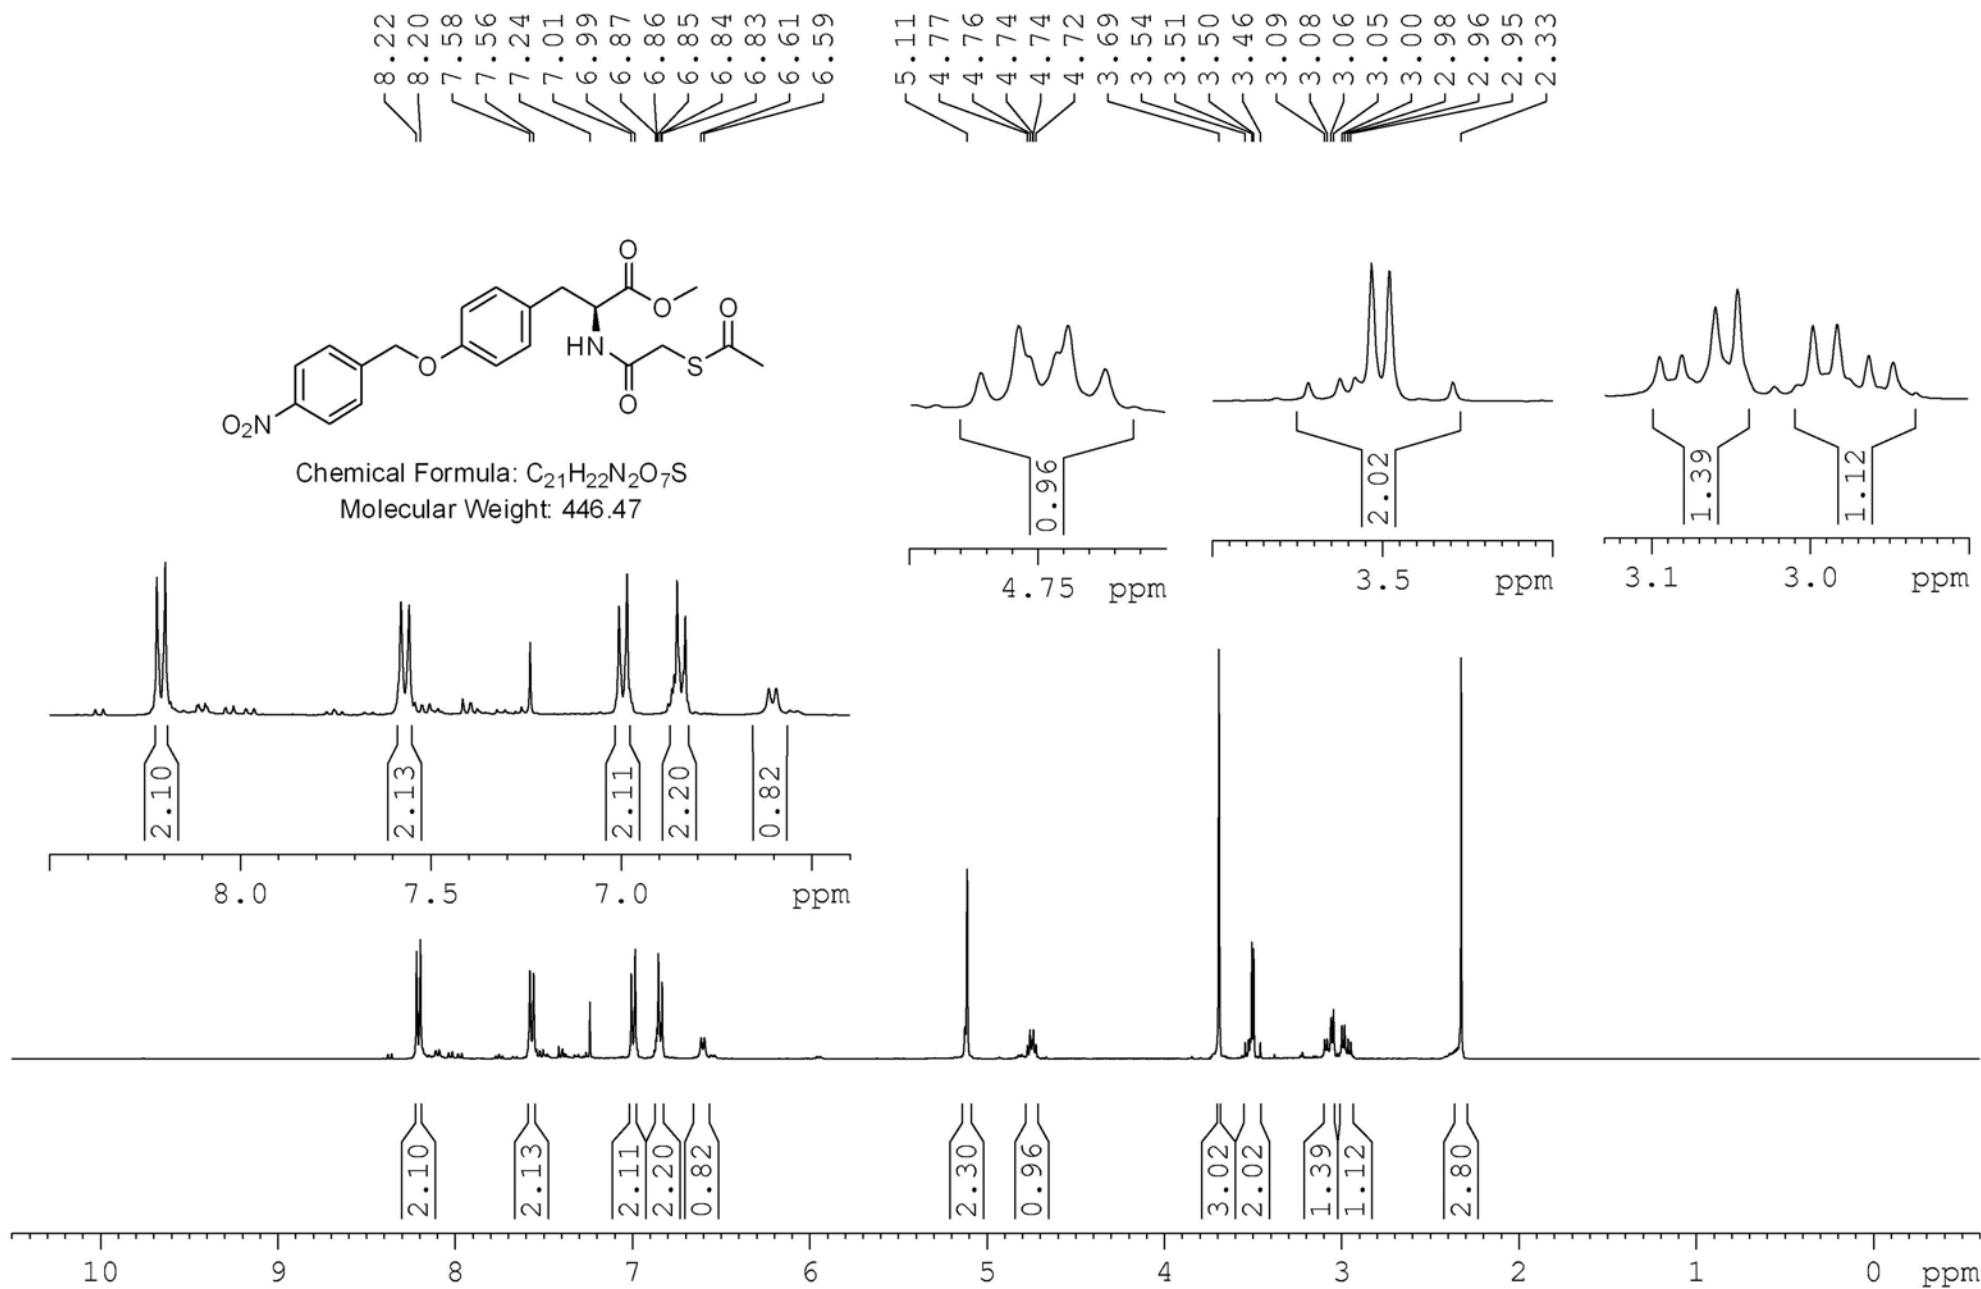

Solvent: CDCl<sub>3</sub> & NMR: 100 MHz

— 195.14

— 171.49

— 167.53

— 157.20

— 147.49

— 144.40

— 130.44

— 128.57

— 127.54

— 123.75

— 114.76

— 68.58

— 53.47

— 52.34

— 36.75

— 32.73

— 30.12

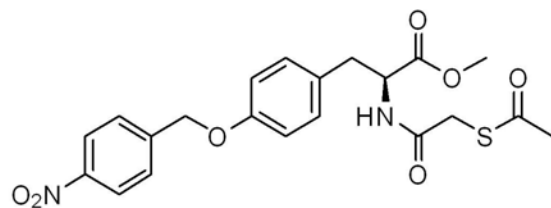

Chemical Formula: C<sub>21</sub>H<sub>22</sub>N<sub>2</sub>O<sub>7</sub>S

Molecular Weight: 446.47

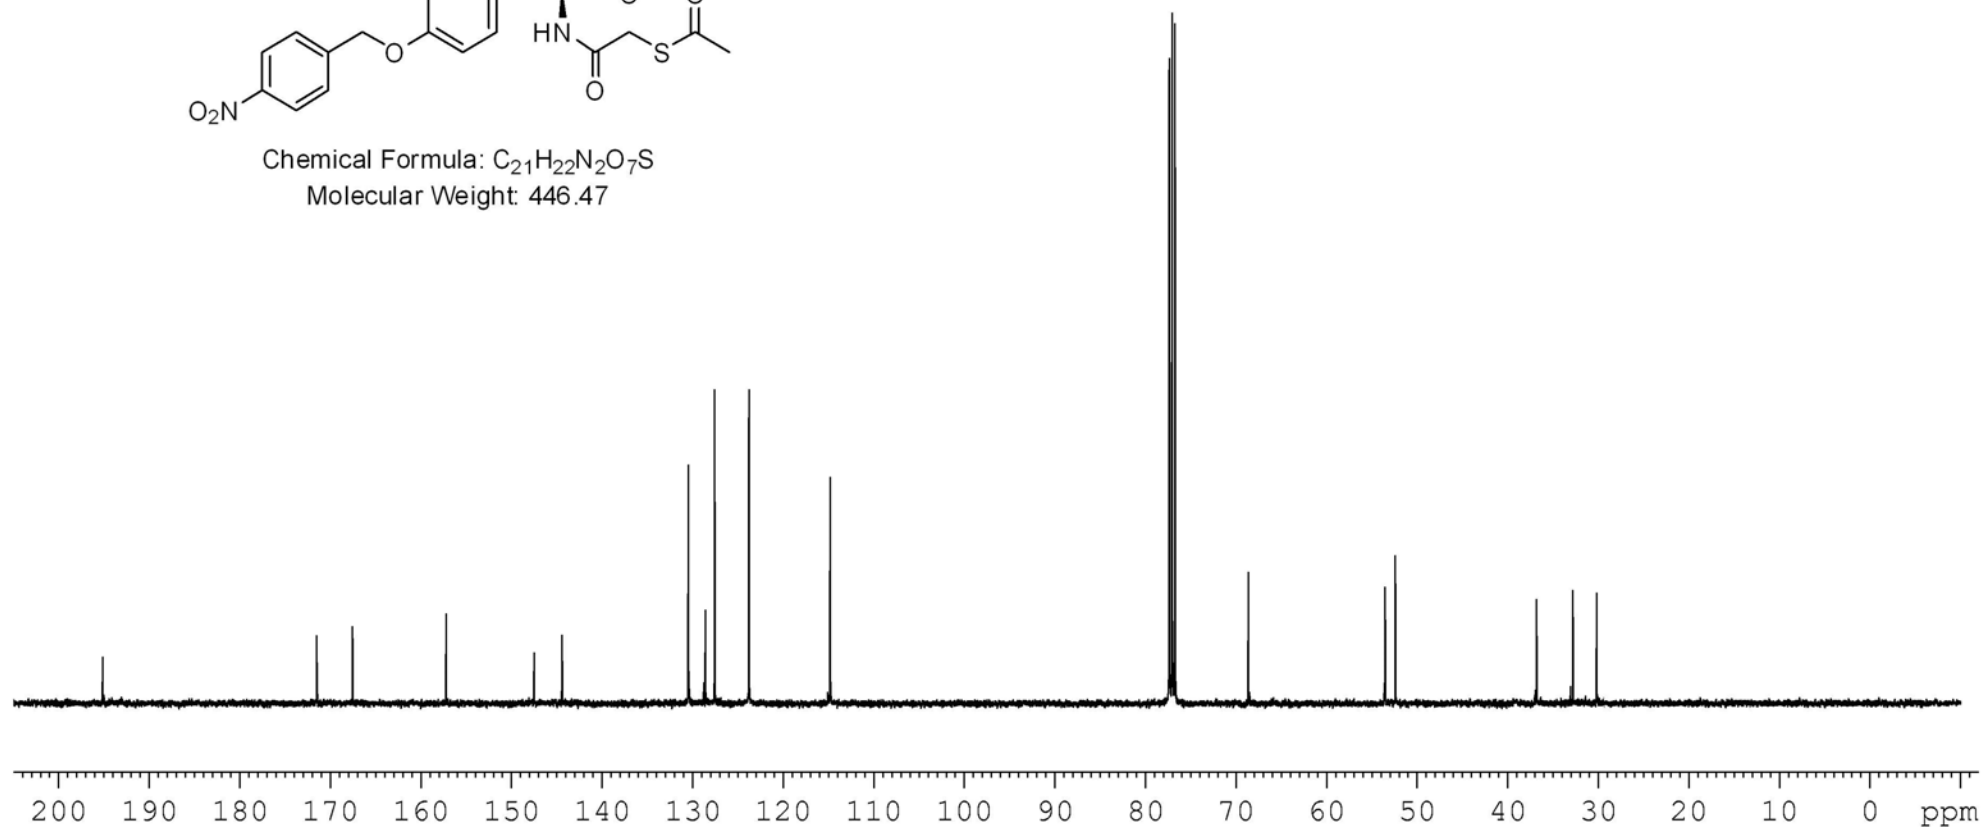

Solvent: CDCl<sub>3</sub> & NMR: 400 MHz

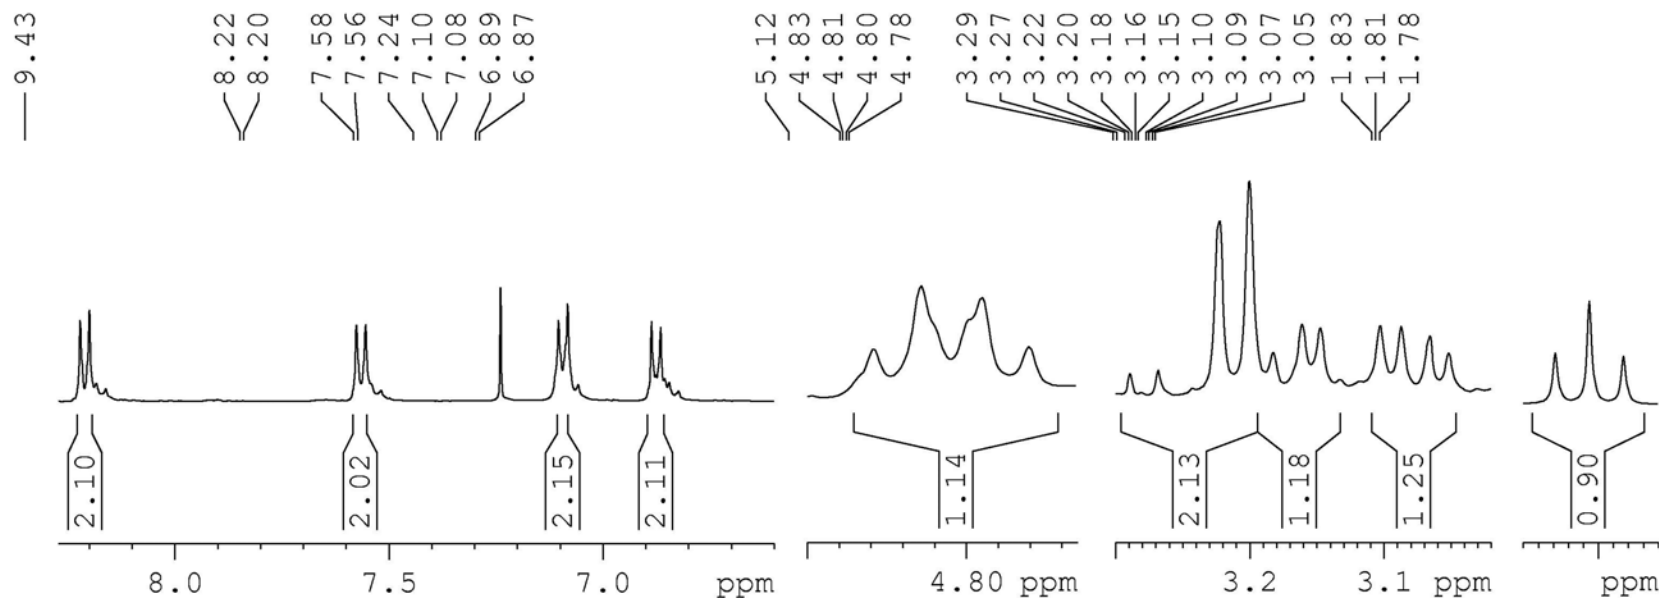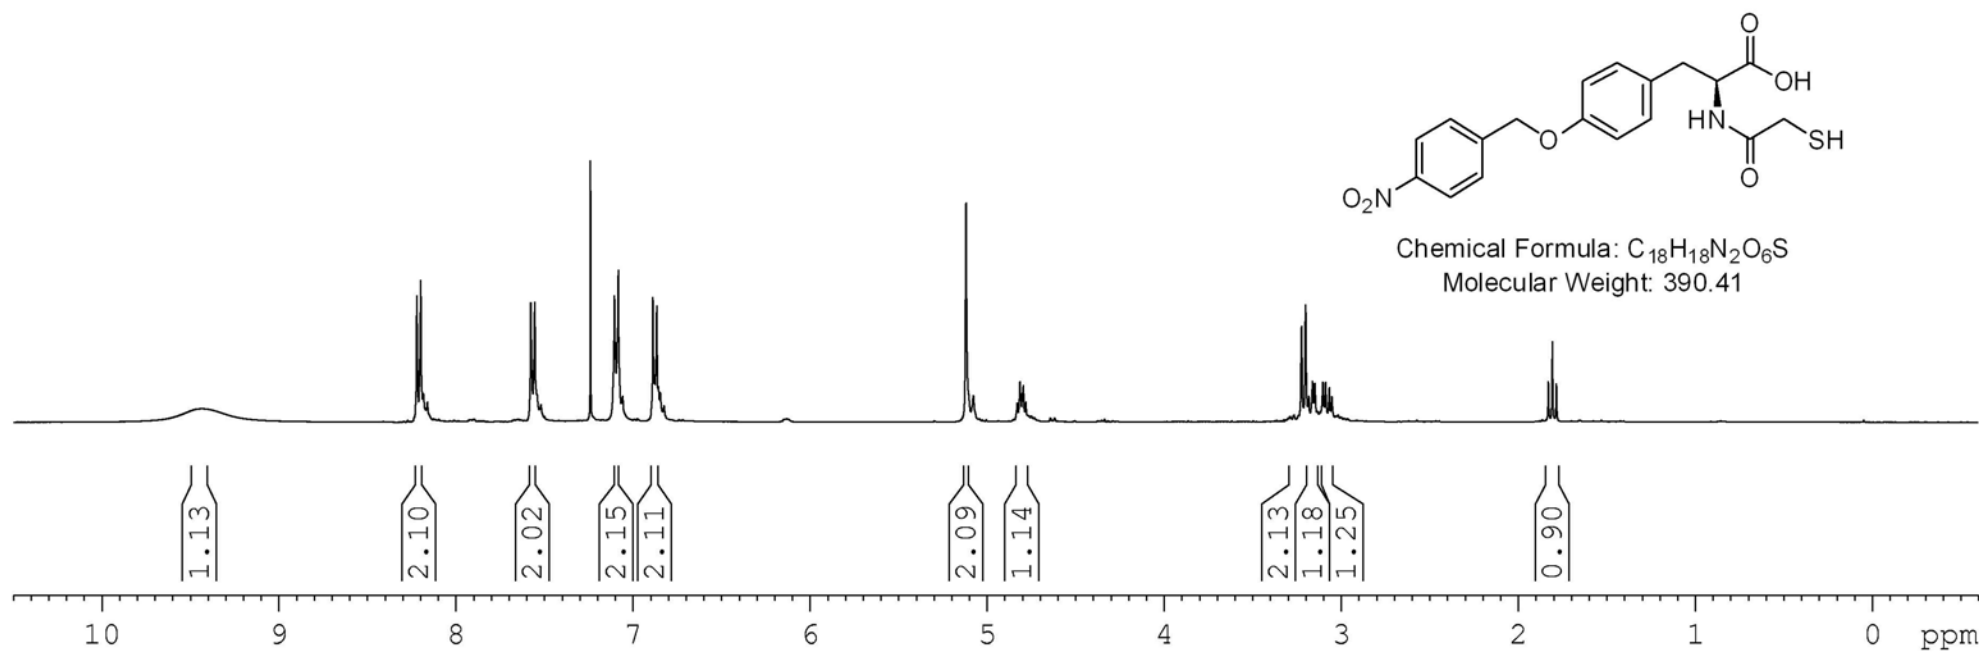

Solvent: CDCl<sub>3</sub> & NMR: 100 MHz

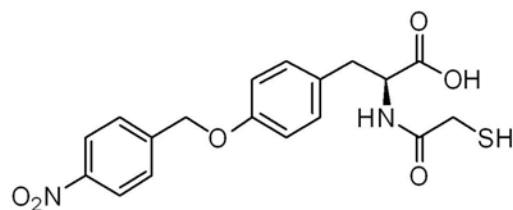

Chemical Formula: C<sub>18</sub>H<sub>18</sub>N<sub>2</sub>O<sub>6</sub>S  
Molecular Weight: 390.41

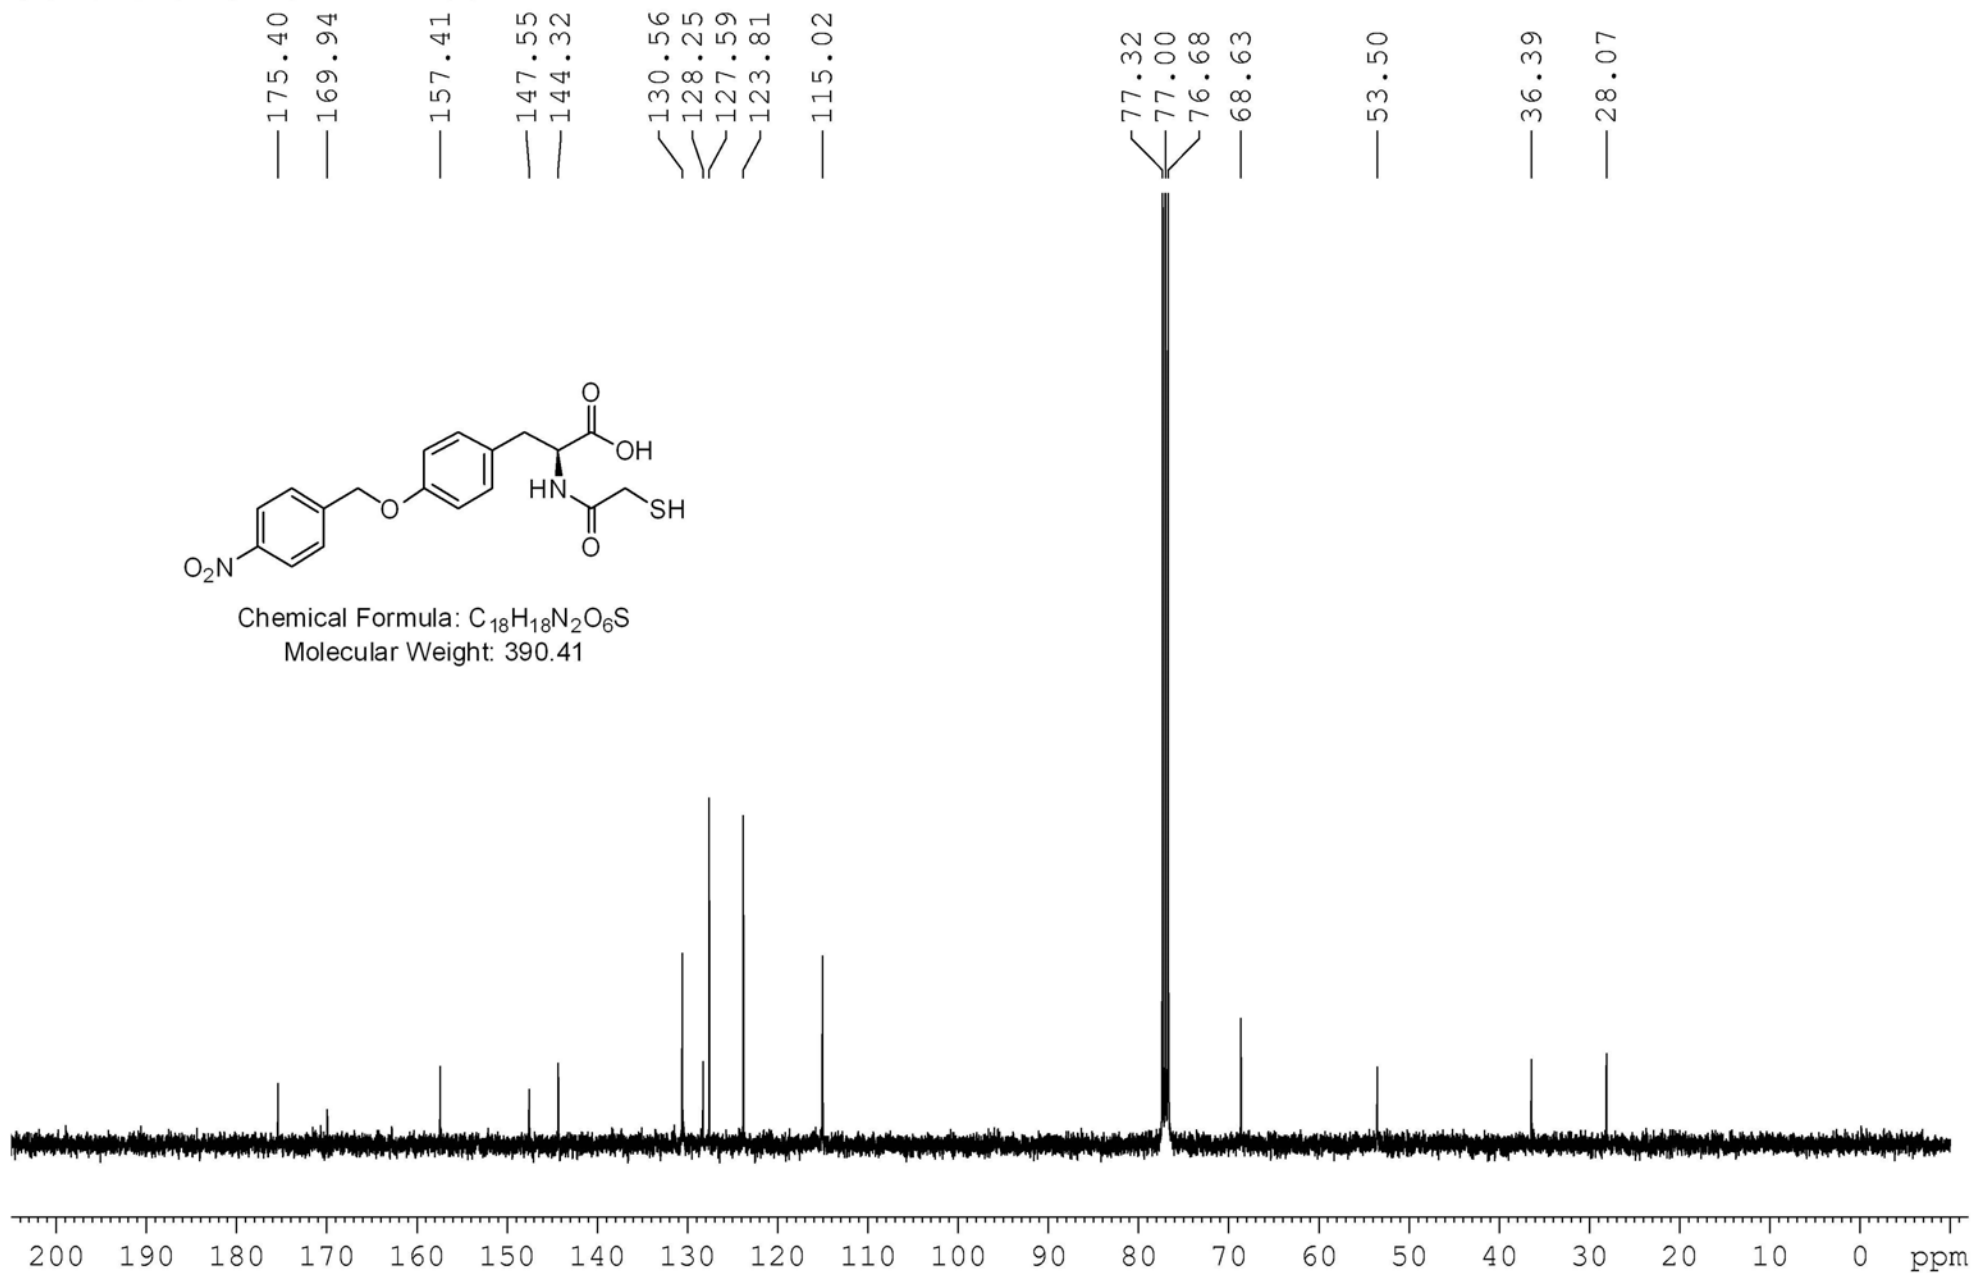

Solvent: CDCl<sub>3</sub> & NMR: 500 MHz

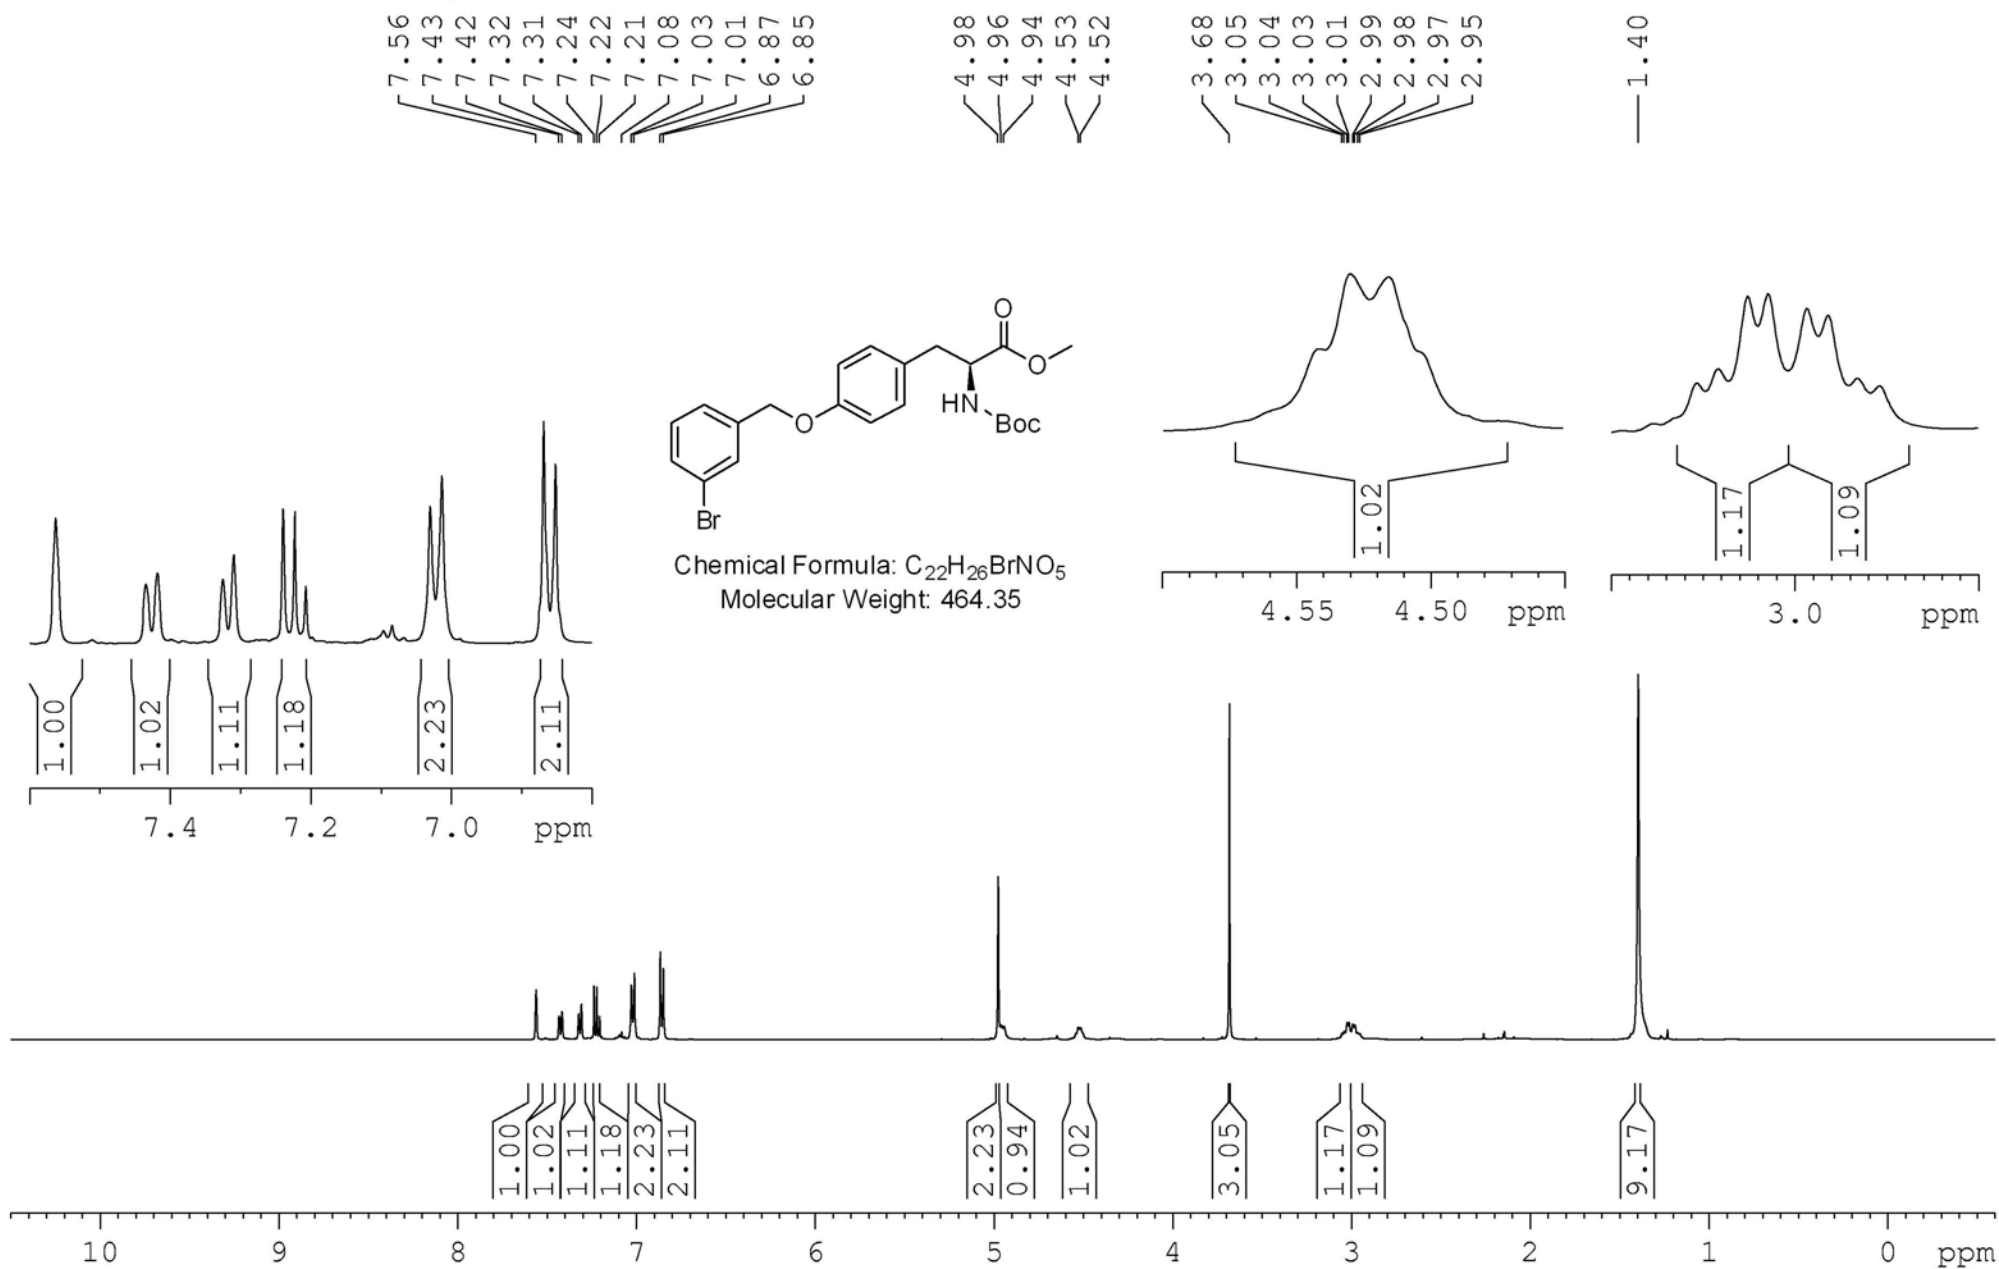

Solvent: CDCl<sub>3</sub> & NMR: 125 MHz

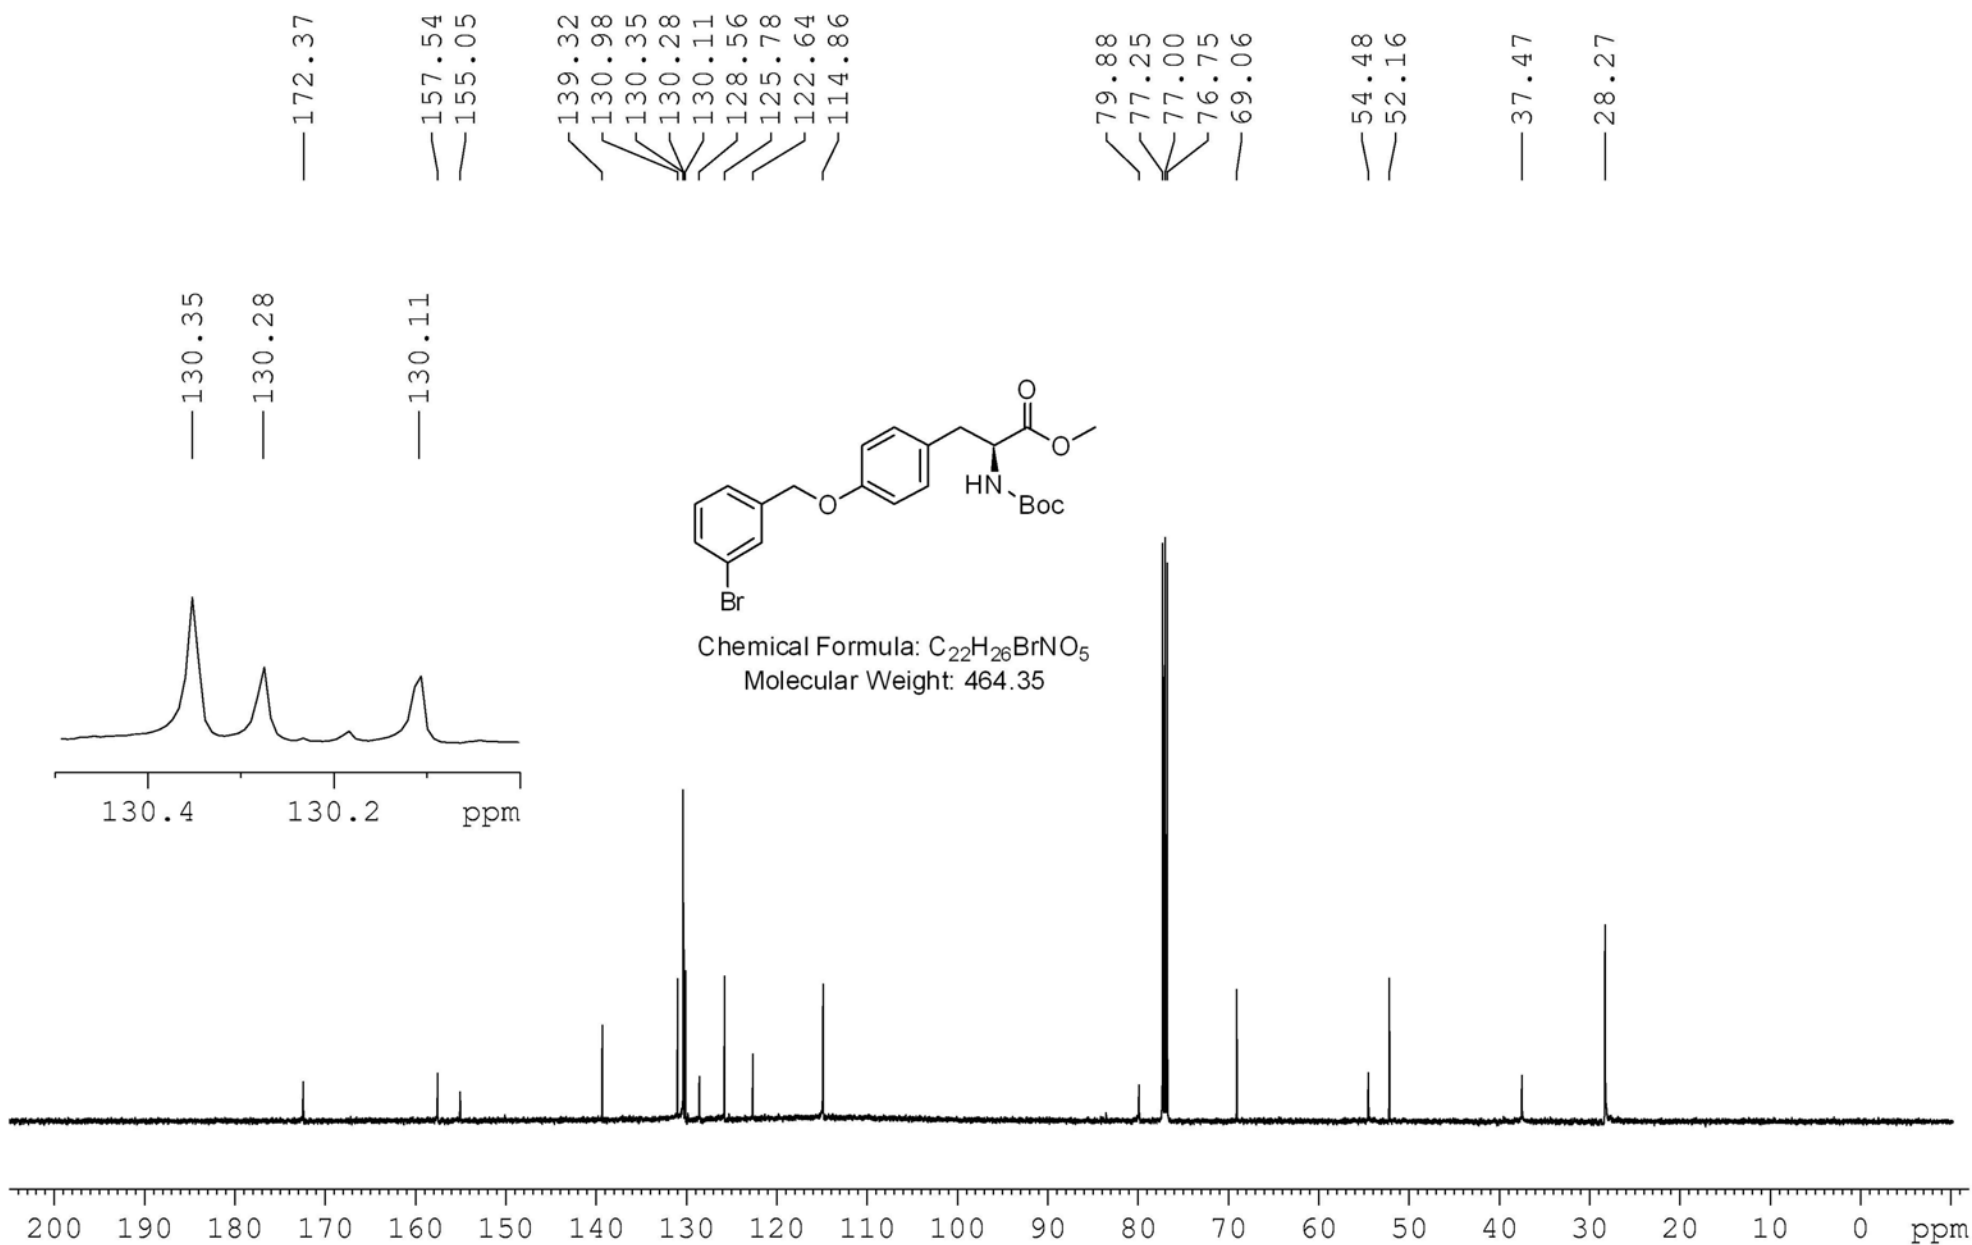

Solvent: CDCl<sub>3</sub> & NMR: 500 MHz

7.56  
7.43  
7.41  
7.32  
7.31  
7.24  
7.23  
7.22  
7.20  
7.10  
7.08  
6.88  
6.86

— 4.98

3.69  
3.03  
3.02  
3.00  
2.99  
2.84  
2.82  
2.81  
2.79  
— 1.90

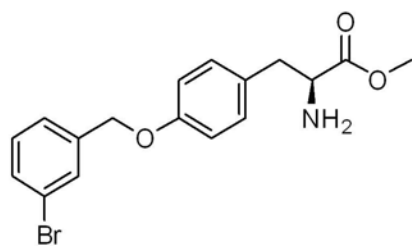

Chemical Formula: C<sub>17</sub>H<sub>18</sub>BrNO<sub>3</sub>

Molecular Weight: 364.23

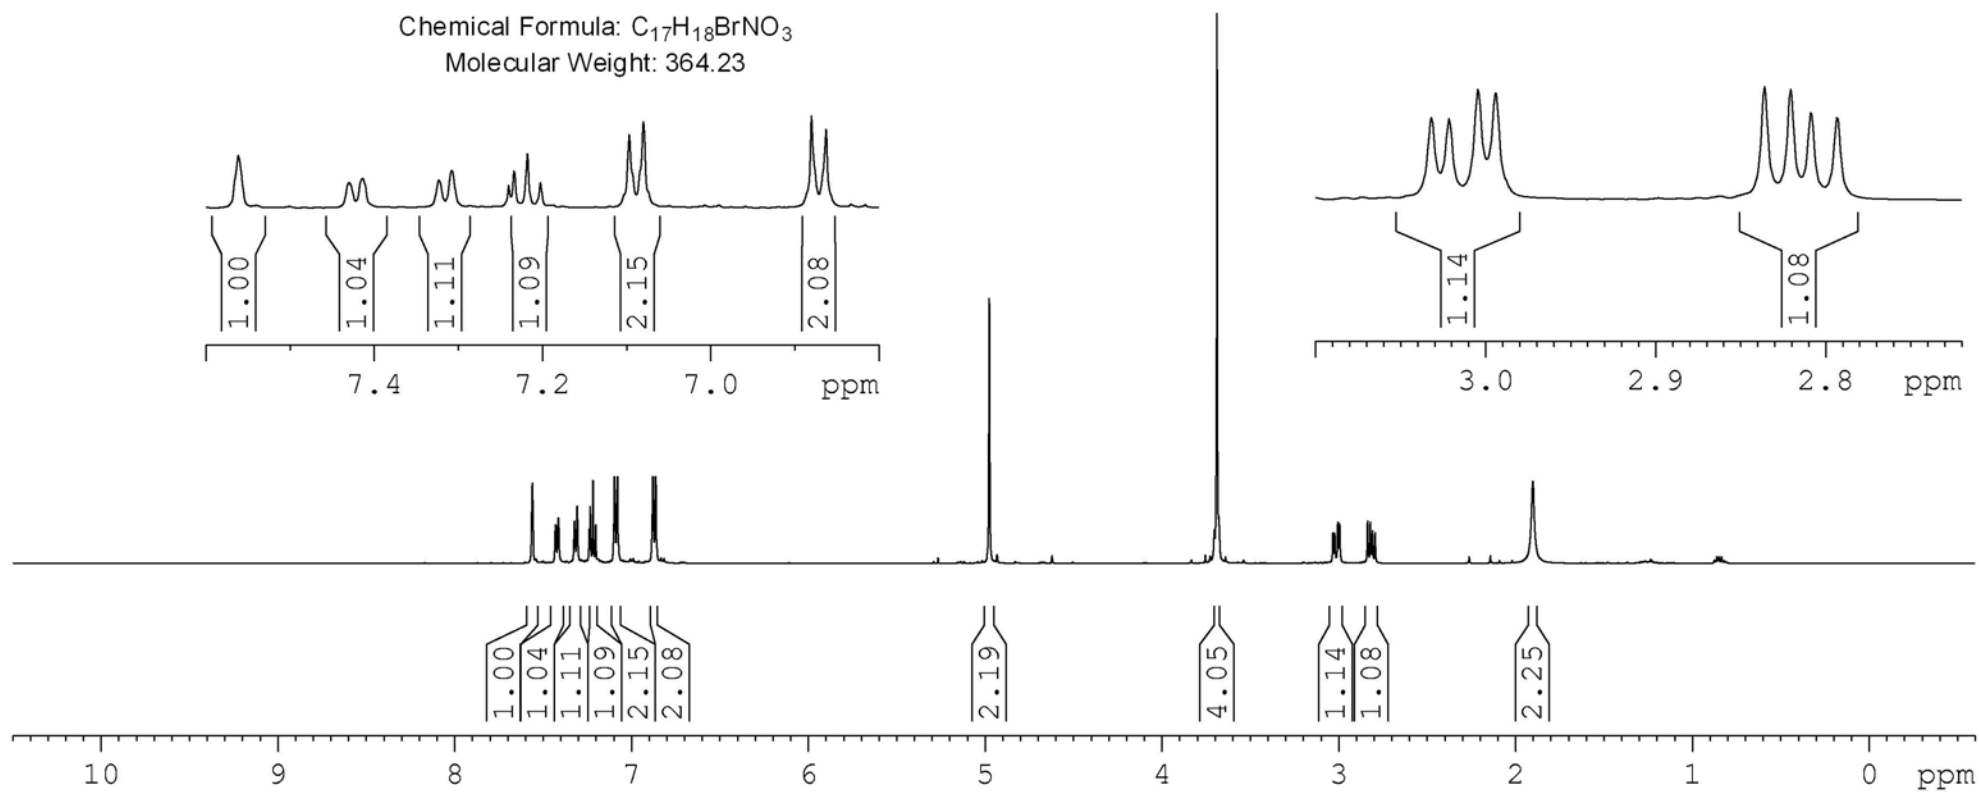

Solvent: CDCl<sub>3</sub> & NMR: 125 MHz

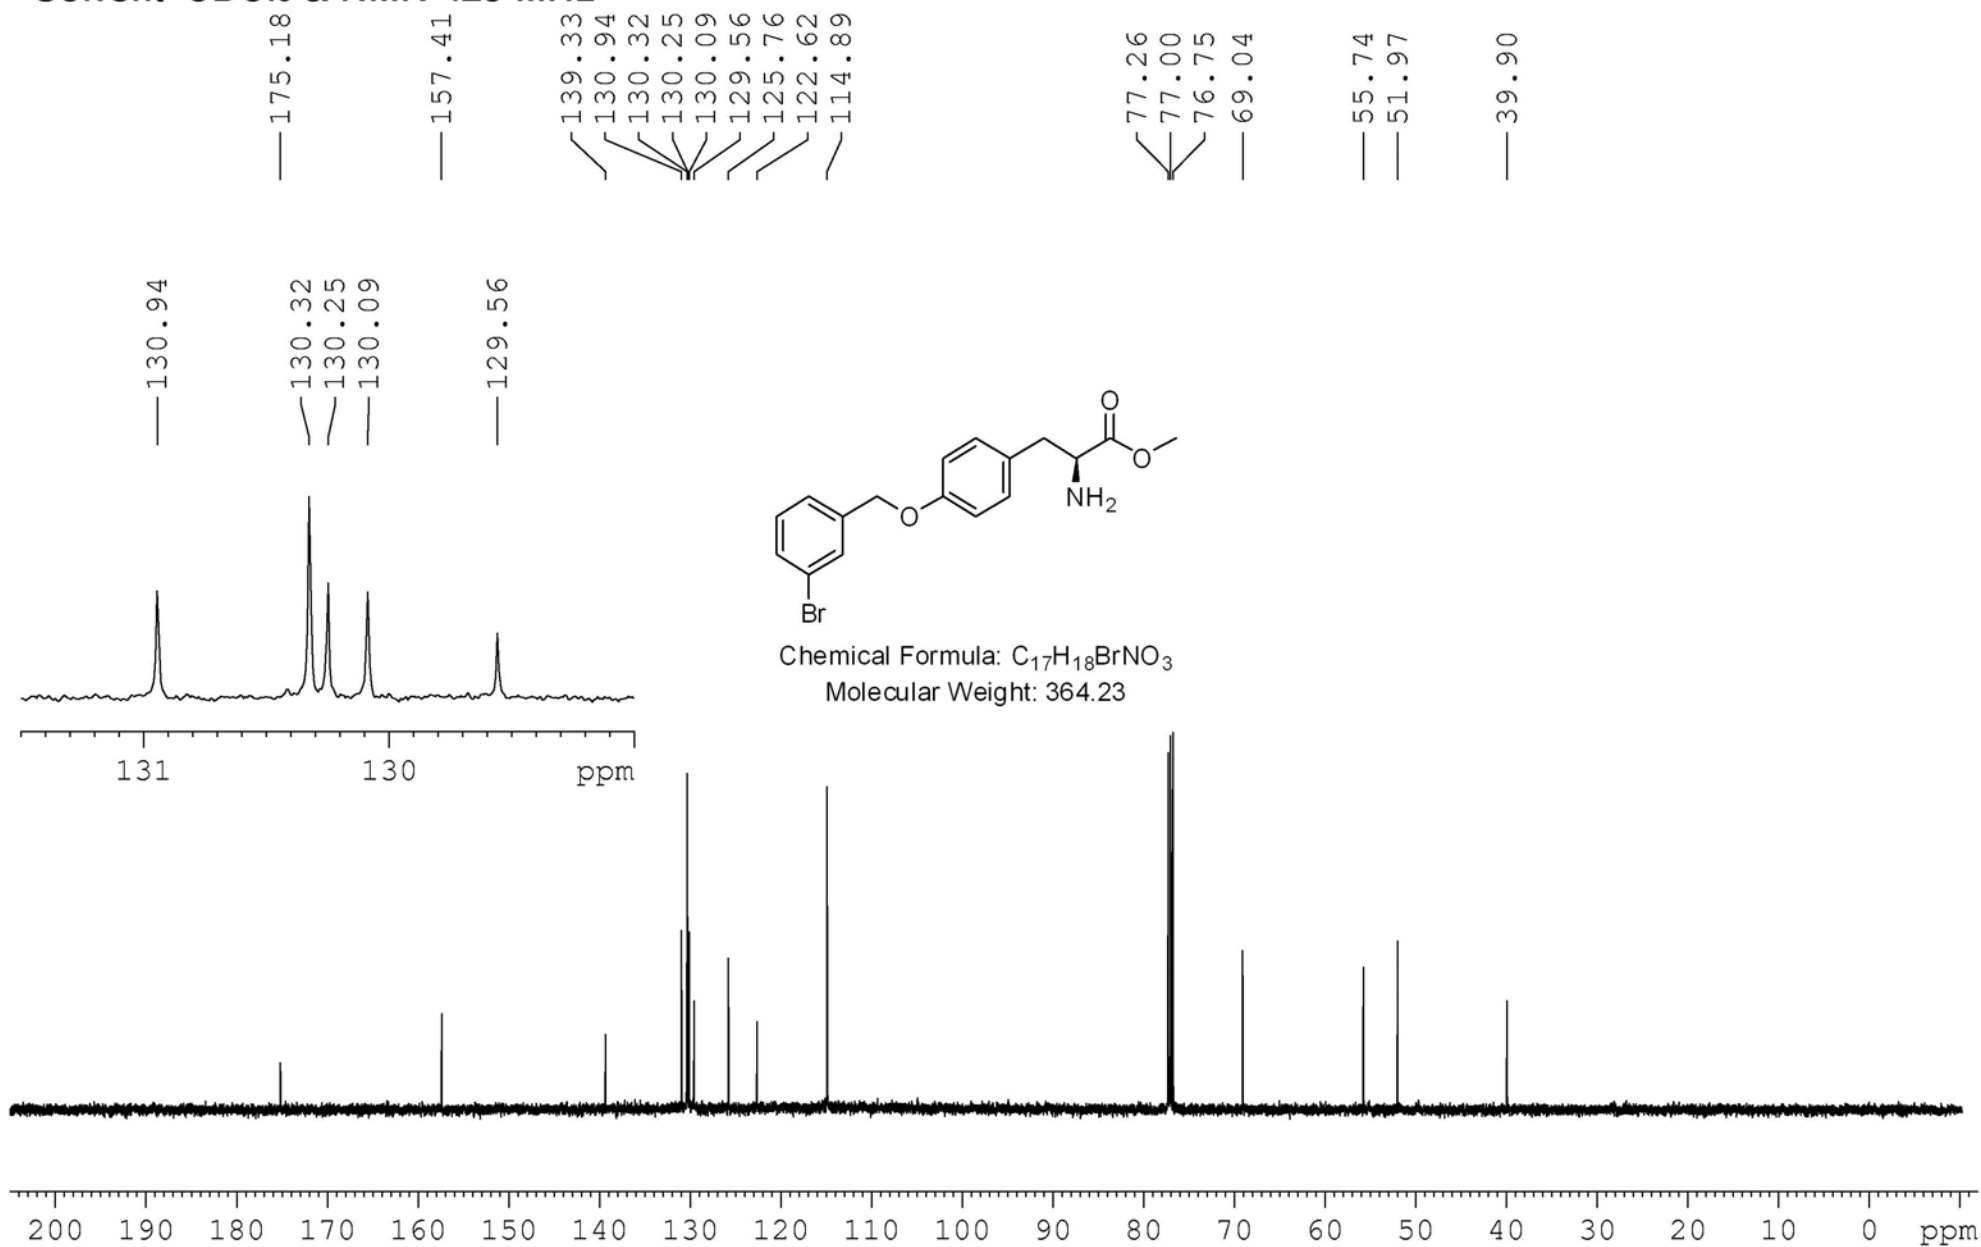

Solvent: CDCl<sub>3</sub> & NMR: 400 MHz

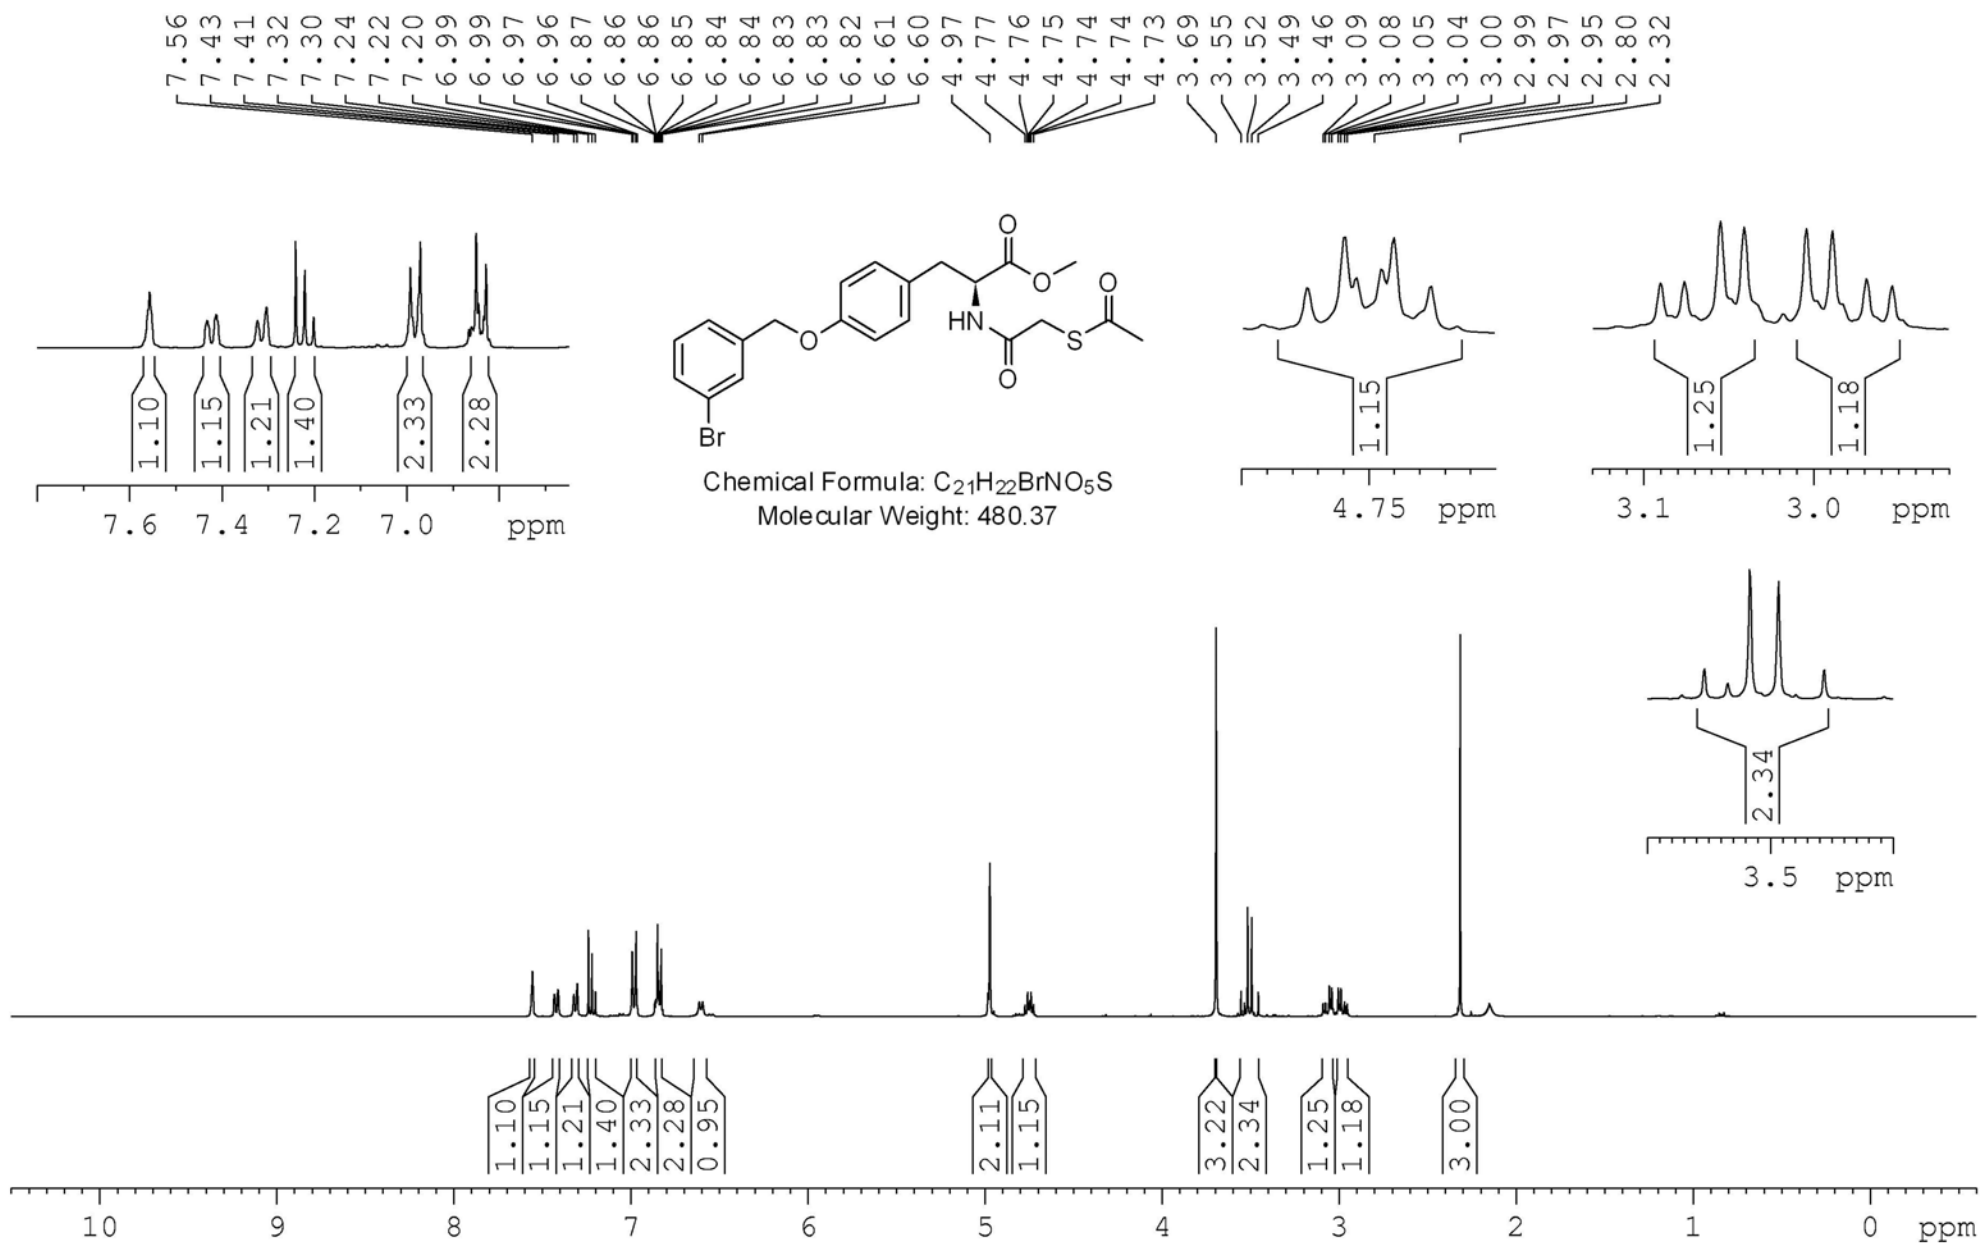

Solvent: CDCl<sub>3</sub> & NMR: 100 MHz

—195.16

—171.54

—167.55

—157.54

139.25

130.97

130.34

130.25

130.11

128.15

125.77

122.62

114.80

—69.00

53.47

52.34

—36.74

—32.73

—30.12

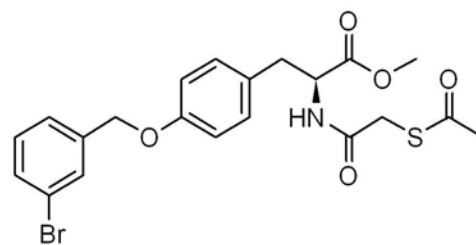

Chemical Formula: C<sub>21</sub>H<sub>22</sub>BrNO<sub>5</sub>S

Molecular Weight: 480.37

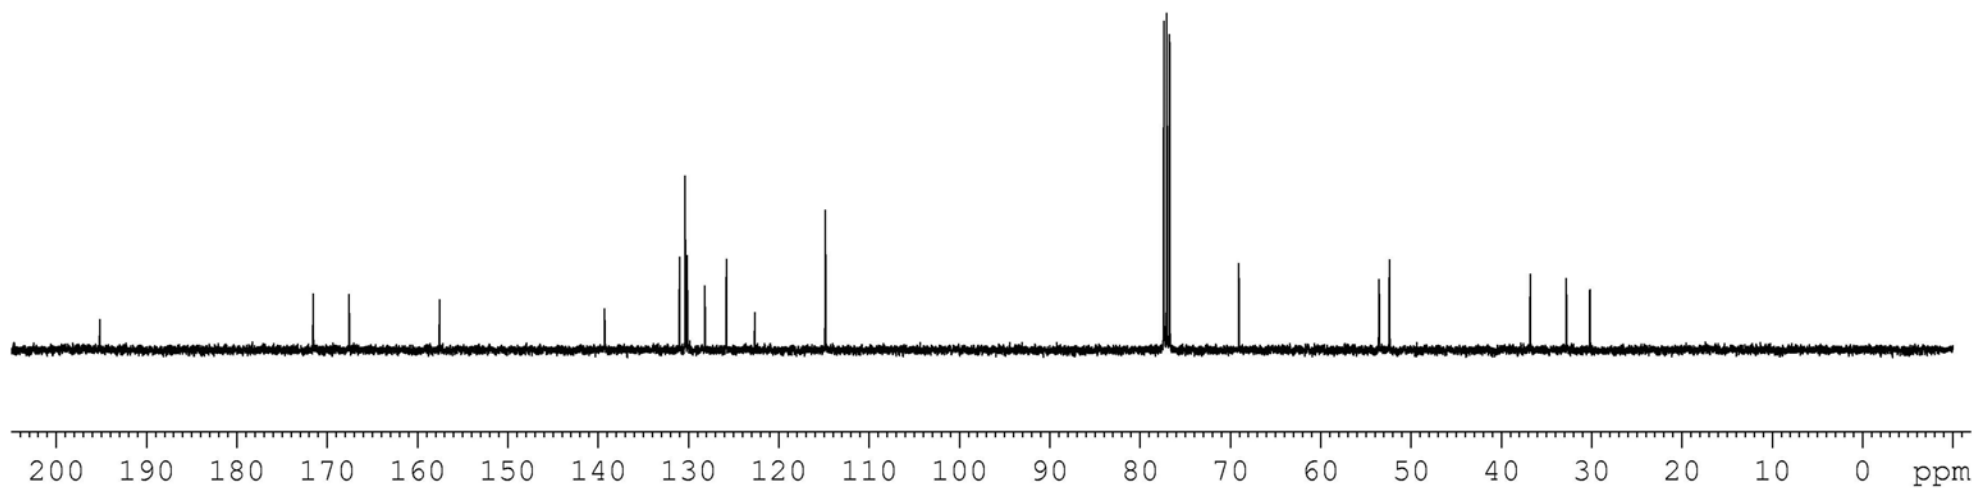

Solvent: CD<sub>3</sub>OD & NMR: 400 MHz

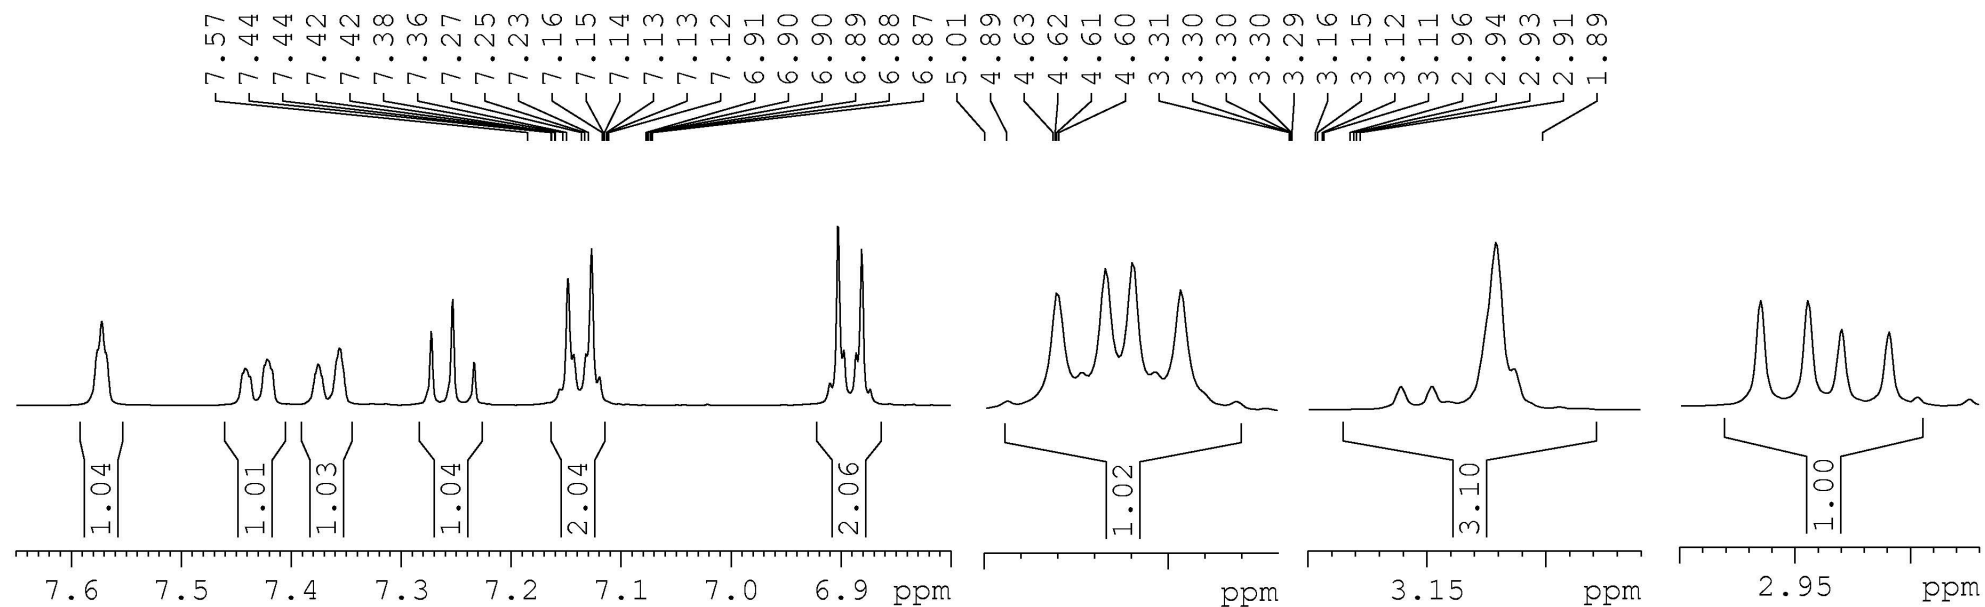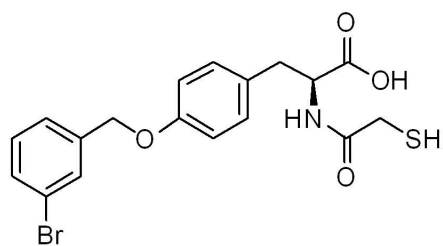

Chemical Formula: C<sub>18</sub>H<sub>18</sub>BrNO<sub>4</sub>S  
Molecular Weight: 424.31

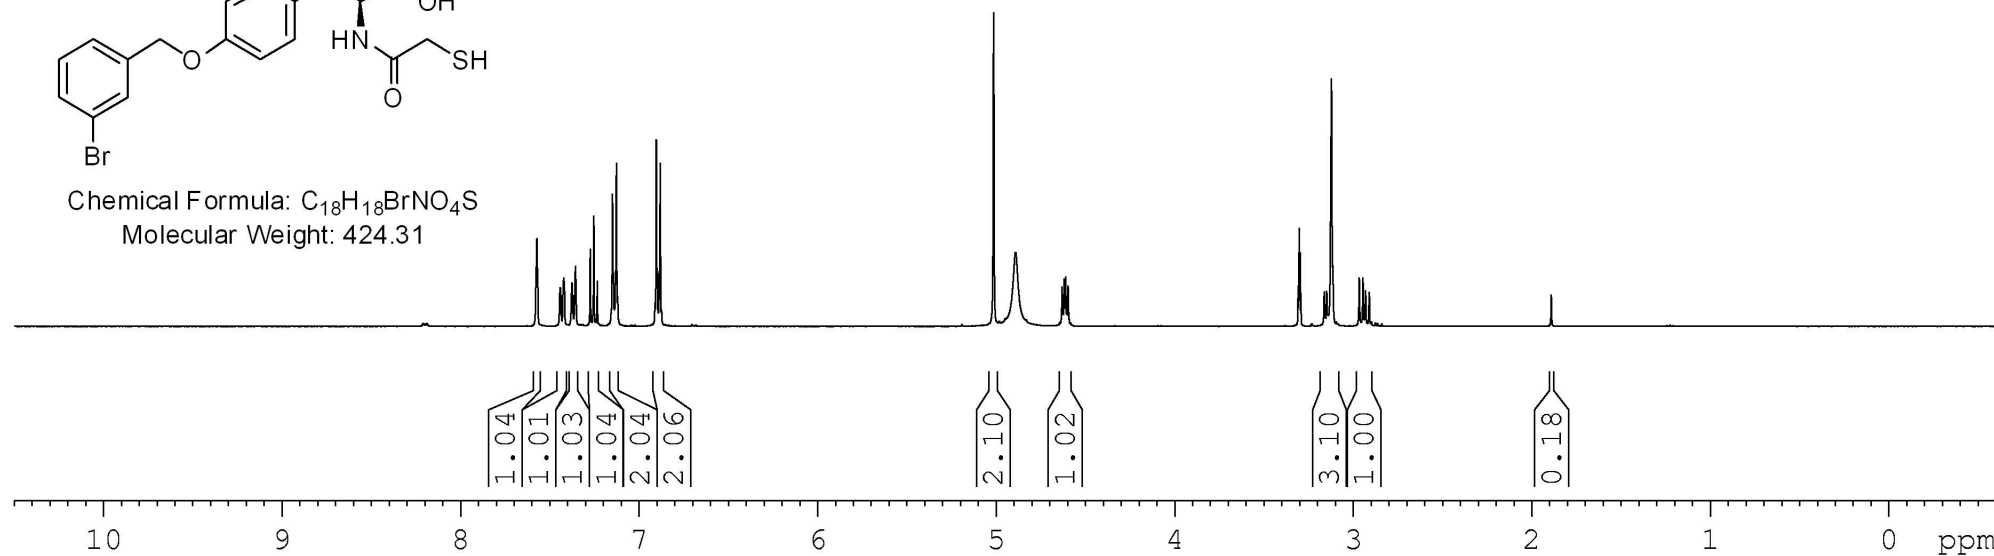

Solvent: CD<sub>3</sub>OD & NMR: 100 MHz

174.34  
172.89  
158.90  
141.46  
131.80  
131.48  
131.30  
131.25  
130.56  
127.08  
123.41  
115.89

69.92

55.28

37.50

28.00

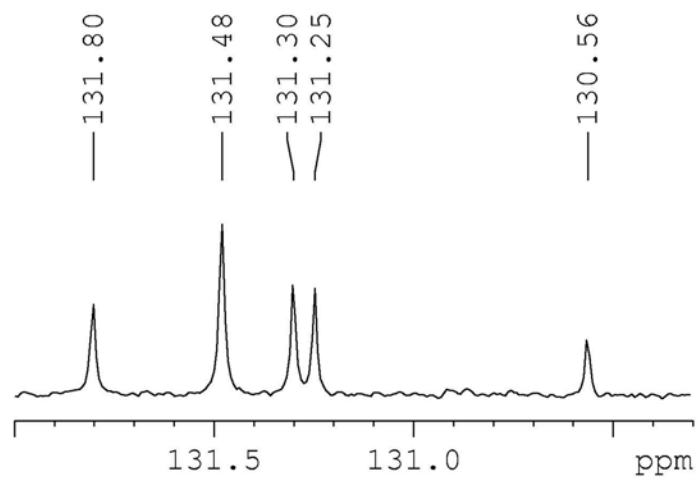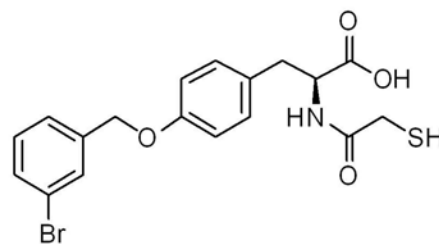

Chemical Formula: C<sub>18</sub>H<sub>18</sub>BrNO<sub>4</sub>S  
Molecular Weight: 424.31

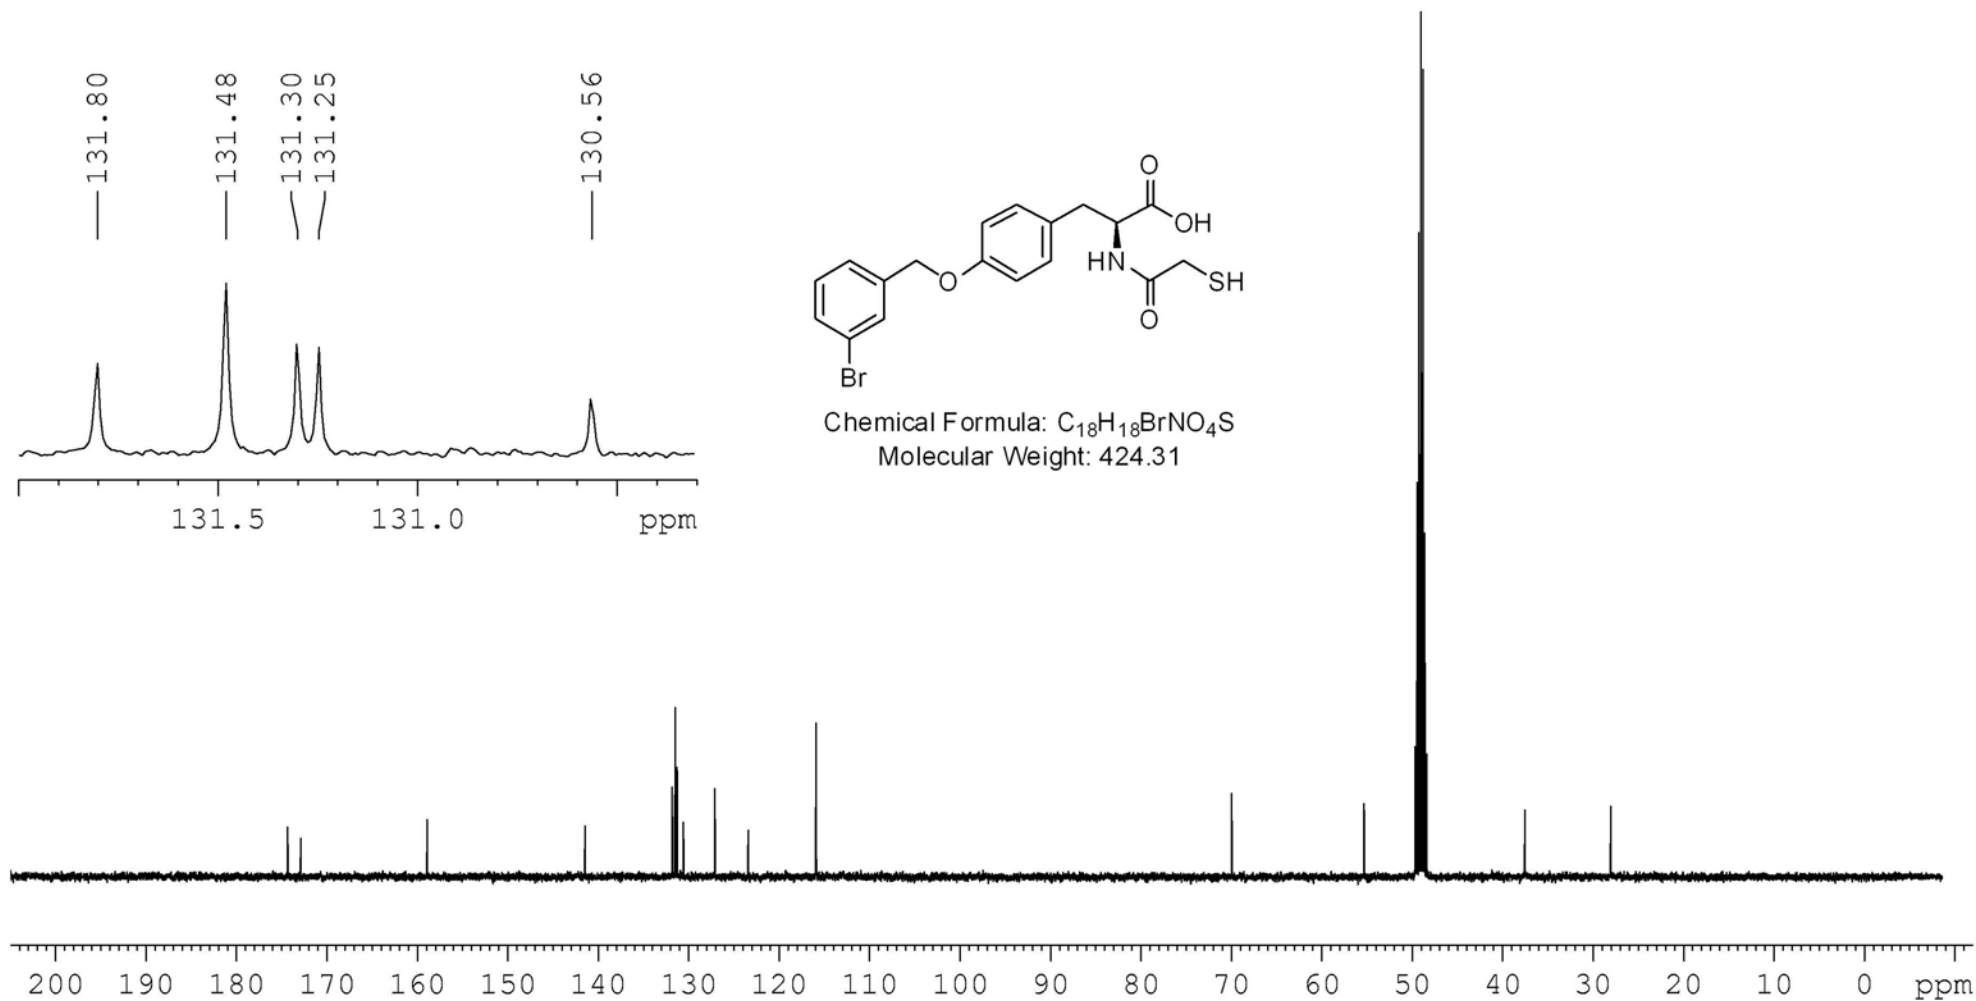

Solvent:  $\text{CDCl}_3$  & NMR: 500 MHz

7.49  
7.47  
7.28  
7.26  
7.24  
7.02  
7.01  
6.86  
6.84

— 4.96  
4.53  
4.51

3.68  
3.05  
3.04  
3.02  
3.01  
2.99  
2.98  
2.96  
2.95

— 1.39

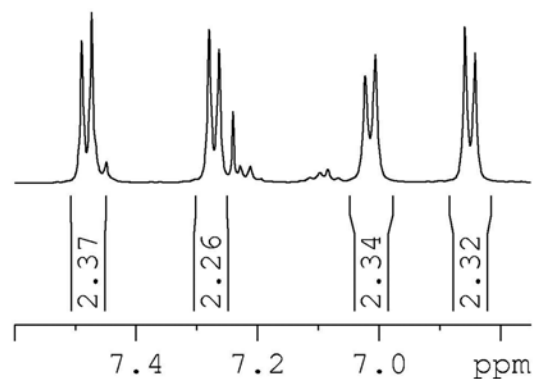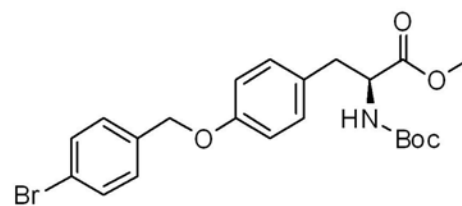

Chemical Formula:  $\text{C}_{22}\text{H}_{26}\text{BrNO}_5$   
Molecular Weight: 464.35

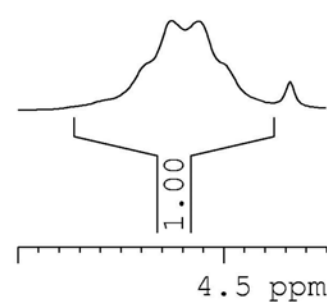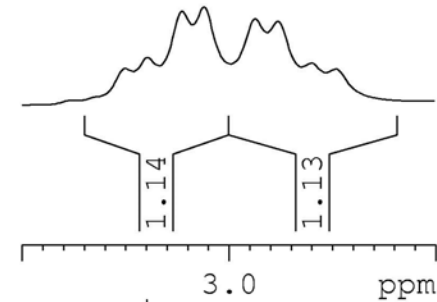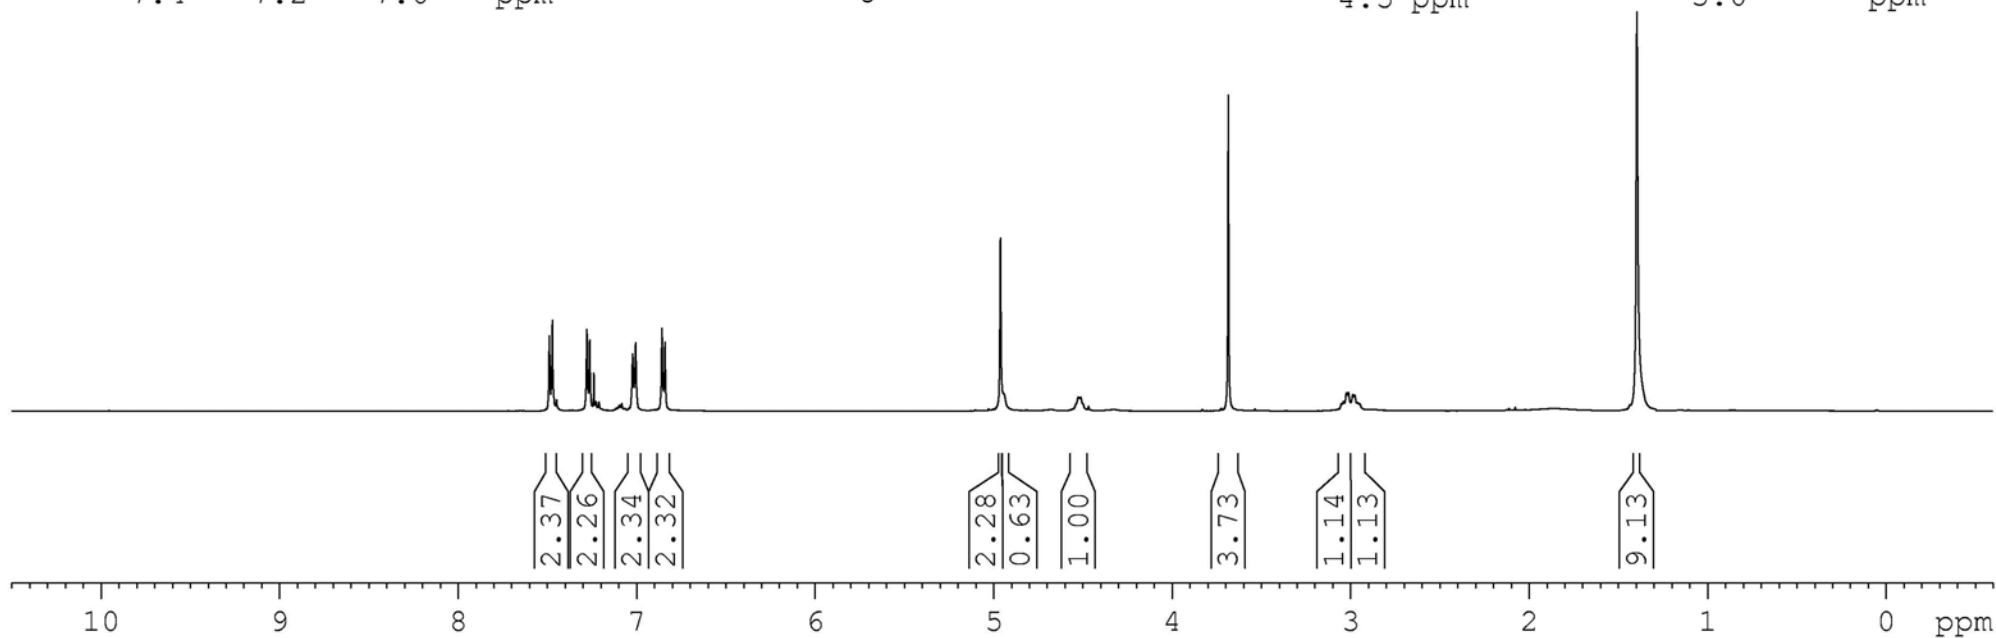

Solvent: CDCl<sub>3</sub> & NMR: 125 MHz

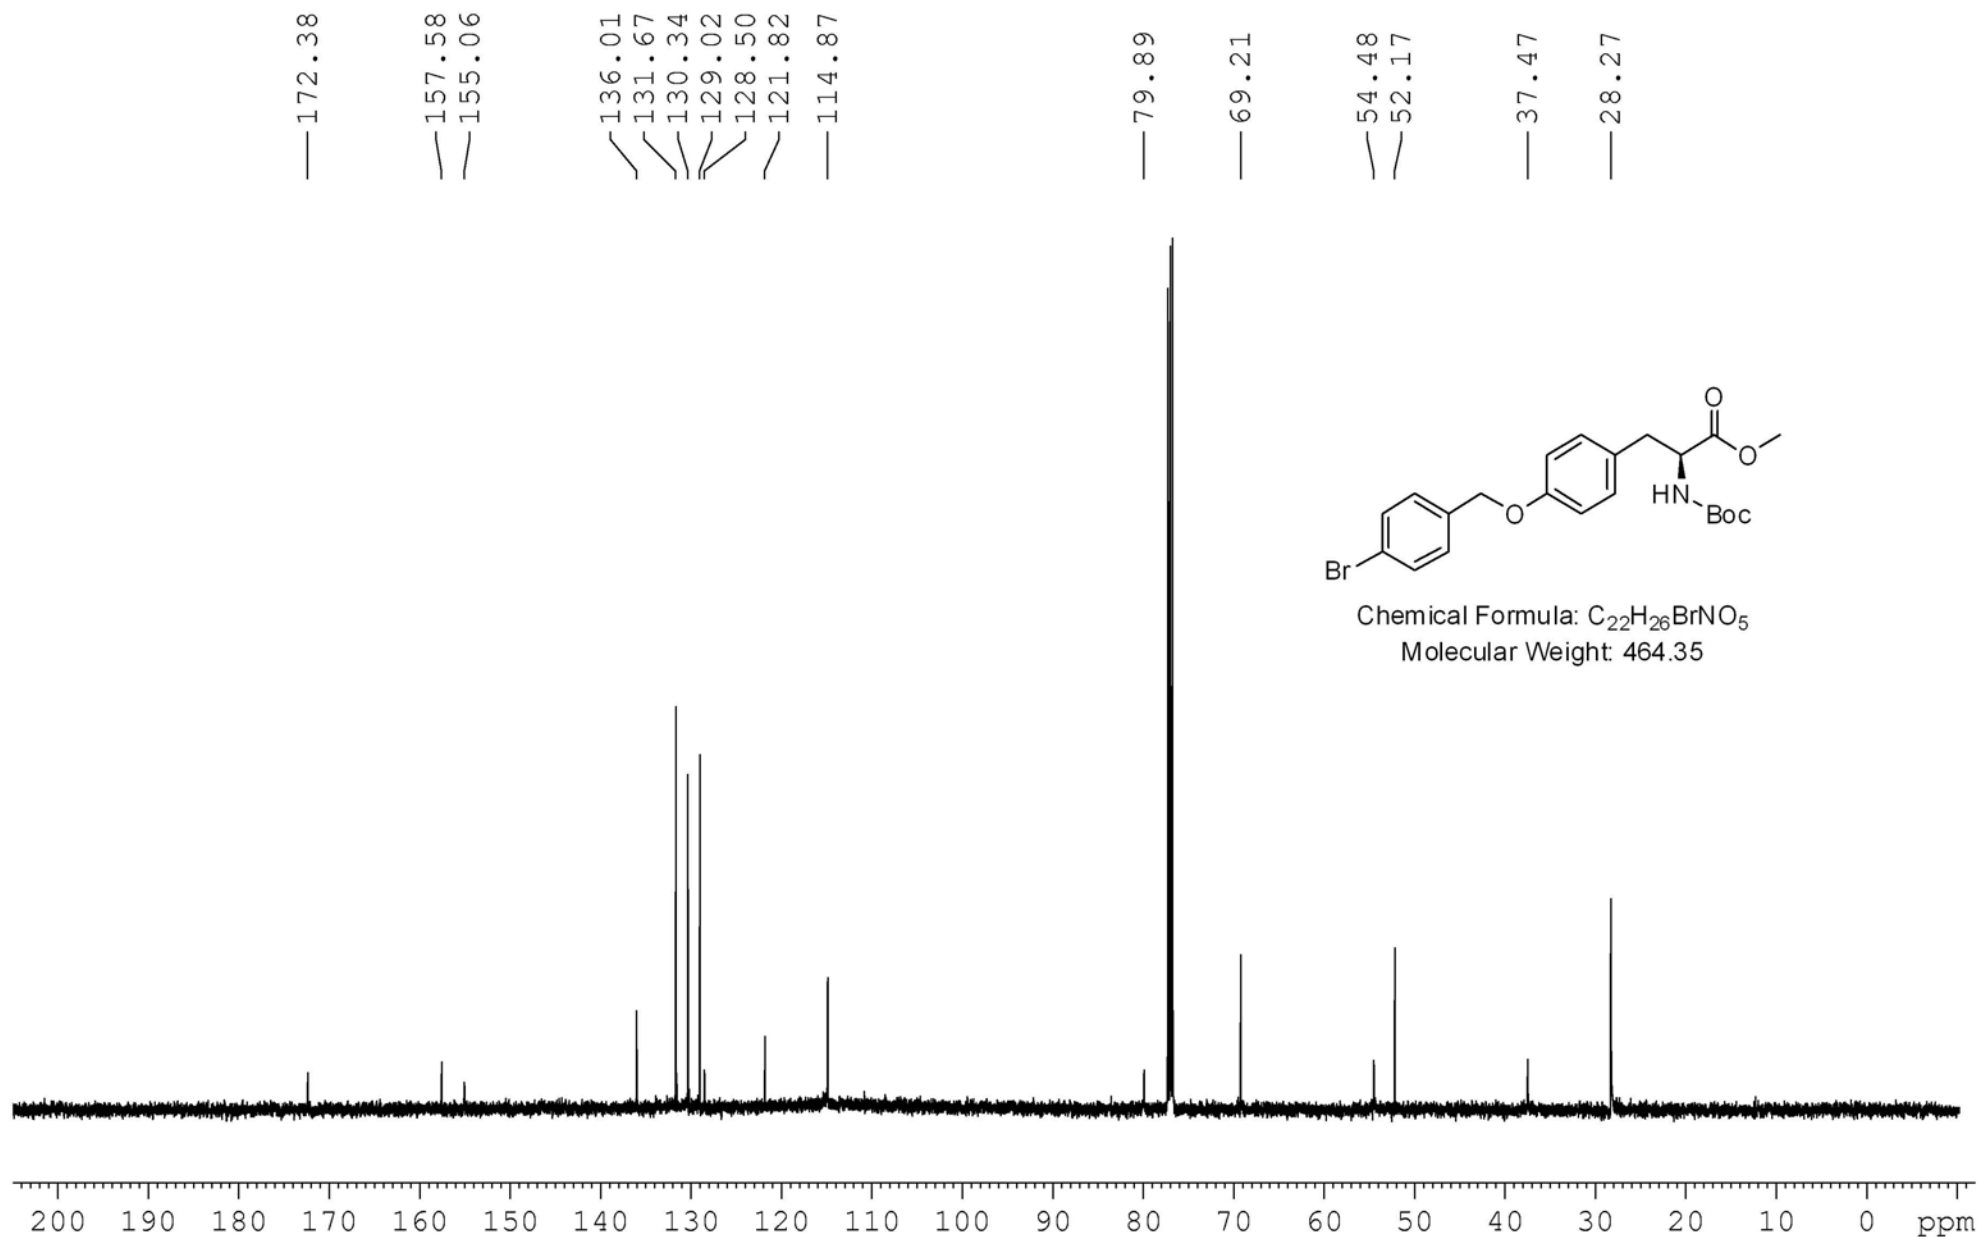

Solvent: CDCl<sub>3</sub> & NMR: 500 MHz

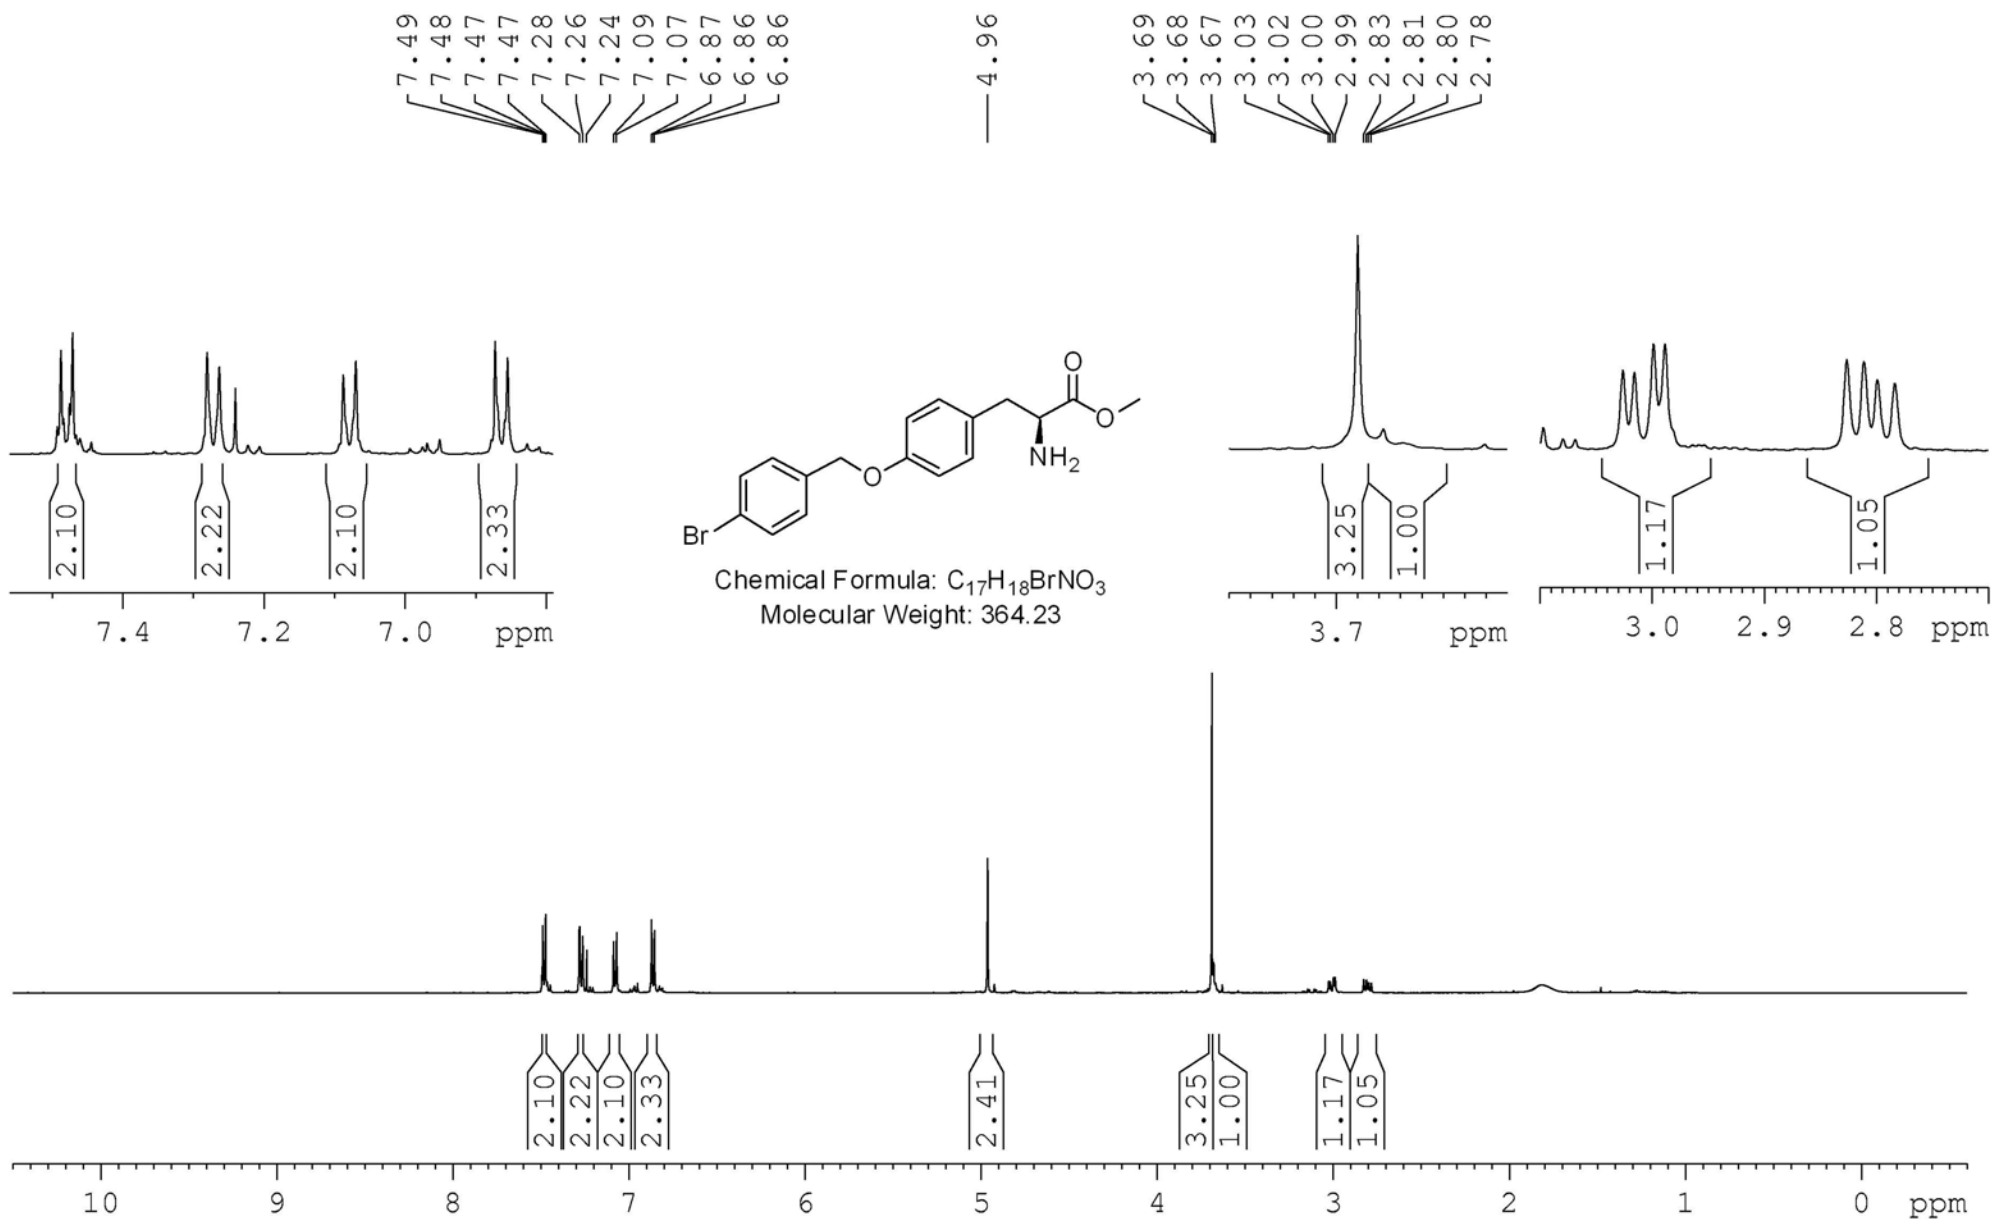

Solvent: CDCl<sub>3</sub> & NMR: 125 MHz

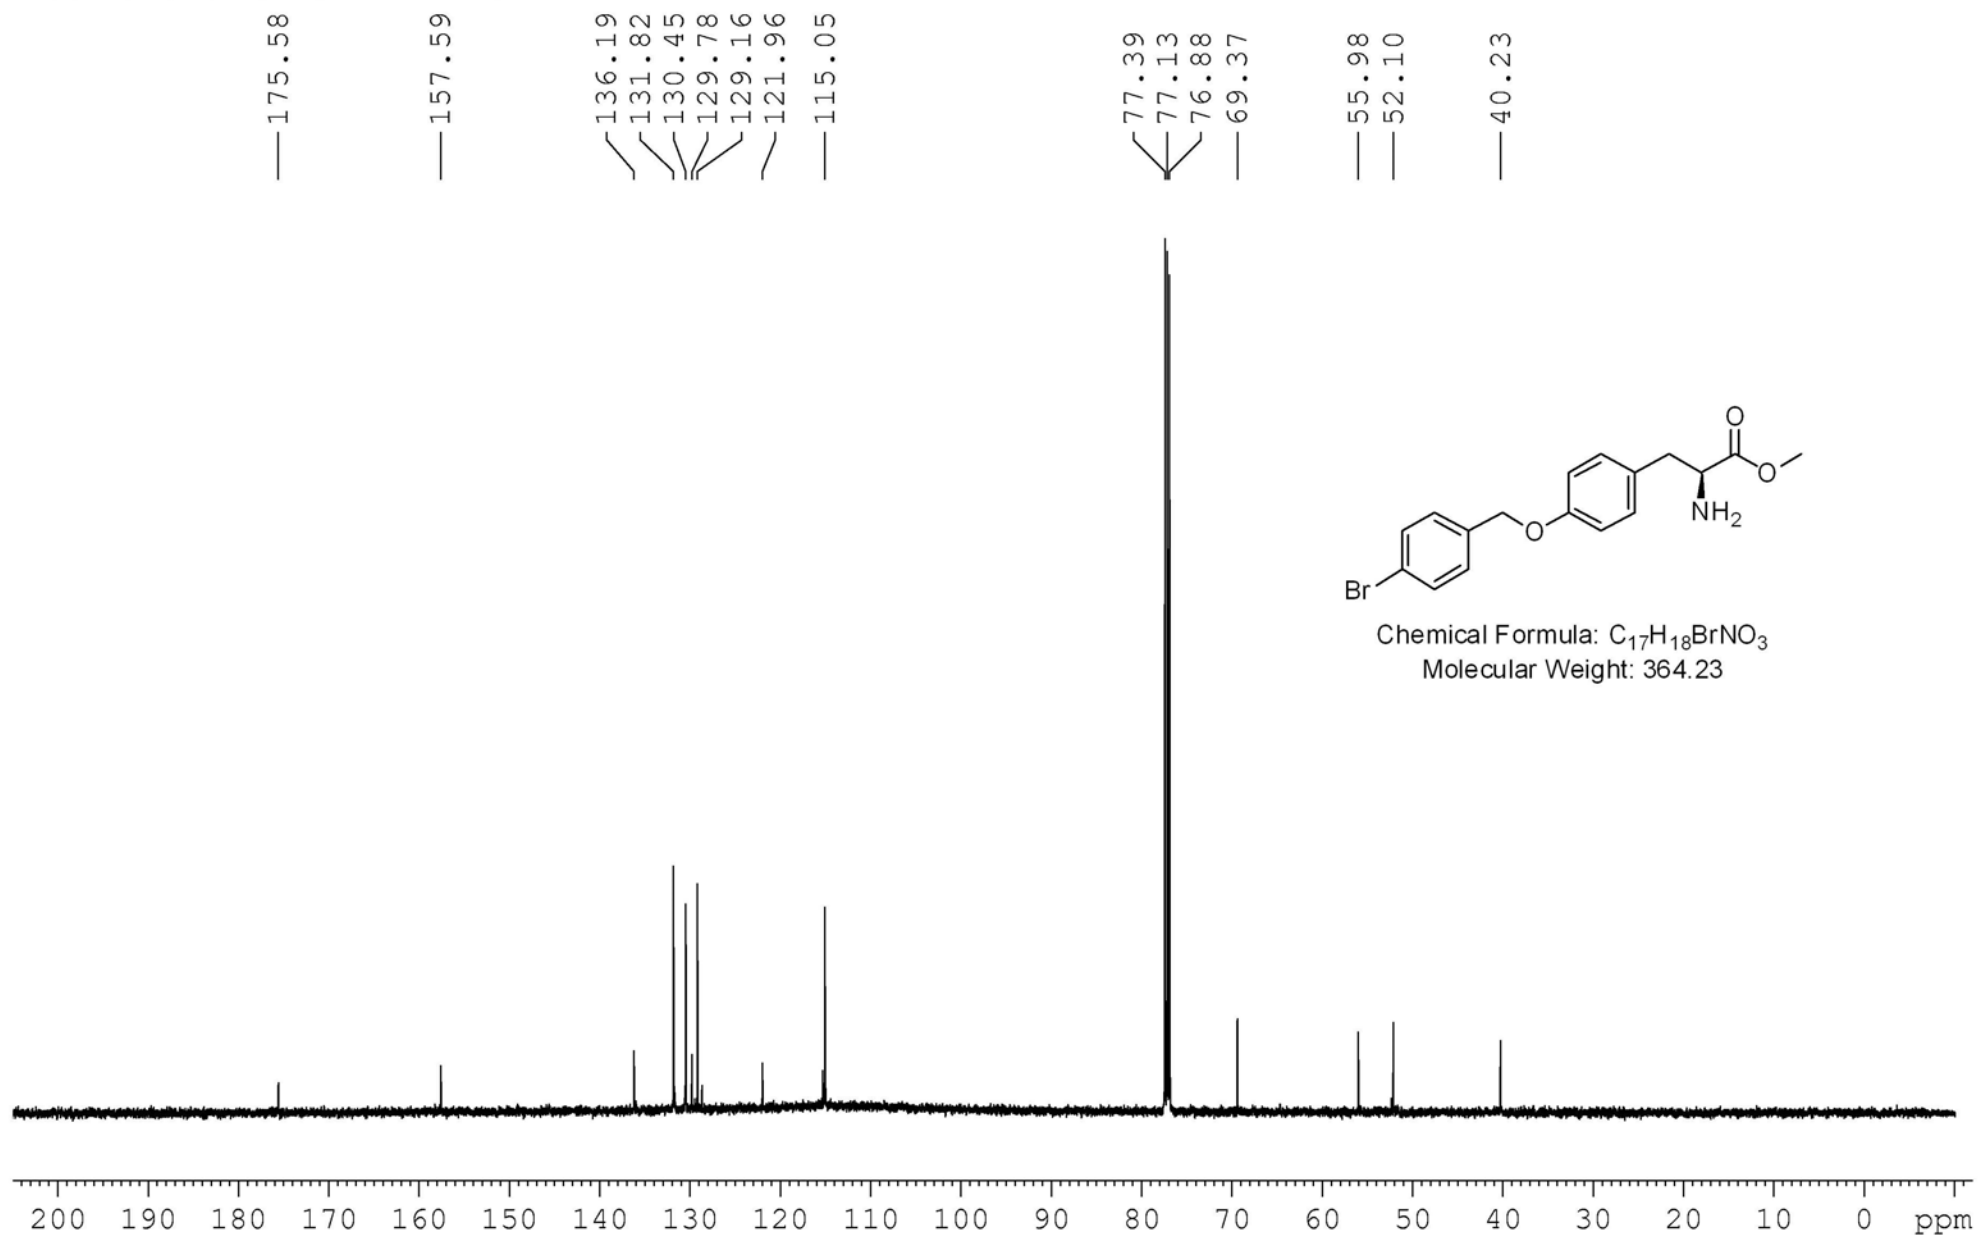

Solvent: CDCl<sub>3</sub> & NMR: 400 MHz

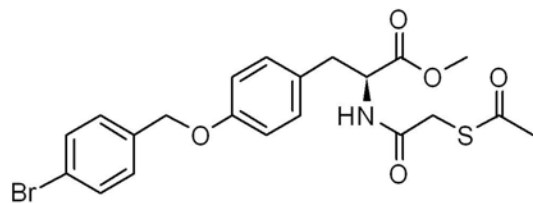

Chemical Formula: C<sub>21</sub>H<sub>22</sub>BrNO<sub>5</sub>S

Molecular Weight: 480.37

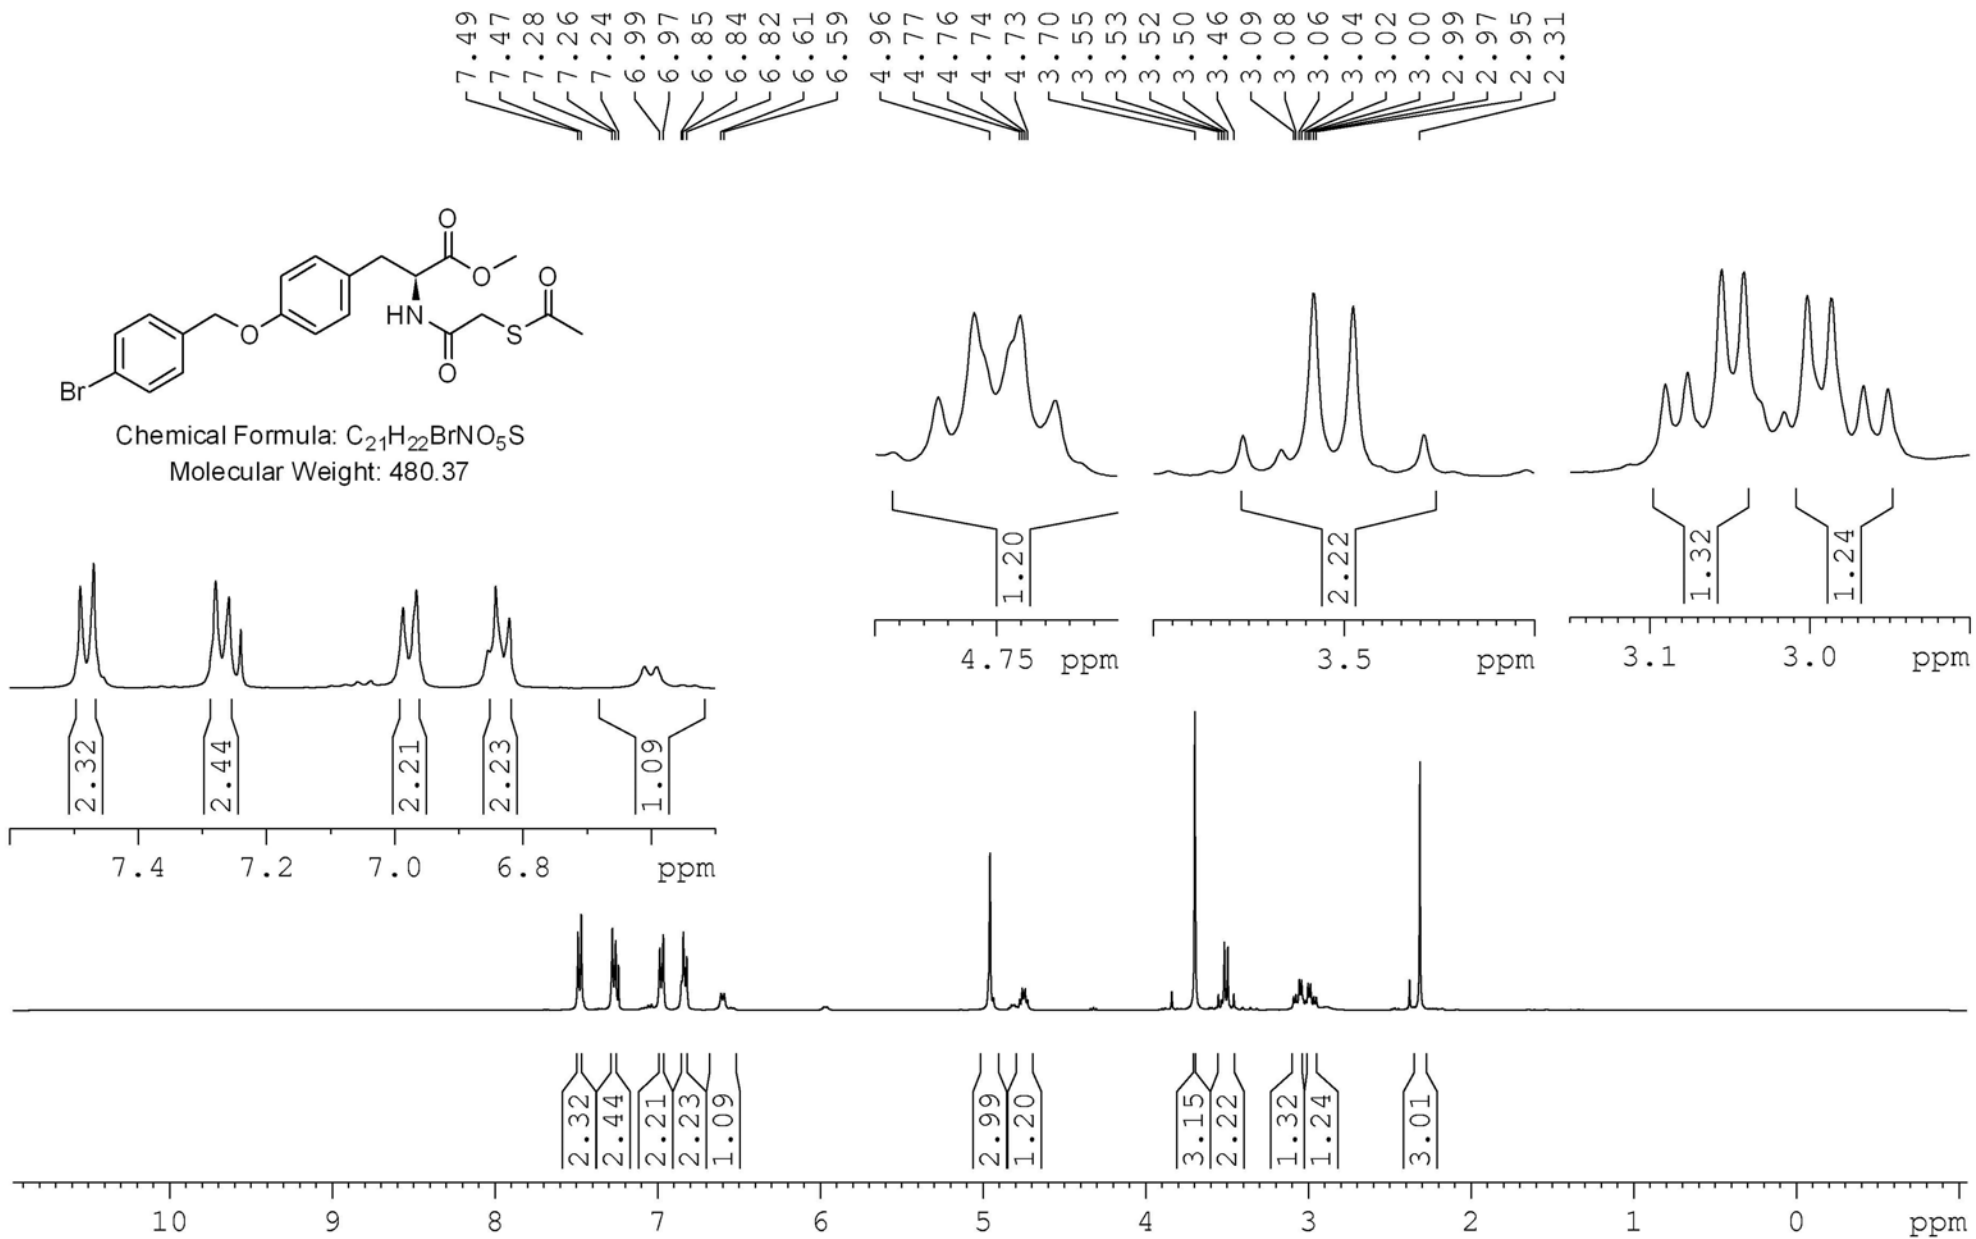

Solvent: CDCl<sub>3</sub> & NMR: 100 MHz

—195.18

—171.54

—167.61

—157.59

—135.94

—131.67

—130.33

—129.01

—128.08

—121.83

—114.82

77.32

77.00

76.68

—69.16

53.49

52.35

—36.74

—32.73

—30.12

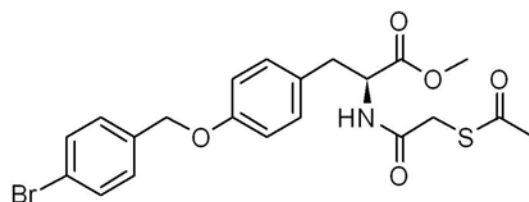

Chemical Formula: C<sub>21</sub>H<sub>22</sub>BrNO<sub>5</sub>S

Molecular Weight: 480.37

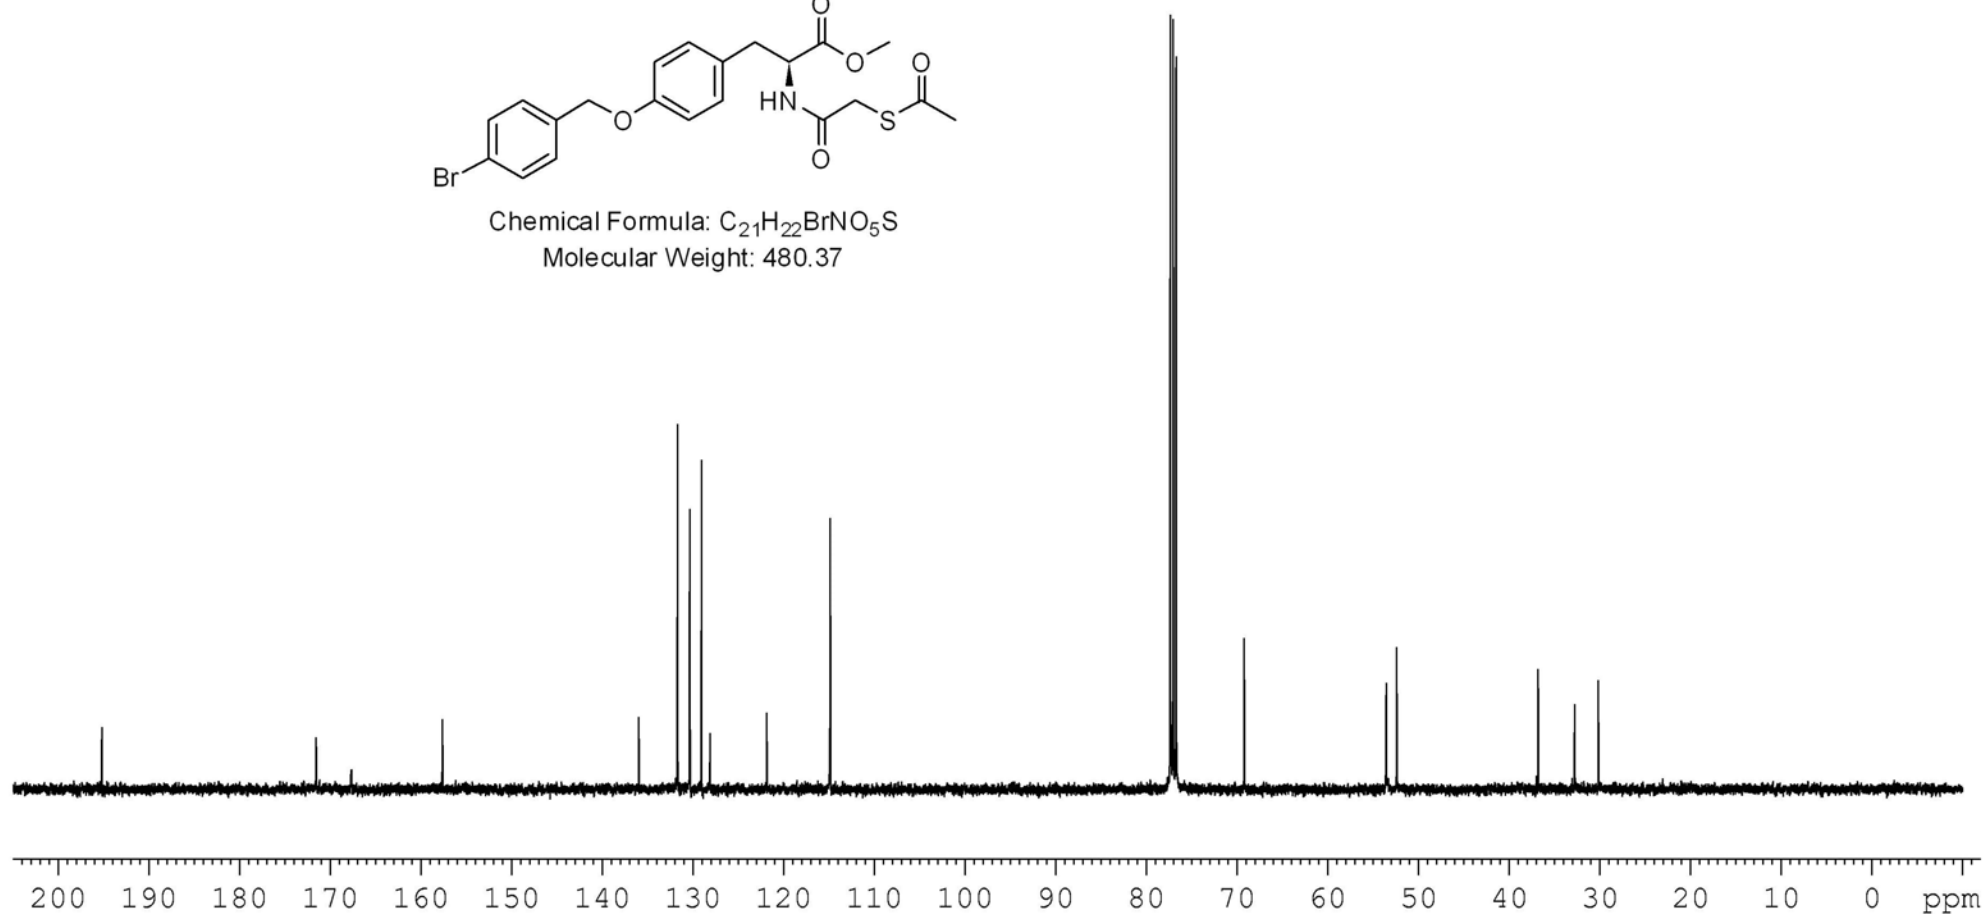

Solvent: CD<sub>3</sub>OD & NMR: 500 MHz

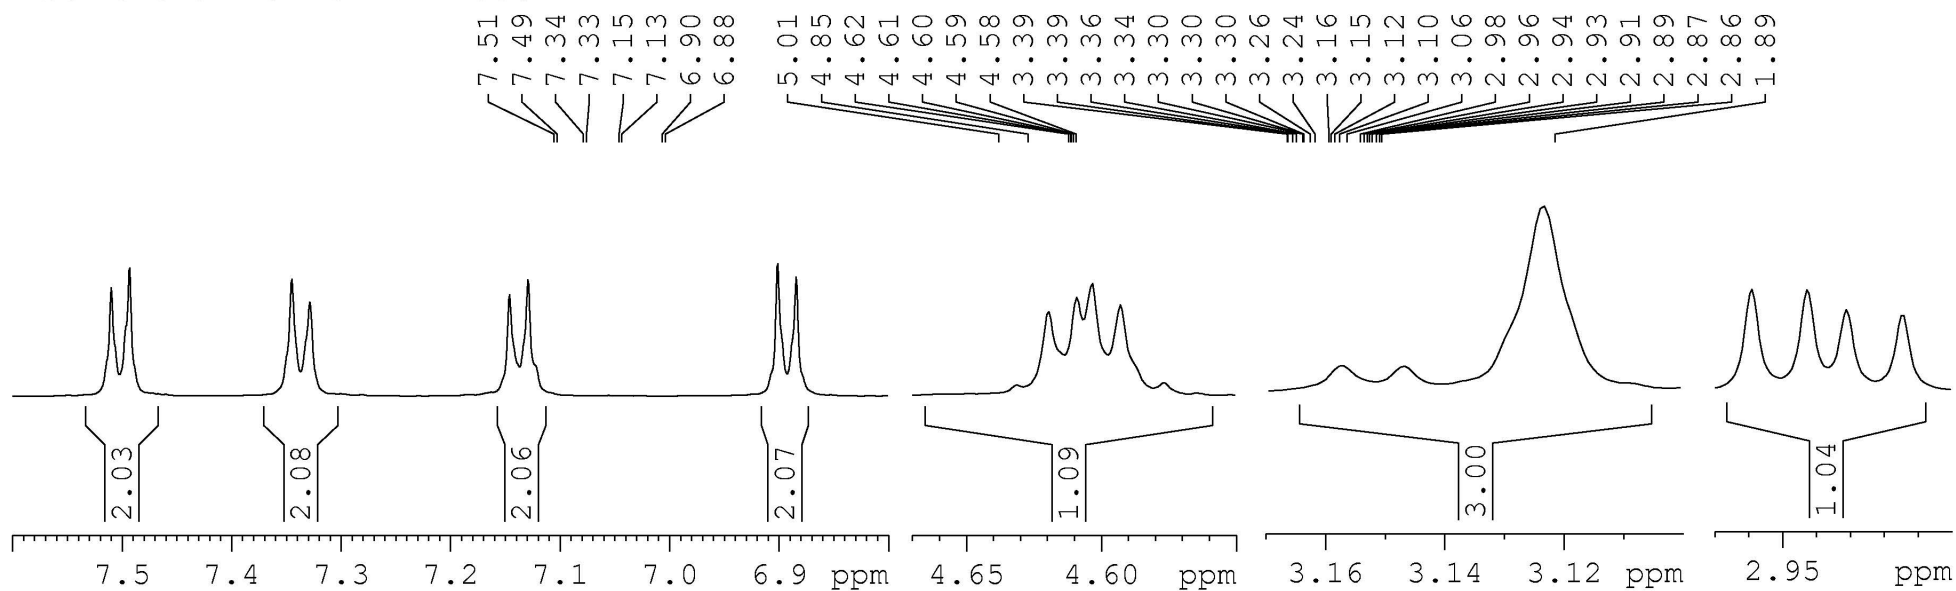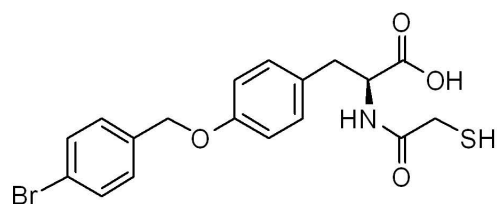

Chemical Formula: C<sub>18</sub>H<sub>18</sub>BrNO<sub>4</sub>S

Molecular Weight: 424.31

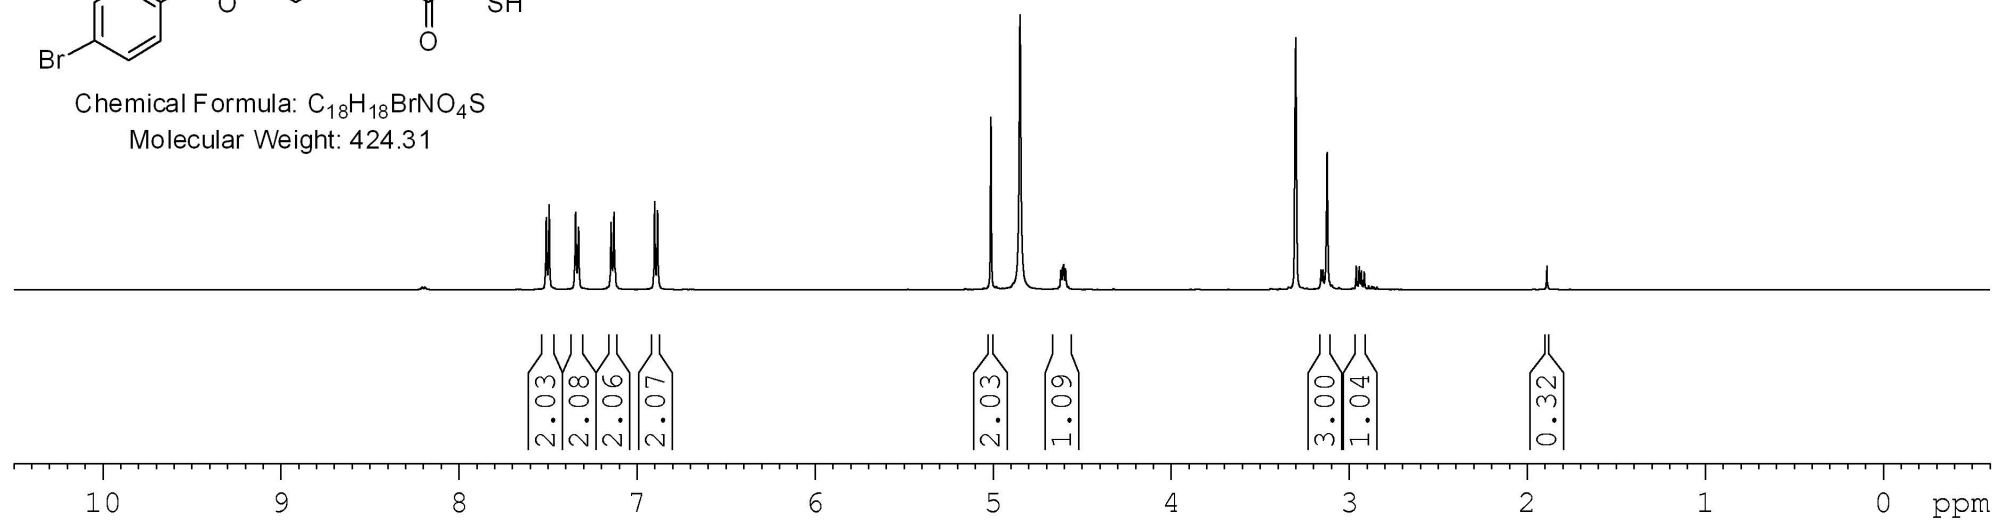

Solvent: CD<sub>3</sub>OD & NMR: 125 MHz

174.37  
172.91

159.02

138.17  
132.60  
131.47  
130.56  
130.37  
122.52  
115.95

70.15

55.32

37.54

28.00

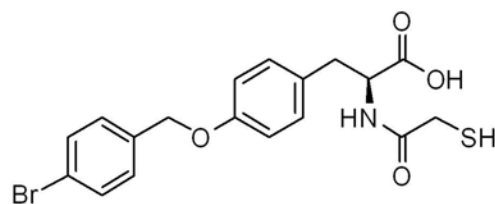

Chemical Formula: C<sub>18</sub>H<sub>18</sub>BrNO<sub>4</sub>S

Molecular Weight: 424.31

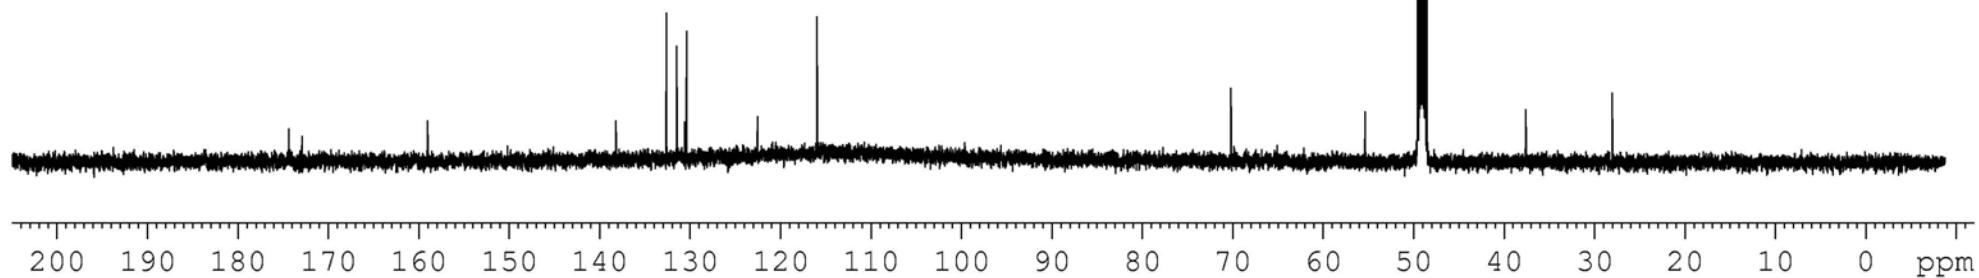

Supplement: Supplementary file 1 [file 1 › ienz_a_1651314_sm7071.pdf]
