# Supplementary material
Source: publisher figshare collection journal article supplement (https://tandf.figshare.com/articles/dataset/_/9505346)
Supplement: Supplementary file 1 [file 1]

Archive with 2 entries (2 files):
- ienz_a_1651314_sm7078.pdf
- ienz_a_1651314_sm7071.pdf
